# Supplementary material for: endo-5-Norbornene-2,3-dimethanol-promoted asymmetric Heck/Suzuki cascade reaction of N-(2-bromophenyl)acrylamides
Source: Royal Society of Chemistry journal article supplement (doi:10.1039/d2qo00998f), 2022-01-01

*Electronic Supplementary Information for:*

**Endo-5-norbornene-2,3-dimethanol promoted asymmetric  
Heck/Suzuki cascade reaction of *N*-(2-bromophenyl)acrylamides**

Ming Chen, Xing-Xing Xu, Xucai Wang, Zhi-Hui Ren, Zheng-Hui Guan\*

*Key Laboratory of Synthetic and Natural Functional Molecule of the Ministry of  
Education, Department of Chemistry & Materials Science, Northwest University,*

*Xi'an 710127, P.R. China.*

*E-mail: [guanzzhh@nwu.edu.cn](mailto:guanzzhh@nwu.edu.cn)*

**CONTENTS**

|                                                                               |            |
|-------------------------------------------------------------------------------|------------|
| <b>1. General information</b>                                                 | <b>S2</b>  |
| <b>2. Typical procedure for the asymmetric Heck/Suzuki reaction</b>           | <b>S4</b>  |
| <b>3. Typical procedure for synthesis of the racemic Heck/Suzuki products</b> | <b>S4</b>  |
| <b>4. Screening of reaction conditions</b>                                    | <b>S5</b>  |
| <b>5. Synthesis of intermediate INT-1 and mechanistic study</b>               | <b>S7</b>  |
| <b>6. Characterization data of the products</b>                               | <b>S8</b>  |
| <b>7. X-ray structure of 3o and parameters</b>                                | <b>S60</b> |
| <b>8. Copies of <sup>1</sup>H and <sup>13</sup>C NMR spectra</b>              | <b>S61</b> |

## 1. General information.

### Chemicals

Chemicals were commercially purchased from Adamas-beta, Energy Chemical, Aladdin, Daicel Chiral Technologies (China) Co., etc, and directly used without further purification unless otherwise stated. Pd(TFA)<sub>2</sub> was purchased from Adamas-beta. Toluene and mesitylene were purified by freshly distilled prior to use. Phosphoramidite ligand **L1** was prepared according to our previous report (M. Chen, X. Wang, P. Yang, X. Kou, Z.-H. Ren and Z.-H. Guan, *Angew. Chem. Int. Ed.*, 2020, **59**, 12199-12205; M. Chen, X. Wang, Z.-H. Ren and Z.-H. Guan, *CCS Chem.*, 2021, **3**, 69-77.)

**L1**: <sup>1</sup>H NMR (400 MHz, CDCl<sub>3</sub>) δ 8.09 (s, 4H), 7.87 (s, 1H), 7.73 (s, 1H), 7.27 (s, 1H), 7.21 (s, 1H), 7.06 (d, *J* = 8.0 Hz, 1H), 6.95 (t, *J* = 8.0 Hz, 1H), 6.68 (s, 1H), 6.48 (d, *J* = 4.0 Hz, 1H), 6.37 (d, *J* = 8.0 Hz, 1H), 6.34 (s, 2H), 4.14 (d, *J* = 16.0 Hz, 1H), 3.43 (dd, *J* = 16.0, 4.0 Hz, 1H), 2.93 (s, 4H), 2.72 (s, 2H), 2.42 (s, 2H), 2.02 (s, 6H), 1.94 - 1.79 (m, 6H), 1.77 - 1.57 (m, 2H); <sup>13</sup>C NMR (101 MHz, CDCl<sub>3</sub>) δ 144.6, 144.2, 143.3, 143.1, 140.0, 139.7, 139.6, 139.5, 137.8, 136.8, 135.5, 135.0, 132.0, 131.8, 131.6, 131.4, 131.3, 131.1, 130.7, 130.1, 129.9, 129.8, 129.4, 129.1, 128.9, 128.7, 128.2, 125.6, 125.5, 125.1, 124.9, 124.7, 124.6, 122.2, 122.0, 121.9, 120.9, 120.7, 120.2, 49.3, 29.2, 29.2, 27.9, 27.9, 22.6, 22.6, 22.5, 22.4, 20.9. HRMS calcd (ESI) *m/z* for C<sub>52</sub>H<sub>39</sub>F<sub>15</sub>NNaO<sub>2</sub>P: [M+Na]<sup>+</sup> 1048.2371, found 1048.2356.

The norbornenes **N10** was prepared according to literature procedures. (J. M. Goll and E. Fillion, *Organometallics*, 2008, **27**, 3622-3625; P. Liu, M. Yasir and A. F. M. Kilbinger, *Angew. Chem. Int. Ed.*, 2019, **58**, 15278-15282.)

### Chromatography

Analytical thin-layer chromatography (TLC) was carried out with silica gel pre-coated glass plates (TLC-Silica gel GF254, coating thickness: 0.20-0.25 mm, particle size: 10-40 μm) purchased from Xinnuo Chemical (Yantai, China). The TLC was visualized with a UV lamp (254 or 365 nm).

Flash Column chromatography was carried out on silica gel (60 Å, 200-300 mesh) purchased from Xinnuo Chemicals (Yantai, China) with technical grade solvents as the eluent. All the yields referred to spectroscopically and chromatographically pure compounds.

### Nuclear magnetic resonance (NMR) spectroscopy

<sup>1</sup>H NMR spectra were recorded on Bruker AVANCE III instrument (400 MHz

spectrometer). The analytical sample was dissolved in an appropriate deuterated solvent. The employed deuterated solvent and the measuring frequency are indicated in each  $^1\text{H}$  NMR data. Chemical shifts are reported in parts per million (ppm) with the solvent resonance as the internal reference ( $\text{CDCl}_3$   $\delta$  7.26). The following abbreviations (or combinations thereof) were used to explain multiplicities: s = singlet, d = doublet, t = triplet, q = quartet, m = multiplet, b = broad. Coupling constants, J were reported in Hertz unit (Hz).

$^{13}\text{C}$  NMR spectra were recorded on Bruker AVANCE III instrument (101 MHz spectrometer). The employed deuterated solvent and the measuring frequency are both indicated in each  $^{13}\text{C}$  NMR data. Chemical shifts are reported in ppm with the solvent resonance as the internal reference ( $\text{CDCl}_3$   $\delta$  77.0).

### **High resolution mass spectrometry (HRMS)**

HRMS were recorded on a liquid chromatography/quadrupole time-of-flight mass spectrometer (MicroTof-Q II mass spectrometer, Bruker Daltonics) using electrospray ionization-time of flight (ESI-TOF) at the Instrumental Analysis Center of Northwest University. The calculated values are based on the most abundant isotope.

### **Optical rotations**

Optical rotations were measured with a WZZ-2S automatic polarimeter purchased from Shanghai INESA Physico-Optical instrument company using a sodium lamp (sodium D line,  $\lambda = 589$  nm) in the indicated solvent at the indicated temperature. The measurements were carried out in a 1.5 mL cell (50 mm length) with concentrations (g/100mL) reported in the corresponding solvent. The optical rotation values ( $[\alpha]_D$ ) were reported at a given temperature ( $^\circ\text{C}$ ) in  $\text{deg. mL g}^{-1} \text{ dm}^{-1}$ .

### **High performance liquid chromatography (HPLC)**

HPLC analysis was performed on an Agilent Technologies 1260 Series using Chiralpak columns IA, IC, or IG (Daicel Chiral Reagent Company). The solvents (n-hexane and iso-propanol, HPLC-grade) used as the eluent were purchased from Oceanpak. The column type and the eluent (a mixture of n-hexane and iso-propanol) are indicated for each experiment.

### **X-ray crystallography**

X-ray crystallography was performed on a BRUKERSMA RTAPEXIICCD diffractometer at Instrumental Analysis Center of Northwest University.

## 2. Typical procedure for the asymmetric Heck/Suzuki reaction.

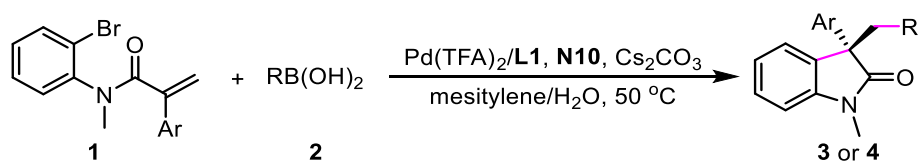

The 10 mL round-bottom flask was charged with acrylamides **1** (0.1 mmol, 1.0 equiv),  $\text{RB(OH)}_2$  (2.0 equiv),  $\text{Pd(TFA)}_2$  (8 mol%), **L1** (16 mol%), **N10** (60 mol%),  $\text{Cs}_2\text{CO}_3$  (3.0 equiv) and  $\text{H}_2\text{O}$  (0.1 mL) in mesitylene (0.5 mL) under  $\text{N}_2$  atmosphere. The reaction was then heated in  $50\text{ }^\circ\text{C}$  and stirred for 12 h. Upon completion of the reaction, the reaction mixture was cooled down to room temperature. The reaction was purified by column chromatography on silica gel with hexanes: ethyl acetate (10:1) as the eluent to afford the corresponding product **3 or 4**.

## 3. Typical procedure for synthesis of the racemic Heck/Suzuki products.

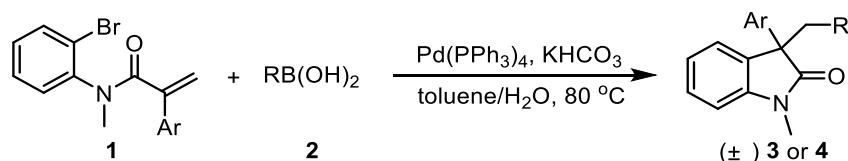

The 10 mL round-bottom flask was charged with acrylamides **1** (0.1 mmol, 1.0 equiv),  $\text{RB(OH)}_2$  (2.0 equiv),  $\text{Pd(PPh}_3)_4$  (5 mol%),  $\text{KHCO}_3$  (3.0 equiv) and  $\text{H}_2\text{O}$  (50 equiv) in toluene (0.8 mL) under  $\text{N}_2$  atmosphere. The reaction was then heated in  $80\text{ }^\circ\text{C}$  and stirred for 12 h. Upon completion of the reaction, the reaction mixture was cooled down to room temperature. The reaction was purified by column chromatography on silica gel with hexanes: ethyl acetate (10:1) as the eluent to afford the corresponding product  $(\pm)$ -**3 or 4**.



4. Table S1. Screening of catalyst and solvent.<sup>a</sup>

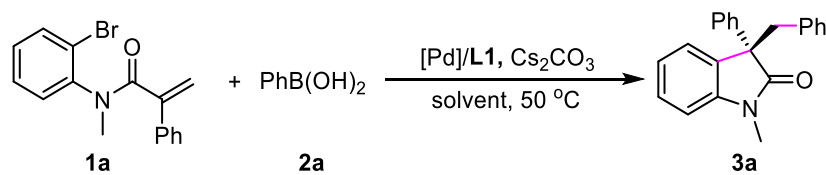

| entry          | [Pd]                  | solvent            | yield (%) | ee (%) |
|----------------|-----------------------|--------------------|-----------|--------|
| 1              | Pd(OAc) <sub>2</sub>  | Toluene            | 34        | 49     |
| 2              | Pd(TFA) <sub>2</sub>  | Toluene            | 58        | 68     |
| 3              | Pd(acac) <sub>2</sub> | Toluene            | 8         | 56     |
| 4              | Pd(dba) <sub>2</sub>  | Toluene            | 51        | 65     |
| 5              | Pd(TFA) <sub>2</sub>  | Dioxane            | 10        | 61     |
| 6              | Pd(TFA) <sub>2</sub>  | CH <sub>3</sub> CN | 0         | --     |
| 7              | Pd(TFA) <sub>2</sub>  | DMF                | 0         | --     |
| 8              | Pd(TFA) <sub>2</sub>  | Mesitylene         | 64        | 72     |
| 9 <sup>b</sup> | Pd(TFA) <sub>2</sub>  | Mesitylene         | 75        | 70     |

<sup>a</sup>Conditions: **1a** (0.1 mmol), **2a** (0.2 mmol), [Pd] (8 mol%), **L1** (16 mol%), Cs<sub>2</sub>CO<sub>3</sub> (0.3 mmol), solvent (0.5 mL), N<sub>2</sub>, 50 °C, 12 h. Isolated yield, and enantiomeric excess (ee) were determined by chiral HPLC analysis. <sup>b</sup>H<sub>2</sub>O (0.1 mL) was added.

**Table S2. Screening of phosphoramidite ligands.<sup>a</sup>**

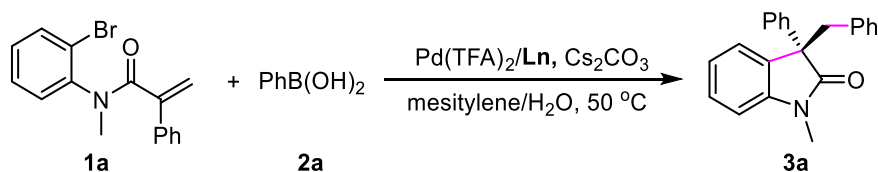

| entry | <b>Ln</b>  | yield (%) | ee (%) |
|-------|------------|-----------|--------|
| 1     | <b>L2</b>  | 30        | 3      |
| 2     | <b>L3</b>  | 53        | 0      |
| 3     | <b>L4</b>  | 61        | 5      |
| 4     | <b>L5</b>  | 26        | 30     |
| 5     | <b>L6</b>  | 24        | 16     |
| 6     | <b>L7</b>  | 49        | 40     |
| 7     | <b>L8</b>  | 26        | 39     |
| 8     | <b>L9</b>  | 42        | 50     |
| 9     | <b>L10</b> | 31        | 49     |
| 10    | <b>L11</b> | 31        | 66     |
| 11    | <b>L12</b> | 65        | 60     |

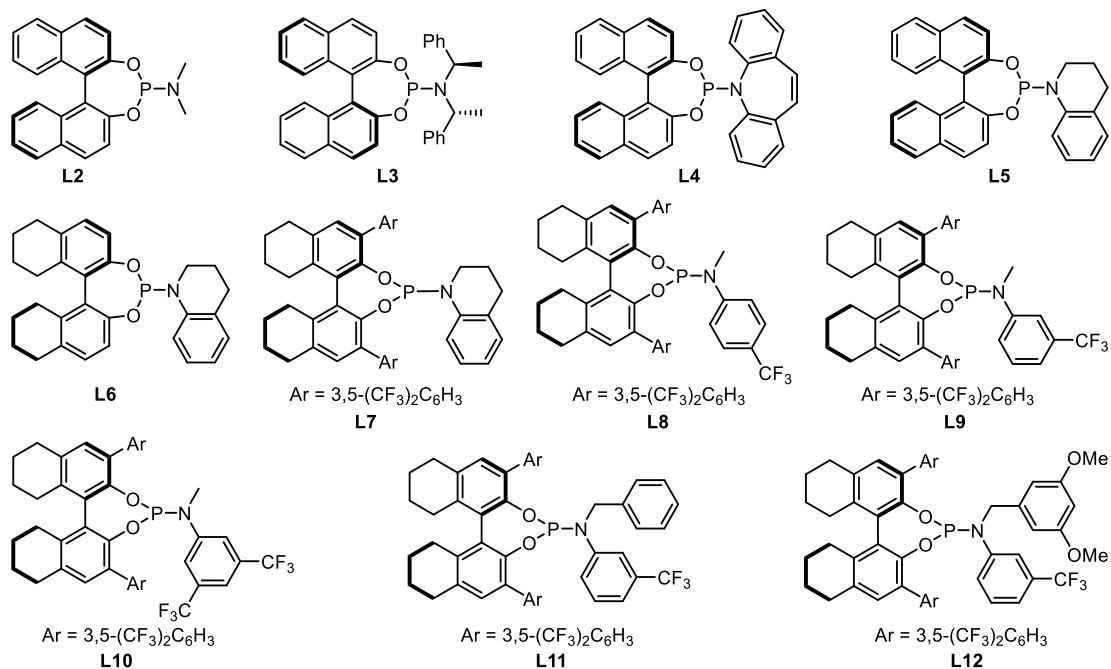

<sup>a</sup>Conditions: **1a** (0.1 mmol), **2a** (0.2 mmol), Pd(TFA)<sub>2</sub> (8 mol%), **Ln** (16 mol%), Cs<sub>2</sub>CO<sub>3</sub> (0.3 mmol), mesitylene (0.5 mL), H<sub>2</sub>O (0.1 mL), N<sub>2</sub>, 50 °C, 12 h. Isolated yield, and enantiomeric excess (ee) were determined by chiral HPLC analysis.

## 5. Synthesis of intermediate INT-1 and mechanistic study.

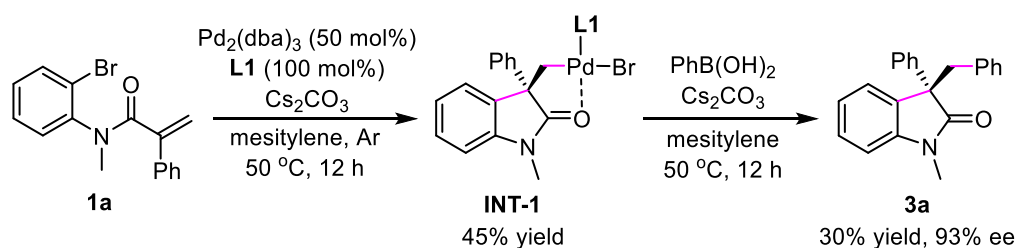

In a 10 mL round-bottom flask, acrylamides **1a** (0.1 mmol, 1.0 equiv) was added to the solution of  $\text{Pd}_2(\text{dba})_3$  (0.05 mmol, 0.5 equiv) and **L1** (0.1 mmol, 1.0 equiv) in mesitylene (2 mL). Then, the flask was evacuated and back-filled with argon (3 times) and then stirred at 50 °C for 12 h. The residue was purified by column chromatography on silica gel (hexanes: ethyl acetate = 15:1) to give the  $\sigma$ -alkyl palladium **INT-1** (45% yield).  $^1\text{H}$  NMR ( $\text{CDCl}_3$ , 400 MHz)  $\delta$  8.53 (s, 2H), 8.15 (s, 2H), 7.81 (d,  $J = 6.4$  Hz, 3H), 7.56 - 7.54 (m, 2H), 7.36 (s, 1H), 7.31 (d,  $J = 7.6$  Hz, 4H), 7.18 - 7.15 (m, 3H), 6.82 (d,  $J = 7.6$  Hz, 1H), 6.74 (d,  $J = 8.0$  Hz, 1H), 6.59 (s, 1H), 6.38 (s, 1H), 5.76 (s, 1H), 3.95 (d,  $J = 18.4$  Hz, 1H), 3.25 (d,  $J = 16.8$  Hz, 1H), 2.95 (s, 3H), 2.80 (s, 3H), 2.21 - 2.16 (m, 2H), 2.05 - 2.01 (m, 1H), 1.90 - 1.83 (m, 14H), 1.68 (t,  $J = 10.4$  Hz, 1H), 0.88 (s, 3H). HRMS calcd (ESI)  $m/z$  for  $\text{C}_{68}\text{H}_{53}\text{F}_{15}\text{N}_2\text{O}_3\text{PPd}$ :  $[\text{M}-\text{Br}]^+$  1367.2606, found: 1367.2642.

In a 10 mL round-bottom flask, the  $\sigma$ -alkyl palladium **INT-1** (0.045 mmol, 1.0 equiv),  $\text{PhB}(\text{OH})_2$  (0.09 mmol, 2.0 equiv),  $\text{Cs}_2\text{CO}_3$  (0.09 mmol, 2.0 equiv) in mesitylene (0.5 mL) was heated at 50 °C under stirring for 12 h. After the completion of the reaction, the residue was purified by column chromatography on silica gel (hexanes: ethyl acetate = 10: 1) to give the product **3a** (30% yield, 93% ee).

## 6. Characterization data of the products.

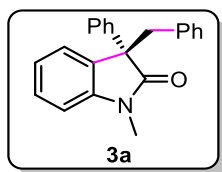

### (S)-3-benzyl-1-methyl-3-phenylindolin-2-one (**3a**)

Yield: 72% (22.5 mg), ee = 94%,  $[\alpha]_D^{21} = -79.5$  (c = 1.1, CHCl<sub>3</sub>), <sup>1</sup>H NMR (400 MHz, CDCl<sub>3</sub>) δ 7.51 - 7.48 (m, 2H), 7.34 - 7.30 (m, 2H), 7.27 - 7.24 (m, 1H), 7.21 - 7.16 (m, 2H), 7.07 - 6.97 (m, 4H), 6.83 (dd, *J* = 8.0, 2.0 Hz, 2H), 6.58 (d, *J* = 8.0 Hz, 1H), 3.70 (d, *J* = 12.8 Hz, 1H), 3.44 (d, *J* = 12.8 Hz, 1H), 2.91 (s, 3H); <sup>13</sup>C NMR (101 MHz, CDCl<sub>3</sub>) δ 177.7, 143.6, 139.6, 135.6, 131.1, 129.9, 128.5, 128.1, 127.3, 127.2, 126.4, 125.4, 122.1, 107.9, 58.2, 43.9, 25.9. HRMS (ESI) calcd. for C<sub>22</sub>H<sub>20</sub>NO [M+H]<sup>+</sup>: 314.1539, found: 314.1547.

The ee of compound **3a** was determined by HPLC using an IA<sub>Daicel</sub> column (n-hexane/i-PrOH = 95/5, flow rate = 1.0 mL/min, λ = 254 nm, *t*<sub>major</sub> = 10.24 min, *t*<sub>minor</sub> = 12.26 min).

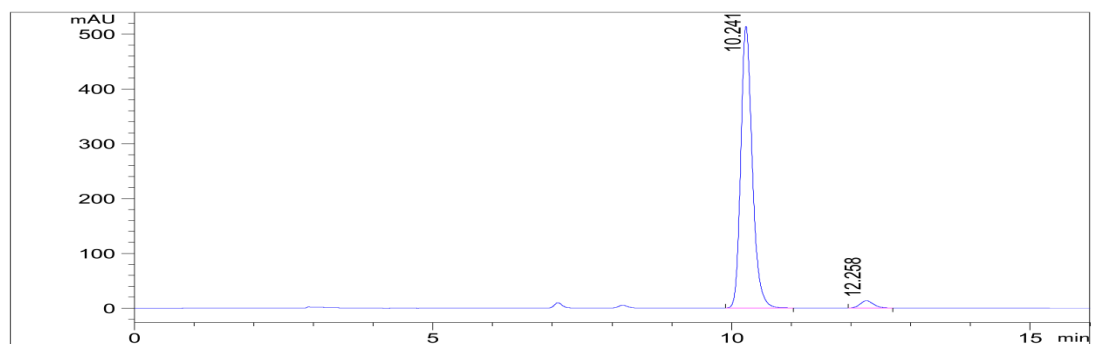

| # | Meas. RT [min] | Peak Type | Peak Height [mAU] | Peak Width [min] | Peak Area [mAU*s] | Peak Area % |
|---|----------------|-----------|-------------------|------------------|-------------------|-------------|
| 1 | 10.241         | MF        | 514.722           | 0.223            | 6887.147          | 96.974      |
| 2 | 12.258         | MF        | 13.533            | 0.265            | 214.926           | 3.026       |

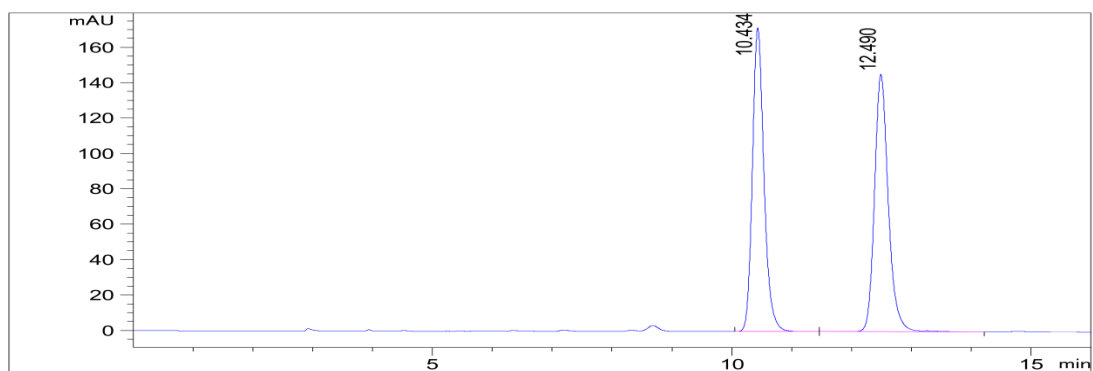

| # | Meas. RT [min] | Peak Type | Peak Height [mAU] | Peak Width [min] | Peak Area [mAU*s] | Peak Area % |
|---|----------------|-----------|-------------------|------------------|-------------------|-------------|
| 1 | 10.434         | BB        | 171.416           | 0.209            | 2306.237          | 49.699      |
| 2 | 12.490         | BV R      | 145.265           | 0.247            | 2334.162          | 50.301      |

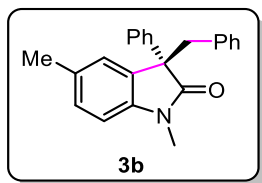

**(S)-3-benzyl-1,5-dimethyl-3-phenylindolin-2-one (3b)**

Yield: 65% (21.4 mg), ee = 97%,  $[\alpha]_D^{18} = -32.7$  (c = 1.2, CHCl<sub>3</sub>), <sup>1</sup>H NMR (400 MHz, CDCl<sub>3</sub>) δ 7.49 (d, *J* = 7.2 Hz, 2H), 7.34 (t, *J* = 7.2 Hz, 2H), 7.28 (d, *J* = 7.2 Hz, 1H), 7.05 - 6.99 (m, 5H), 6.82 (dd, *J* = 7.6, 1.2 Hz, 2H), 6.49 (d, *J* = 8.4 Hz, 1H), 3.68 (d, *J* = 12.8 Hz, 1H), 3.44 (d, *J* = 12.8 Hz, 1H), 2.91 (s, 3H), 2.34 (s, 3H); <sup>13</sup>C NMR (101 MHz, CDCl<sub>3</sub>) δ 177.7, 141.4, 139.9, 135.7, 131.6, 131.4, 130.0, 128.5, 128.4, 127.3, 127.2, 126.4, 126.1, 107.7, 58.3, 43.8, 26.0, 21.2. HRMS (ESI) calcd. for C<sub>23</sub>H<sub>22</sub>NO [M+H]<sup>+</sup>: 328.1696, found: 328.1696.

The ee of compound **3b** was determined by HPLC using an IA<sub>Daicel</sub> column (n-hexane/i-PrOH = 95/5, flow rate = 1.0 mL/min, λ = 254 nm, t<sub>major</sub> = 9.67 min, t<sub>minor</sub> = 12.60 min).

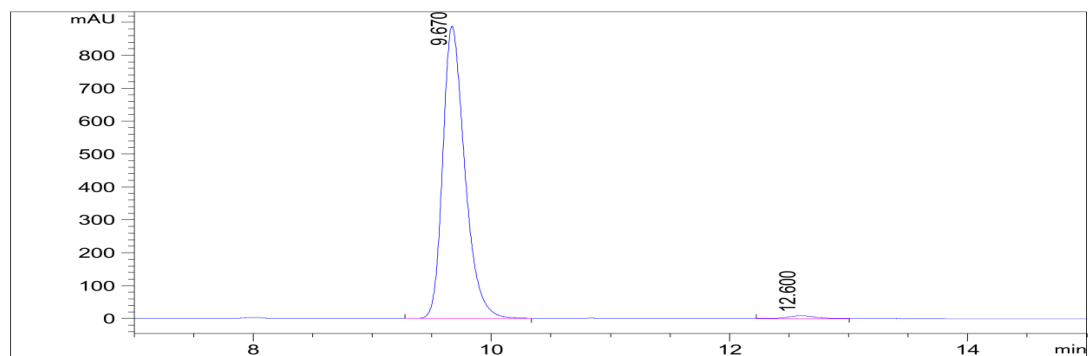

| # | Meas. RT [min] | Peak Type | Peak Height [mAU] | Peak Width [min] | Peak Area [mAU*s] | Peak Area % |
|---|----------------|-----------|-------------------|------------------|-------------------|-------------|
| 1 | 9.670          | MF        | 889.155           | 0.215            | 11465.117         | 98.731      |
| 2 | 12.600         | MM        | 8.695             | 0.282            | 147.346           | 1.269       |

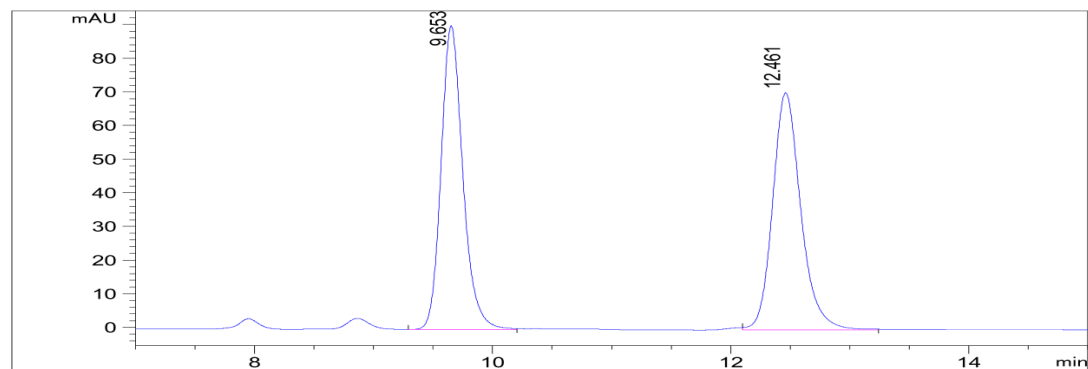

| # | Meas. RT [min] | Peak Type | Peak Height [mAU] | Peak Width [min] | Peak Area [mAU*s] | Peak Area % |
|---|----------------|-----------|-------------------|------------------|-------------------|-------------|
| 1 | 9.653          | MF        | 90.323            | 0.212            | 1148.411          | 49.791      |
| 2 | 12.461         | FM        | 70.476            | 0.274            | 1158.044          | 50.209      |

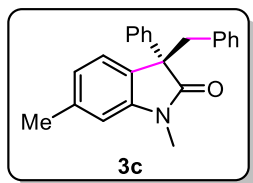

**(S)-3-benzyl-1,6-dimethyl-3-phenylindolin-2-one (3c)**

Yield: 77% (25.2 mg), ee = 96%,  $[\alpha]_D^{18} = -70.9$  (c = 1.1, CHCl<sub>3</sub>), <sup>1</sup>H NMR (400 MHz, CDCl<sub>3</sub>) δ 7.50 (d, *J* = 8.0 Hz, 2H), 7.31 (t, *J* = 7.2 Hz, 2H), 7.24 (t, *J* = 7.2 Hz, 1H), 7.06 - 7.00 (m, 4H), 6.88 - 6.83 (m, 3H), 6.43 (s, 1H), 3.65 (d, *J* = 12.8 Hz, 1H), 3.43 (d, *J* = 12.8 Hz, 1H), 2.91 (s, 3H), 2.31 (s, 3H); <sup>13</sup>C NMR (101 MHz, CDCl<sub>3</sub>) δ 178.0, 143.7, 139.9, 138.1, 135.8, 130.0, 128.4, 128.0, 127.3, 127.2, 126.4, 125.2, 122.6, 108.9, 57.9, 43.9, 25.9, 21.7. HRMS (ESI) calcd. for C<sub>23</sub>H<sub>22</sub>NO [M+H]<sup>+</sup>: 328.1696, found: 328.1697.

The ee of compound **3c** was determined by HPLC using an IC<sub>Daicel</sub> column (n-hexane/*i*-PrOH = 70/30, flow rate = 1.0 mL/min, λ = 254 nm, *t*<sub>major</sub> = 6.74 min, *t*<sub>minor</sub> = 11.60 min).

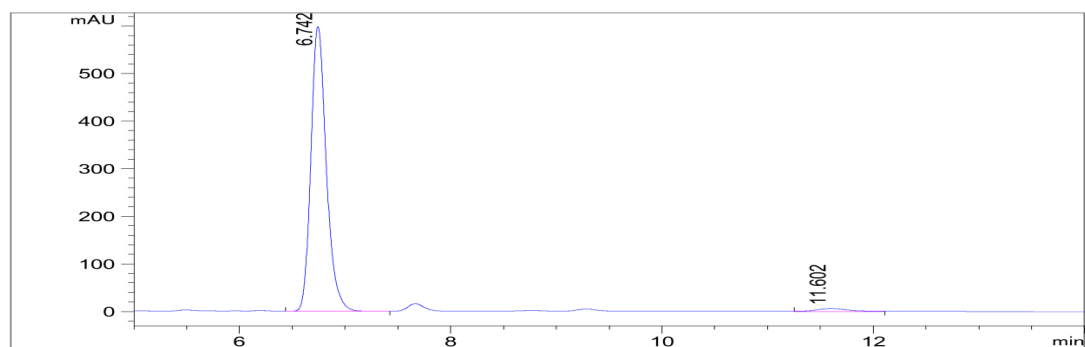

| # | Meas. RT [min] | Peak Type | Peak Height [mAU] | Peak Width [min] | Peak Area [mAU*s] | Peak Area % |
|---|----------------|-----------|-------------------|------------------|-------------------|-------------|
| 1 | 6.742          | BB        | 596.690           | 0.155            | 6074.348          | 97.760      |
| 2 | 11.602         | MM        | 6.411             | 0.362            | 139.177           | 2.240       |

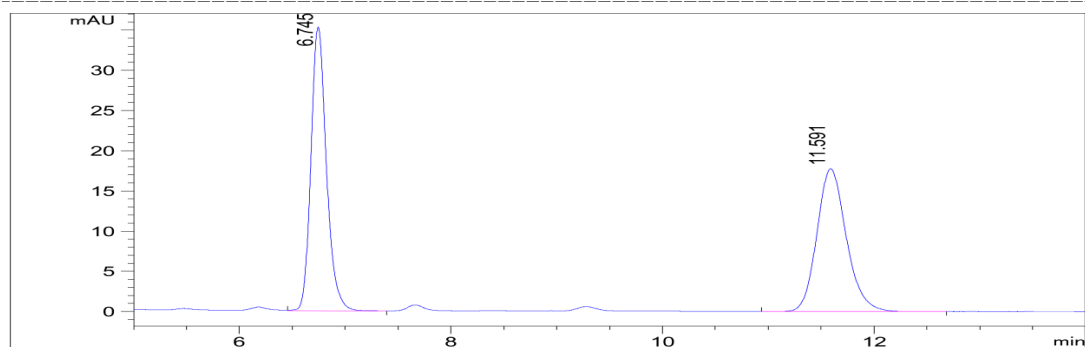

| # | Meas. RT [min] | Peak Type | Peak Height [mAU] | Peak Width [min] | Peak Area [mAU*s] | Peak Area % |
|---|----------------|-----------|-------------------|------------------|-------------------|-------------|
| 1 | 6.745          | FM        | 35.305            | 0.169            | 358.193           | 51.039      |
| 2 | 11.591         | BB        | 17.763            | 0.298            | 343.609           | 48.961      |

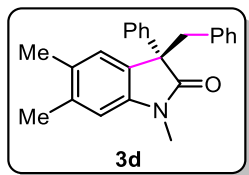

**(S)-3-benzyl-1,5,6-trimethyl-3-phenylindolin-2-one (3d)**

Yield: 53% (18.0 mg), ee = 93%,  $[\alpha]_D^{32} = -38.8$  (c = 1.2, CHCl<sub>3</sub>), <sup>1</sup>H NMR (400 MHz, CDCl<sub>3</sub>) δ 7.49 (d, *J* = 8.0 Hz, 2H), 7.35 - 7.31 (m, 2H), 7.28 - 7.24 (m, 1H), 7.05 - 6.99 (m, 3H), 6.93 (s, 1H), 6.83 (d, *J* = 7.2 Hz, 2H), 6.42 (s, 1H), 3.64 (d, *J* = 13.6 Hz, 1H), 3.45 (d, *J* = 12.4 Hz, 1H), 2.91 (s, 3H), 2.24 (t, *J* = 2.0 Hz, 6H); <sup>13</sup>C NMR (101 MHz, CDCl<sub>3</sub>) δ 177.9, 141.6, 140.1, 136.2, 135.9, 130.0, 129.9, 128.5, 128.4, 127.3, 127.2, 126.6, 126.4, 109.4, 58.1, 43.8, 26.0, 20.2, 19.6. HRMS (ESI) calcd. for C<sub>24</sub>H<sub>24</sub>NO [M+H]<sup>+</sup>: 342.1852, found: 342.1859.

The ee of compound **3d** was determined by HPLC using an IC<sub>Daicel</sub> column (n-hexane/*i*-PrOH = 80/20, flow rate = 1.0 mL/min, λ = 254 nm, *t*<sub>major</sub> = 8.83 min, *t*<sub>minor</sub> = 15.46 min).

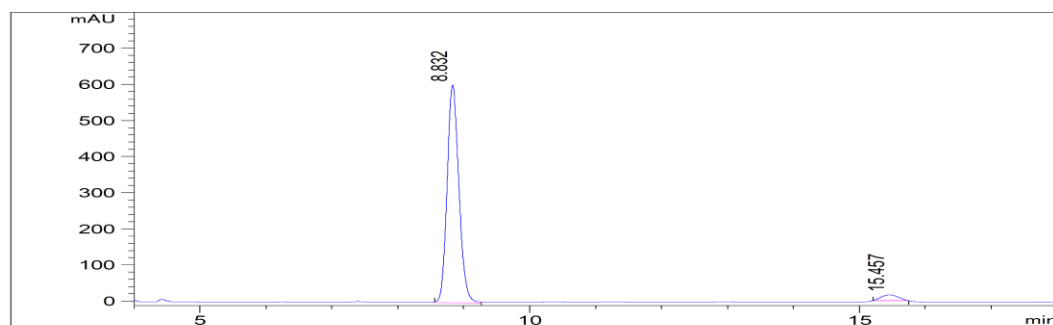

| # | Meas. RT [min] | Peak Type | Peak Height [mAU] | Peak Width [min] | Peak Area [mAU*s] | Peak Area % |
|---|----------------|-----------|-------------------|------------------|-------------------|-------------|
| 1 | 8.832          | MM        | 602.284           | 0.207            | 7479.896          | 96.320      |
| 2 | 15.457         | MM        | 15.659            | 0.304            | 285.814           | 3.680       |

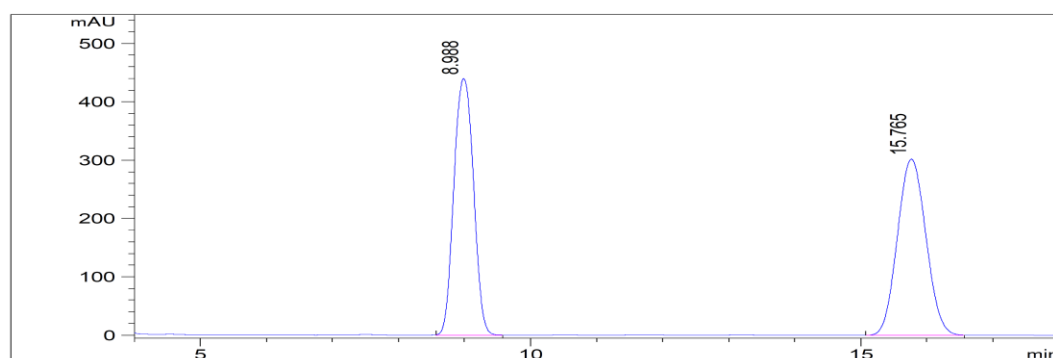

| # | Meas. RT [min] | Peak Type | Peak Height [mAU] | Peak Width [min] | Peak Area [mAU*s] | Peak Area % |
|---|----------------|-----------|-------------------|------------------|-------------------|-------------|
| 1 | 8.988          | FM        | 439.784           | 0.345            | 9093.594          | 50.014      |
| 2 | 15.765         | MF        | 302.398           | 0.501            | 9088.509          | 49.986      |

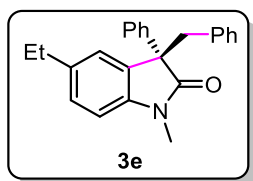

**(S)-3-benzyl-5-ethyl-1-methyl-3-phenylindolin-2-one (3e)**

Yield: 72% (24.6 mg), ee = 97%,  $[\alpha]_D^{19} = -56.6$  (c = 1.0, CHCl<sub>3</sub>), <sup>1</sup>H NMR (400 MHz, CDCl<sub>3</sub>) δ 7.50 (d, *J* = 7.6 Hz, 2H), 7.34 (t, *J* = 7.2 Hz, 2H), 7.29 (d, *J* = 7.2 Hz, 1H), 7.05 - 6.98 (m, 5H), 6.82 (d, *J* = 6.8 Hz, 2H), 6.52 (d, *J* = 7.6 Hz, 1H), 3.67 (d, *J* = 12.8 Hz, 1H), 3.45 (d, *J* = 12.8 Hz, 1H), 2.93 (s, 3H), 2.68 - 2.60 (m, 2H), 1.22 (t, *J* = 7.6 Hz, 3H); <sup>13</sup>C NMR (101 MHz, CDCl<sub>3</sub>) δ 177.8, 141.5, 139.8, 138.3, 135.8, 131.2, 130.0, 128.5, 127.3, 127.3, 127.3, 126.4, 125.2, 107.7, 58.3, 44.0, 28.7, 26.1, 16.2. HRMS (ESI) calcd. for C<sub>24</sub>H<sub>24</sub>NO [M+H]<sup>+</sup>: 342.1852, found: 342.1860.

The ee of compound **3e** was determined by HPLC using an IA<sub>Daicel</sub> column (n-hexane/*i*-PrOH = 95/5, flow rate = 1.0 mL/min, λ = 254 nm, *t*<sub>major</sub> = 12.60 min, *t*<sub>minor</sub> = 16.21 min).

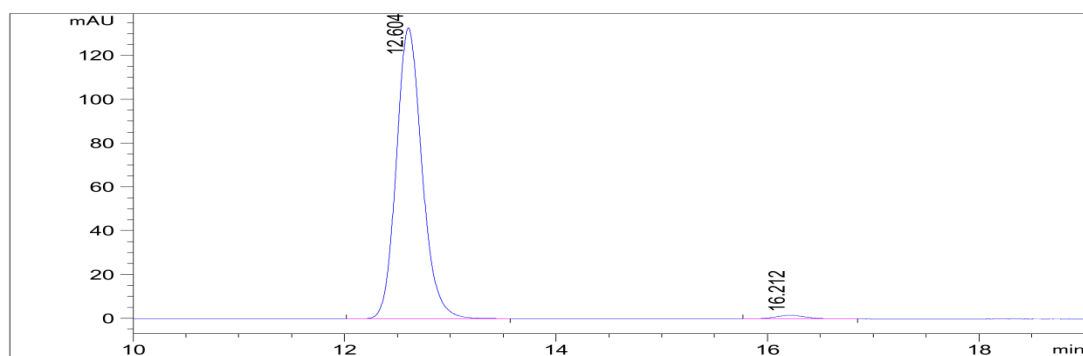

| # | Meas. RT [min] | Peak Type | Peak Height [mAU] | Peak Width [min] | Peak Area [mAU*s] | Peak Area % |
|---|----------------|-----------|-------------------|------------------|-------------------|-------------|
| 1 | 12.604         | MF        | 132.907           | 0.282            | 2248.198          | 98.584      |
| 2 | 16.212         | MM        | 1.583             | 0.340            | 32.299            | 1.416       |

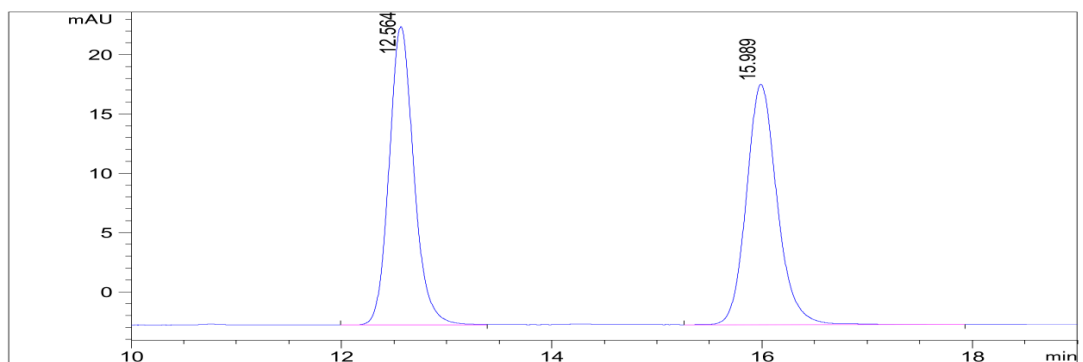

| # | Meas. RT [min] | Peak Type | Peak Height [mAU] | Peak Width [min] | Peak Area [mAU*s] | Peak Area % |
|---|----------------|-----------|-------------------|------------------|-------------------|-------------|
| 1 | 12.564         | MF        | 25.179            | 0.273            | 411.885           | 49.948      |
| 2 | 15.989         | VB        | 20.268            | 0.310            | 412.742           | 50.052      |



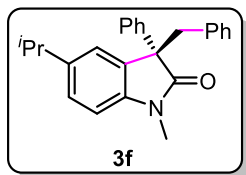

**(S)-3-benzyl-5-isopropyl-1-methyl-3-phenylindolin-2-one (3f)**

Yield: 70% (24.9 mg), ee = 97%,  $[\alpha]_D^{18} = -79.6$  (c = 0.7, CHCl<sub>3</sub>), <sup>1</sup>H NMR (400 MHz, CDCl<sub>3</sub>) δ 7.51 (d, *J* = 7.6 Hz, 2H), 7.35 (t, *J* = 6.8 Hz, 2H), 7.29 (d, *J* = 7.2 Hz, 1H), 7.06 - 6.98 (m, 5H), 6.81 (d, *J* = 6.8 Hz, 2H), 6.52 (d, *J* = 8.0 Hz, 1H), 3.66 (d, *J* = 12.8 Hz, 1H), 3.46 (d, *J* = 12.4 Hz, 1H), 2.95 (s, 3H), 2.93 - 2.86 (m, 1H), 1.24 (t, *J* = 6.4 Hz, 6H); <sup>13</sup>C NMR (101 MHz, CDCl<sub>3</sub>) δ 177.8, 142.9, 141.6, 139.7, 135.8, 130.9, 130.0, 128.5, 127.4, 127.3, 126.4, 125.8, 123.9, 107.6, 58.3, 44.1, 33.9, 26.1, 24.6, 24.0. HRMS (ESI) calcd. for C<sub>25</sub>H<sub>26</sub>NO [M+H]<sup>+</sup>: 356.2009, found: 356.2011.

The ee of compound **3f** was determined by HPLC using an IA<sub>Daicel</sub> column (n-hexane/i-PrOH = 95/5, flow rate = 1.0 mL/min, λ = 254 nm, *t*<sub>major</sub> = 7.51 min, *t*<sub>minor</sub> = 10.34 min).

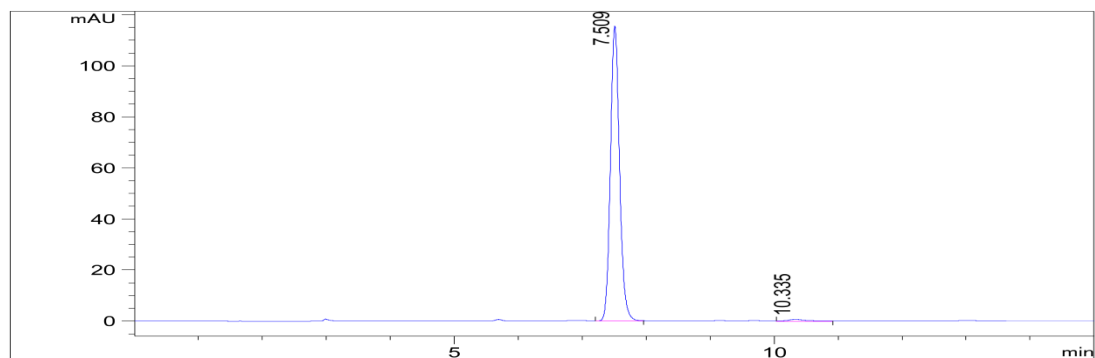

| # | Meas. RT [min] | Peak Type | Peak Height [mAU] | Peak Width [min] | Peak Area [mAU*s] | Peak Area % |
|---|----------------|-----------|-------------------|------------------|-------------------|-------------|
| 1 | 7.509          | MF        | 115.801           | 0.165            | 1144.833          | 98.276      |
| 2 | 10.335         | MM        | 0.827             | 0.405            | 20.082            | 1.724       |

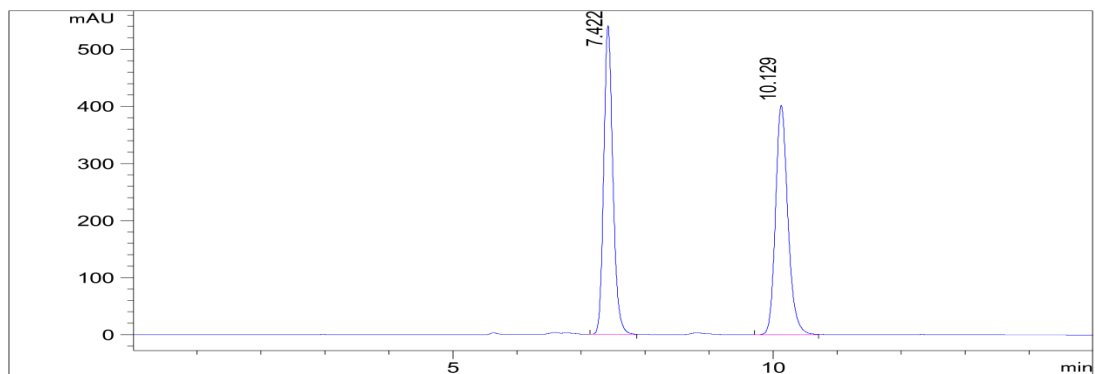

| # | Meas. RT [min] | Peak Type | Peak Height [mAU] | Peak Width [min] | Peak Area [mAU*s] | Peak Area % |
|---|----------------|-----------|-------------------|------------------|-------------------|-------------|
| 1 | 7.422          | MF        | 541.245           | 0.166            | 5381.096          | 49.895      |
| 2 | 10.129         | MF        | 402.017           | 0.224            | 5403.739          | 50.105      |

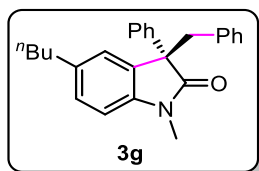

**(S)-3-benzyl-5-butyl-1-methyl-3-phenylindolin-2-one (3g)**

Yield: 56% (20.7 mg), ee = 98%,  $[\alpha]_D^{18} = -146.8$  (c = 0.4, CHCl<sub>3</sub>), <sup>1</sup>H NMR (400 MHz, CDCl<sub>3</sub>) δ 7.50 (d, *J* = 7.2 Hz, 2H), 7.34 (t, *J* = 6.8 Hz, 2H), 7.28 (d, *J* = 7.2 Hz, 1H), 7.05 - 6.98 (m, 5H), 6.83 (d, *J* = 6.4 Hz, 2H), 6.51 (d, *J* = 8.4 Hz, 1H), 3.69 (d, *J* = 12.8 Hz, 1H), 3.44 (d, *J* = 12.8 Hz, 1H), 2.94 (s, 3H), 2.60 (dd, *J* = 15.2, 7.6 Hz, 2H), 1.61 - 1.56 (m, 2H), 1.34 (dd, *J* = 14.8, 7.2 Hz, 2H), 0.95 (t, *J* = 7.2 Hz, 3H); <sup>13</sup>C NMR (101 MHz, CDCl<sub>3</sub>) δ 177.8, 141.5, 139.9, 136.8, 135.8, 131.1, 130.0, 128.5, 127.9, 127.3, 127.3, 126.4, 125.7, 107.6, 58.3, 43.9, 35.3, 34.0, 26.1, 22.1, 14.0. HRMS (ESI) calcd. for C<sub>26</sub>H<sub>28</sub>NO [M+H]<sup>+</sup>: 370.2165, found: 370.2162.

The ee of compound **3g** was determined by HPLC using an IA<sub>Daicel</sub> column (n-hexane/*i*-PrOH = 95/5, flow rate = 1.0mL/min, λ = 254nm, *t*<sub>major</sub> = 7.18 min, *t*<sub>minor</sub> = 9.12 min).

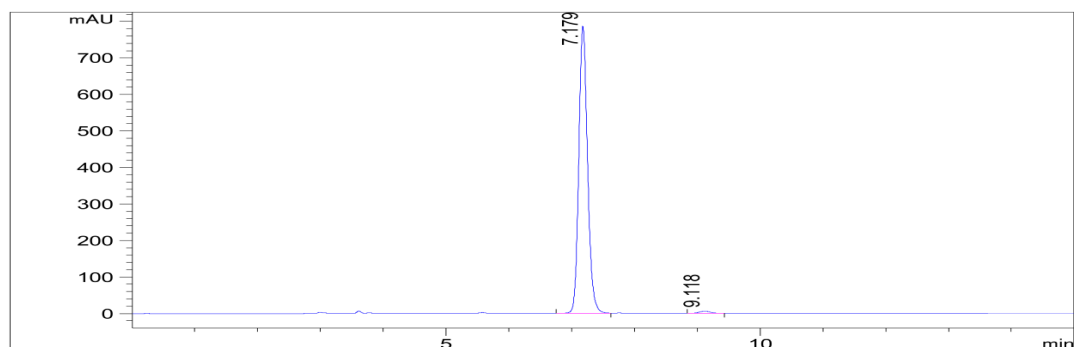

| # | Meas. RT [min] | Peak Type | Peak Height [mAU] | Peak Width [min] | Peak Area [mAU*s] | Peak Area % |
|---|----------------|-----------|-------------------|------------------|-------------------|-------------|
| 1 | 7.179          | MF        | 787.851           | 0.161            | 7614.782          | 99.083      |
| 2 | 9.118          | MM        | 5.983             | 0.196            | 70.493            | 0.917       |

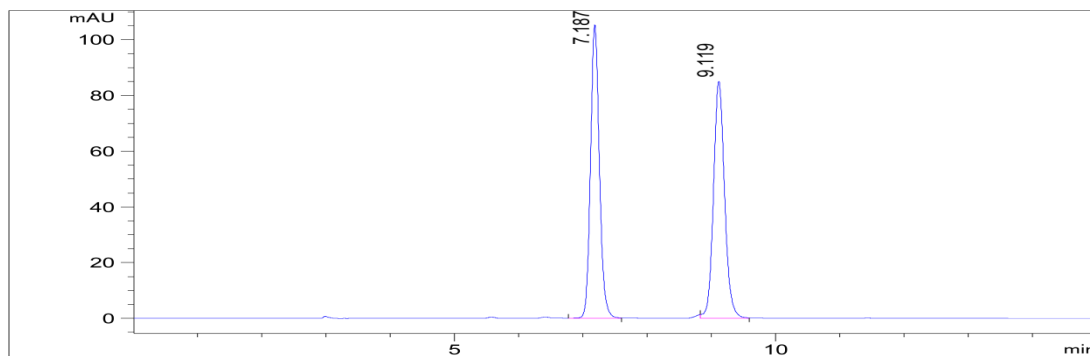

| # | Meas. RT [min] | Peak Type | Peak Height [mAU] | Peak Width [min] | Peak Area [mAU*s] | Peak Area % |
|---|----------------|-----------|-------------------|------------------|-------------------|-------------|
| 1 | 7.187          | MF        | 105.441           | 0.160            | 1013.711          | 49.718      |
| 2 | 9.119          | MF        | 85.176            | 0.201            | 1025.192          | 50.282      |

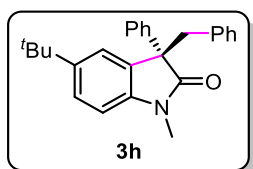

**(S)-3-benzyl-5-(tert-butyl)-1-methyl-3-phenylindolin-2-one (3h)**

Yield: 74% (27.3 mg), ee = 98%,  $[\alpha]_D^{18} = -88.4$  (c = 0.5, CHCl<sub>3</sub>), <sup>1</sup>H NMR (400 MHz, CDCl<sub>3</sub>) δ 7.52 (d, *J* = 7.2 Hz, 2H), 7.35 (t, *J* = 7.2 Hz, 2H), 7.29 (d, *J* = 6.8 Hz, 1H), 7.21 (dd, *J* = 8.4, 2.0 Hz, 1H), 7.17 (d, *J* = 1.6 Hz, 1H), 7.04 - 6.98 (m, 3H), 6.80 (d, *J* = 6.8 Hz, 2H), 6.54 (d, *J* = 8.0 Hz, 1H), 3.65 (d, *J* = 12.8 Hz, 1H), 3.47 (d, *J* = 13.2 Hz, 1H), 2.96 (s, 3H), 1.31 (s, 9H); <sup>13</sup>C NMR (101 MHz, CDCl<sub>3</sub>) δ 177.9, 145.1, 141.3, 139.7, 135.9, 130.4, 130.1, 128.5, 127.4, 127.3, 126.4, 124.4, 123.3, 107.3, 58.3, 44.2, 34.5, 31.5, 26.1. HRMS (ESI) calcd. for C<sub>26</sub>H<sub>28</sub>NO [M+H]<sup>+</sup>: 370.2165, found: 370.2168.

The ee of compound **3h** was determined by HPLC using an IA<sub>Daicel</sub> column (n-hexane/*i*-PrOH = 95/5, flow rate = 1.0 mL/min, λ = 254 nm, *t*<sub>major</sub> = 6.86 min, *t*<sub>minor</sub> = 9.06 min).

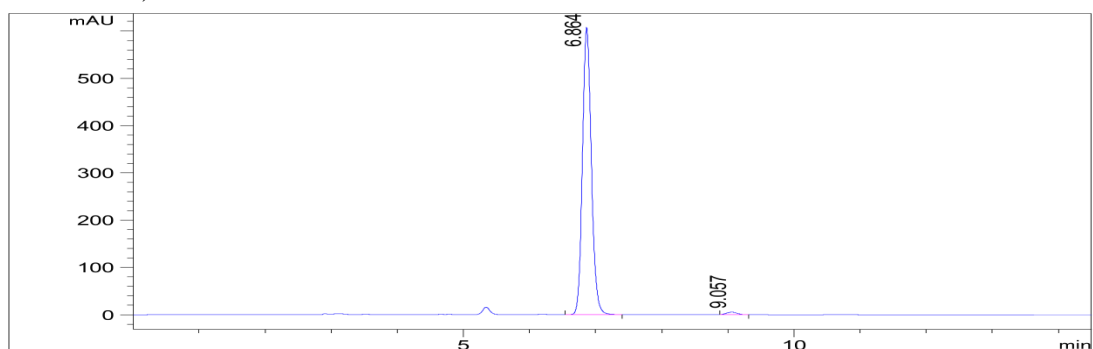

| # | Meas. RT [min] | Peak Type | Peak Height [mAU] | Peak Width [min] | Peak Area [mAU*s] | Peak Area % |
|---|----------------|-----------|-------------------|------------------|-------------------|-------------|
| 1 | 6.864          | MF        | 608.052           | 0.157            | 5711.472          | 98.866      |
| 2 | 9.057          | FM        | 5.516             | 0.198            | 65.529            | 1.134       |

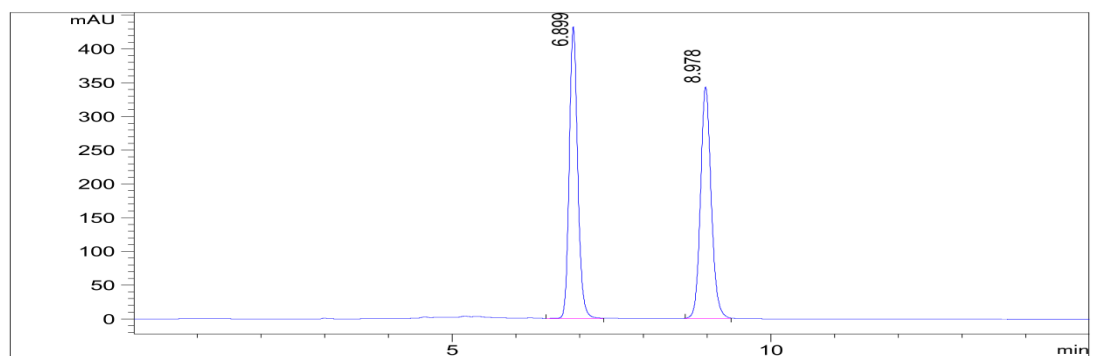

| # | Meas. RT [min] | Peak Type | Peak Height [mAU] | Peak Width [min] | Peak Area [mAU*s] | Peak Area % |
|---|----------------|-----------|-------------------|------------------|-------------------|-------------|
| 1 | 6.899          | MF        | 432.845           | 0.154            | 3993.943          | 49.795      |
| 2 | 8.978          | FM        | 343.579           | 0.195            | 4026.865          | 50.205      |

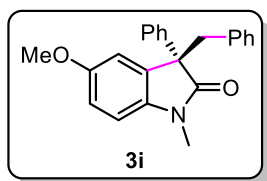

**(S)-3-benzyl-5-methoxy-1-methyl-3-phenylindolin-2-one (3i)**

Yield: 74% (25.4 mg), ee = 97%,  $[\alpha]_D^{18} = -40.0$  (c = 1.4, CHCl<sub>3</sub>), <sup>1</sup>H NMR (400 MHz, CDCl<sub>3</sub>) δ 7.49 (d, *J* = 7.2 Hz, 2H), 7.36 - 7.32 (m, 2H), 7.30 - 7.26 (m, 1H), 7.06 - 7.00 (m, 3H), 6.86 (dd, *J* = 7.2, 1.2 Hz, 2H), 6.79 (d, *J* = 2.4 Hz, 1H), 6.74 (dd, *J* = 8.4, 2.4 Hz, 1H), 6.51 (d, *J* = 8.4 Hz, 1H), 3.77 (s, 3H), 3.69 (d, *J* = 12.4 Hz, 1H), 3.45 (d, *J* = 12.8 Hz, 1H), 2.92 (s, 3H); <sup>13</sup>C NMR (101 MHz, CDCl<sub>3</sub>) δ 177.4, 155.6, 139.6, 137.3, 135.6, 132.5, 130.0, 128.6, 127.4, 127.2, 126.5, 112.8, 112.5, 108.2, 58.6, 55.8, 43.8, 26.1. HRMS (ESI) calcd. for C<sub>23</sub>H<sub>22</sub>NO<sub>2</sub> [M+H]<sup>+</sup>: 344.1645, found: 344.1644.

The ee of compound **3i** was determined by HPLC using an IC<sub>Daicel</sub> column (n-hexane/*i*-PrOH = 60/40, flow rate = 1.0 mL/min, λ = 254 nm, *t*<sub>major</sub> = 7.93 min, *t*<sub>minor</sub> = 14.32 min).

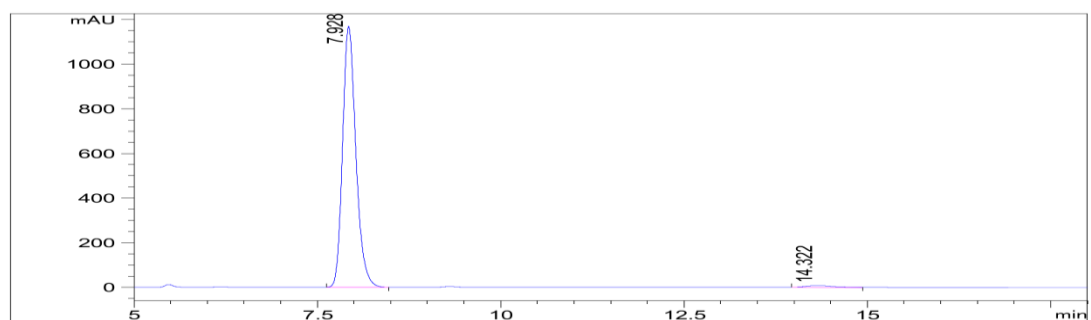

| # | Meas. RT [min] | Peak Type | Peak Height [mAU] | Peak Width [min] | Peak Area [mAU*s] | Peak Area % |
|---|----------------|-----------|-------------------|------------------|-------------------|-------------|
| 1 | 7.928          | MF        | 1169.367          | 0.210            | 14745.798         | 98.562      |
| 2 | 14.322         | MF        | 8.200             | 0.437            | 215.148           | 1.438       |

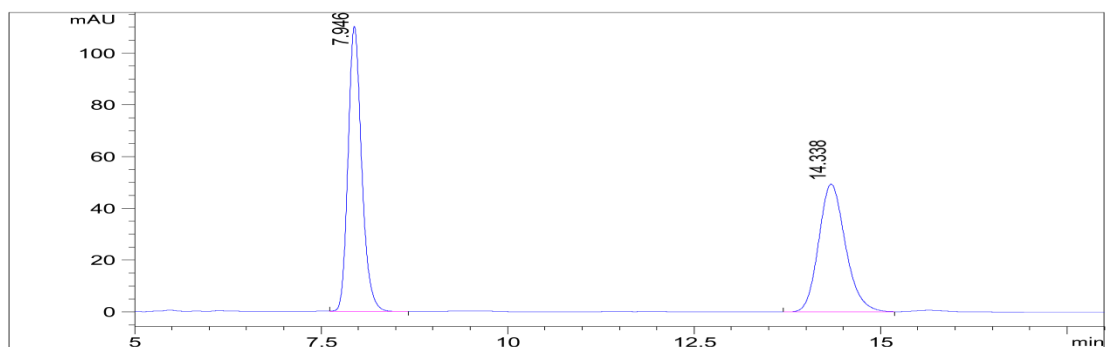

| # | Meas. RT [min] | Peak Type | Peak Height [mAU] | Peak Width [min] | Peak Area [mAU*s] | Peak Area % |
|---|----------------|-----------|-------------------|------------------|-------------------|-------------|
| 1 | 7.946          | MM        | 106.129           | 0.198            | 1259.153          | 50.440      |
| 2 | 14.338         | MF        | 49.402            | 0.417            | 1237.180          | 49.560      |

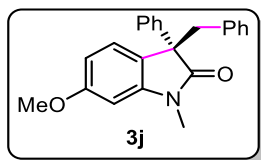

**(S)-3-benzyl-6-methoxy-1-methyl-3-phenylindolin-2-one (3j)**

Yield: 74% (25.4 mg), ee = 96%,  $[\alpha]_D^{18} = -69.7$  (c = 1.0, CHCl<sub>3</sub>), <sup>1</sup>H NMR (400 MHz, CDCl<sub>3</sub>) δ 7.50 (d, *J* = 7.6 Hz, 2H), 7.33 (t, *J* = 7.2 Hz, 2H), 7.28 (d, *J* = 7.2 Hz, 1H), 7.08 - 7.00 (m, 4H), 6.84 (dd, *J* = 7.6, 1.6 Hz, 2H), 6.58 (dd, *J* = 8.4, 2.4 Hz, 1H), 6.20 (d, *J* = 2.4 Hz, 1H), 3.80 (s, 3H), 3.65 (d, *J* = 12.8 Hz, 1H), 3.43 (d, *J* = 12.8 Hz, 1H), 2.92 (s, 3H); <sup>13</sup>C NMR (101 MHz, CDCl<sub>3</sub>) δ 178.3, 160.1, 144.9, 140.0, 135.9, 130.0, 128.5, 127.4, 127.3, 127.2, 126.4, 126.1, 123.0, 106.1, 95.8, 57.7, 55.4, 44.1, 26.0. HRMS (ESI) calcd. for C<sub>23</sub>H<sub>22</sub>NO<sub>2</sub> [M+H]<sup>+</sup>: 344.1645, found: 344.1643.

The ee of compound **3j** was determined by HPLC using an IC<sub>Daicel</sub> column (n-hexane/*i*-PrOH = 80/20, flow rate = 1.0 mL/min, λ = 254 nm, *t*<sub>major</sub> = 7.44 min, *t*<sub>minor</sub> = 11.85 min).

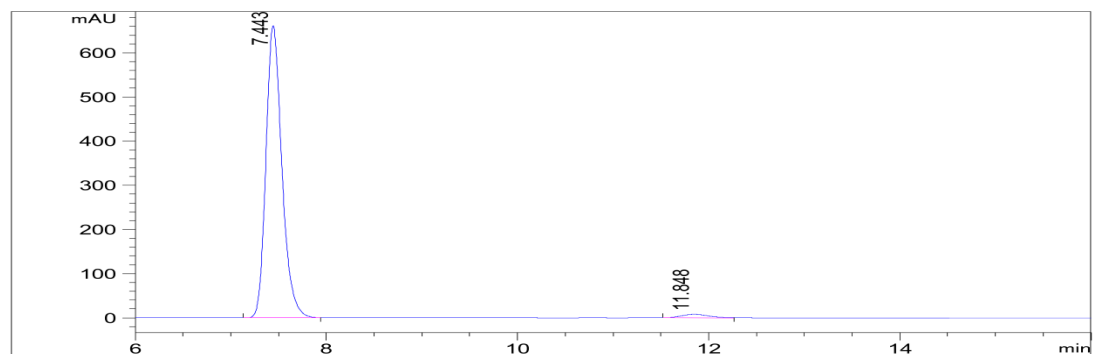

| # | Meas. RT [min] | Peak Type | Peak Height [mAU] | Peak Width [min] | Peak Area [mAU*s] | Peak Area % |
|---|----------------|-----------|-------------------|------------------|-------------------|-------------|
| 1 | 7.443          | MF        | 661.726           | 0.193            | 7676.477          | 98.066      |
| 2 | 11.848         | FM        | 7.726             | 0.327            | 151.411           | 1.934       |

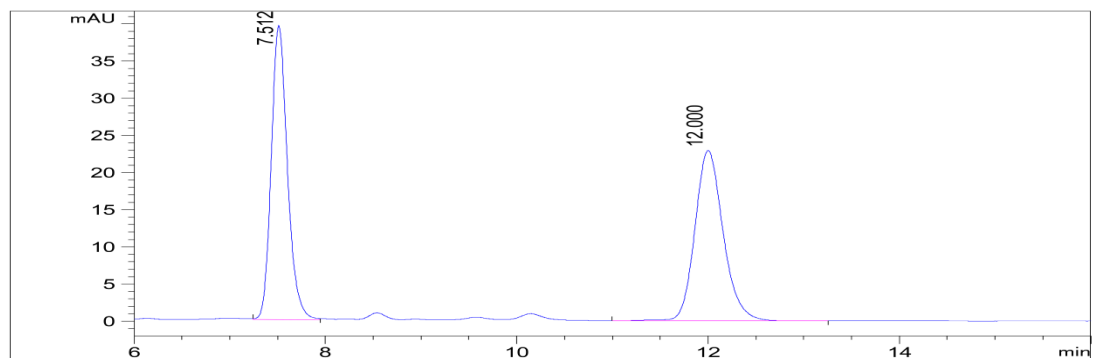

| # | Meas. RT [min] | Peak Type | Peak Height [mAU] | Peak Width [min] | Peak Area [mAU*s] | Peak Area % |
|---|----------------|-----------|-------------------|------------------|-------------------|-------------|
| 1 | 7.512          | MF        | 39.594            | 0.196            | 465.552           | 49.788      |
| 2 | 12.000         | BB        | 22.888            | 0.315            | 469.520           | 50.212      |

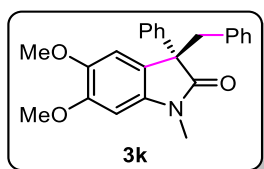

**(S)-3-benzyl-5,6-dimethoxy-1-methyl-3-phenylindolin-2-one (3k)**

Yield: 58% (21.6 mg), ee = 97%,  $[\alpha]_D^{18} = -63.5$  (c = 1.6, CHCl<sub>3</sub>), <sup>1</sup>H NMR (400 MHz, CDCl<sub>3</sub>) δ 7.48 (d, *J* = 7.6 Hz, 2H), 7.35 (t, *J* = 7.2 Hz, 2H), 7.29 (d, *J* = 6.8 Hz, 1H), 7.07 - 7.02 (m, 3H), 6.84 (dd, *J* = 7.6, 1.2 Hz, 2H), 6.70 (s, 1H), 6.27 (s, 1H), 3.87 (s, 3H), 3.82 (s, 3H), 3.62 (d, *J* = 12.8 Hz, 1H), 3.47 (d, *J* = 12.8 Hz, 1H), 2.96 (s, 3H); <sup>13</sup>C NMR (101 MHz, CDCl<sub>3</sub>) δ 178.1, 149.4, 144.6, 139.8, 137.6, 135.9, 130.0, 128.5, 127.5, 127.4, 127.3, 126.5, 121.5, 110.5, 93.8, 58.3, 56.8, 56.2, 43.8, 26.2. HRMS (ESI) calcd. for C<sub>24</sub>H<sub>24</sub>NO<sub>3</sub> [M+H]<sup>+</sup>: 374.1750, found: 374.1758.

The ee of compound **3k** was determined by HPLC using an IC<sub>Daicel</sub> column (n-hexane/*i*-PrOH = 60/40, flow rate = 1.0 mL/min, λ = 254 nm, *t*<sub>major</sub> = 9.19 min, *t*<sub>minor</sub> = 13.89 min).

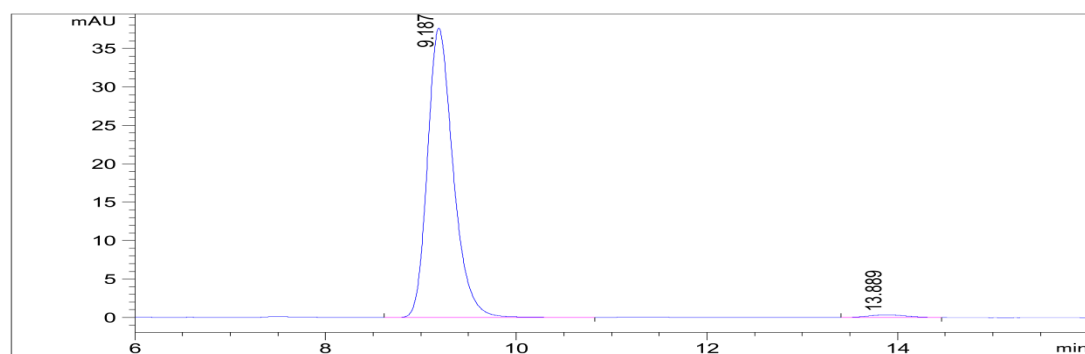

| # | Meas. RT [min] | Peak Type | Peak Height [mAU] | Peak Width [min] | Peak Area [mAU*s] | Peak Area % |
|---|----------------|-----------|-------------------|------------------|-------------------|-------------|
| 1 | 9.187          | BB        | 37.614            | 0.283            | 704.698           | 98.615      |
| 2 | 13.889         | MM        | 0.352             | 0.469            | 9.900             | 1.385       |

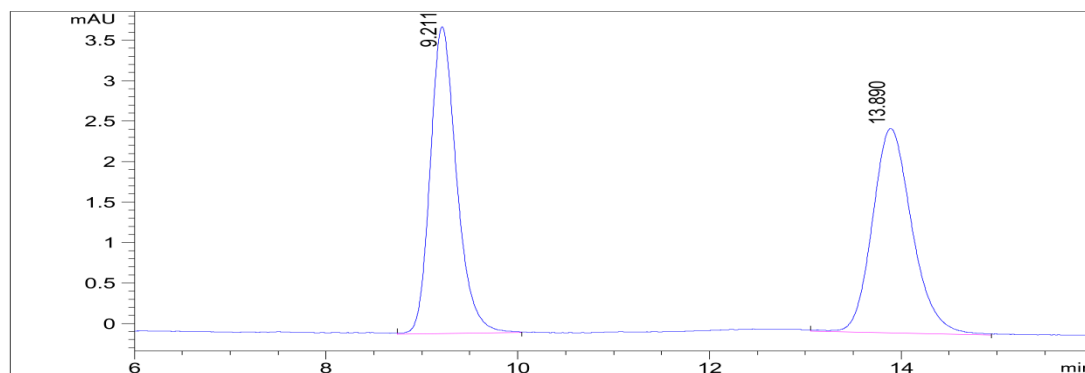

| # | Meas. RT [min] | Peak Type | Peak Height [mAU] | Peak Width [min] | Peak Area [mAU*s] | Peak Area % |
|---|----------------|-----------|-------------------|------------------|-------------------|-------------|
| 1 | 9.211          | MM        | 3.793             | 0.319            | 72.598            | 50.062      |
| 2 | 13.890         | MM        | 2.524             | 0.478            | 72.419            | 49.938      |

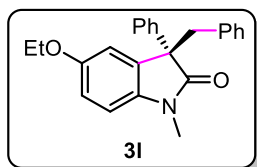

**(S)-3-benzyl-5-ethoxy-1-methyl-3-phenylindolin-2-one (3I)**

Yield: 63% (22.5 mg), ee = 97%,  $[\alpha]_D^{18} = -35.8$  (c = 1.2, CHCl<sub>3</sub>), <sup>1</sup>H NMR (400 MHz, CDCl<sub>3</sub>) δ 7.49 (d, *J* = 7.2 Hz, 2H), 7.34 (t, *J* = 7.2 Hz, 2H), 7.28 (d, *J* = 7.2 Hz, 1H), 7.03 (dd, *J* = 13.2, 6.0 Hz, 3H), 6.86 (dd, *J* = 7.6, 1.6 Hz, 2H), 6.81 (d, *J* = 2.4 Hz, 1H), 6.74 (dd, *J* = 8.8, 2.8 Hz, 1H), 6.50 (d, *J* = 8.4 Hz, 1H), 4.02 - 3.93 (m, 2H), 3.69 (d, *J* = 12.8 Hz, 1H), 3.43 (d, *J* = 12.8 Hz, 1H), 2.91 (s, 3H), 1.40 (t, *J* = 7.2 Hz, 3H); <sup>13</sup>C NMR (101 MHz, CDCl<sub>3</sub>) δ 177.5, 154.9, 139.7, 137.3, 135.7, 132.5, 130.0, 128.6, 127.4, 127.4, 127.2, 126.5, 113.5, 113.4, 108.3, 64.2, 58.7, 43.8, 26.1, 14.9. HRMS (ESI) calcd. for C<sub>24</sub>H<sub>24</sub>NO<sub>2</sub> [M+H]<sup>+</sup>: 358.1802, found: 358.1814.

The ee of compound **3I** was determined by HPLC using an IA<sub>Dai</sub>cel column (n-hexane/*i*-PrOH = 95/5, flow rate = 1.0 mL/min, λ = 254 nm, *t*<sub>major</sub> = 12.60 min, *t*<sub>minor</sub> = 16.21 min).

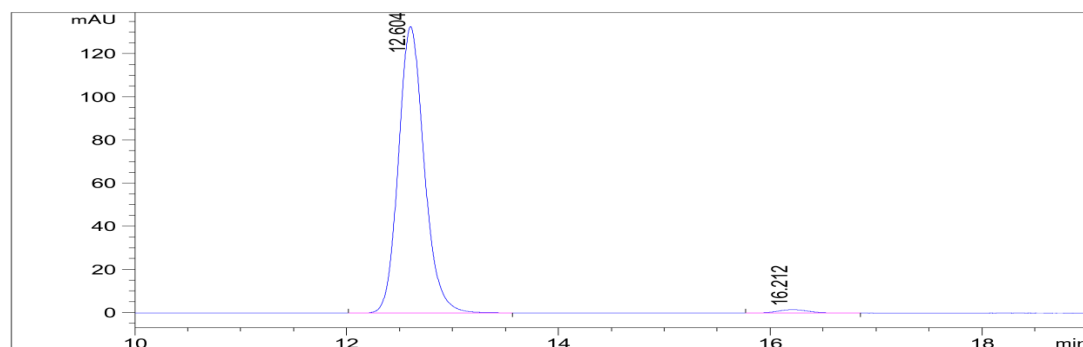

| # | Meas. RT [min] | Peak Type | Peak Height [mAU] | Peak Width [min] | Peak Area [mAU*s] | Peak Area % |
|---|----------------|-----------|-------------------|------------------|-------------------|-------------|
| 1 | 12.604         | MF        | 132.907           | 0.282            | 2248.198          | 98.584      |
| 2 | 16.212         | MM        | 1.583             | 0.340            | 32.299            | 1.416       |

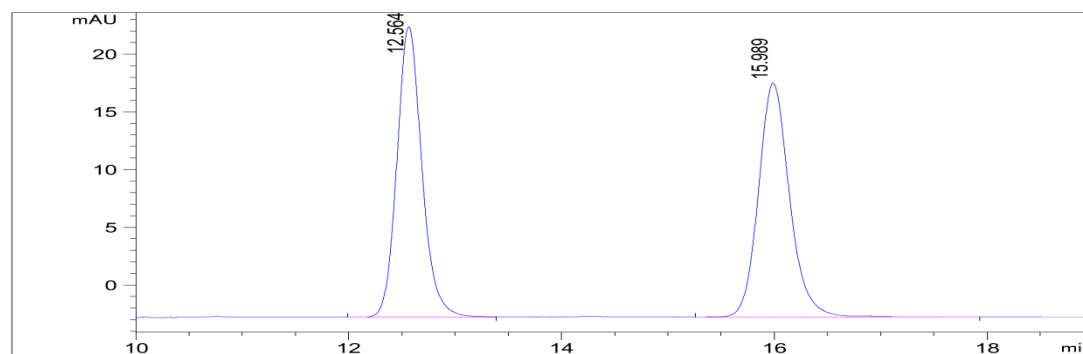

| # | Meas. RT [min] | Peak Type | Peak Height [mAU] | Peak Width [min] | Peak Area [mAU*s] | Peak Area % |
|---|----------------|-----------|-------------------|------------------|-------------------|-------------|
| 1 | 12.564         | MF        | 25.179            | 0.273            | 411.885           | 49.948      |
| 2 | 15.989         | VB        | 20.268            | 0.310            | 412.742           | 50.052      |

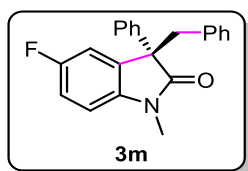

**(S)-3-benzyl-5-fluoro-1-methyl-3-phenylindolin-2-one (3m)**

Yield: 67% (22.2 mg), ee = 93%,  $[\alpha]_D^{18} = -69.1$  (c = 1.3, CHCl<sub>3</sub>), <sup>1</sup>H NMR (400 MHz, CDCl<sub>3</sub>) δ 7.47 (d, *J* = 7.2 Hz, 2H), 7.36 (t, *J* = 6.8 Hz, 2H), 7.30 (t, *J* = 7.2 Hz, 1H), 7.07 - 7.01 (m, 3H), 6.97 - 6.88 (m, 2H), 6.86 (dd, *J* = 7.2, 1.2 Hz, 2H), 6.52 (q, *J* = 4.4 Hz, 1H), 3.72 (d, *J* = 12.8 Hz, 1H), 3.43 (d, *J* = 12.8 Hz, 1H), 2.94 (s, 3H); <sup>13</sup>C NMR (101 MHz, CDCl<sub>3</sub>) δ 177.5, 158.9 (d, *J*<sub>CF</sub> = 238.9 Hz), 139.7, 139.1, 135.2, 133.0 (d, *J*<sub>CF</sub> = 7.9 Hz), 129.9, 128.7, 127.7, 127.5, 127.1, 126.7, 114.4 (d, *J*<sub>CF</sub> = 23.4 Hz), 113.4 (d, *J*<sub>CF</sub> = 24.6 Hz), 108.4 (d, *J*<sub>CF</sub> = 8.1 Hz), 58.7, 43.8, 26.2. HRMS (ESI) calcd. for C<sub>22</sub>H<sub>19</sub>FNO [M+H]<sup>+</sup>: 332.1445, found: 332.1445.

The ee of compound **3m** was determined by HPLC using an IA<sub>Dai</sub>cel column (n-hexane/*i*-PrOH = 90/10, flow rate = 1.0 mL/min, λ = 254 nm, *t*<sub>major</sub> = 7.54 min, *t*<sub>minor</sub> = 10.79 min).

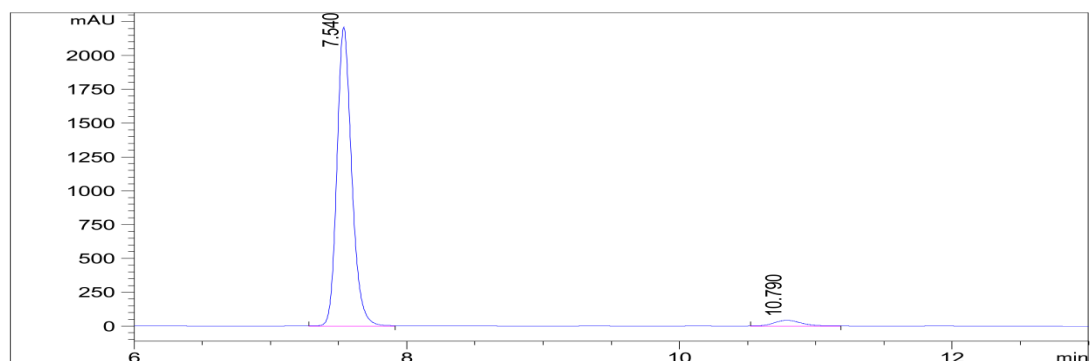

| # | Meas. RT [min] | Peak Type | Peak Height [mAU] | Peak Width [min] | Peak Area [mAU*s] | Peak Area % |
|---|----------------|-----------|-------------------|------------------|-------------------|-------------|
| 1 | 7.540          | MF        | 2215.010          | 0.126            | 16793.711         | 96.621      |
| 2 | 10.790         | MF        | 42.785            | 0.229            | 587.354           | 3.379       |

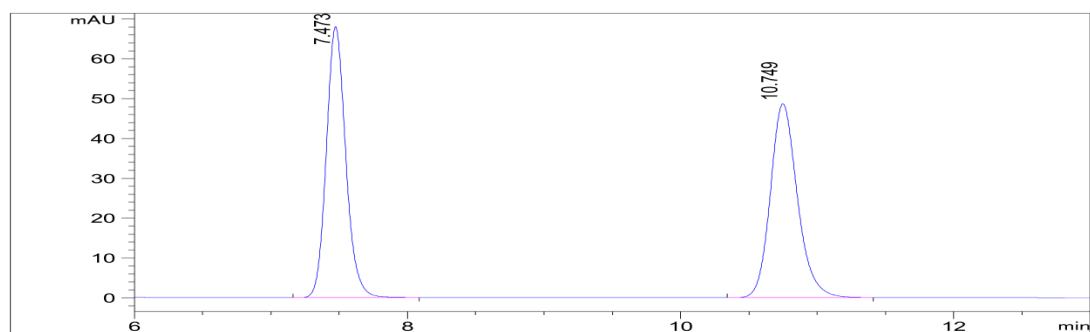

| # | Meas. RT [min] | Peak Type | Peak Height [mAU] | Peak Width [min] | Peak Area [mAU*s] | Peak Area % |
|---|----------------|-----------|-------------------|------------------|-------------------|-------------|
| 1 | 7.473          | MF        | 68.076            | 0.165            | 673.719           | 50.055      |
| 2 | 10.749         | MF        | 48.685            | 0.230            | 672.238           | 49.945      |



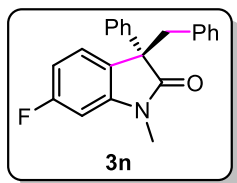

**(S)-3-benzyl-6-fluoro-1-methyl-3-phenylindolin-2-one (3n)**

Yield: 65% (21.5 mg), ee = 94%,  $[\alpha]_D^{18} = -85.9$  (c = 1.1, CHCl<sub>3</sub>), <sup>1</sup>H NMR (400 MHz, CDCl<sub>3</sub>) δ 7.47 (d, *J* = 7.6 Hz, 2H), 7.35 (t, *J* = 6.8 Hz, 2H), 7.31 - 7.27 (m, 1H), 7.13 (dd, *J* = 8.4, 5.6 Hz, 1H), 7.09 - 7.01 (m, 3H), 6.4 (d, *J* = 6.4 Hz, 2H), 6.78 - 6.73 (m, 1H), 6.35 (dd, *J* = 8.8, 2.0 Hz, 1H), 3.69 (d, *J* = 12.8 Hz, 1H), 3.42 (d, *J* = 12.8 Hz, 1H), 2.92 (s, 3H); <sup>13</sup>C NMR (101 MHz, CDCl<sub>3</sub>) δ 178.1, 163.0 (d, *J*<sub>CF</sub> = 243.6 Hz), 145.2 (d, *J*<sub>CF</sub> = 11.5 Hz), 139.4, 135.4, 129.9, 128.6, 127.5, 127.2, 127.1 (d, *J*<sub>CF</sub> = 92.2 Hz), 126.5, 126.4, 108.2 (d, *J*<sub>CF</sub> = 22.2 Hz), 96.7 (d, *J*<sub>CF</sub> = 27.3 Hz), 57.9, 44.0, 26.1. HRMS (ESI) calcd. for C<sub>22</sub>H<sub>19</sub>FNO [M+H]<sup>+</sup>: 332.1445, found: 332.1443.

The ee of compound **3n** was determined by HPLC using an IA<sub>Dai</sub>cel column (n-hexane/*i*-PrOH = 95/5, flow rate = 1.0 mL/min, λ = 254 nm, *t*<sub>major</sub> = 10.63 min, *t*<sub>minor</sub> = 13.53 min).

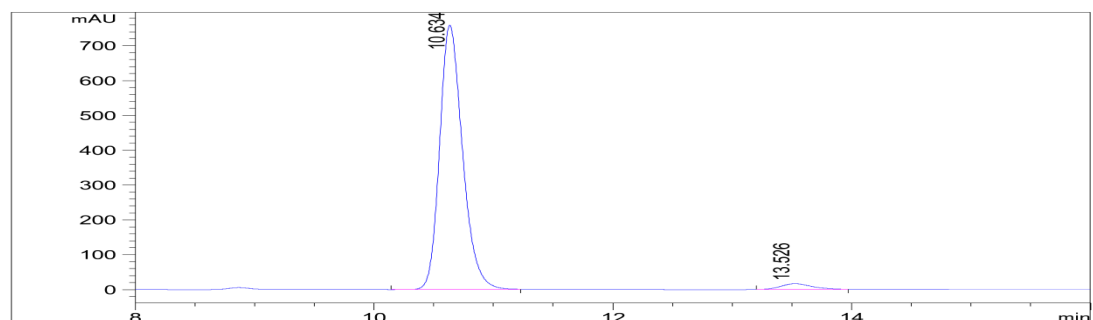

| # | Meas. RT [min] | Peak Type | Peak Height [mAU] | Peak Width [min] | Peak Area [mAU*s] | Peak Area % |
|---|----------------|-----------|-------------------|------------------|-------------------|-------------|
| 1 | 10.634         | MF        | 759.276           | 0.222            | 10123.767         | 97.040      |
| 2 | 13.526         | MF        | 16.731            | 0.308            | 308.802           | 2.960       |

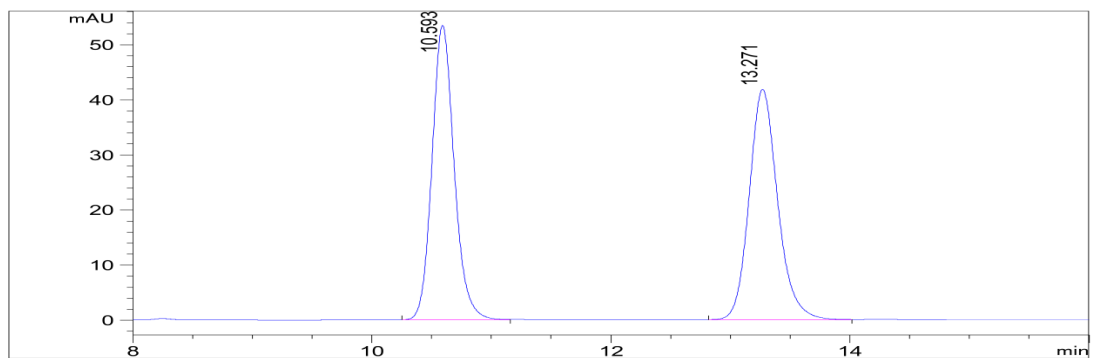

| # | Meas. RT [min] | Peak Type | Peak Height [mAU] | Peak Width [min] | Peak Area [mAU*s] | Peak Area % |
|---|----------------|-----------|-------------------|------------------|-------------------|-------------|
| 1 | 10.593         | MF        | 53.486            | 0.215            | 690.741           | 49.823      |
| 2 | 13.271         | MF        | 41.864            | 0.277            | 695.642           | 50.177      |

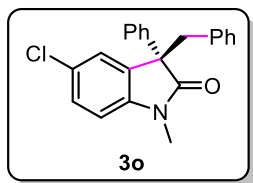

**(S)-3-benzyl-5-chloro-1-methyl-3-phenylindolin-2-one (3o)**

Yield: 55% (19.1 mg), ee = 95%,  $[\alpha]_D^{19} = -17.0$  (c = 1.0, CHCl<sub>3</sub>), <sup>1</sup>H NMR (400 MHz, CDCl<sub>3</sub>) δ 7.45 (d, *J* = 6.0 Hz, 2H), 7.36 - 7.30 (m, 3H), 7.18 (s, 2H), 7.05 (s, 3H), 6.85 (s, 2H), 6.51 (d, *J* = 7.2 Hz, 1H), 3.71 (d, *J* = 12.8 Hz, 1H), 3.43 (d, *J* = 12.4 Hz, 1H), 2.92 (s, 3H); <sup>13</sup>C NMR (101 MHz, CDCl<sub>3</sub>) δ 177.3, 142.3, 139.0, 135.1, 133.2, 129.9, 128.7, 128.1, 127.7, 127.5, 127.1, 126.7, 125.6, 108.9, 58.5, 43.8, 26.1. HRMS (ESI) calcd. for C<sub>22</sub>H<sub>19</sub>ClNO [M+H]<sup>+</sup>: 348.1150, found: 348.1149.

The ee of compound **3o** was determined by HPLC using an IA<sub>Daicel</sub> column (n-hexane/i-PrOH = 95/5, flow rate = 1.0 mL/min, λ = 254 nm, *t*<sub>major</sub> = 10.92 min, *t*<sub>minor</sub> = 17.15 min).

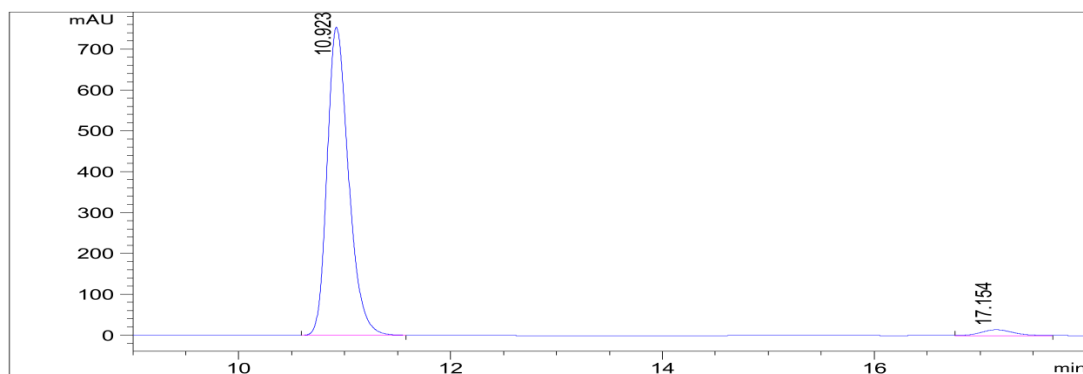

| # | Meas. RT [min] | Peak Type | Peak Height [mAU] | Peak Width [min] | Peak Area [mAU*s] | Peak Area % |
|---|----------------|-----------|-------------------|------------------|-------------------|-------------|
| 1 | 10.923         | MF        | 754.395           | 0.235            | 10641.728         | 97.254      |
| 2 | 17.154         | MF        | 14.392            | 0.348            | 300.525           | 2.746       |

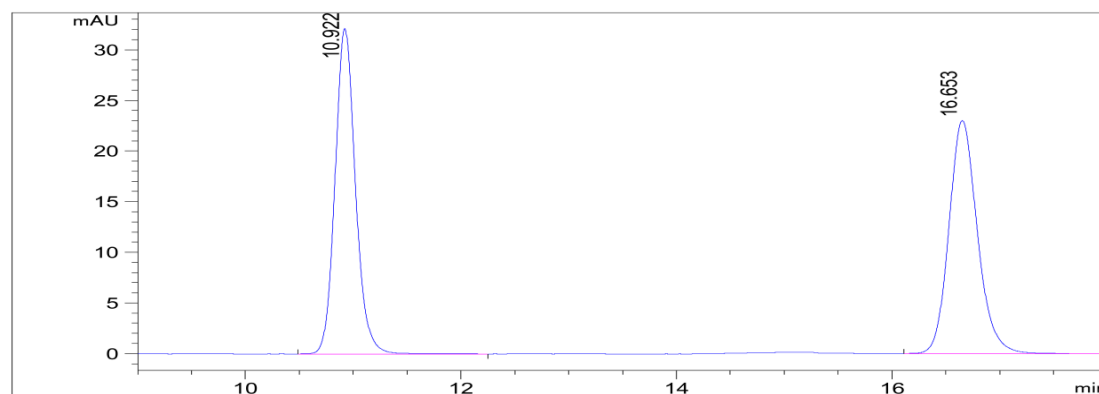

| # | Meas. RT [min] | Peak Type | Peak Height [mAU] | Peak Width [min] | Peak Area [mAU*s] | Peak Area % |
|---|----------------|-----------|-------------------|------------------|-------------------|-------------|
| 1 | 10.922         | BB        | 32.079            | 0.202            | 423.115           | 50.065      |
| 2 | 16.653         | BBA       | 22.973            | 0.282            | 422.024           | 49.935      |

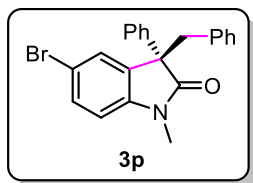

**(S)-3-benzyl-5-bromo-1-methyl-3-phenylindolin-2-one (3p)**

Yield: 50% (19.6 mg), ee = 95%,  $[\alpha]_D^{27} = -18.5$  (c = 2.8, CHCl<sub>3</sub>), <sup>1</sup>H NMR (400 MHz, ) δ 7.46 - 7.44 (m, 2H), 7.39 - 7.31 (m, 5H), 7.08 - 7.03 (m, 3H), 6.84 (dd, *J* = 6.8, 1.2 Hz, 2H), 6.48 (d, *J* = 8.0 Hz, 1H), 3.70 (d, *J* = 12.8 Hz, 1H), 3.43 (d, *J* = 12.8 Hz, 1H), 2.92 (s, 3H); <sup>13</sup>C NMR (101 MHz, CDCl<sub>3</sub>), δ 177.2, 142.7, 138.9, 135.1, 133.5, 131.0, 129.9, 128.7, 128.4, 127.7, 127.5, 127.1, 126.7, 114.8, 109.4, 58.5, 43.7, 26.1. HRMS (ESI) calcd. for C<sub>22</sub>H<sub>18</sub>BrNNaO [M+Na]<sup>+</sup>: 414.0464, found: 414.0466.

The ee of compound **3p** was determined by HPLC using an IA<sub>Dai</sub>cel column (n-hexane/*i*-PrOH = 90/10, flow rate = 1.0 mL/min, λ = 254 nm, *t*<sub>major</sub> = 7.84 min, *t*<sub>minor</sub> = 11.67 min).

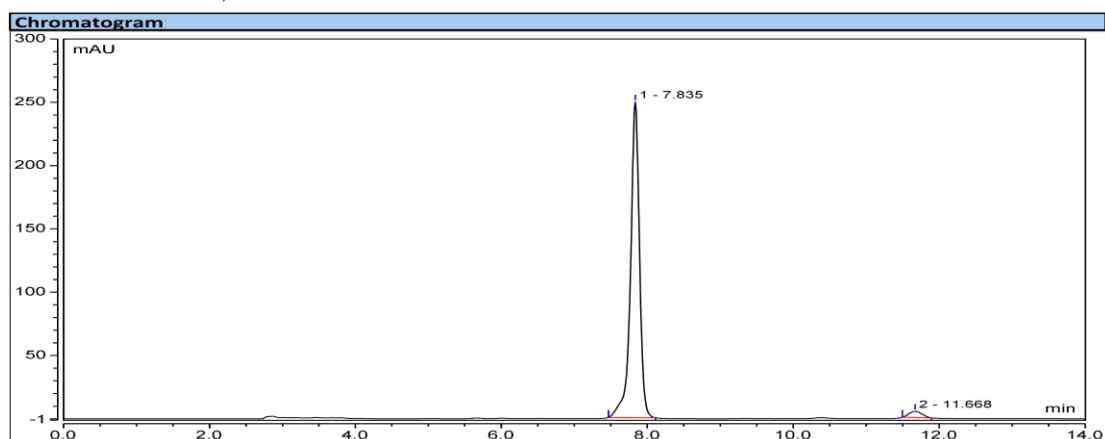

**Integration Results**

| No. | Peak Name | Retention Time (min) | Area (mAU*min) | Height (mAU) | Relative Area (%) | Relative Height (%) |
|-----|-----------|----------------------|----------------|--------------|-------------------|---------------------|
| 1   |           | 7.835                | 35.518         | 249.323      | 97.30             | 98.10               |
| 2   |           | 11.668               | 0.985          | 4.822        | 2.70              | 1.90                |

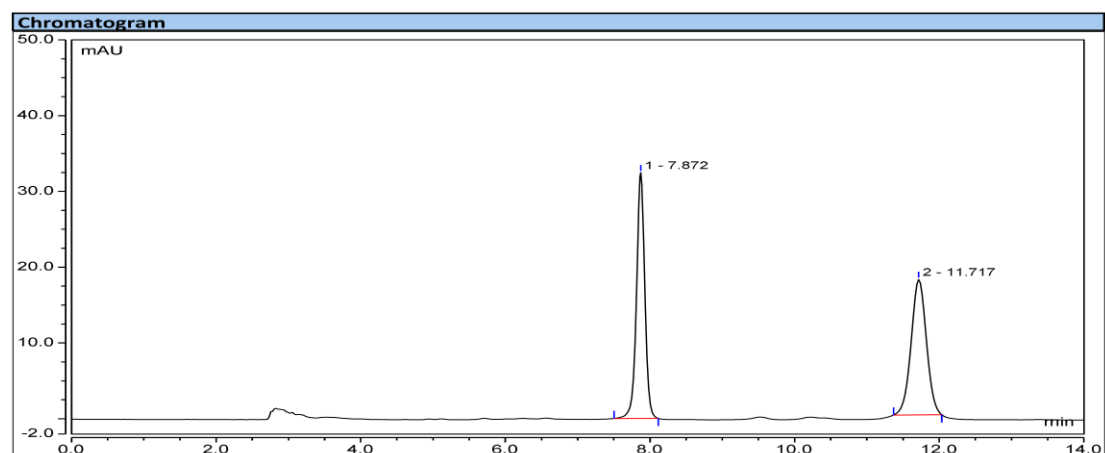

**Integration Results**

| No. | Peak Name | Retention Time (min) | Area (mAU*min) | Height (mAU) | Relative Area (%) | Relative Height (%) |
|-----|-----------|----------------------|----------------|--------------|-------------------|---------------------|
| 1   |           | 7.872                | 4.289          | 32.439       | 49.58             | 64.47               |
| 2   |           | 11.717               | 4.362          | 17.878       | 50.42             | 35.53               |

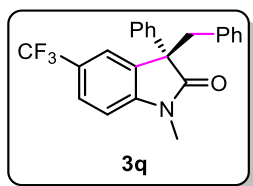

**(S)-3-benzyl-1-methyl-3-phenyl-5-(trifluoromethyl)indolin-2-one (3q)**

Yield: 71% (27.1 mg), ee = 92%,  $[\alpha]_D^{18} = -24.2$  (c = 1.0, CHCl<sub>3</sub>), <sup>1</sup>H NMR (400 MHz, CDCl<sub>3</sub>) δ 7.50 - 7.42 (m, 4H), 7.39 - 7.35 (m, 2H), 7.34 - 7.30 (m, 1H), 7.08 - 7.00 (m, 3H), 6.79 (d, *J* = 6.8 Hz, 2H), 6.66 (d, *J* = 8.0 Hz, 1H), 3.73 (d, *J* = 12.8 Hz, 1H), 3.47 (d, *J* = 12.8 Hz, 1H), 2.98 (s, 3H); <sup>13</sup>C NMR (101 MHz, CDCl<sub>3</sub>) δ 177.8, 146.7, 138.6, 135.0, 131.9, 129.8, 128.8, 127.8, 127.6, 127.1, 126.8, 125.9 (q, *J*<sub>CF</sub> = 4.0 Hz), 124.2, 122.5 (q, *J*<sub>CF</sub> = 3.7 Hz), 107.7, 58.3, 44.0, 26.2. HRMS (ESI) calcd. for C<sub>23</sub>H<sub>19</sub>F<sub>3</sub>NO [M+H]<sup>+</sup>: 382.1413, found: 382.1413.

The ee of compound **3q** was determined by HPLC using an IA<sub>Daicel</sub> column (n-hexane/*i*-PrOH = 95/5, flow rate = 1.0 mL/min, λ = 254 nm, *t*<sub>major</sub> = 7.87 min, *t*<sub>minor</sub> = 11.28 min).

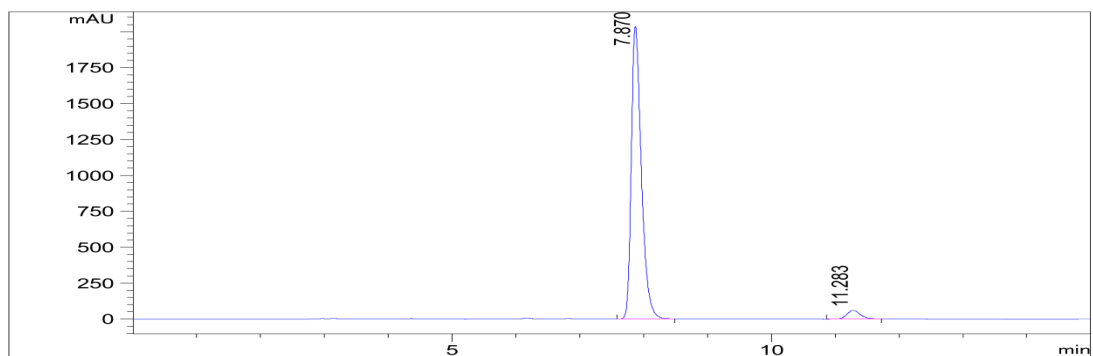

| # | Meas. RT [min] | Peak Type | Peak Height [mAU] | Peak Width [min] | Peak Area [mAU*s] | Peak Area % |
|---|----------------|-----------|-------------------|------------------|-------------------|-------------|
| 1 | 7.870          | FM        | 2038.909          | 0.182            | 22306.992         | 96.142      |
| 2 | 11.283         | MF        | 60.770            | 0.245            | 895.108           | 3.858       |

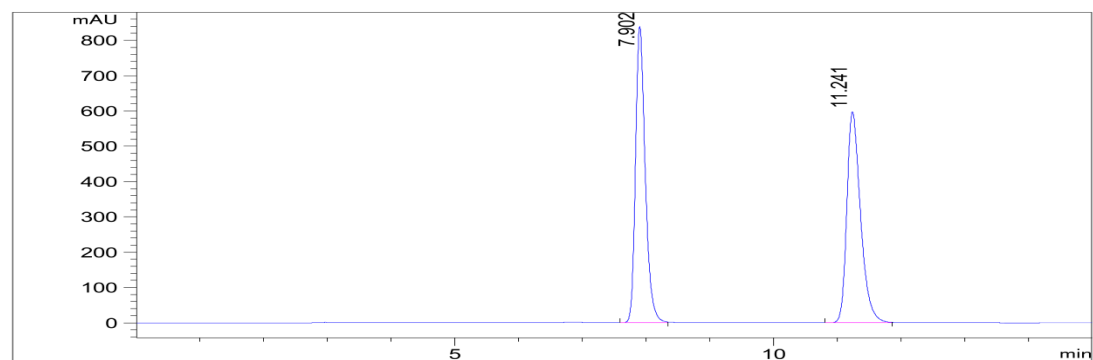

| # | Meas. RT [min] | Peak Type | Peak Height [mAU] | Peak Width [min] | Peak Area [mAU*s] | Peak Area % |
|---|----------------|-----------|-------------------|------------------|-------------------|-------------|
| 1 | 7.902          | FM        | 837.978           | 0.177            | 8893.450          | 49.898      |
| 2 | 11.241         | MF        | 597.844           | 0.249            | 8929.662          | 50.102      |

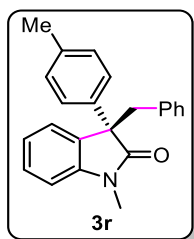

**(S)-3-benzyl-1-methyl-3-(p-tolyl)indolin-2-one (3r)**

Yield: 70% (22.9 mg), ee = 93%,  $[\alpha]_D^{18} = -99.7$  (c = 0.9, CHCl<sub>3</sub>), <sup>1</sup>H NMR (400 MHz, CDCl<sub>3</sub>) δ 7.37 (d, *J* = 8.4 Hz, 2H), 7.21 - 7.18 (m, 2H), 7.14 (d, *J* = 8.0 Hz, 2H), 7.08 - 6.98 (m, 4H), 6.83 (dd, *J* = 7.6, 1.2 Hz, 2H), 6.60 (d, *J* = 7.6 Hz, 1H), 3.70 (d, *J* = 12.4 Hz, 1H), 3.42 (d, *J* = 12.8 Hz, 1H), 2.93 (s, 3H), 2.32 (s, 3H); <sup>13</sup>C NMR (101 MHz, CDCl<sub>3</sub>) δ 177.9, 143.7, 137.1, 136.7, 135.7, 131.4, 130.0, 129.2, 128.0, 127.4, 127.1, 126.4, 125.4, 122.1, 107.9, 58.0, 43.9, 26.0, 21.0. HRMS (ESI) calcd. for C<sub>23</sub>H<sub>21</sub>NNaO [M+Na]<sup>+</sup>: 350.1515, found: 350.1520.

The ee of compound **3r** was determined by HPLC using an IADaice column (n-hexane/*i*-PrOH = 95/5, flow rate = 1.0 mL/min, λ = 254 nm, *t*<sub>major</sub> = 10.46 min, *t*<sub>minor</sub> = 16.30 min).

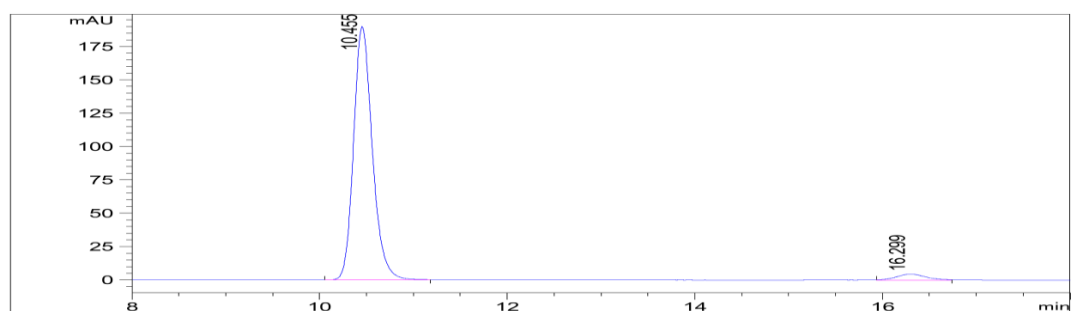

| # | Meas. RT [min] | Peak Type | Peak Height [mAU] | Peak Width [min] | Peak Area [mAU*s] | Peak Area % |
|---|----------------|-----------|-------------------|------------------|-------------------|-------------|
| 1 | 10.455         | FM        | 190.006           | 0.232            | 2641.245          | 96.660      |
| 2 | 16.299         | FM        | 4.352             | 0.349            | 91.259            | 3.340       |

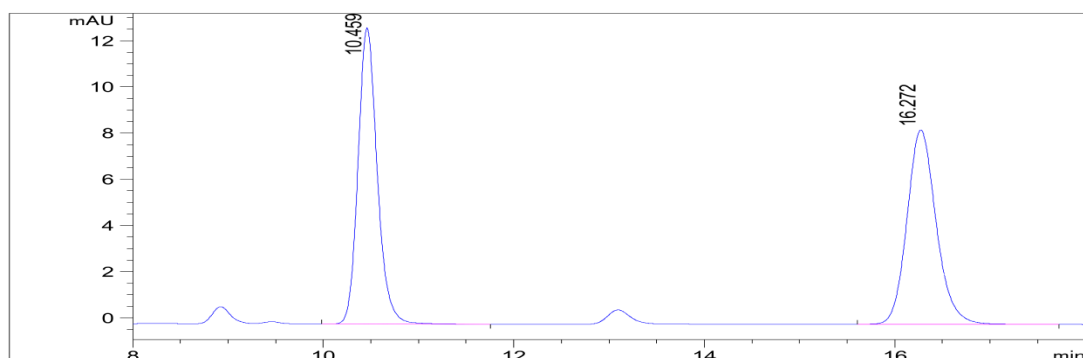

| # | Meas. RT [min] | Peak Type | Peak Height [mAU] | Peak Width [min] | Peak Area [mAU*s] | Peak Area % |
|---|----------------|-----------|-------------------|------------------|-------------------|-------------|
| 1 | 10.459         | BB        | 12.804            | 0.216            | 179.481           | 49.983      |
| 2 | 16.272         | BB        | 8.413             | 0.329            | 179.601           | 50.017      |

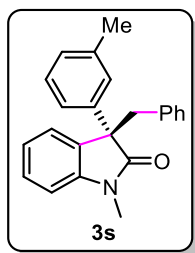

### (S)-3-benzyl-1-methyl-3-(m-tolyl)indolin-2-one (3s)

Yield: 69% (22.6 mg), ee = 92%,  $[\alpha]_D^{18} = -71.9$  (c = 0.8,  $\text{CHCl}_3$ ),  $^1\text{H NMR}$  (400 MHz,  $\text{CDCl}_3$ )  $\delta$  7.30 (s, 1H), 7.27 - 7.25 (m, 1H), 7.24 - 7.18 (m, 3H), 7.09 (t,  $J = 6.4$  Hz, 2H), 7.05 - 6.98 (m, 3H), 6.83 (d,  $J = 6.8$  Hz, 2H), 6.59 (d,  $J = 7.6$  Hz, 1H), 3.71 (d,  $J = 12.4$  Hz, 1H), 3.44 (d,  $J = 12.4$  Hz, 1H), 2.93 (s, 3H), 2.34 (s, 3H);  $^{13}\text{C NMR}$  (101 MHz,  $\text{CDCl}_3$ )  $\delta$  177.8, 143.7, 139.7, 138.2, 135.7, 131.5, 130.0, 128.4, 128.2, 128.2, 127.8, 127.3, 126.4, 125.3, 124.2, 122.1, 107.9, 58.2, 43.8, 26.0, 21.6. HRMS (ESI) calcd. for  $\text{C}_{23}\text{H}_{22}\text{NO}$   $[\text{M}+\text{H}]^+$ : 328.1696, found: 328.1707.

The ee of compound **3s** was determined by HPLC using an IA<sub>Daiacel</sub> column (n-hexane/*i*-PrOH = 95/5, flow rate = 1.0 mL/min,  $\lambda = 254$  nm,  $t_{\text{major}} = 8.72$  min,  $t_{\text{minor}} = 9.99$  min).

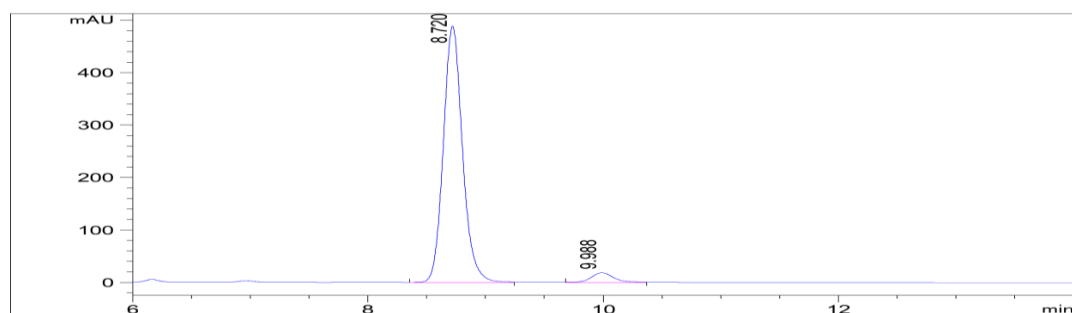

| # | Meas. RT [min] | Peak Type | Peak Height [mAU] | Peak Width [min] | Peak Area [mAU*s] | Peak Area % |
|---|----------------|-----------|-------------------|------------------|-------------------|-------------|
| 1 | 8.720          | MF        | 489.277           | 0.188            | 5523.569          | 95.870      |
| 2 | 9.988          | MF        | 18.333            | 0.216            | 237.979           | 4.130       |

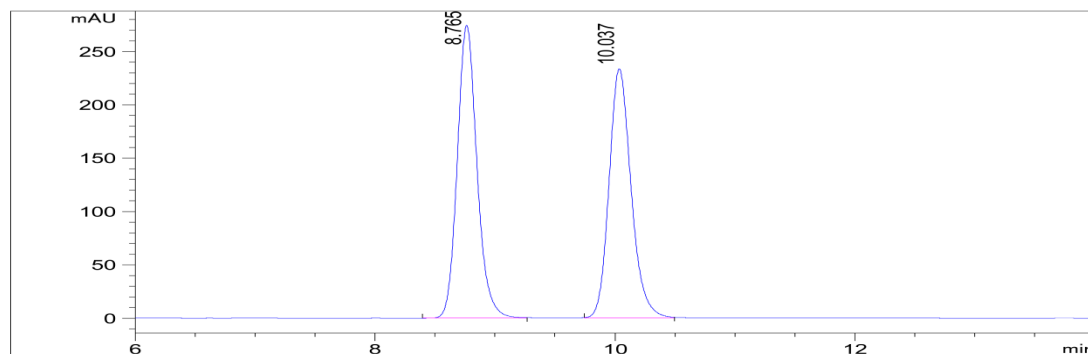

| # | Meas. RT [min] | Peak Type | Peak Height [mAU] | Peak Width [min] | Peak Area [mAU*s] | Peak Area % |
|---|----------------|-----------|-------------------|------------------|-------------------|-------------|
| 1 | 8.765          | MF        | 274.619           | 0.190            | 3133.837          | 51.206      |
| 2 | 10.037         | FM        | 233.828           | 0.213            | 2986.164          | 48.794      |

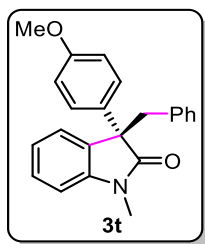

**(S)-3-benzyl-3-(4-methoxyphenyl)-1-methylindolin-2-one (3t)**

Yield: 67% (23.0 mg), ee = 89%,  $[\alpha]_D^{18} = -21.5$  (c = 1.0, CHCl<sub>3</sub>), <sup>1</sup>H NMR (400 MHz, CDCl<sub>3</sub>) δ 7.42 (d, *J* = 8.8 Hz, 2H), 7.23 - 7.18 (m, 2H), 7.08 - 6.98 (m, 4H), 6.87 (d, *J* = 8.8 Hz, 2H), 6.83 (d, *J* = 6.4 Hz, 2H), 6.61 (d, *J* = 7.6 Hz, 1H), 3.79 (s, 3H), 3.67 (d, *J* = 12.8 Hz, 1H), 3.41 (d, *J* = 12.8 Hz, 1H), 2.94 (s, 3H); <sup>13</sup>C NMR (101 MHz, CDCl<sub>3</sub>) δ 178.0, 158.8, 143.7, 135.7, 131.7, 131.3, 130.0, 128.4, 128.1, 127.4, 126.4, 125.4, 122.1, 113.9, 108.0, 57.5, 55.3, 44.1, 26.0. HRMS (ESI) calcd. for C<sub>23</sub>H<sub>22</sub>NO<sub>2</sub> [M+H]<sup>+</sup>: 344.1645, found: 344.1651.

The ee of compound **3t** was determined by HPLC using an IA<sub>Daicel</sub> column (n-hexane/*i*-PrOH = 80/20, flow rate = 1.0 mL/min, λ = 254 nm, *t*<sub>major</sub> = 6.95 min, *t*<sub>minor</sub> = 11.62 min).

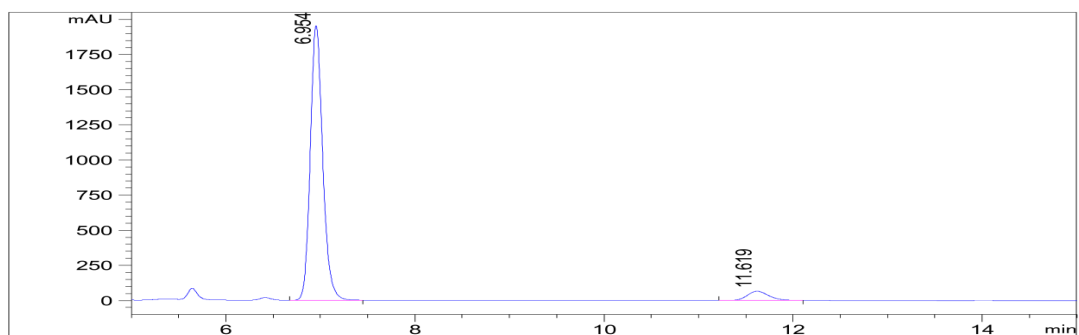

| # | Meas. RT [min] | Peak Type | Peak Height [mAU] | Peak Width [min] | Peak Area [mAU*s] | Peak Area % |
|---|----------------|-----------|-------------------|------------------|-------------------|-------------|
| 1 | 6.954          | MF        | 1956.477          | 0.152            | 17899.309         | 94.503      |
| 2 | 11.619         | MF        | 65.328            | 0.266            | 1041.067          | 5.497       |

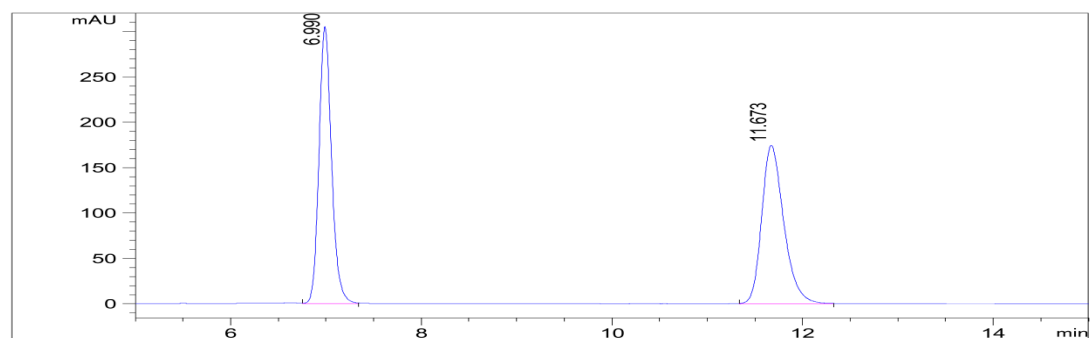

| # | Meas. RT [min] | Peak Type | Peak Height [mAU] | Peak Width [min] | Peak Area [mAU*s] | Peak Area % |
|---|----------------|-----------|-------------------|------------------|-------------------|-------------|
| 1 | 6.990          | MF        | 305.624           | 0.153            | 2804.749          | 49.841      |
| 2 | 11.673         | FM        | 174.713           | 0.269            | 2822.661          | 50.159      |

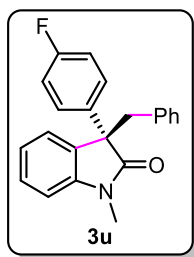

**(S)-3-benzyl-3-(4-fluorophenyl)-1-methylindolin-2-one (3u)**

Yield: 70% (23.3 mg), ee = 90%,  $[\alpha]_D^{18} = -104.2$  (c = 0.6, CHCl<sub>3</sub>), <sup>1</sup>H NMR (400 MHz, CDCl<sub>3</sub>) δ 7.50 - 7.47 (m, 2H), 7.25 - 7.18 (m, 2H), 7.10 - 6.99 (m, 6H), 6.81 (d, *J* = 6.8 Hz, 2H), 6.62 (d, *J* = 7.6 Hz, 1H), 3.65 (d, *J* = 12.8 Hz, 1H), 3.41 (d, *J* = 12.8 Hz, 1H), 2.95 (s, 3H); <sup>13</sup>C NMR (101 MHz, CDCl<sub>3</sub>) δ 177.6, 162.1 (d, *J*<sub>CF</sub> = 245.0 Hz), 143.7, 135.4, 130.8, 129.9, 129.0 (d, *J*<sub>CF</sub> = 8.0 Hz), 128.3, 127.4, 126.6, 125.5, 122.2, 115.3 (d, *J*<sub>CF</sub> = 21.2 Hz), 108.1, 57.6, 44.3, 26.1. HRMS (ESI) calcd. for C<sub>22</sub>H<sub>19</sub>FNO [M+H]<sup>+</sup>: 332.1445, found: 332.1458.

The ee of compound **3u** was determined by HPLC using an IC<sub>Daicel</sub> column (n-hexane/*i*-PrOH = 80/20, flow rate = 1.0 mL/min, λ = 254 nm, *t*<sub>major</sub> = 6.21 min, *t*<sub>minor</sub> = 8.81 min).

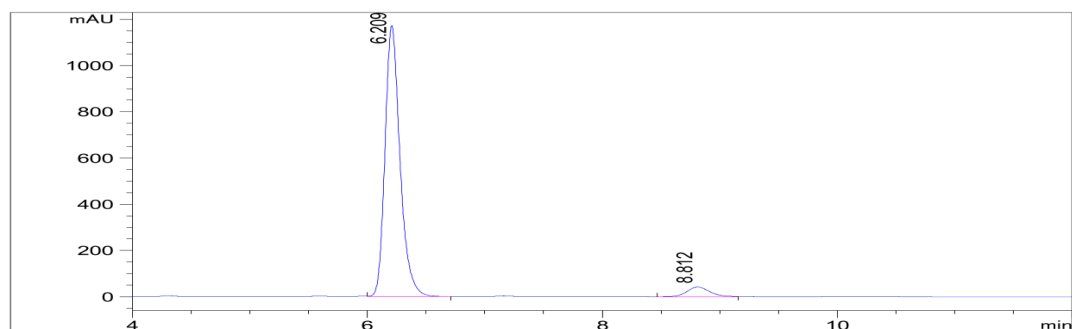

| # | Meas. RT [min] | Peak Type | Peak Height [mAU] | Peak Width [min] | Peak Area [mAU*s] | Peak Area % |
|---|----------------|-----------|-------------------|------------------|-------------------|-------------|
| 1 | 6.209          | FM        | 1172.506          | 0.148            | 10432.102         | 94.881      |
| 2 | 8.812          | MF        | 42.180            | 0.222            | 562.813           | 5.119       |

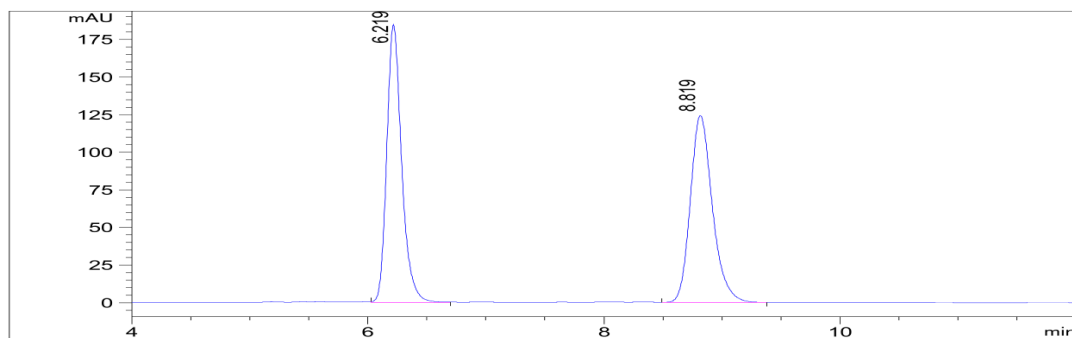

| # | Meas. RT [min] | Peak Type | Peak Height [mAU] | Peak Width [min] | Peak Area [mAU*s] | Peak Area % |
|---|----------------|-----------|-------------------|------------------|-------------------|-------------|
| 1 | 6.219          | MF        | 184.621           | 0.146            | 1613.229          | 49.961      |
| 2 | 8.819          | MF        | 124.315           | 0.217            | 1615.737          | 50.039      |



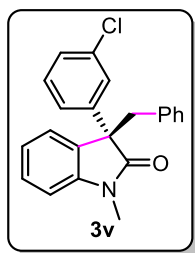

**(S)-3-benzyl-3-(3-chlorophenyl)-1-methylindolin-2-one (3v)**

Yield: 63% (21.8 mg), ee = 84%,  $[\alpha]_D^{18} = -69.5$  ( $c = 0.8$ ,  $\text{CHCl}_3$ ),  $^1\text{H NMR}$  (400 MHz,  $\text{CDCl}_3$ )  $\delta$  7.47 (s, 1H), 7.42 - 7.40 (m, 1H), 7.28 - 7.27 (m, 2H), 7.25 - 7.19 (m, 2H), 7.11 - 7.00 (m, 4H), 6.81 (d,  $J = 6.4$  Hz, 2H), 6.62 (d,  $J = 8.0$  Hz, 1H), 3.66 (d,  $J = 12.8$  Hz, 1H), 3.41 (d,  $J = 12.4$  Hz, 1H), 2.95 (s, 3H);  $^{13}\text{C NMR}$  (101 MHz,  $\text{CDCl}_3$ )  $\delta$  177.1, 143.6, 141.7, 135.2, 134.4, 130.5, 129.9, 129.8, 128.4, 127.6, 127.5, 127.4, 126.6, 125.6, 125.4, 122.4, 108.2, 58.0, 44.0, 26.1. HRMS (ESI) calcd. for  $\text{C}_{22}\text{H}_{19}\text{ClNO}$   $[\text{M}+\text{H}]^+$ : 348.1150, found: 348.1161.

The ee of compound **3v** was determined by HPLC using an  $\text{IA}_{\text{Daicel}}$  column (n-hexane/*i*-PrOH = 95/5, flow rate = 1.0 mL/min,  $\lambda = 254$  nm,  $t_{\text{major}} = 9.64$  min,  $t_{\text{minor}} = 11.74$  min).

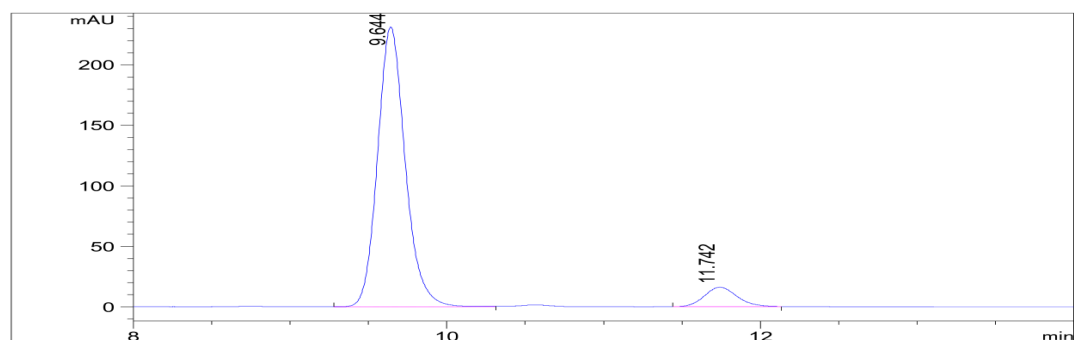

| # | Meas. RT [min] | Peak Type | Peak Height [mAU] | Peak Width [min] | Peak Area [mAU*s] | Peak Area % |
|---|----------------|-----------|-------------------|------------------|-------------------|-------------|
| 1 | 9.644          | MM        | 231.484           | 0.205            | 2842.866          | 92.244      |
| 2 | 11.742         | FM        | 16.253            | 0.245            | 239.040           | 7.756       |

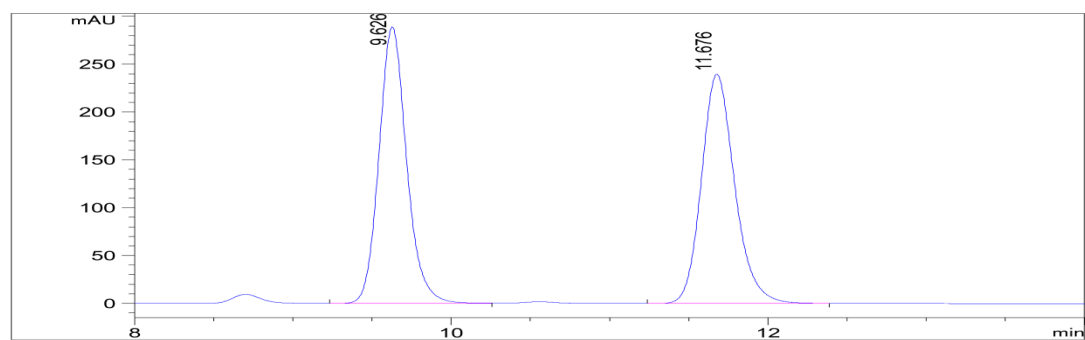

| # | Meas. RT [min] | Peak Type | Peak Height [mAU] | Peak Width [min] | Peak Area [mAU*s] | Peak Area % |
|---|----------------|-----------|-------------------|------------------|-------------------|-------------|
| 1 | 9.626          | MF        | 289.118           | 0.203            | 3515.545          | 50.087      |
| 2 | 11.676         | MF        | 239.708           | 0.244            | 3503.372          | 49.913      |

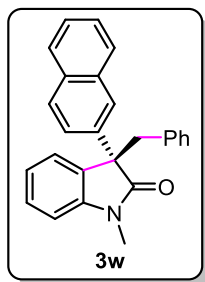

**(S)-3-benzyl-1-methyl-3-(naphthalen-2-yl)indolin-2-one (3w)**

Yield: 65% (23.6 mg), ee = 90%,  $[\alpha]_D^{18} = -99.6$  (c = 0.7, CHCl<sub>3</sub>), <sup>1</sup>H NMR (400 MHz, CDCl<sub>3</sub>) δ 7.91 (d, *J* = 2.0 Hz, 1H), 7.83 - 7.79 (m, 3H), 7.60 (dd, *J* = 8.4, 2.0 Hz, 1H), 7.48 - 7.44 (m, 2H), 7.26 - 7.22 (m, 2H), 7.11 - 7.00 (m, 4H), 6.86 (dd, *J* = 8.0, 1.2 Hz, 2H), 6.64 (d, *J* = 7.6 Hz, 1H), 3.82 (d, *J* = 12.8 Hz, 1H), 3.57 (d, *J* = 12.4 Hz, 1H), 2.97 (s, 3H); <sup>13</sup>C NMR (101 MHz, CDCl<sub>3</sub>) δ 177.8, 143.8, 137.1, 135.6, 133.2, 132.6, 131.3, 130.0, 128.3, 128.2, 128.2, 127.4, 126.5, 126.1, 126.0, 125.5, 125.4, 122.3, 108.1, 99.9, 58.4, 43.7, 26.1. HRMS (ESI) calcd. for C<sub>26</sub>H<sub>22</sub>NO [M+H]<sup>+</sup>: 364.1696, found: 364.1693.

The ee of compound **3w** was determined by HPLC using an IA<sub>Daicel</sub> column (n-hexane/i-PrOH = 80/20, flow rate = 1.0 mL/min, λ = 254 nm, *t*<sub>major</sub> = 8.13 min, *t*<sub>minor</sub> = 9.50 min).

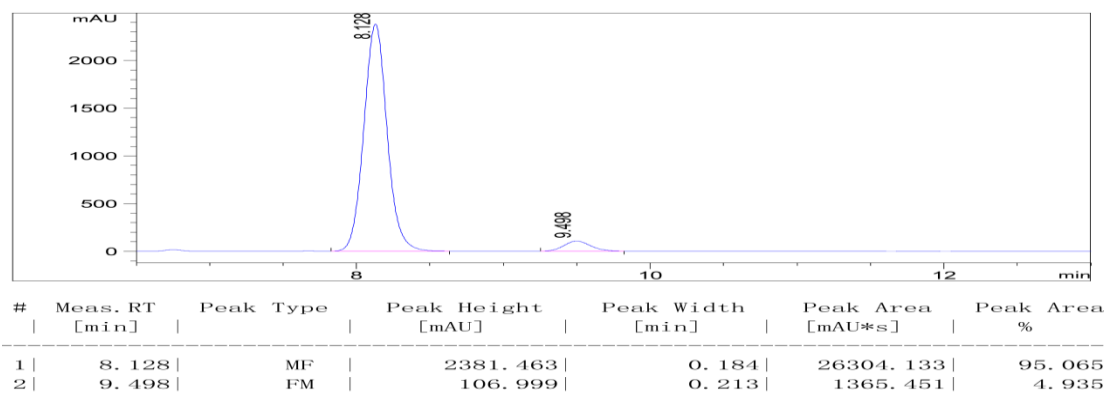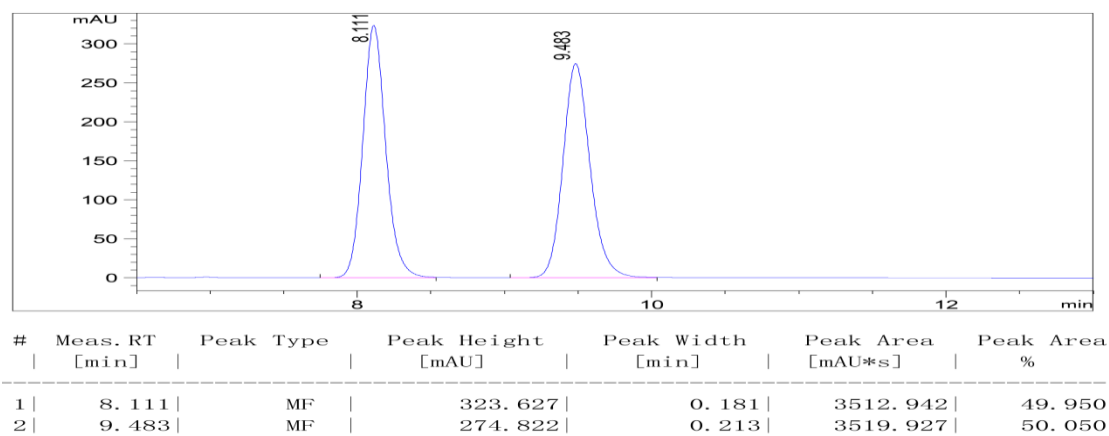

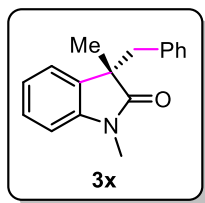

**(S)-3-benzyl-1,3-dimethylindolin-2-one (3x)**

Yield: 42% (10.5 mg), ee = 12%,  $[\alpha]_D^{33} = -11.3$  (c = 0.53, MeOH), or  $[\alpha]_D^{33} = -14.2$  (c = 0.53, *i*PrOH),  $^1\text{H NMR}$  (400 MHz,  $\text{CDCl}_3$ )  $\delta$  7.18 (td,  $J = 7.6, 1.2$  Hz, 1H), 7.13 (dd,  $J = 7.6, 1.6$  Hz, 1H), 7.08 - 7.01 (m, 4H), 6.86 - 6.83 (m, 2H), 6.61 (d,  $J = 7.6$  Hz, 1H), 3.12 (d,  $J = 12.8$ , 1H), 3.01 (d,  $J = 13.2$  Hz, 1H), 2.99 (s, 3H), 1.47 (s, 3H);  $^{13}\text{C NMR}$  (101 MHz,  $\text{CDCl}_3$ )  $\delta$  180.0, 143.1, 136.1, 133.0, 129.8, 127.7, 127.5, 126.4, 123.3, 122.0, 107.7, 49.9, 44.5, 25.9, 22.7.

The ee of compound **3x** was determined by HPLC using an IG<sub>Daicel</sub> column (n-hexane/*i*-PrOH = 98/2, flow rate = 1.0 mL/min,  $\lambda = 254$  nm,  $t_{\text{major}} = 10.77$  min,  $t_{\text{minor}} = 11.48$  min).

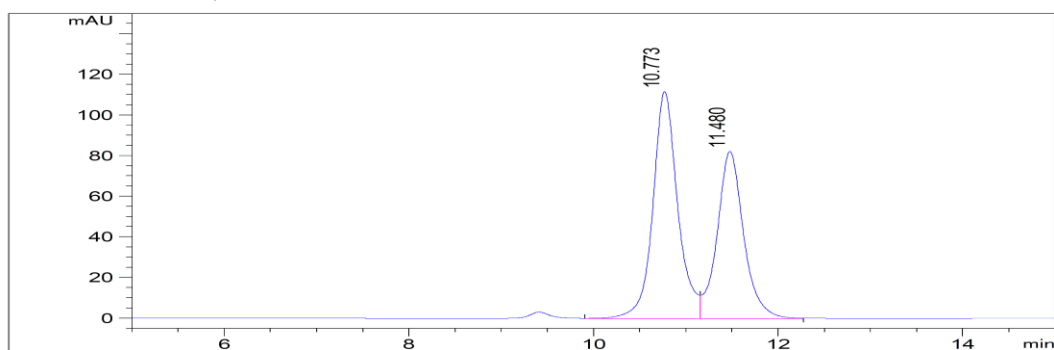

| # | Meas. RT [min] | Peak Type | Peak Height [mAU] | Peak Width [min] | Peak Area [mAU*s] | Peak Area % |
|---|----------------|-----------|-------------------|------------------|-------------------|-------------|
| 1 | 10.773         | VV        | 111.632           | 0.278            | 2084.104          | 55.964      |
| 2 | 11.480         | MF        | 82.222            | 0.332            | 1639.879          | 44.036      |

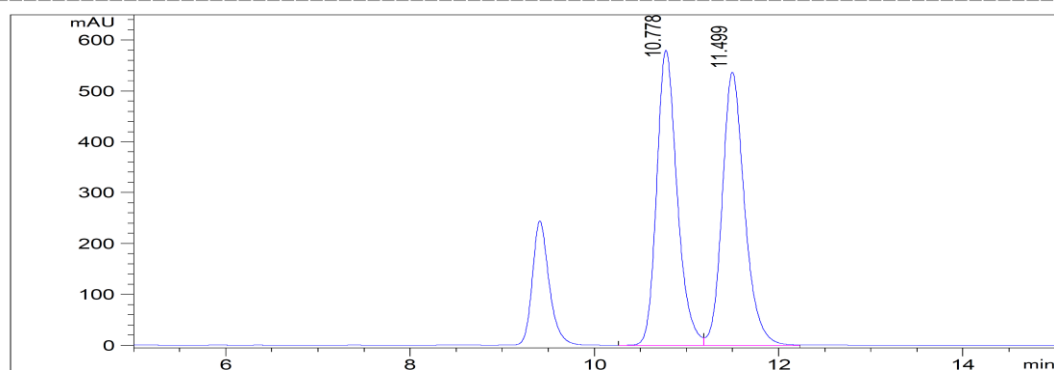

| # | Meas. RT [min] | Peak Type | Peak Height [mAU] | Peak Width [min] | Peak Area [mAU*s] | Peak Area % |
|---|----------------|-----------|-------------------|------------------|-------------------|-------------|
| 1 | 10.778         | BV        | 580.038           | 0.236            | 8952.672          | 49.763      |
| 2 | 11.499         | MF        | 536.626           | 0.281            | 9038.028          | 50.237      |

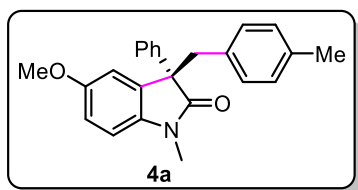

**(S)-5-methoxy-1-methyl-3-(4-methylbenzyl)-3-phenylindolin-2-one (4a)**

Yield: 70% (25.0 mg), ee = 96%,  $[\alpha]_D^{19} = -22.3$  (c = 1.1, CHCl<sub>3</sub>), <sup>1</sup>H NMR (400 MHz, CDCl<sub>3</sub>) δ 7.48 (d, *J* = 7.6 Hz, 2H), 7.33 (t, *J* = 7.2 Hz, 2H), 7.28 (d, *J* = 7.2 Hz, 1H), 6.83 (d, *J* = 8.0 Hz, 2H), 6.79 (d, *J* = 2.4 Hz, 1H), 6.76 - 6.73 (m, 3H), 6.54 (d, *J* = 8.4 Hz, 1H), 3.77 (s, 3H), 3.64 (d, *J* = 12.8 Hz, 1H), 3.41 (d, *J* = 12.8 Hz, 1H), 2.94 (s, 3H), 2.19 (s, 3H); <sup>13</sup>C NMR (101 MHz, CDCl<sub>3</sub>) δ 177.5, 155.5, 139.7, 137.4, 135.9, 132.6, 132.5, 129.8, 128.5, 128.2, 127.3, 127.2, 112.8, 112.5, 108.3, 58.6, 55.8, 43.4, 26.1, 21.0. HRMS (ESI) calcd. for C<sub>24</sub>H<sub>24</sub>NO<sub>2</sub> [M+H]<sup>+</sup>: 358.1802, found: 358.1819.

The ee of compound **4a** was determined by HPLC using an IC<sub>Daicel</sub> column (n-hexane/*i*-PrOH = 70/30, flow rate = 1.0 mL/min, λ = 254 nm, *t*<sub>major</sub> = 8.48 min, *t*<sub>minor</sub> = 14.00 min).

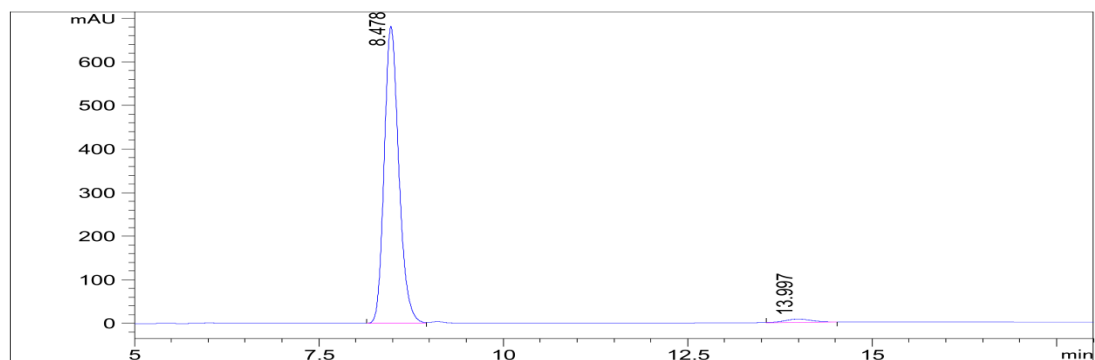

| # | Meas. RT [min] | Peak Type | Peak Height [mAU] | Peak Width [min] | Peak Area [mAU*s] | Peak Area % |
|---|----------------|-----------|-------------------|------------------|-------------------|-------------|
| 1 | 8.478          | MF        | 682.003           | 0.230            | 9417.779          | 97.923      |
| 2 | 13.997         | MF        | 7.748             | 0.430            | 199.707           | 2.077       |

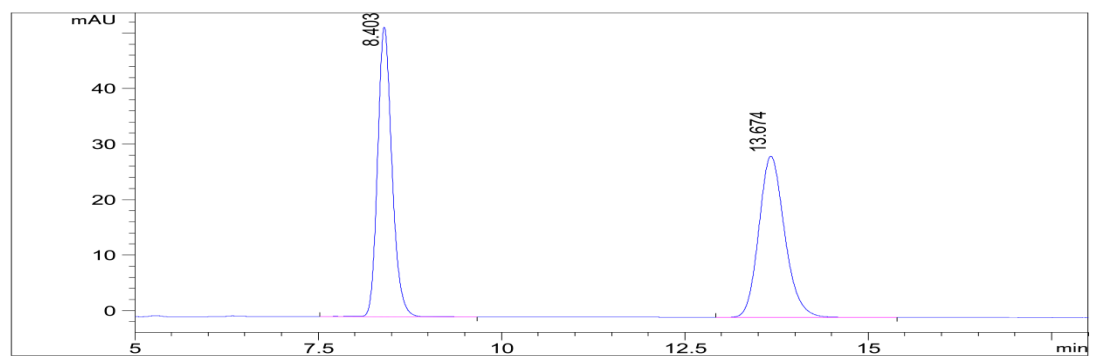

| # | Meas. RT [min] | Peak Type | Peak Height [mAU] | Peak Width [min] | Peak Area [mAU*s] | Peak Area % |
|---|----------------|-----------|-------------------|------------------|-------------------|-------------|
| 1 | 8.403          | VV R      | 52.118            | 0.207            | 711.713           | 49.979      |
| 2 | 13.674         | BB        | 29.043            | 0.378            | 712.302           | 50.021      |

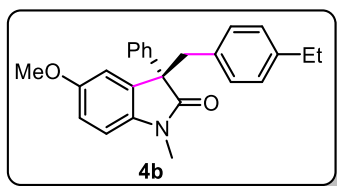

**(S)-3-(4-ethylbenzyl)-5-methoxy-1-methyl-3-phenylindolin-2-one (4b)**

Yield 72% (26.7 mg), ee = 95%,  $[\alpha]_D^{21} = -22.4$  (c = 1.4, CHCl<sub>3</sub>), <sup>1</sup>H NMR (400 MHz, CDCl<sub>3</sub>) δ 7.49 (d, *J* = 8.0 Hz, 2H), 7.34 (t, *J* = 7.2 Hz, 2H), 7.28 (d, *J* = 7.2 Hz, 1H), 6.86 (d, *J* = 8.0 Hz, 2H), 6.77 - 6.74 (m, 4H), 6.53 (d, *J* = 8.0 Hz, 1H), 3.77 (s, 3H), 3.62 (d, *J* = 13.2 Hz, 1H), 3.44 (d, *J* = 12.8 Hz, 1H), 2.93 (s, 3H), 2.49 (q, *J* = 7.6 Hz, 2H), 1.12 (t, *J* = 7.6 Hz, 3H); <sup>13</sup>C NMR (101 MHz, CDCl<sub>3</sub>) δ 177.5, 155.5, 142.4, 139.7, 137.4, 132.8, 132.6, 129.9, 128.5, 127.4, 127.3, 126.9, 112.7, 112.6, 108.3, 58.6, 55.8, 43.4, 28.3, 26.1, 15.6. HRMS (ESI) calcd. for C<sub>25</sub>H<sub>26</sub>NO<sub>2</sub> [M+H]<sup>+</sup>: 372.1958, found: 372.1971.

The ee of compound **4b** was determined by HPLC using an IC<sub>Daicel</sub> column (n-hexane/*i*-PrOH = 60/40, flow rate = 1.0 mL/min, λ = 254 nm, *t*<sub>major</sub> = 7.08 min, *t*<sub>minor</sub> = 11.37 min).

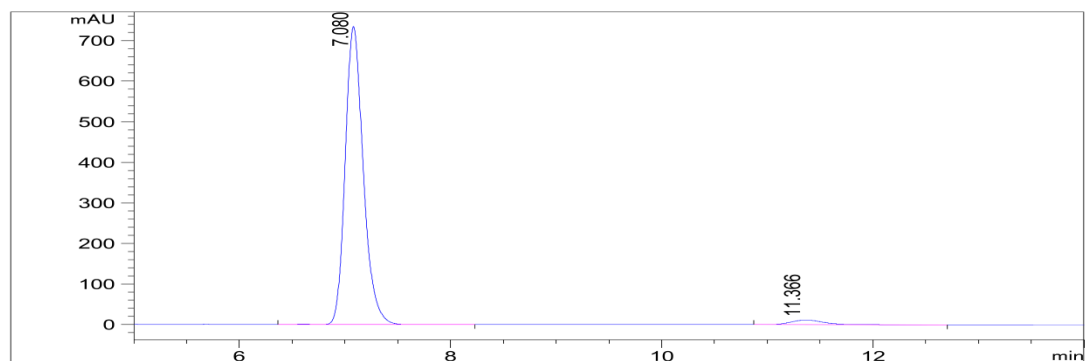

| # | Meas. RT [min] | Peak Type | Peak Height [mAU] | Peak Width [min] | Peak Area [mAU*s] | Peak Area % |
|---|----------------|-----------|-------------------|------------------|-------------------|-------------|
| 1 | 7.080          | VV R      | 734.483           | 0.183            | 8765.938          | 97.296      |
| 2 | 11.366         | BB        | 11.483            | 0.328            | 243.643           | 2.704       |

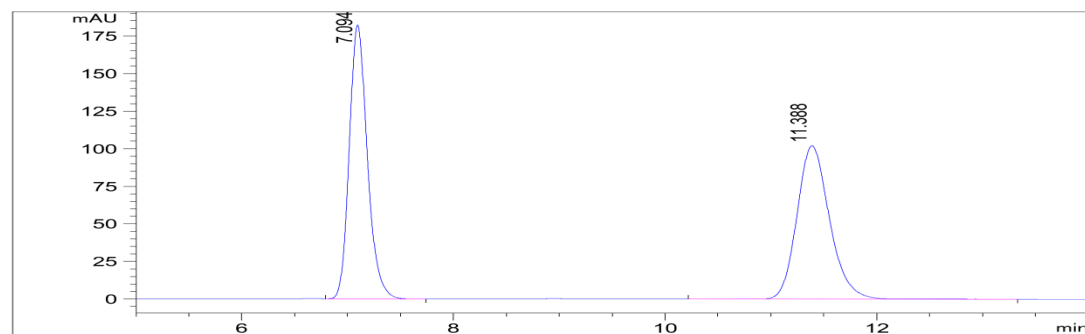

| # | Meas. RT [min] | Peak Type | Peak Height [mAU] | Peak Width [min] | Peak Area [mAU*s] | Peak Area % |
|---|----------------|-----------|-------------------|------------------|-------------------|-------------|
| 1 | 7.094          | FM        | 182.184           | 0.199            | 2170.739          | 49.926      |
| 2 | 11.388         | VB R      | 102.012           | 0.329            | 2177.175          | 50.074      |

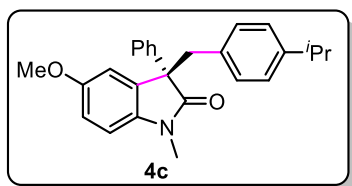

**(S)-3-(4-isopropylbenzyl)-5-methoxy-1-methyl-3-phenylindolin-2-one (4c)**

Yield: 74% (28.5 mg), 95% ee,  $[\alpha]_D^{21} = -25.6$  ( $c = 1.6$ ,  $\text{CHCl}_3$ ),  $^1\text{H NMR}$  (400 MHz,  $\text{CDCl}_3$ )  $\delta$  7.49 (d,  $J = 7.2$  Hz, 2H), 7.34 (t,  $J = 7.2$  Hz, 2H), 7.28 (d,  $J = 7.2$  Hz, 1H), 6.89 (d,  $J = 8.0$  Hz, 2H), 6.75 (d,  $J = 7.6$  Hz, 4H), 6.53 (d,  $J = 8.4$  Hz, 1H), 3.76 (s, 3H), 3.59 (d,  $J = 12.8$  Hz, 1H), 3.46 (d,  $J = 12.8$  Hz, 1H), 2.91 (s, 3H), 2.79 - 2.72 (m, 1H), 1.13 (dd,  $J = 6.8, 1.6$  Hz, 6H);  $^{13}\text{C NMR}$  (101 MHz,  $\text{CDCl}_3$ )  $\delta$  177.5, 155.5, 147.1, 139.6, 137.4, 132.9, 132.6, 129.9, 128.5, 127.4, 127.3, 125.4, 112.7, 112.6, 108.2, 58.6, 55.8, 43.5, 33.5, 26.1, 24.0, 23.8. HRMS (ESI) calcd. for  $\text{C}_{26}\text{H}_{28}\text{NO}_2$   $[\text{M}+\text{H}]^+$ : 386.2115, found: 386.2128.

The ee of compound **4c** was determined by HPLC using an IC<sub>Daicel</sub> column (n-hexane/*i*-PrOH = 70/30, flow rate = 1.0 mL/min,  $\lambda = 254$  nm,  $t_{\text{major}} = 7.95$  min,  $t_{\text{minor}} = 13.73$  min).

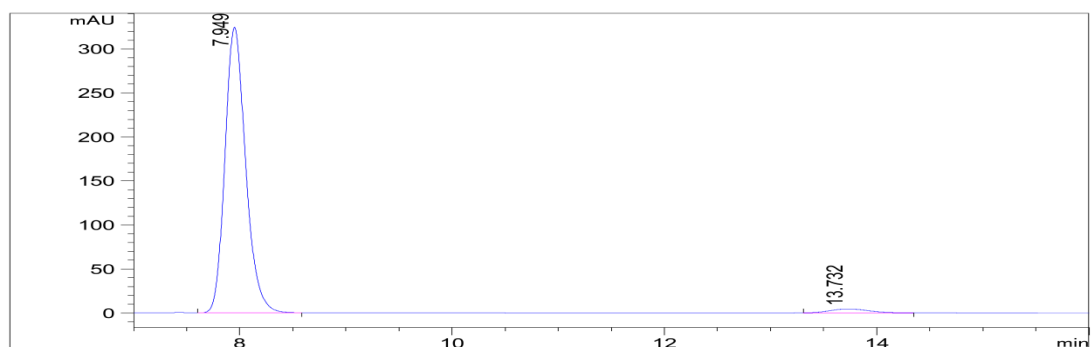

| # | Meas. RT [min] | Peak Type | Peak Height [mAU] | Peak Width [min] | Peak Area [mAU*s] | Peak Area % |
|---|----------------|-----------|-------------------|------------------|-------------------|-------------|
| 1 | 7.949          | FM        | 324.456           | 0.226            | 4407.672          | 97.344      |
| 2 | 13.732         | MF        | 4.658             | 0.430            | 120.261           | 2.656       |

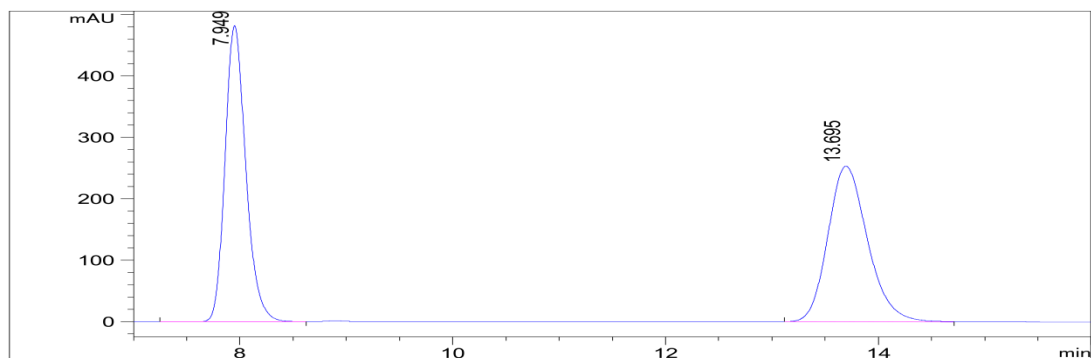

| # | Meas. RT [min] | Peak Type | Peak Height [mAU] | Peak Width [min] | Peak Area [mAU*s] | Peak Area % |
|---|----------------|-----------|-------------------|------------------|-------------------|-------------|
| 1 | 7.949          | MF        | 482.029           | 0.227            | 6553.250          | 49.920      |
| 2 | 13.695         | FM        | 253.484           | 0.432            | 6574.374          | 50.080      |

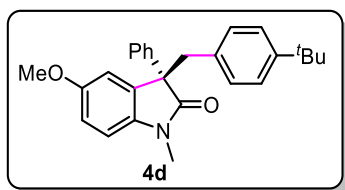

**(S)-3-(4-(tert-butyl)benzyl)-5-methoxy-1-methyl-3-phenylindolin-2-one (4d)**

Yield: 70% (27.9 mg), ee = 93%,  $[\alpha]_D^{18} = -26.1$  (c = 1.7, CHCl<sub>3</sub>), <sup>1</sup>H NMR (400 MHz, CDCl<sub>3</sub>) δ 7.50 (d, *J* = 7.6 Hz, 2H), 7.34 (t, *J* = 7.2 Hz, 2H), 7.28 (d, *J* = 7.2 Hz, 1H), 7.05 (d, *J* = 8.0 Hz, 2H), 6.76 - 6.72 (m, 4H), 6.53 (d, *J* = 8.4 Hz, 1H), 3.75 (s, 3H), 3.57 (d, *J* = 12.8 Hz, 1H), 3.48 (d, *J* = 12.8 Hz, 1H), 2.91 (s, 3H), 1.20 (s, 9H); <sup>13</sup>C NMR (101 MHz, CDCl<sub>3</sub>) δ 177.5, 155.5, 149.3, 139.6, 137.4, 132.6, 132.6, 129.6, 128.5, 127.3, 124.2, 112.8, 112.6, 108.2, 58.6, 55.8, 43.4, 34.2, 31.2, 26.1. HRMS (ESI) calcd. for C<sub>27</sub>H<sub>30</sub>NO<sub>2</sub> [M+H]<sup>+</sup>: 400.2271, found: 400.2287.

The ee of compound **4d** was determined by HPLC using an IC<sub>Daicel</sub> column (n-hexane/*i*-PrOH = 70/30, flow rate = 1.0 mL/min, λ = 254 nm, *t*<sub>major</sub> = 7.51 min, *t*<sub>minor</sub> = 12.72 min).

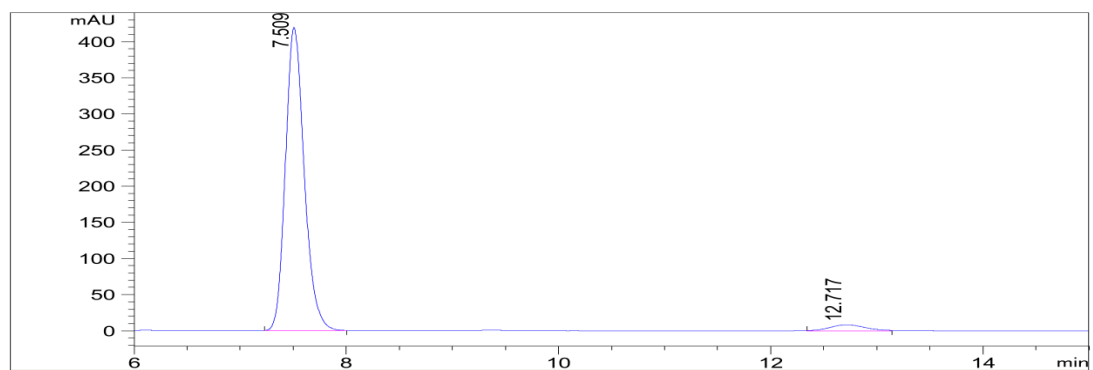

| # | Meas. RT [min] | Peak Type | Peak Height [mAU] | Peak Width [min] | Peak Area [mAU*s] | Peak Area % |
|---|----------------|-----------|-------------------|------------------|-------------------|-------------|
| 1 | 7.509          | MF        | 419.505           | 0.206            | 5195.427          | 96.472      |
| 2 | 12.717         | MF        | 8.319             | 0.381            | 189.976           | 3.528       |

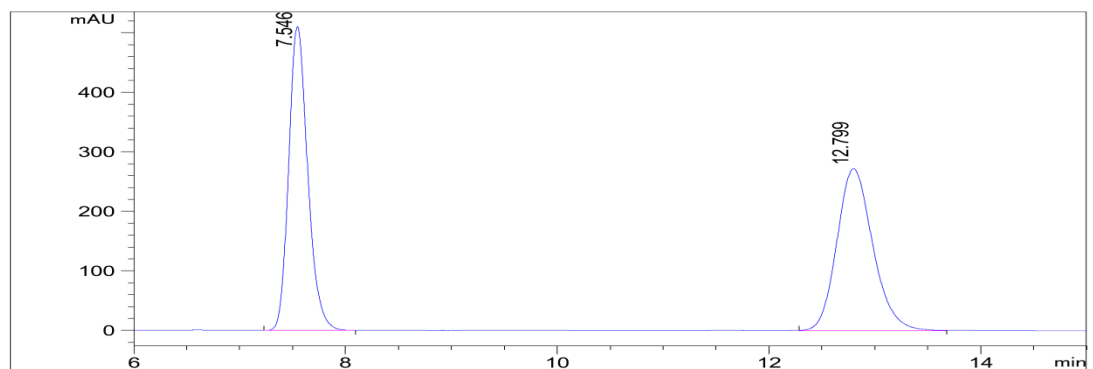

| # | Meas. RT [min] | Peak Type | Peak Height [mAU] | Peak Width [min] | Peak Area [mAU*s] | Peak Area % |
|---|----------------|-----------|-------------------|------------------|-------------------|-------------|
| 1 | 7.546          | MF        | 510.374           | 0.209            | 6388.309          | 49.965      |
| 2 | 12.799         | MF        | 272.000           | 0.392            | 6397.383          | 50.035      |

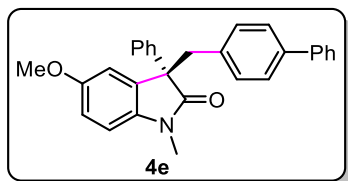

**(S)-3-([1,1'-biphenyl]-4-ylmethyl)-5-methoxy-1-methyl-3-phenylindolin-2-one  
(4e)**

Yield: 79% (33.1 mg), ee = 97%,  $[\alpha]_D^{19} = +33.5$  (c = 1.7, CHCl<sub>3</sub>), <sup>1</sup>H NMR (400 MHz, CDCl<sub>3</sub>) δ 7.50 (t, *J* = 8.0 Hz, 4H), 7.36 (q, *J* = 7.6 Hz, 4H), 7.30 - 7.27 (m, 4H), 6.93 (d, *J* = 8.0 Hz, 2H), 6.83 (d, *J* = 2.4 Hz, 1H), 6.75 (dd, *J* = 8.4, 2.4 Hz, 1H), 6.52 (d, *J* = 8.4 Hz, 1H), 3.77 (s, 3H), 3.72 (d, *J* = 12.8 Hz, 1H), 3.49 (d, *J* = 12.8 Hz, 1H), 2.94 (s, 3H); <sup>13</sup>C NMR (101 MHz, CDCl<sub>3</sub>) δ 177.4, 155.6, 140.6, 139.6, 139.1, 137.4, 134.8, 132.5, 130.4, 128.7, 128.6, 127.4, 127.2, 127.1, 126.8, 126.0, 112.8, 112.6, 108.4, 58.6, 55.8, 43.5, 26.1. HRMS (ESI) calcd. for C<sub>29</sub>H<sub>26</sub>NO<sub>2</sub> [M+H]<sup>+</sup>: 420.1958, found: 420.1954.

The ee of compound **4e** was determined by HPLC using an IC<sub>Daicel</sub> column (n-hexane/*i*-PrOH = 70/30, flow rate = 1.0 mL/min, λ = 254 nm, *t*<sub>major</sub> = 9.58 min, *t*<sub>minor</sub> = 17.28 min).

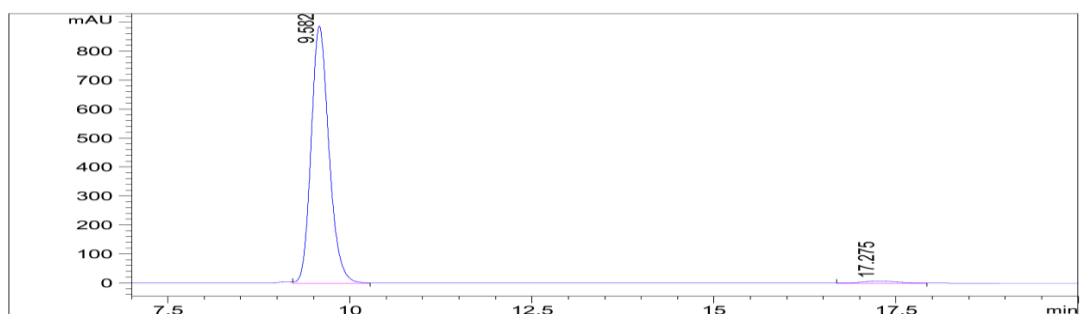

| # | Meas. RT [min] | Peak Type | Peak Height [mAU] | Peak Width [min] | Peak Area [mAU*s] | Peak Area % |
|---|----------------|-----------|-------------------|------------------|-------------------|-------------|
| 1 | 9.582          | MF        | 887.465           | 0.284            | 15111.474         | 98.378      |
| 2 | 17.275         | MM        | 7.356             | 0.565            | 249.222           | 1.622       |

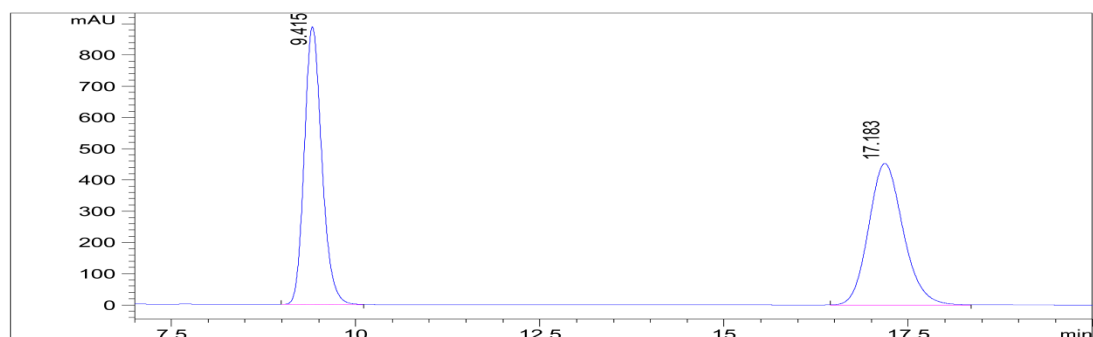

| # | Meas. RT [min] | Peak Type | Peak Height [mAU] | Peak Width [min] | Peak Area [mAU*s] | Peak Area % |
|---|----------------|-----------|-------------------|------------------|-------------------|-------------|
| 1 | 9.415          | MF        | 889.201           | 0.276            | 14728.681         | 49.950      |
| 2 | 17.183         | MF        | 452.936           | 0.543            | 14758.121         | 50.050      |



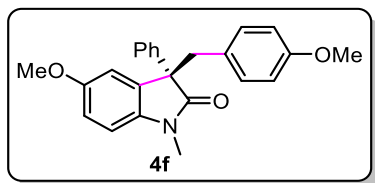

**(S)-5-methoxy-3-(4-methoxybenzyl)-1-methyl-3-phenylindolin-2-one (4f)**

Yield: 74% (27.6 mg), ee = 97%,  $[\alpha]_D^{18} = -6.8$  (c = 1.1, CHCl<sub>3</sub>), <sup>1</sup>H NMR (400 MHz, CDCl<sub>3</sub>) δ 7.48 (d, *J* = 7.2 Hz, 2H), 7.34 (t, *J* = 7.2 Hz, 2H), 7.28 (d, *J* = 7.2 Hz, 1H), 6.81 - 6.73 (m, 4H), 6.55 (dd, *J* = 13.2, 8.4 Hz, 3H), 3.78 (s, 3H), 3.69 (s, 3H), 3.63 (d, *J* = 13.2 Hz, 1H), 3.39 (d, *J* = 13.2 Hz, 1H), 2.94 (s, 3H); <sup>13</sup>C NMR (101 MHz, CDCl<sub>3</sub>) δ 177.5, 158.2, 155.6, 139.7, 137.4, 132.7, 131.0, 128.5, 127.7, 127.3, 127.2, 112.8, 112.7, 112.5, 108.3, 58.7, 55.8, 55.0, 43.0, 26.1. HRMS (ESI) calcd. for C<sub>24</sub>H<sub>24</sub>NO<sub>3</sub> [M+H]<sup>+</sup>: 374.1751, found:374.1769.

The ee of compound **4f** was determined by HPLC using an IC<sub>Daicel</sub> column (n-hexane/*i*-PrOH = 70/30, flow rate = 1.0 mL/min, λ = 254 nm, *t*<sub>major</sub> = 10.28 min, *t*<sub>minor</sub> = 17.87 min).

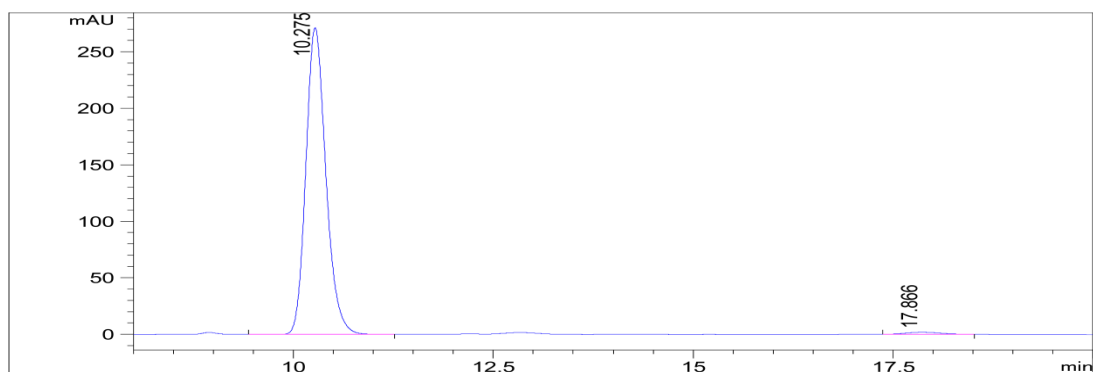

| # | Meas. RT [min] | Peak Type | Peak Height [mAU] | Peak Width [min] | Peak Area [mAU*s] | Peak Area % |
|---|----------------|-----------|-------------------|------------------|-------------------|-------------|
| 1 | 10.275         | VB R      | 271.234           | 0.267            | 4719.554          | 98.692      |
| 2 | 17.866         | MM        | 1.981             | 0.526            | 62.559            | 1.308       |

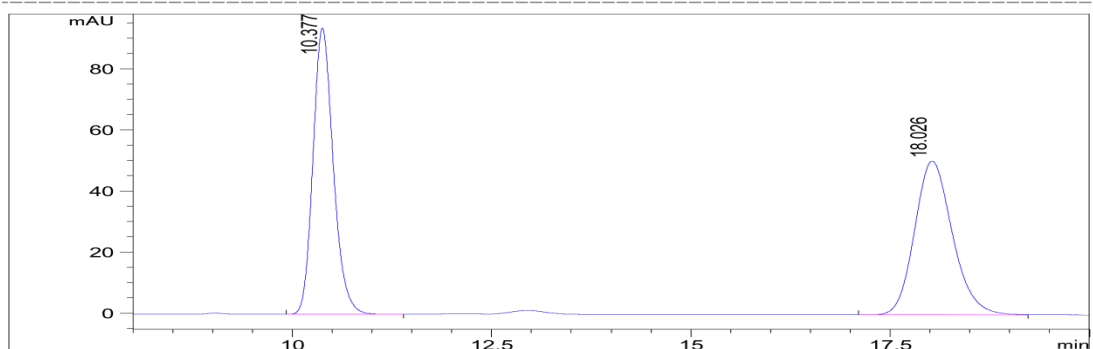

| # | Meas. RT [min] | Peak Type | Peak Height [mAU] | Peak Width [min] | Peak Area [mAU*s] | Peak Area % |
|---|----------------|-----------|-------------------|------------------|-------------------|-------------|
| 1 | 10.377         | BB        | 93.673            | 0.272            | 1655.907          | 50.006      |
| 2 | 18.026         | MF        | 50.315            | 0.548            | 1655.495          | 49.994      |

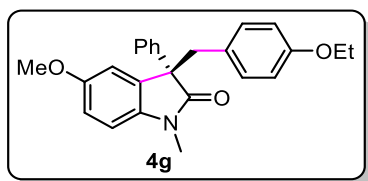

**(S)-3-(4-ethoxybenzyl)-5-methoxy-1-methyl-3-phenylindolin-2-one (4g)**

Yield: 76% (29.4 mg), ee = 97%,  $[\alpha]_D^{20} = -10.7$  (c = 0.9, CHCl<sub>3</sub>), <sup>1</sup>H NMR (400 MHz, CDCl<sub>3</sub>) δ 7.48 (d, *J* = 7.2 Hz, 2H), 7.34 (t, *J* = 6.8 Hz, 2H), 7.28 (d, *J* = 8.4 Hz, 1H), 6.81 - 6.74 (m, 4H), 6.57 - 6.52 (m, 3H), 3.90 (q, *J* = 6.8 Hz, 2H), 3.78 (s, 3H), 3.63 (d, *J* = 12.8 Hz, 1H), 3.38 (d, *J* = 13.2 Hz, 1H), 2.94 (s, 3H), 1.34 (t, *J* = 6.8 Hz, 3H); <sup>13</sup>C NMR (101 MHz, CDCl<sub>3</sub>) δ 177.6, 157.5, 155.6, 139.7, 137.4, 132.7, 131.0, 128.5, 127.6, 127.4, 127.2, 113.4, 112.7, 112.4, 108.3, 63.2, 58.8, 55.8, 43.0, 26.1, 14.8. HRMS (ESI) calcd. for C<sub>25</sub>H<sub>26</sub>NO<sub>3</sub> [M+H]<sup>+</sup>: 388.1907, found: 388.1924.

The ee of compound **4g** was determined by HPLC using an IC<sub>Daicel</sub> column (n-hexane/i-PrOH = 70/30, flow rate = 1.0 mL/min, λ = 254 nm, t<sub>major</sub> = 9.30 min, t<sub>minor</sub> = 16.45 min).

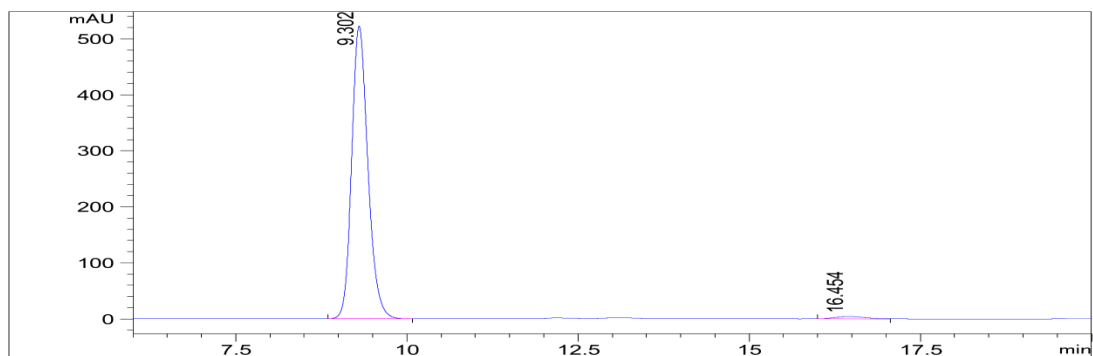

| # | Meas. RT [min] | Peak Type | Peak Height [mAU] | Peak Width [min] | Peak Area [mAU*s] | Peak Area % |
|---|----------------|-----------|-------------------|------------------|-------------------|-------------|
| 1 | 9.302          | MF        | 523.102           | 0.275            | 8639.233          | 98.541      |
| 2 | 16.454         | MF        | 4.140             | 0.515            | 127.906           | 1.459       |

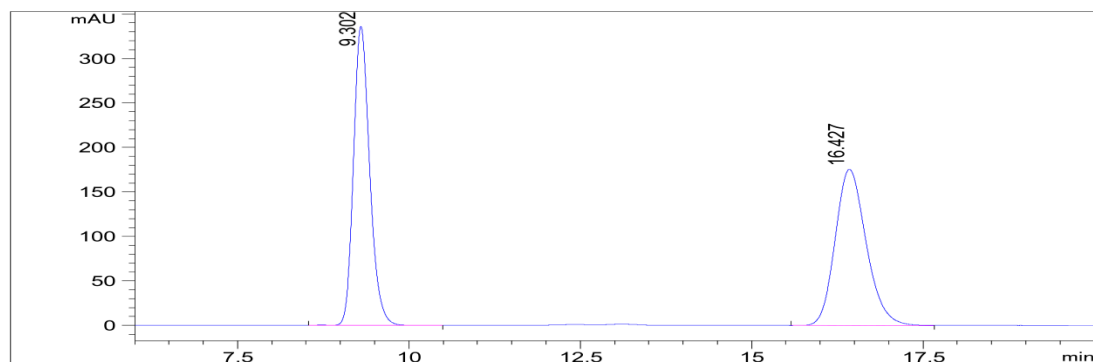

| # | Meas. RT [min] | Peak Type | Peak Height [mAU] | Peak Width [min] | Peak Area [mAU*s] | Peak Area % |
|---|----------------|-----------|-------------------|------------------|-------------------|-------------|
| 1 | 9.302          | VB R      | 335.969           | 0.252            | 5524.593          | 50.049      |
| 2 | 16.427         | MF        | 175.565           | 0.523            | 5513.731          | 49.951      |

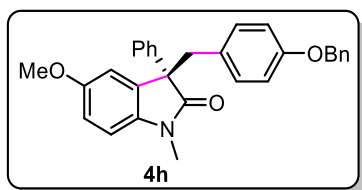

**(S)-3-(4-(benzyloxy)benzyl)-5-methoxy-1-methyl-3-phenylindolin-2-one (4h)**

Yield: 71% (31.9 mg), ee = 98%,  $[\alpha]_D^{20} = -2.1$  (c = 2.1, CHCl<sub>3</sub>), <sup>1</sup>H NMR (400 MHz, CDCl<sub>3</sub>) δ 7.48 (d, *J* = 7.2 Hz, 2H), 7.36 - 7.25 (m, 8H), 6.80 - 6.74 (m, 4H), 6.64 (d, *J* = 8.4 Hz, 2H), 6.52 (d, *J* = 8.4 Hz, 1H), 4.94 (s, 2H), 3.77 (s, 3H), 3.63 (d, *J* = 13.2 Hz, 1H), 3.39 (d, *J* = 13.2 Hz, 1H), 2.91 (s, 3H); <sup>13</sup>C NMR (101 MHz, CDCl<sub>3</sub>) δ 177.5, 157.3, 155.6, 139.6, 137.4, 137.0, 132.7, 131.0, 128.5, 128.4, 128.0, 127.8, 127.4, 127.2, 113.8, 112.7, 112.4, 108.3, 69.7, 58.7, 55.8, 43.0, 26.1. HRMS (ESI) calcd. for C<sub>30</sub>H<sub>28</sub>NO<sub>3</sub> [M+H]<sup>+</sup>: 450.2064, found: 450.2061.

The ee of compound **4h** was determined by HPLC using an IA<sub>Daicel</sub> column (n-hexane/*i*-PrOH = 80/20, flow rate = 1.0 mL/min, λ = 254 nm, *t*<sub>minor</sub> = 8.78 min, *t*<sub>major</sub> = 9.96 min).

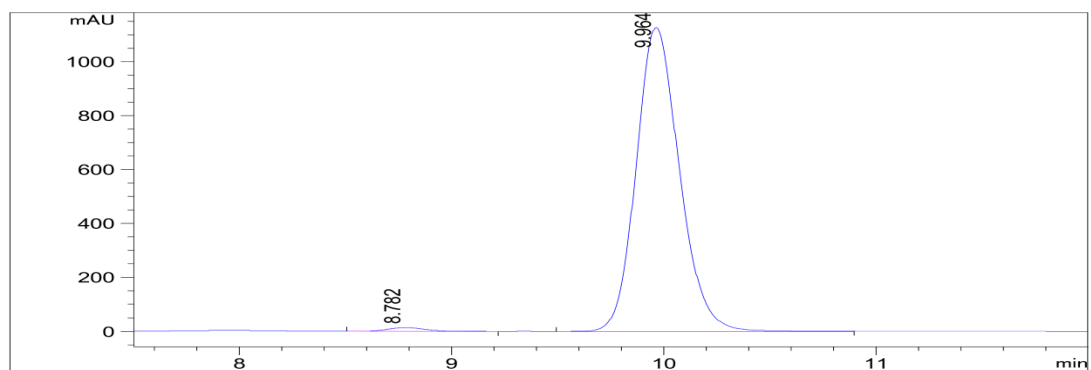

| # | Meas. RT [min] | Peak Type | Peak Height [mAU] | Peak Width [min] | Peak Area [mAU*s] | Peak Area % |
|---|----------------|-----------|-------------------|------------------|-------------------|-------------|
| 1 | 8.782          | VB        | 14.087            | 0.200            | 178.114           | 1.100       |
| 2 | 9.964          | MF        | 1127.314          | 0.237            | 16011.175         | 98.900      |

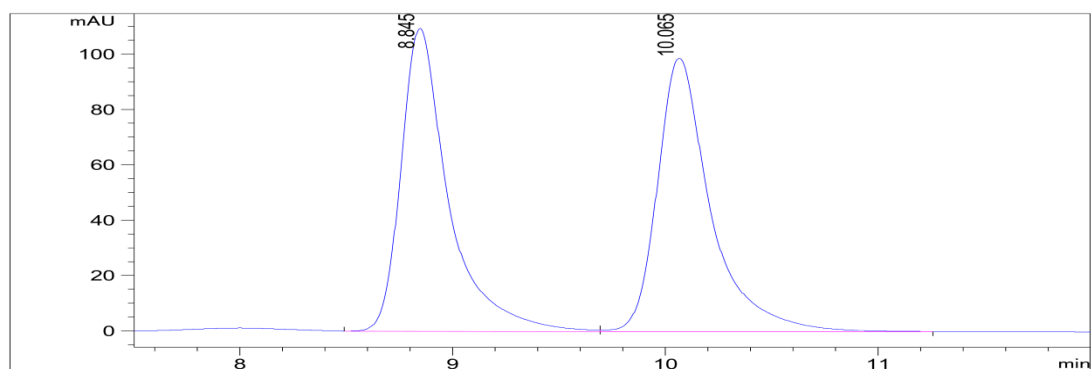

| # | Meas. RT [min] | Peak Type | Peak Height [mAU] | Peak Width [min] | Peak Area [mAU*s] | Peak Area % |
|---|----------------|-----------|-------------------|------------------|-------------------|-------------|
| 1 | 8.845          | FM        | 109.458           | 0.260            | 1706.348          | 49.797      |
| 2 | 10.065         | MF        | 98.750            | 0.290            | 1720.251          | 50.203      |

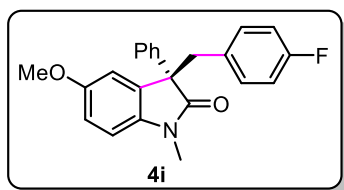

**(S)-3-(4-fluorobenzyl)-5-methoxy-1-methyl-3-phenylindolin-2-one (4i)**

Yield: 82% (29.6 mg), 96% ee,  $[\alpha]_D^{18} = -32.7$  ( $c = 1.9$ ,  $\text{CHCl}_3$ ),  $^1\text{H NMR}$  (400 MHz,  $\text{CDCl}_3$ )  $\delta$  7.47 (d,  $J = 7.2$  Hz, 2H), 7.34 (t,  $J = 7.2$  Hz, 2H), 7.29 (d,  $J = 6.8$  Hz, 1H), 6.84 - 6.81 (m, 3H), 6.77 - 6.69 (m, 3H), 6.54 (d,  $J = 8.4$  Hz, 1H), 3.78 (s, 3H), 3.68 (d,  $J = 13.2$  Hz, 1H), 3.39 (d,  $J = 12.8$  Hz, 1H), 2.93 (s, 3H);  $^{13}\text{C NMR}$  (101 MHz,  $\text{CDCl}_3$ )  $\delta$  177.3, 161.6 (d,  $J_{CF} = 243.4$  Hz), 155.7, 139.4, 137.3, 132.4, 131.4 (d,  $J_{CF} = 7.8$  Hz), 131.3 (d,  $J_{CF} = 3.2$  Hz), 128.6, 127.5, 127.1, 114.2 (d,  $J_{CF} = 20.9$  Hz), 112.6 (d,  $J_{CF} = 29.2$  Hz), 108.4, 58.6, 55.8, 42.9, 26.1. HRMS (ESI) calcd. for  $\text{C}_{23}\text{H}_{21}\text{FNO}_2$   $[\text{M}+\text{H}]^+$ : 362.1551, found: 362.1550.

The ee of compound **4i** was determined by HPLC using an IC<sub>Dai</sub>cel column (n-hexane/i-PrOH = 80/20, flow rate = 1.0 mL/min,  $\lambda = 254$  nm,  $t_{\text{major}} = 8.62$  min,  $t_{\text{minor}} = 17.72$  min).

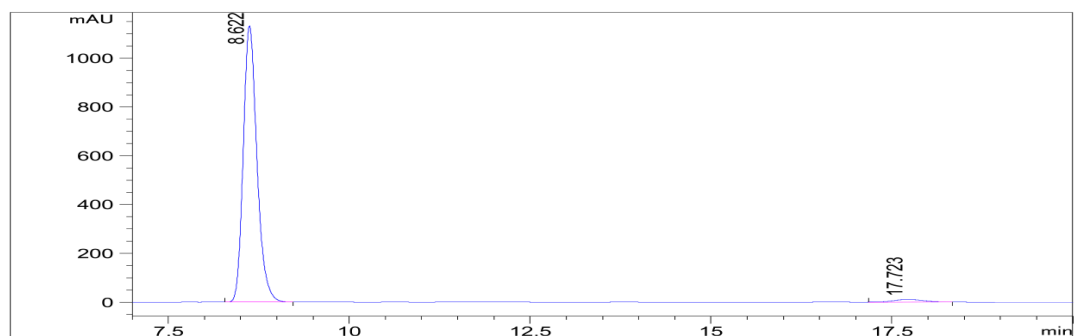

| # | Meas. RT [min] | Peak Type | Peak Height [mAU] | Peak Width [min] | Peak Area [mAU*s] | Peak Area % |
|---|----------------|-----------|-------------------|------------------|-------------------|-------------|
| 1 | 8.622          | MF        | 1133.190          | 0.219            | 14891.011         | 97.831      |
| 2 | 17.723         | MM        | 11.267            | 0.488            | 330.095           | 2.169       |

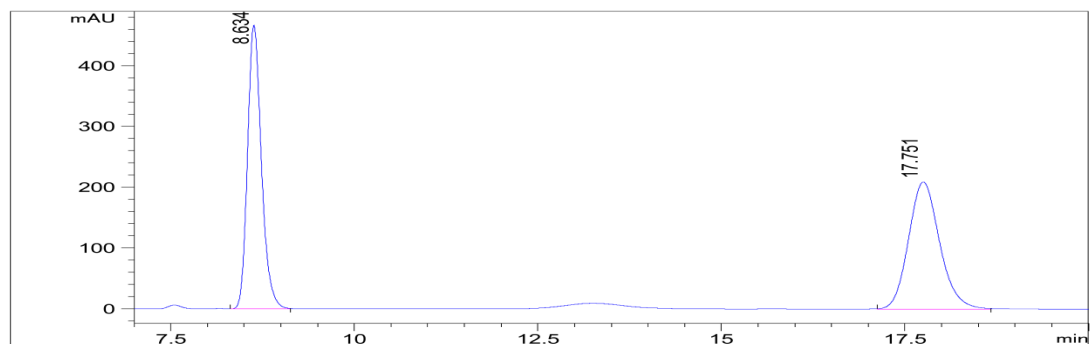

| # | Meas. RT [min] | Peak Type | Peak Height [mAU] | Peak Width [min] | Peak Area [mAU*s] | Peak Area % |
|---|----------------|-----------|-------------------|------------------|-------------------|-------------|
| 1 | 8.634          | MF        | 467.151           | 0.219            | 6135.394          | 49.970      |
| 2 | 17.751         | MF        | 209.059           | 0.490            | 6142.789          | 50.030      |

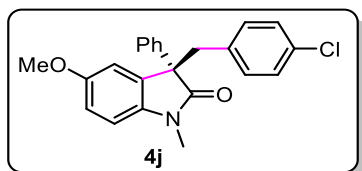

**(S)-3-(4-chlorobenzyl)-5-methoxy-1-methyl-3-phenylindolin-2-one (4j)**

Yield: 78% (29.4 mg), ee = 95%,  $[\alpha]_D^{18} = -20.0$  (c = 1.6, CHCl<sub>3</sub>), <sup>1</sup>H NMR (400 MHz, CDCl<sub>3</sub>) δ 7.46 (d, *J* = 7.2 Hz, 2H), 7.34 (t, *J* = 7.2 Hz, 2H), 7.29 (d, *J* = 7.2 Hz, 1H), 7.00 (d, *J* = 8.4 Hz, 2H), 6.82 - 6.79 (m, 3H), 6.76 (dd, *J* = 8.4, 2.4 Hz, 1H), 6.55 (d, *J* = 8.4 Hz, 1H), 3.78 (s, 3H), 3.68 (d, *J* = 12.8 Hz, 1H), 3.39 (d, *J* = 12.8 Hz, 1H), 2.94 (s, 3H); <sup>13</sup>C NMR (101 MHz, CDCl<sub>3</sub>) δ 177.2, 155.7, 139.4, 137.3, 134.2, 132.4, 132.3, 131.3, 128.6, 127.6, 127.5, 127.1, 112.8, 112.5, 108.5, 58.5, 55.8, 43.0, 26.2. HRMS (ESI) calcd. for C<sub>23</sub>H<sub>21</sub>ClNO<sub>2</sub> [M+H]<sup>+</sup>: 378.1255, found: 378.1265.

The ee of compound **4j** was determined by HPLC using an IC<sub>Daicel</sub> column (n-hexane/*i*-PrOH = 70/30, flow rate = 1.0 mL/min, λ = 254 nm, *t*<sub>major</sub> = 7.15 min, *t*<sub>minor</sub> = 12.87 min).

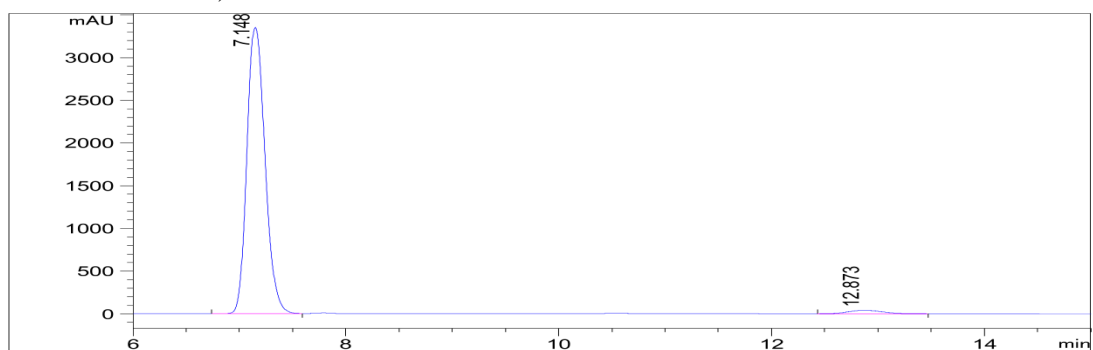

| # | Meas. RT [min] | Peak Type | Peak Height [mAU] | Peak Width [min] | Peak Area [mAU*s] | Peak Area % |
|---|----------------|-----------|-------------------|------------------|-------------------|-------------|
| 1 | 7.148          | MF        | 3350.274          | 0.198            | 39724.672         | 97.662      |
| 2 | 12.873         | FM        | 42.353            | 0.374            | 950.951           | 2.338       |

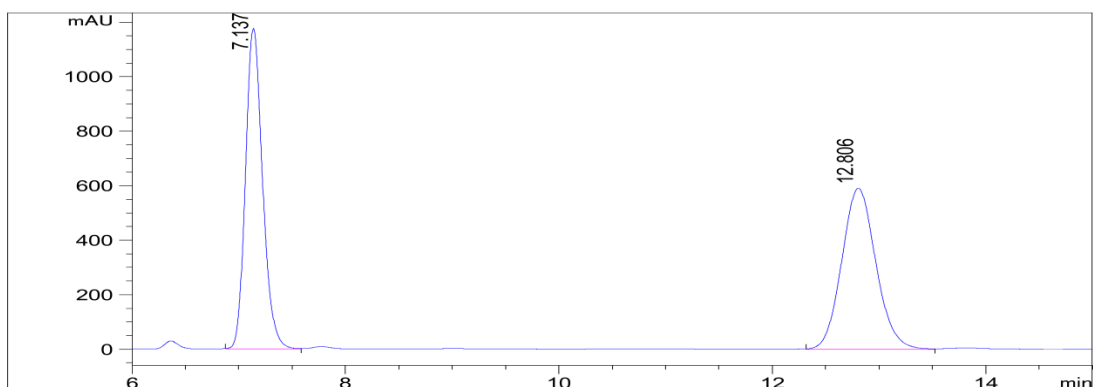

| # | Meas. RT [min] | Peak Type | Peak Height [mAU] | Peak Width [min] | Peak Area [mAU*s] | Peak Area % |
|---|----------------|-----------|-------------------|------------------|-------------------|-------------|
| 1 | 7.137          | FM        | 1177.625          | 0.186            | 13118.810         | 50.021      |
| 2 | 12.806         | FM        | 590.722           | 0.370            | 13107.754         | 49.979      |

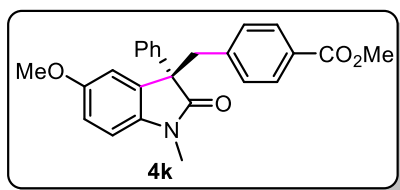

**methyl (S)-4-((5-methoxy-1-methyl-2-oxo-3-phenylindolin-3-yl)methyl)benzoate (4k)**

Yield: 62% (24.9 mg), ee = 96%,  $[\alpha]_D^{27} = -12.5$  (c = 1.92, CHCl<sub>3</sub>), <sup>1</sup>H NMR (400 MHz, CDCl<sub>3</sub>) δ 7.71 (d, *J* = 8.4 Hz, 2H), 7.47 (d, *J* = 7.6 Hz, 2H), 7.35 (t, *J* = 7.2 Hz, 2H), 7.30 (d, *J* = 7.2 Hz, 1H), 6.95 (d, *J* = 8.0 Hz, 2H), 6.83 (d, *J* = 2.4 Hz, 1H), 6.74 (dd, *J* = 8.4, 2.8 Hz, 1H), 6.51 (d, *J* = 8.4 Hz, 1H), 3.84 (s, 3H), 3.78 (s, 3H), 3.78 (d, *J* = 12.4 Hz, 1H), 3.46 (d, *J* = 12.4 Hz, 1H), 2.92 (s, 3H); <sup>13</sup>C NMR (101 MHz, CDCl<sub>3</sub>) δ 177.1, 167.0, 155.7, 141.2, 139.4, 137.2, 132.1, 130.0, 128.7, 128.6, 128.3, 127.5, 127.1, 112.8, 112.5, 108.4, 58.4, 55.8, 51.9, 43.6, 26.1. HRMS (ESI) calcd. for C<sub>25</sub>H<sub>23</sub>NNaO<sub>4</sub> [M+Na]<sup>+</sup>: 424.1519, found: 424.1534.

The ee of compound **4k** was determined by HPLC using an IA<sub>Daicel</sub> column (n-hexane/*i*-PrOH = 90/10, flow rate = 1.0 mL/min, λ = 254 nm, *t*<sub>minor</sub> = 12.41 min, *t*<sub>major</sub> = 14.02 min).

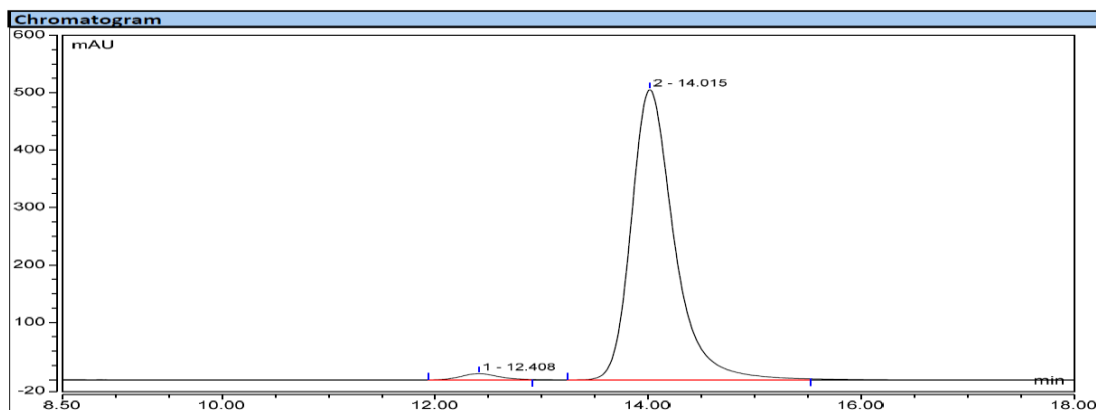

| No. | Peak Name | Retention Time min | Area mAU*min | Height mAU | Relative Area % | Relative Height % |
|-----|-----------|--------------------|--------------|------------|-----------------|-------------------|
| 1   |           | 12.408             | 4.652        | 11.052     | 1.93            | 2.14              |
| 2   |           | 14.015             | 236.642      | 505.606    | 98.07           | 97.86             |

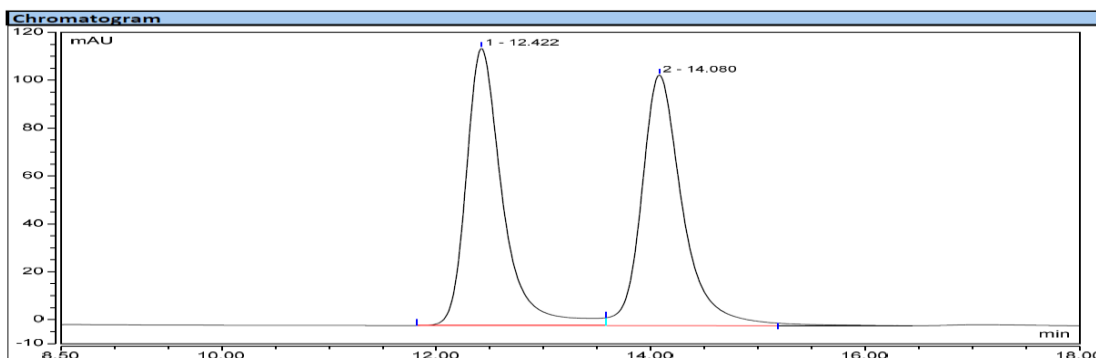

| No. | Peak Name | Retention Time min | Area mAU*min | Height mAU | Relative Area % | Relative Height % |
|-----|-----------|--------------------|--------------|------------|-----------------|-------------------|
| 1   |           | 12.422             | 45.539       | 115.763    | 49.77           | 52.50             |
| 2   |           | 14.080             | 45.959       | 104.719    | 50.23           | 47.50             |

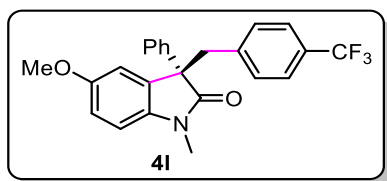

**(S)-5-methoxy-1-methyl-3-phenyl-3-(4-(trifluoromethyl)benzyl)indolin-2-one (4I)**

Yield: 79% (32.5 mg), ee = 91%,  $[\alpha]_D^{21} = -25.3$  (c = 1.8, CHCl<sub>3</sub>), <sup>1</sup>H NMR (400 MHz, CDCl<sub>3</sub>) δ 7.48 (d, *J* = 7.2 Hz, 2H), 7.35 (t, *J* = 7.2 Hz, 2H), 7.31 - 7.28 (m, 3H), 6.99 (d, *J* = 8.0 Hz, 2H), 6.82 (d, *J* = 2.8 Hz, 1H), 6.77 (dd, *J* = 8.4, 2.8 Hz, 1H), 6.55 (d, *J* = 8.4 Hz, 1H), 3.78 (s, 3H), 3.76 (d, *J* = 12.8 Hz, 1H), 3.48 (d, *J* = 12.8 Hz, 1H), 2.93 (s, 3H); <sup>13</sup>C NMR (101 MHz, CDCl<sub>3</sub>) δ 177.1, 155.8, 139.9, 138.2 (d, *J*<sub>CF</sub> = 206.0 Hz), 132.1, 130.3, 128.8 (d, *J*<sub>CF</sub> = 32.1 Hz), 128.7, 127.6, 127.1, 124.1 (d, *J*<sub>CF</sub> = 270.3 Hz), 124.3 (q, *J*<sub>CF</sub> = 3.8 Hz), 112.7 (d, *J*<sub>CF</sub> = 11.9 Hz), 108.6, 58.4, 55.8, 43.4, 26.1. HRMS (ESI) calcd. for C<sub>24</sub>H<sub>21</sub>F<sub>3</sub>NO<sub>2</sub> [M+H]<sup>+</sup>: 412.1519, found: 412.1534.

The ee of compound **4I** was determined by HPLC using an IC<sub>Daicel</sub> column (n-hexane/*i*-PrOH = 70/30, flow rate = 1.0 mL/min, λ = 254 nm, *t*<sub>major</sub> = 5.83 min, *t*<sub>minor</sub> = 10.02 min).

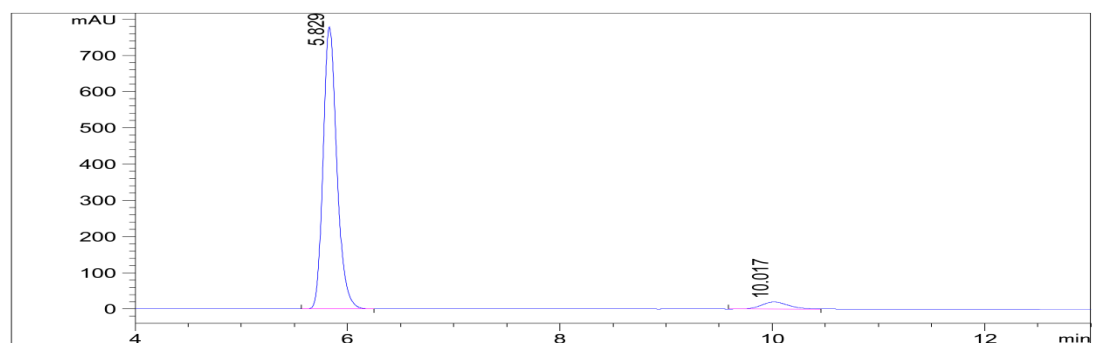

| # | Meas. RT [min] | Peak Type | Peak Height [mAU] | Peak Width [min] | Peak Area [mAU*s] | Peak Area % |
|---|----------------|-----------|-------------------|------------------|-------------------|-------------|
| 1 | 5.829          | MF        | 779.785           | 0.149            | 6994.180          | 95.376      |
| 2 | 10.017         | MF        | 19.286            | 0.293            | 339.084           | 4.624       |

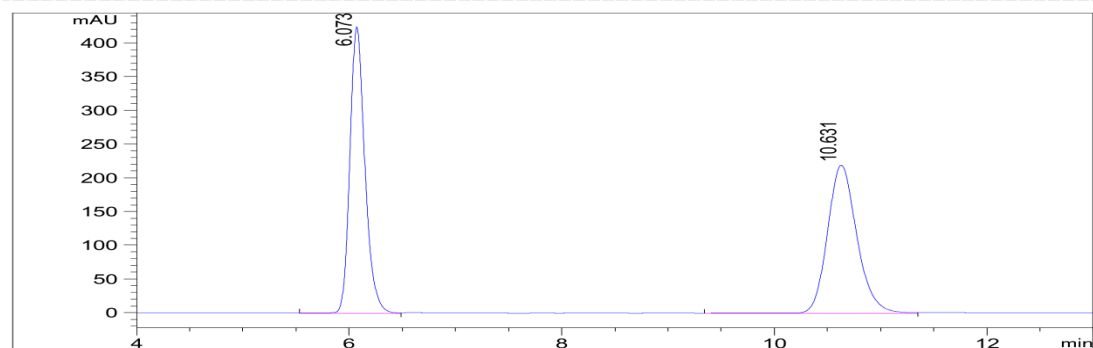

| # | Meas. RT [min] | Peak Type | Peak Height [mAU] | Peak Width [min] | Peak Area [mAU*s] | Peak Area % |
|---|----------------|-----------|-------------------|------------------|-------------------|-------------|
| 1 | 6.073          | MF        | 424.635           | 0.164            | 4183.896          | 49.838      |
| 2 | 10.631         | MF        | 219.445           | 0.320            | 4211.087          | 50.162      |

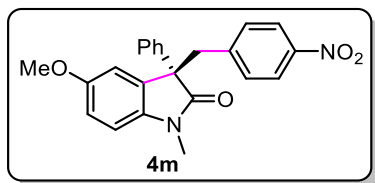

**(S)-5-methoxy-1-methyl-3-(4-nitrobenzyl)-3-phenylindolin-2-one (4m)**

Yield: 76% (29.5 mg), ee = 93%,  $[\alpha]_D^{20} = -13.7$  (c = 1.9, CHCl<sub>3</sub>), <sup>1</sup>H NMR (400 MHz, CDCl<sub>3</sub>) δ 7.90 (d, *J* = 8.8 Hz, 2H), 7.48 - 7.46 (m, 2H), 7.36 (t, *J* = 6.8 Hz, 2H), 7.32 - 7.31 (m, 1H), 7.06 (d, *J* = 8.8 Hz, 2H), 6.87 (d, *J* = 2.4 Hz, 1H), 6.77 (dd, *J* = 8.4, 2.4 Hz, 1H), 6.56 (d, *J* = 8.4 Hz, 1H), 3.84 (d, *J* = 12.8 Hz, 1H), 3.80 (s, 3H), 3.50 (d, *J* = 12.8 Hz, 1H), 2.95 (s, 3H); <sup>13</sup>C NMR (101 MHz, CDCl<sub>3</sub>) δ 176.8, 155.8, 146.7, 143.6, 139.0, 137.0, 131.7, 130.8, 128.7, 127.7, 127.0, 122.6, 112.8, 112.5, 108.7, 58.3, 55.8, 43.3, 26.2. HRMS (ESI) calcd. for C<sub>23</sub>H<sub>21</sub>N<sub>2</sub>O<sub>4</sub> [M+H]<sup>+</sup>: 389.1496, found: 389.1507.

The ee of compound **4m** was determined by HPLC using an IA<sub>Daicel</sub> column (n-hexane/*i*-PrOH = 80/20, flow rate = 1.0 mL/min, λ = 254 nm, *t*<sub>minor</sub> = 9.51 min, *t*<sub>major</sub> = 13.66 min).

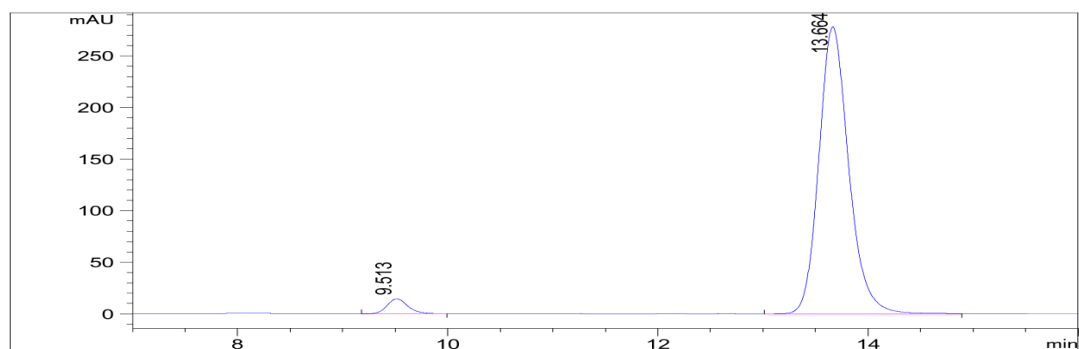

| # | Meas. RT [min] | Peak Type | Peak Height [mAU] | Peak Width [min] | Peak Area [mAU*s] | Peak Area % |
|---|----------------|-----------|-------------------|------------------|-------------------|-------------|
| 1 | 9.513          | MM        | 14.516            | 0.230            | 200.671           | 3.518       |
| 2 | 13.664         | MF        | 278.325           | 0.330            | 5503.377          | 96.482      |

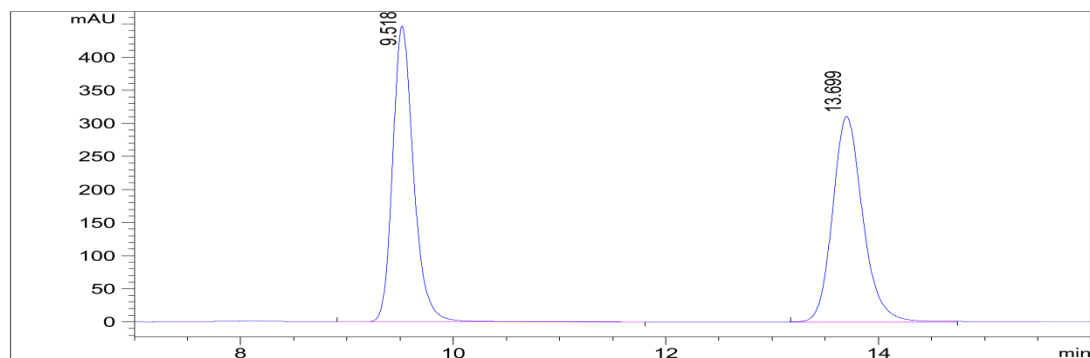

| # | Meas. RT [min] | Peak Type | Peak Height [mAU] | Peak Width [min] | Peak Area [mAU*s] | Peak Area % |
|---|----------------|-----------|-------------------|------------------|-------------------|-------------|
| 1 | 9.518          | VV R      | 446.577           | 0.208            | 6131.980          | 49.983      |
| 2 | 13.699         | MF        | 310.602           | 0.329            | 6136.190          | 50.017      |



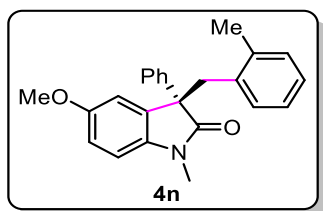

**(S)-5-methoxy-1-methyl-3-(2-methylbenzyl)-3-phenylindolin-2-one (4n)**

Yield: 84% (30.0 mg), ee = 95%,  $[\alpha]_D^{21} = -62.9$  (c = 1.5, CHCl<sub>3</sub>), <sup>1</sup>H NMR (400 MHz, CDCl<sub>3</sub>) δ 7.54 (d, *J* = 7.2 Hz, 2H), 7.35 (t, *J* = 6.8 Hz, 2H), 7.30 - 7.27 (m, 1H), 6.99 - 6.97 (m, 2H), 6.84 (td, *J* = 8.0, 2.4 Hz, 1H), 6.78 (dd, *J* = 8.4, 2.4 Hz, 1H), 6.69 (d, *J* = 7.6 Hz, 1H), 6.63 (d, *J* = 8.4 Hz, 1H), 6.54 (d, *J* = 2.4 Hz, 1H), 3.69 (s, 3H), 3.63 (d, *J* = 13.6 Hz, 1H), 3.58 (d, *J* = 13.6 Hz, 1H), 3.04 (s, 3H), 2.05 (s, 3H); <sup>13</sup>C NMR (101 MHz, CDCl<sub>3</sub>) δ 177.9, 155.3, 139.5, 137.3, 137.2, 134.5, 131.9, 130.1, 129.5, 128.5, 127.5, 127.4, 126.6, 125.1, 113.1, 113.0, 108.3, 57.9, 55.7, 39.8, 26.3, 20.1. HRMS (ESI) calcd. for C<sub>24</sub>H<sub>24</sub>NO<sub>2</sub> [M+H]<sup>+</sup>: 358.1802, found: 358.1820.

The ee of compound **4n** was determined by HPLC using an IC<sub>Daicel</sub> column (n-hexane/*i*-PrOH = 70/30, flow rate = 1.0 mL/min, λ = 254 nm, *t*<sub>major</sub> = 7.15 min, *t*<sub>minor</sub> = 9.64 min).

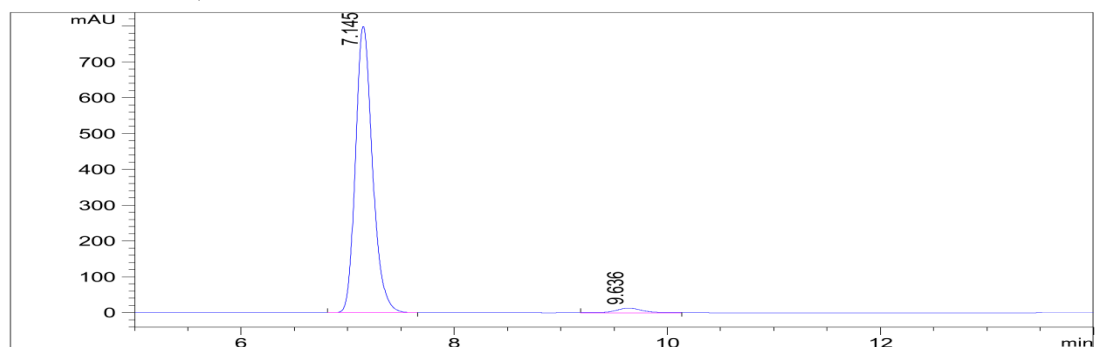

| # | Meas. RT [min] | Peak Type | Peak Height [mAU] | Peak Width [min] | Peak Area [mAU*s] | Peak Area % |
|---|----------------|-----------|-------------------|------------------|-------------------|-------------|
| 1 | 7.145          | MF        | 799.074           | 0.185            | 8860.623          | 97.730      |
| 2 | 9.636          | MM        | 12.474            | 0.275            | 205.782           | 2.270       |

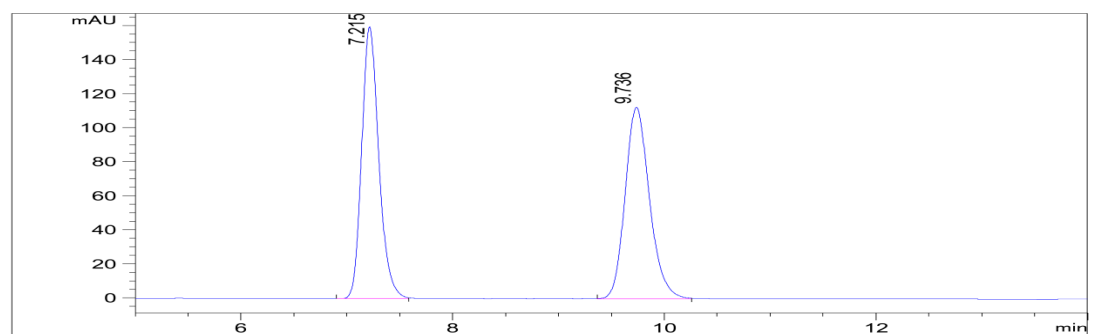

| # | Meas. RT [min] | Peak Type | Peak Height [mAU] | Peak Width [min] | Peak Area [mAU*s] | Peak Area % |
|---|----------------|-----------|-------------------|------------------|-------------------|-------------|
| 1 | 7.215          | MF        | 159.702           | 0.188            | 1798.854          | 49.980      |
| 2 | 9.736          | FM        | 112.464           | 0.267            | 1800.303          | 50.020      |

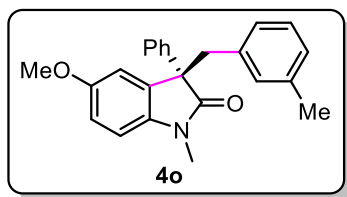

**(S)-5-methoxy-1-methyl-3-(3-methylbenzyl)-3-phenylindolin-2-one (4o)**

Yield: 60% (21.4 mg), ee = 99%,  $[\alpha]_D^{19} = -43.7$  (c = 1.2, CHCl<sub>3</sub>), <sup>1</sup>H NMR (400 MHz, CDCl<sub>3</sub>) δ 7.49 (d, *J* = 7.6 Hz, 2H), 7.34 (t, *J* = 7.2 Hz, 2H), 7.29 (d, *J* = 7.2 Hz, 1H), 6.93 - 6.85 (m, 2H), 6.79 (d, *J* = 2.4 Hz, 1H), 6.74 (dd, *J* = 8.4, 2.4 Hz, 1H), 6.67 - 6.64 (m, 2H), 6.52 (d, *J* = 8.4 Hz, 1H), 3.77 (s, 3H), 3.64 (d, *J* = 12.8 Hz, 1H), 3.41 (d, *J* = 12.8 Hz, 1H), 2.93 (s, 3H), 2.14 (s, 3H); <sup>13</sup>C NMR (101 MHz, CDCl<sub>3</sub>) δ 177.5, 155.6, 139.6, 137.4, 136.9, 135.6, 132.6, 130.8, 128.5, 127.4, 127.3, 127.1, 127.0, 112.9, 112.6, 108.2, 58.6, 55.9, 43.8, 26.1, 21.1. HRMS (ESI) calcd. For C<sub>24</sub>H<sub>24</sub>NO<sub>2</sub> [M+H]<sup>+</sup>: 358.1802, found: 358.1815.

The ee of compound **4o** was determined by HPLC using an IC<sub>Daicel</sub> column (n-hexane/*i*-PrOH = 70/30, flow rate = 1.0 mL/min, λ = 254 nm, *t*<sub>major</sub> = 8.03 min, *t*<sub>minor</sub> = 12.21 min).

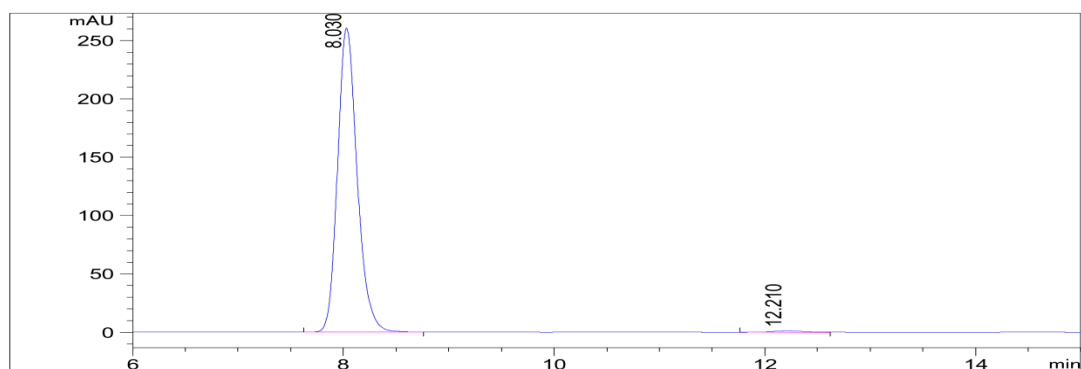

| # | Meas. RT [min] | Peak Type | Peak Height [mAU] | Peak Width [min] | Peak Area [mAU*s] | Peak Area % |
|---|----------------|-----------|-------------------|------------------|-------------------|-------------|
| 1 | 8.030          | FM        | 260.881           | 0.216            | 3379.753          | 99.268      |
| 2 | 12.210         | MF        | 1.185             | 0.351            | 24.927            | 0.732       |

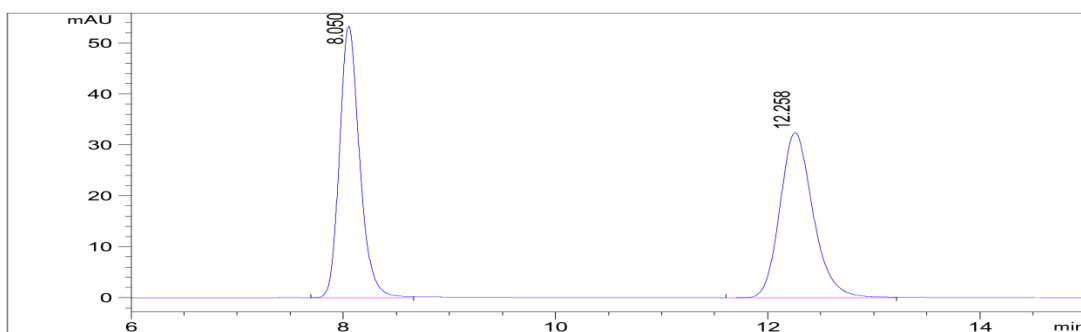

| # | Meas. RT [min] | Peak Type | Peak Height [mAU] | Peak Width [min] | Peak Area [mAU*s] | Peak Area % |
|---|----------------|-----------|-------------------|------------------|-------------------|-------------|
| 1 | 8.050          | MF        | 53.352            | 0.220            | 705.645           | 49.977      |
| 2 | 12.258         | MF        | 32.422            | 0.363            | 706.292           | 50.023      |

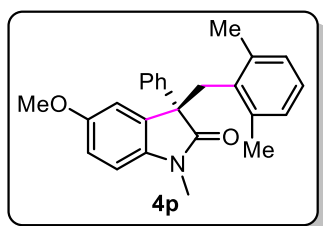

**(S)-3-(2,6-dimethylbenzyl)-5-methoxy-1-methyl-3-phenylindolin-2-one (4p)**

Yield: 68% (25.2 mg), ee = 90%,  $[\alpha]_D^{21} = -119.9$  (c = 1.3, CHCl<sub>3</sub>), <sup>1</sup>H NMR (400 MHz, CDCl<sub>3</sub>) δ 7.67 (dd, *J* = 8.4, 1.6 Hz, 2H), 7.32 - 7.27 (m, 3H), 6.98 (t, *J* = 7.2 Hz, 1H), 6.86 (d, *J* = 7.6 Hz, 2H), 6.84 - 6.81 (m, 1H), 6.74 (d, *J* = 8.4 Hz, 1H), 5.90 (d, *J* = 2.4 Hz, 1H), 3.86 (d, *J* = 14.4 Hz, 1H), 3.51 (s, 3H), 3.45 (d, *J* = 14.4 Hz, 1H), 3.17 (s, 3H), 1.60 (s, 6H); <sup>13</sup>C NMR (101 MHz, CDCl<sub>3</sub>) δ 178.8, 154.7, 140.0, 138.4, 137.2, 134.7, 129.7, 128.3, 128.1, 127.8, 127.3, 126.5, 114.0, 108.3, 55.9, 55.7, 39.2, 26.5, 20.6. HRMS (ESI) calcd. for C<sub>25</sub>H<sub>26</sub>NO<sub>2</sub> [M+H]<sup>+</sup>: 372.1958, found: 372.1969.

The ee of compound **4p** was determined by HPLC using an IA<sub>Daicel</sub> column (n-hexane/i-PrOH = 95/5, flow rate = 1.0 mL/min, λ = 254 nm, *t*<sub>major</sub> = 8.90 min, *t*<sub>minor</sub> = 10.92 min).

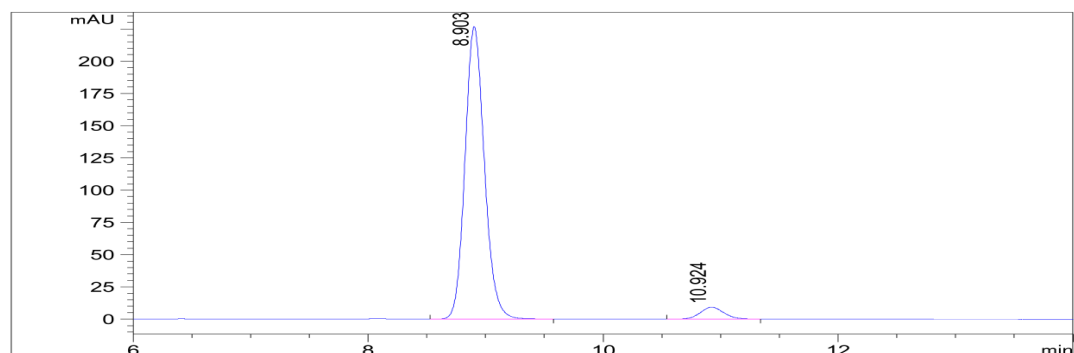

| # | Meas. RT [min] | Peak Type | Peak Height [mAU] | Peak Width [min] | Peak Area [mAU*s] | Peak Area % |
|---|----------------|-----------|-------------------|------------------|-------------------|-------------|
| 1 | 8.903          | MM        | 226.896           | 0.192            | 2616.286          | 95.356      |
| 2 | 10.924         | MM        | 9.178             | 0.231            | 127.412           | 4.644       |

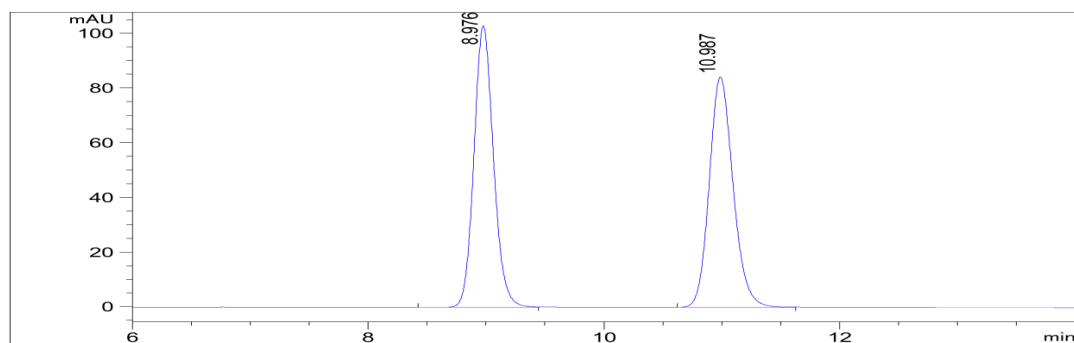

| # | Meas. RT [min] | Peak Type | Peak Height [mAU] | Peak Width [min] | Peak Area [mAU*s] | Peak Area % |
|---|----------------|-----------|-------------------|------------------|-------------------|-------------|
| 1 | 8.976          | MF        | 102.935           | 0.192            | 1187.917          | 50.012      |
| 2 | 10.987         | MF        | 84.336            | 0.235            | 1187.351          | 49.988      |

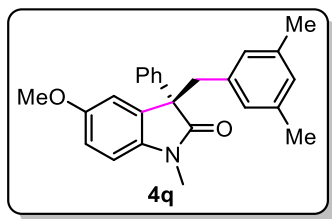

**(S)-3-(3,5-dimethylbenzyl)-5-methoxy-1-methyl-3-phenylindolin-2-one (4q)**

Yield: 90% (33.4 mg), ee = 93%,  $[\alpha]_D^{18} = -47.1$  (c = 1.8, CHCl<sub>3</sub>), <sup>1</sup>H NMR (400 MHz, CDCl<sub>3</sub>) δ 7.49 (d, *J* = 7.6 Hz, 2H), 7.34 (t, *J* = 6.8 Hz, 2H), 7.28 (d, *J* = 6.8 Hz, 1H), 6.78 (d, *J* = 2.0 Hz, 1H), 6.74 (d, *J* = 8.4 Hz, 1H), 6.68 (s, 1H), 6.53 (d, *J* = 8.4 Hz, 1H), 6.46 (s, 2H), 3.76 (s, 3H), 3.59 (d, *J* = 12.8 Hz, 1H), 3.37 (d, *J* = 12.8 Hz, 1H), 2.94 (s, 3H), 2.09 (s, 6H); <sup>13</sup>C NMR (101 MHz, CDCl<sub>3</sub>) δ 177.6, 155.5, 139.7, 137.5, 136.7, 135.5, 132.6, 128.5, 127.9, 127.8, 127.3, 113.1, 112.7, 108.1, 58.5, 56.0, 43.8, 26.1, 21.0. HRMS (ESI) calcd. for C<sub>25</sub>H<sub>26</sub>NO<sub>2</sub> [M+H]<sup>+</sup>: 372.1958, found: 372.1971.

The ee of compound **4q** was determined by HPLC using an IC<sub>Daicel</sub> column (n-hexane/*i*-PrOH = 80/20, flow rate = 1.0 mL/min, λ = 254 nm, *t*<sub>major</sub> = 9.75 min, *t*<sub>minor</sub> = 13.67 min).

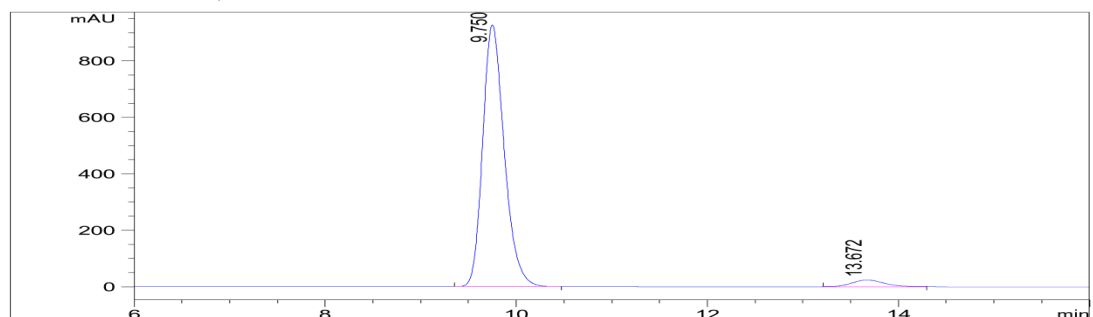

| # | Meas. RT [min] | Peak Type | Peak Height [mAU] | Peak Width [min] | Peak Area [mAU*s] | Peak Area % |
|---|----------------|-----------|-------------------|------------------|-------------------|-------------|
| 1 | 9.750          | MF        | 927.359           | 0.261            | 14549.935         | 96.435      |
| 2 | 13.672         | MF        | 23.631            | 0.379            | 537.813           | 3.565       |

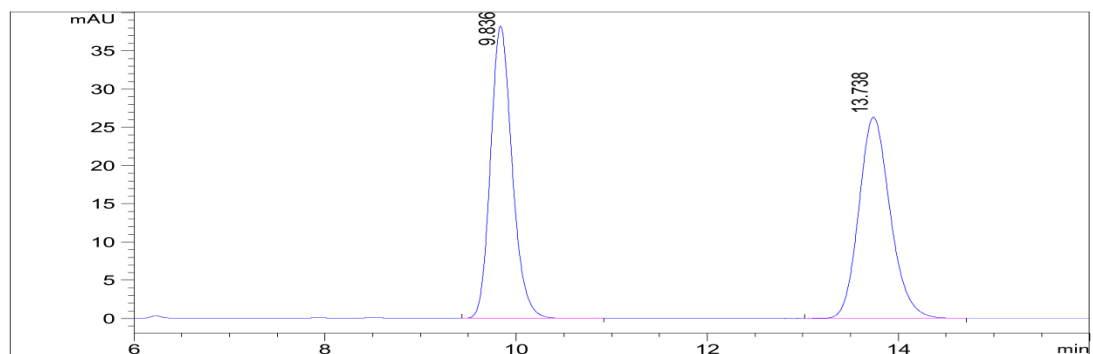

| # | Meas. RT [min] | Peak Type | Peak Height [mAU] | Peak Width [min] | Peak Area [mAU*s] | Peak Area % |
|---|----------------|-----------|-------------------|------------------|-------------------|-------------|
| 1 | 9.836          | BB        | 38.181            | 0.241            | 600.478           | 50.009      |
| 2 | 13.738         | BB        | 26.297            | 0.352            | 600.260           | 49.991      |

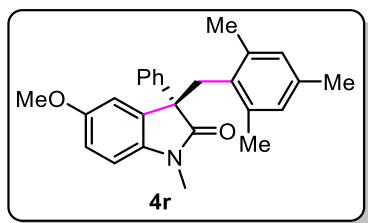

**(S)-5-methoxy-1-methyl-3-phenyl-3-(2,4,6-trimethylbenzyl)indolin-2-one (4r)**

Yield: 88% (33.9 mg), ee = 93%,  $[\alpha]_D^{21} = -113.0$  (c = 1.4, CHCl<sub>3</sub>), <sup>1</sup>H NMR (400 MHz, CDCl<sub>3</sub>) δ 7.68 (d, *J* = 7.2 Hz, 2H), 7.29 - 7.25 (m, 3H), 6.82 (d, *J* = 8.4 Hz, 1H), 6.74 (d, *J* = 8.4 Hz, 1H), 6.69 (s, 2H), 5.93 (s, 1H), 3.82 (d, *J* = 14.4 Hz, 1H), 3.51 (s, 3H), 3.39 (d, *J* = 14.4 Hz, 1H), 3.17 (s, 3H), 2.19 (s, 3H), 1.54 (s, 6H); <sup>13</sup>C NMR (101 MHz, CDCl<sub>3</sub>) δ 178.8, 154.6, 139.9, 138.3, 137.2, 135.8, 131.5, 129.9, 128.8, 128.2, 127.8, 127.2, 114.1, 114.0, 108.2, 56.0, 55.5, 38.9, 26.5, 20.7, 20.4. HRMS (ESI) calcd. for C<sub>26</sub>H<sub>28</sub>NO<sub>2</sub> [M+H]<sup>+</sup>: 386.2115, found: 386.2128.

The ee of compound **4r** was determined by HPLC using an IA<sub>Daicel</sub> column (n-hexane/*i*-PrOH = 98/2, flow rate = 1.0 mL/min, λ = 254 nm, *t*<sub>major</sub> = 10.46 min, *t*<sub>minor</sub> = 11.37 min).

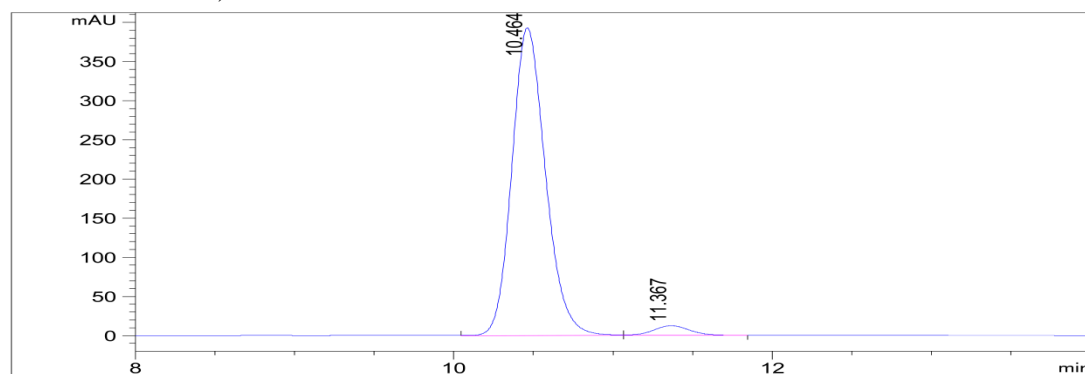

| # | Meas. RT [min] | Peak Type | Peak Height [mAU] | Peak Width [min] | Peak Area [mAU*s] | Peak Area % |
|---|----------------|-----------|-------------------|------------------|-------------------|-------------|
| 1 | 10.464         | FM        | 393.133           | 0.245            | 5769.271          | 96.559      |
| 2 | 11.367         | MF        | 12.583            | 0.272            | 205.600           | 3.441       |

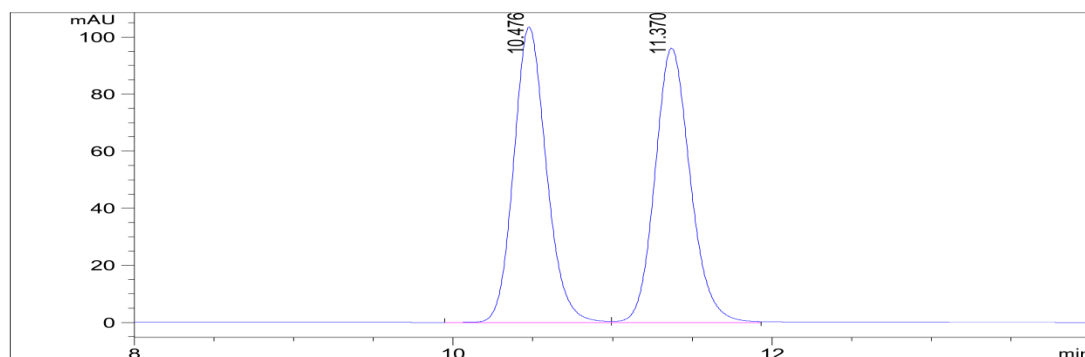

| # | Meas. RT [min] | Peak Type | Peak Height [mAU] | Peak Width [min] | Peak Area [mAU*s] | Peak Area % |
|---|----------------|-----------|-------------------|------------------|-------------------|-------------|
| 1 | 10.476         | BV        | 103.417           | 0.220            | 1471.273          | 49.913      |
| 2 | 11.370         | MF        | 96.060            | 0.256            | 1476.398          | 50.087      |

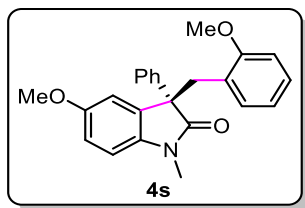

**(S)-5-methoxy-3-(2-methoxybenzyl)-1-methyl-3-phenylindolin-2-one (4s)**

Yield: 88% (32.8 mg), ee = 94%,  $[\alpha]_D^{21} = -105.9$  (c = 1.8, CHCl<sub>3</sub>), <sup>1</sup>H NMR (400 MHz, CDCl<sub>3</sub>) δ 7.48 (d, *J* = 7.2 Hz, 2H), 7.32 (t, *J* = 7.2 Hz, 2H), 7.27 (d, *J* = 7.2 Hz, 1H), 7.03 - 6.99 (m, 2H), 6.83 (d, *J* = 2.8 Hz, 1H), 6.70 - 6.66 (m, 2H), 6.54 (d, *J* = 8.4 Hz, 1H), 6.48 (d, *J* = 8.4 Hz, 1H), 3.85 (d, *J* = 12.8 Hz, 1H), 3.72 (s, 3H), 3.57 (d, *J* = 13.2 Hz, 1H), 3.54 (s, 3H), 3.03 (s, 3H); <sup>13</sup>C NMR (101 MHz, CDCl<sub>3</sub>) δ 178.2, 157.1, 155.1, 140.3, 137.2, 132.4, 130.5, 128.4, 127.8, 127.2, 124.7, 119.6, 113.6, 112.2, 109.7, 107.4, 58.4, 55.7, 54.6, 35.8, 26.2. HRMS (ESI) calcd. for C<sub>24</sub>H<sub>24</sub>NO<sub>3</sub> [M+H]<sup>+</sup>: 374.1751, found: 374.1765.

The ee of compound **4s** was determined by HPLC using an IC<sub>Daicel</sub> column (n-hexane/*i*-PrOH = 70/30, flow rate = 1.0 mL/min, λ = 254 nm, *t*<sub>major</sub> = 9.09 min, *t*<sub>minor</sub> = 13.82 min).

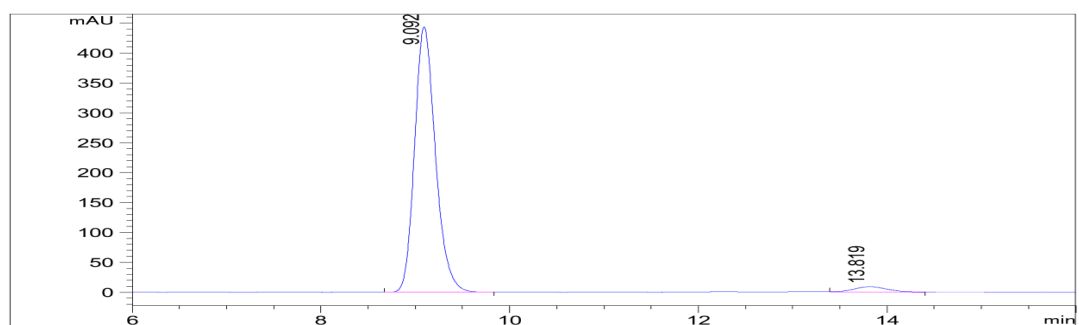

| # | Meas. RT [min] | Peak Type | Peak Height [mAU] | Peak Width [min] | Peak Area [mAU*s] | Peak Area % |
|---|----------------|-----------|-------------------|------------------|-------------------|-------------|
| 1 | 9.092          | FM        | 443.617           | 0.256            | 6822.427          | 96.908      |
| 2 | 13.819         | MM        | 8.887             | 0.408            | 217.707           | 3.092       |

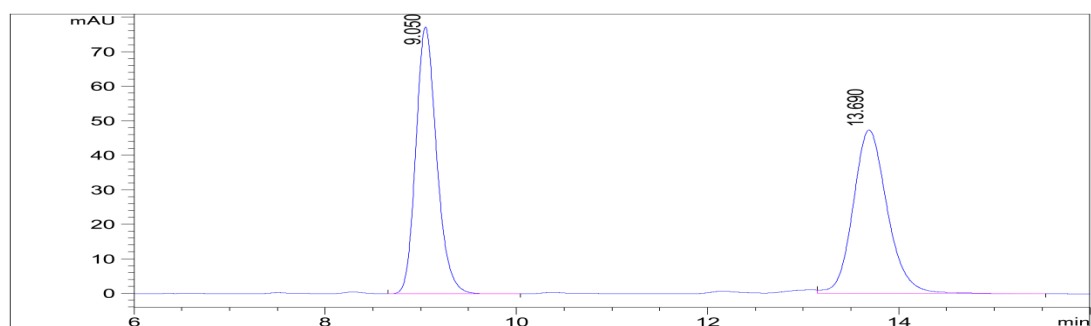

| # | Meas. RT [min] | Peak Type | Peak Height [mAU] | Peak Width [min] | Peak Area [mAU*s] | Peak Area % |
|---|----------------|-----------|-------------------|------------------|-------------------|-------------|
| 1 | 9.050          | VB        | 77.224            | 0.235            | 1170.555          | 49.889      |
| 2 | 13.690         | FM        | 47.338            | 0.414            | 1175.771          | 50.111      |

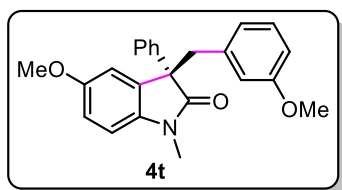

**(S)-5-methoxy-3-(3-methoxybenzyl)-1-methyl-3-phenylindolin-2-one (4t)**

Yield: 78% (27.8 mg), ee = 96%,  $[\alpha]_D^{18} = -49.4$  (c = 1.6, CHCl<sub>3</sub>), <sup>1</sup>H NMR (400 MHz, CDCl<sub>3</sub>) δ 7.50 (d, *J* = 7.6 Hz, 2H), 7.34 (t, *J* = 7.2 Hz, 2H), 7.29 (d, *J* = 7.2 Hz, 1H), 6.95 (t, *J* = 8.0 Hz, 1H), 6.79 - 6.74 (m, 2H), 6.62 (dd, *J* = 8.0, 2.4 Hz, 1H), 6.55 (d, *J* = 8.4 Hz, 1H), 6.50 (d, *J* = 7.2 Hz, 1H), 6.36 (s, 1H), 3.76 (s, 3H), 3.64 (d, *J* = 12.8 Hz, 1H), 3.57 (s, 3H), 3.44 (d, *J* = 12.8 Hz, 1H), 2.95 (s, 3H); <sup>13</sup>C NMR (101 MHz, CDCl<sub>3</sub>) δ 177.4, 158.7, 155.6, 139.6, 137.4, 137.2, 132.5, 128.6, 128.4, 127.4, 127.2, 122.6, 114.5, 113.1, 112.9, 112.6, 108.3, 58.5, 55.8, 54.9, 43.9, 26.1. HRMS (ESI) calcd. for C<sub>24</sub>H<sub>23</sub>NNaO<sub>2</sub> [M+Na]<sup>+</sup>: 380.1621, found: 380.1609.

The ee of compound **4t** was determined by HPLC using an IC<sub>Dai</sub>cel column (n-hexane/*i*-PrOH = 70/30, flow rate = 1.0 mL/min, λ = 254 nm, *t*<sub>major</sub> = 9.75 min, *t*<sub>minor</sub> = 14.51 min).

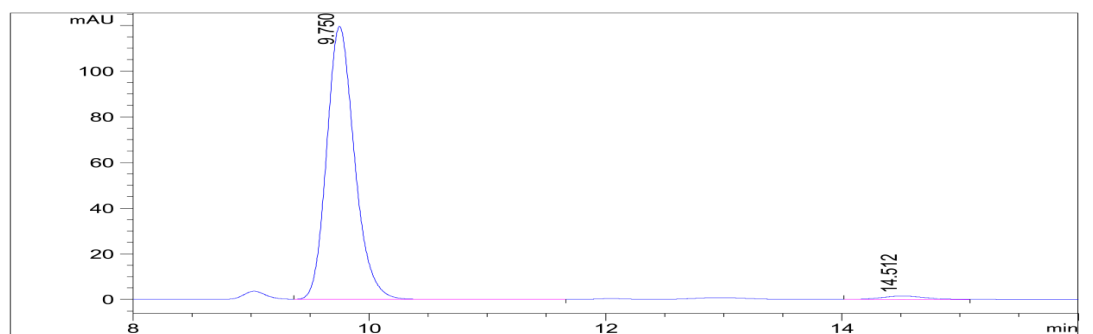

| # | Meas. RT [min] | Peak Type | Peak Height [mAU] | Peak Width [min] | Peak Area [mAU*s] | Peak Area % |
|---|----------------|-----------|-------------------|------------------|-------------------|-------------|
| 1 | 9.750          | VV R      | 119.522           | 0.253            | 1959.896          | 98.013      |
| 2 | 14.512         | FM        | 1.499             | 0.442            | 39.741            | 1.987       |

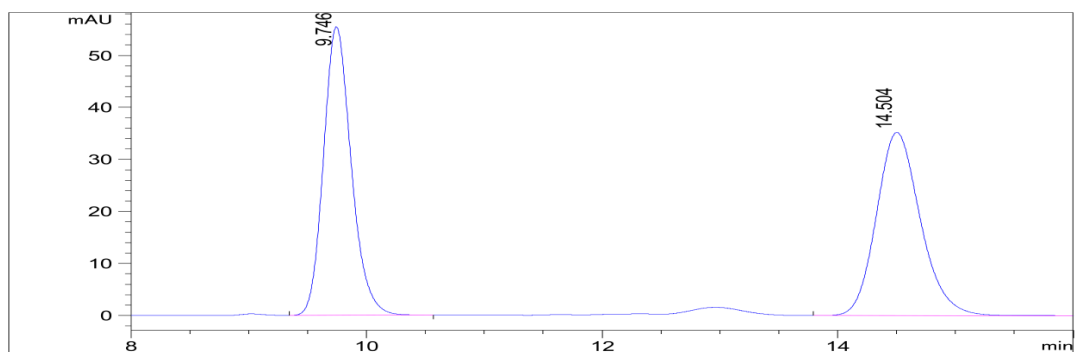

| # | Meas. RT [min] | Peak Type | Peak Height [mAU] | Peak Width [min] | Peak Area [mAU*s] | Peak Area % |
|---|----------------|-----------|-------------------|------------------|-------------------|-------------|
| 1 | 9.746          | BB        | 55.423            | 0.251            | 909.346           | 49.913      |
| 2 | 14.504         | BBA       | 35.208            | 0.398            | 912.524           | 50.087      |

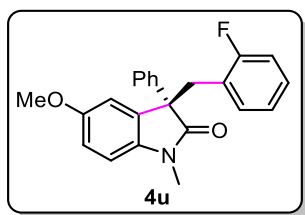

**(S)-3-(2-fluorobenzyl)-5-methoxy-1-methyl-3-phenylindolin-2-one (4u)**

Yield: 88% (31.8 mg), ee = 92%,  $[\alpha]_D^{21} = -64.0$  (c = 1.9, CHCl<sub>3</sub>), <sup>1</sup>H NMR (400 MHz, CDCl<sub>3</sub>) δ 7.48 (d, *J* = 8.0 Hz, 2H), 7.34 (t, *J* = 7.2 Hz, 2H), 7.29 (d, *J* = 7.2 Hz, 1H), 7.06 - 7.01 (m, 2H), 6.88 - 6.84 (m, 2H), 6.77 - 6.72 (m, 2H), 6.52 (d, *J* = 8.4 Hz, 1H), 3.76 (s, 3H), 3.68 (q, *J* = 13.2 Hz, 2H), 3.03 (s, 3H); <sup>13</sup>C NMR (101 MHz, CDCl<sub>3</sub>) δ 177.6, 160.7 (d, *J*<sub>CF</sub> = 244.4 Hz), 155.6, 139.7, 137.0, 131.8, 131.0 (d, *J*<sub>CF</sub> = 3.6 Hz), 128.6, 128.4 (d, *J*<sub>CF</sub> = 8.2 Hz), 127.5, 127.1, 123.4, 123.3 (d, *J*<sub>CF</sub> = 3.5 Hz), 114.8 (d, *J*<sub>CF</sub> = 23.1 Hz), 113.3, 112.7, 108.0, 58.1, 55.8, 35.3, 26.3. HRMS (ESI) calcd. for C<sub>23</sub>H<sub>21</sub>FNO<sub>2</sub> [M+H]<sup>+</sup>: 362.1551, found: 362.1565.

The ee of compound **4u** was determined by HPLC using an IC<sub>Daicel</sub> column (n-hexane/i-PrOH = 70/30, flow rate = 1.0 mL/min, λ = 254 nm, *t*<sub>major</sub> = 6.94 min, *t*<sub>minor</sub> = 11.39 min).

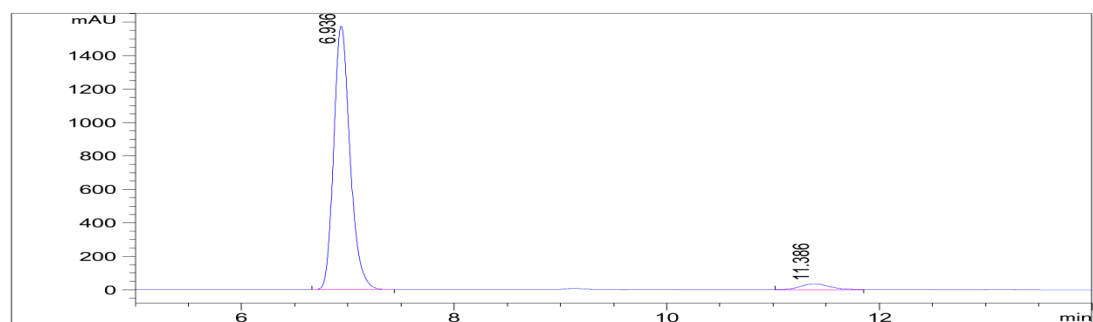

| # | Meas. RT [min] | Peak Type | Peak Height [mAU] | Peak Width [min] | Peak Area [mAU*s] | Peak Area % |
|---|----------------|-----------|-------------------|------------------|-------------------|-------------|
| 1 | 6.936          | MF        | 1576.772          | 0.178            | 16834.416         | 96.095      |
| 2 | 11.386         | MF        | 35.771            | 0.319            | 684.013           | 3.905       |

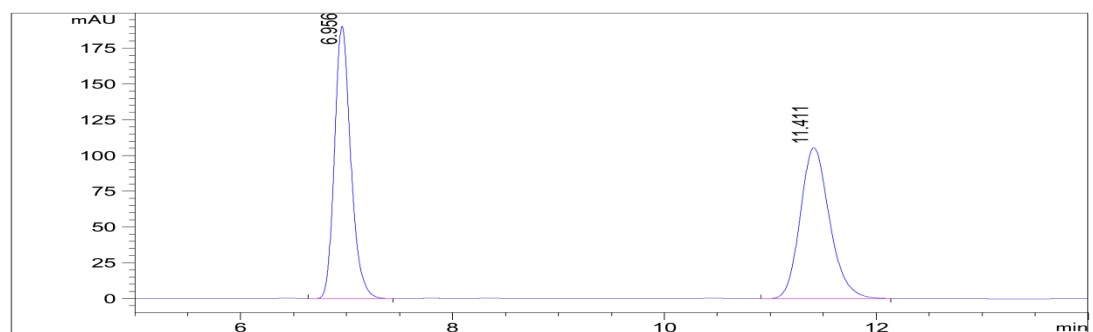

| # | Meas. RT [min] | Peak Type | Peak Height [mAU] | Peak Width [min] | Peak Area [mAU*s] | Peak Area % |
|---|----------------|-----------|-------------------|------------------|-------------------|-------------|
| 1 | 6.956          | FM        | 190.542           | 0.178            | 2034.535          | 49.974      |
| 2 | 11.411         | MF        | 105.662           | 0.321            | 2036.622          | 50.026      |



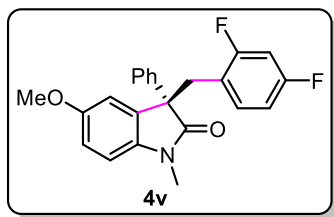

**(S)-3-(2,4-difluorobenzyl)-5-methoxy-1-methyl-3-phenylindolin-2-one (4v)**

Yield: 81% (30.7 mg), ee = 92%,  $[\alpha]_D^{20} = -62.9$  (c = 1.0, CHCl<sub>3</sub>), <sup>1</sup>H NMR (400 MHz, CDCl<sub>3</sub>) δ 7.46 (d, *J* = 7.6 Hz, 2H), 7.34 (t, *J* = 6.8 Hz, 2H), 7.29 (d, *J* = 6.8 Hz, 1H), 7.03 (q, *J* = 8.4 Hz, 1H), 6.89 (s, 1H), 6.75 (dd, *J* = 8.4, 2.4 Hz, 1H), 6.83 - 6.49 (m, 3H), 3.77 (s, 3H), 3.64 (s, 2H), 3.04 (s, 3H); <sup>13</sup>C NMR (101 MHz, CDCl<sub>3</sub>) δ 177.5, 160.7 (d, *J*<sub>CF</sub> = 258.8 Hz), 155.7, 139.5, 137.0, 131.8 (q, *J*<sub>CF</sub> = 5.4 Hz), 131.6, 128.6, 127.5, 127.0, 119.2 (d, *J*<sub>CF</sub> = 15.9 Hz), 113.3, 112.7, 110.5 (dd, *J*<sub>CF</sub> = 20.6, 3.4 Hz), 108.2, 103.2 (t, *J*<sub>CF</sub> = 25.9 Hz), 58.1, 55.8, 34.9, 26.3. HRMS (ESI) calcd. for C<sub>23</sub>H<sub>20</sub>F<sub>2</sub>NO<sub>2</sub> [M+H]<sup>+</sup>: 380.1457, found: 380.1463.

The ee of compound **4v** was determined by HPLC using an IC<sub>Daicel</sub> column (n-hexane/*i*-PrOH = 70/30, flow rate = 1.0 mL/min, λ = 254 nm, *t*<sub>major</sub> = 6.24 min, *t*<sub>minor</sub> = 10.67 min).

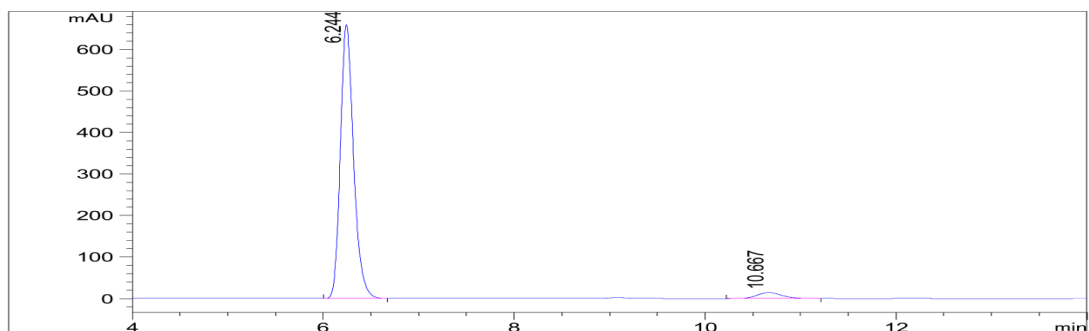

| # | Meas. RT [min] | Peak Type | Peak Height [mAU] | Peak Width [min] | Peak Area [mAU*s] | Peak Area % |
|---|----------------|-----------|-------------------|------------------|-------------------|-------------|
| 1 | 6.244          | MF        | 660.532           | 0.160            | 6341.875          | 96.045      |
| 2 | 10.667         | MM        | 14.450            | 0.301            | 261.127           | 3.955       |

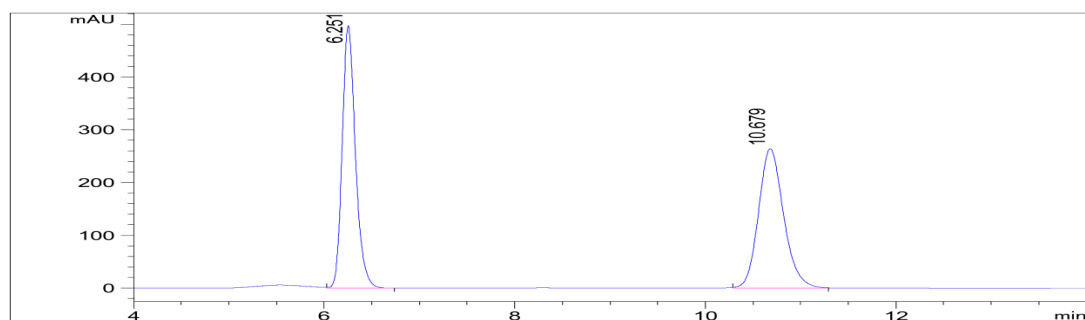

| # | Meas. RT [min] | Peak Type | Peak Height [mAU] | Peak Width [min] | Peak Area [mAU*s] | Peak Area % |
|---|----------------|-----------|-------------------|------------------|-------------------|-------------|
| 1 | 6.251          | FM        | 497.814           | 0.160            | 4790.893          | 49.754      |
| 2 | 10.679         | FM        | 264.246           | 0.305            | 4838.287          | 50.246      |

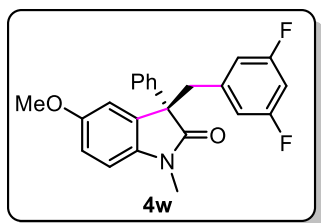

**(S)-3-(3,5-difluorobenzyl)-5-methoxy-1-methyl-3-phenylindolin-2-one (4w)**

Yield: 90% (34.1 mg), ee = 92%,  $[\alpha]_D^{21} = -45.7$  (c = 1.9, CHCl<sub>3</sub>), <sup>1</sup>H NMR (400 MHz, CDCl<sub>3</sub>) δ 7.46 (d, *J* = 7.6 Hz, 2H), 7.35 (t, *J* = 6.8 Hz, 2H), 7.31 - 7.27 (m, 1H), 6.81 - 6.77 (m, 2H), 6.61 (d, *J* = 8.4 Hz, 1H), 6.54 - 6.50 (m, 1H), 6.43 (dd, *J* = 8.4, 2.0 Hz, 2H), 3.78 (s, 3H), 3.68 (d, *J* = 12.8 Hz, 1H), 3.39 (d, *J* = 12.8 Hz, 1H), 3.00 (s, 3H); <sup>13</sup>C NMR (101 MHz, CDCl<sub>3</sub>) δ 177.0, 162.1 (dd, *J*<sub>CF</sub> = 246.1, 12.7 Hz), 155.8, 139.7 (t, *J*<sub>CF</sub> = 9.2 Hz), 139.1, 137.2, 131.8, 128.7, 127.7, 127.0, 112.8 (d, *J*<sub>CF</sub> = 24.8 Hz), 112.8 (d, *J*<sub>CF</sub> = 11.9 Hz), 112.8 (d, *J*<sub>CF</sub> = 1.0 Hz), 108.6, 102.1 (t, *J*<sub>CF</sub> = 25.1 Hz), 58.1, 55.9, 43.2, 26.2. HRMS (ESI) calcd. for C<sub>23</sub>H<sub>19</sub>F<sub>2</sub>NNaO<sub>2</sub> [M+Na]<sup>+</sup>: 402.1276, found: 402.1289.

The ee of compound **4w** was determined by HPLC using an IC<sub>Daicel</sub> column (n-hexane/i-PrOH = 70/30, flow rate = 1.0 mL/min, λ = 254 nm, *t*<sub>major</sub> = 5.97 min, *t*<sub>minor</sub> = 7.98 min).

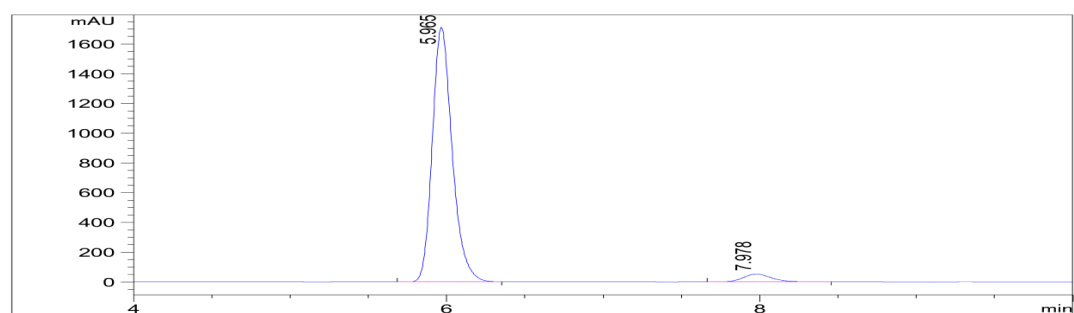

| # | Meas. RT [min] | Peak Type | Peak Height [mAU] | Peak Width [min] | Peak Area [mAU*s] | Peak Area % |
|---|----------------|-----------|-------------------|------------------|-------------------|-------------|
| 1 | 5.965          | MF        | 1711.746          | 0.147            | 15148.109         | 95.760      |
| 2 | 7.978          | MM        | 52.874            | 0.211            | 670.786           | 4.240       |

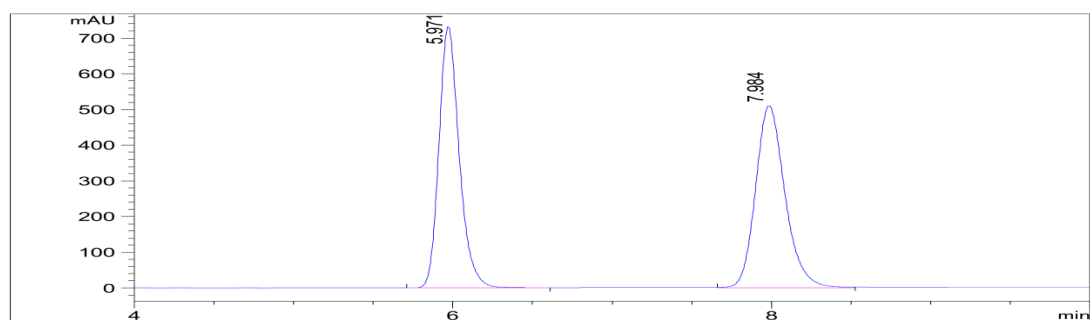

| # | Meas. RT [min] | Peak Type | Peak Height [mAU] | Peak Width [min] | Peak Area [mAU*s] | Peak Area % |
|---|----------------|-----------|-------------------|------------------|-------------------|-------------|
| 1 | 5.971          | BB        | 729.694           | 0.135            | 6470.240          | 49.728      |
| 2 | 7.984          | FM        | 510.536           | 0.214            | 6540.961          | 50.272      |

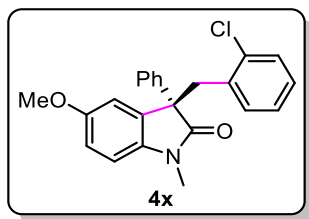

**(S)-3-(2-chlorobenzyl)-5-methoxy-1-methyl-3-phenylindolin-2-one (4x)**

Yield: 91% (34.3 mg), ee = 92%  $[\alpha]_D^{21} = -118.6$  (c = 2.1, CHCl<sub>3</sub>), <sup>1</sup>H NMR (400 MHz, CDCl<sub>3</sub>) δ 7.50 - 7.48 (m, 2H), 7.34 (t, *J* = 7.2 Hz, 2H), 7.30 - 7.28 (m, 1H), 7.14 - 7.12 (m, 1H), 7.06 (dd, *J* = 6.4, 2.0 Hz, 1H), 6.99 - 6.96 (m, 2H), 6.87 (d, *J* = 2.8 Hz, 1H), 6.73 (dd, *J* = 8.4, 2.8 Hz, 1H), 6.56 (d, *J* = 8.4 Hz, 1H), 3.91 (d, *J* = 13.2 Hz, 1H), 3.80 (d, *J* = 13.6 Hz, 1H), 3.73 (s, 3H), 3.09 (s, 3H); <sup>13</sup>C NMR (101 MHz, CDCl<sub>3</sub>) δ 177.8, 155.3, 139.7, 136.9, 134.7, 134.3, 131.2, 130.4, 129.3, 128.6, 127.9, 127.5, 127.2, 126.1, 113.5, 113.1, 108.1, 58.1, 55.8, 39.1, 26.4. HRMS (ESI) calcd. for C<sub>23</sub>H<sub>21</sub>ClNO<sub>2</sub> [M+H]<sup>+</sup>: 378.1255, found: 378.1270.

The ee of compound **4x** was determined by HPLC using an IC<sub>Daicel</sub> column (n-hexane/*i*-PrOH = 70/30, flow rate = 1.0 mL/min, λ = 254 nm, *t*<sub>major</sub> = 6.69 min, *t*<sub>minor</sub> = 9.98 min).

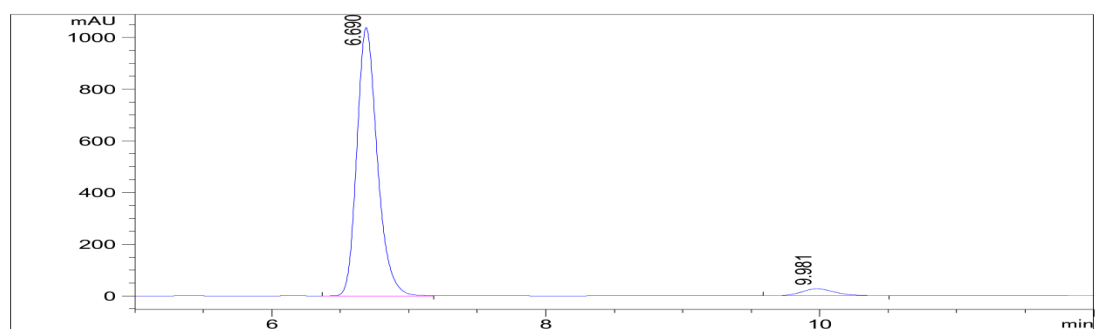

| # | Meas. RT [min] | Peak Type | Peak Height [mAU] | Peak Width [min] | Peak Area [mAU*s] | Peak Area % |
|---|----------------|-----------|-------------------|------------------|-------------------|-------------|
| 1 | 6.690          | MF        | 1040.195          | 0.172            | 10739.191         | 96.014      |
| 2 | 9.981          | MM        | 26.551            | 0.280            | 445.844           | 3.986       |

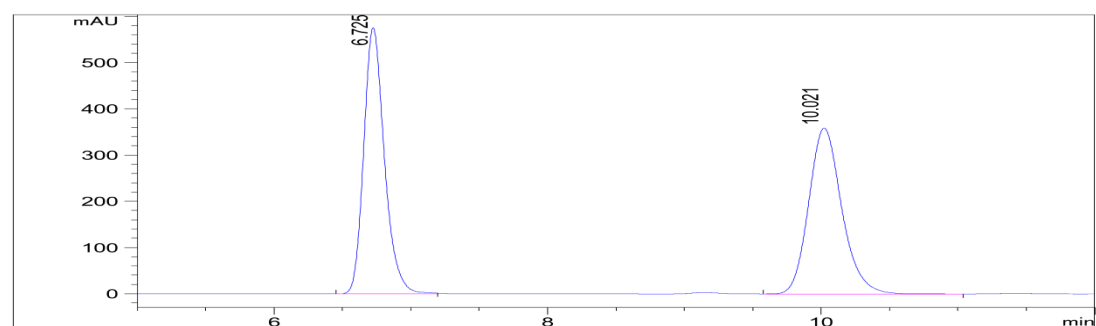

| # | Meas. RT [min] | Peak Type | Peak Height [mAU] | Peak Width [min] | Peak Area [mAU*s] | Peak Area % |
|---|----------------|-----------|-------------------|------------------|-------------------|-------------|
| 1 | 6.725          | MF        | 575.859           | 0.175            | 6032.608          | 50.038      |
| 2 | 10.021         | VB        | 358.616           | 0.258            | 6023.465          | 49.962      |

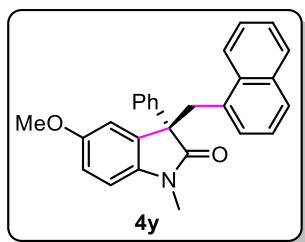

**(S)-5-methoxy-1-methyl-3-(naphthalen-1-ylmethyl)-3-phenylindolin-2-one (4y)**

Yield: 84% (33.0 mg), ee = 94%,  $[\alpha]_D^{21} = -72.4$  ( $c = 1.8$ ,  $\text{CHCl}_3$ ),  $^1\text{H NMR}$  (400 MHz,  $\text{CDCl}_3$ )  $\delta$  7.94 - 7.91 (m, 1H), 7.69 - 7.67 (m, 1H), 7.58 - 7.56 (m, 3H), 7.38 - 7.30 (m, 5H), 7.15 (t,  $J = 7.2$  Hz, 1H), 7.06 (d,  $J = 7.2$  Hz, 1H), 6.58 - 6.56 (m, 2H), 6.42 (d,  $J = 9.2$  Hz, 1H), 4.17 (d,  $J = 14.0$  Hz, 1H), 4.03 (d,  $J = 14.0$  Hz, 1H), 3.47 (s, 3H), 2.92 (s, 3H);  $^{13}\text{C NMR}$  (101 MHz,  $\text{CDCl}_3$ )  $\delta$  177.9, 155.1, 139.8, 137.1, 133.4, 132.4, 132.4, 131.6, 128.5, 128.2, 127.7, 127.4, 127.4, 127.3, 125.1, 125.1, 124.6, 124.4, 113.3, 113.3, 108.1, 58.3, 55.6, 39.0, 26.2. HRMS (ESI) calcd. for  $\text{C}_{27}\text{H}_{24}\text{NO}_2$   $[\text{M}+\text{H}]^+$ : 394.1802, found: 394.1819.

The ee of compound **4y** was determined by HPLC using an IC<sub>Daicel</sub> column (n-hexane/*i*-PrOH = 70/30, flow rate = 1.0 mL/min,  $\lambda = 254$  nm,  $t_{\text{major}} = 9.23$  min,  $t_{\text{minor}} = 12.45$  min).

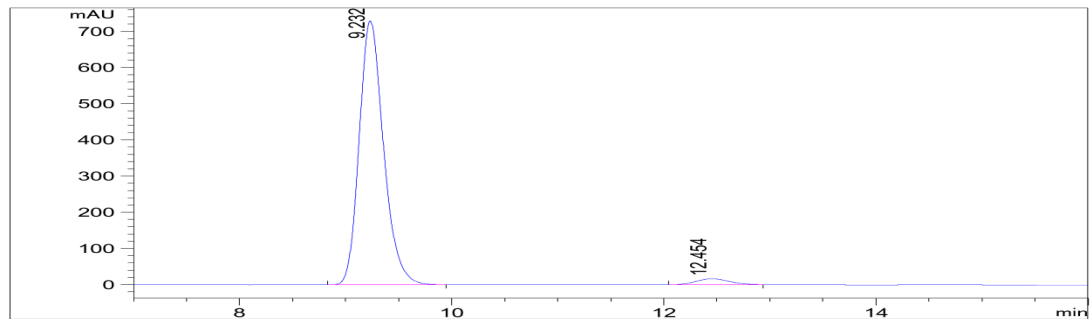

| # | Meas. RT [min] | Peak Type | Peak Height [mAU] | Peak Width [min] | Peak Area [mAU*s] | Peak Area % |
|---|----------------|-----------|-------------------|------------------|-------------------|-------------|
| 1 | 9.232          | MF        | 729.340           | 0.267            | 11670.873         | 96.884      |
| 2 | 12.454         | MF        | 16.614            | 0.377            | 375.385           | 3.116       |

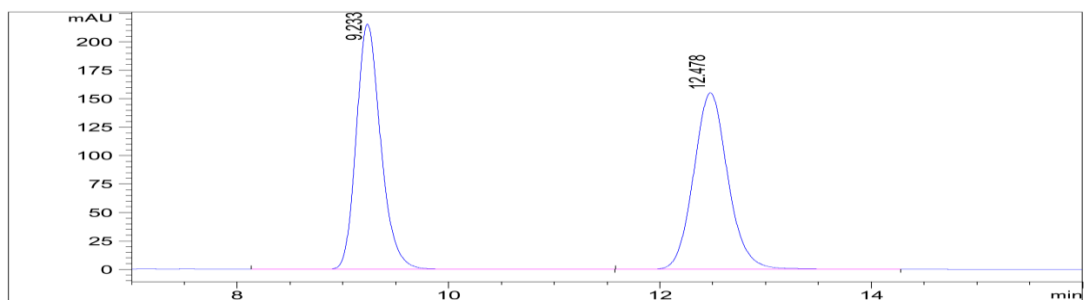

| # | Meas. RT [min] | Peak Type | Peak Height [mAU] | Peak Width [min] | Peak Area [mAU*s] | Peak Area % |
|---|----------------|-----------|-------------------|------------------|-------------------|-------------|
| 1 | 9.233          | VV R      | 215.444           | 0.248            | 3482.145          | 49.887      |
| 2 | 12.476         | BB        | 155.148           | 0.347            | 3497.906          | 50.113      |

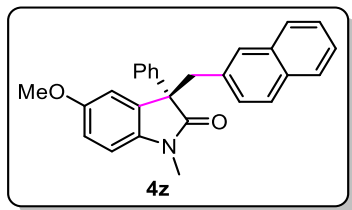

**(S)-5-methoxy-1-methyl-3-(naphthalen-2-ylmethyl)-3-phenylindolin-2-one (4z)**

Yield: 60% (23.6 mg), ee = 94%,  $[\alpha]_D^{21} = -25.9$  (c = 1.7, CHCl<sub>3</sub>), <sup>1</sup>H NMR (400 MHz, CDCl<sub>3</sub>) δ 7.68 (dd, *J* = 6.0, 3.6 Hz, 1H), 7.61 (dd, *J* = 6.0, 3.2 Hz, 1H), 7.54 - 7.49 (m, 3H), 7.38 - 7.34 (m, 5H), 7.32 - 7.30 (m, 1H), 6.98 (dd, *J* = 8.8, 2.0 Hz, 1H), 6.85 (d, *J* = 2.8 Hz, 1H), 6.69 (dd, *J* = 8.4, 2.4 Hz, 1H), 6.43 (d, *J* = 8.4 Hz, 1H), 3.86 (d, *J* = 12.8 Hz, 1H), 3.74 (s, 3H), 3.60 (d, *J* = 12.8 Hz, 1H), 2.87 (s, 3H); <sup>13</sup>C NMR (101 MHz, CDCl<sub>3</sub>) δ 177.5, 155.6, 139.7, 137.3, 133.3, 132.9, 132.4, 132.1, 128.8, 128.6, 128.3, 127.6, 127.5, 127.3, 127.2, 126.8, 125.6, 125.4, 112.9, 112.6, 108.4, 58.6, 55.9, 43.9, 26.1. HRMS (ESI) calcd. for C<sub>27</sub>H<sub>24</sub>NO<sub>2</sub> [M+H]<sup>+</sup>: 394.1802, found: 394.1811.

The ee of compound **4z** was determined by HPLC using an IC<sub>Daicel</sub> column (n-hexane/i-PrOH = 70/30, flow rate = 1.0 mL/min, λ = 254 nm, *t*<sub>major</sub> = 9.35 min, *t*<sub>minor</sub> = 13.12 min).

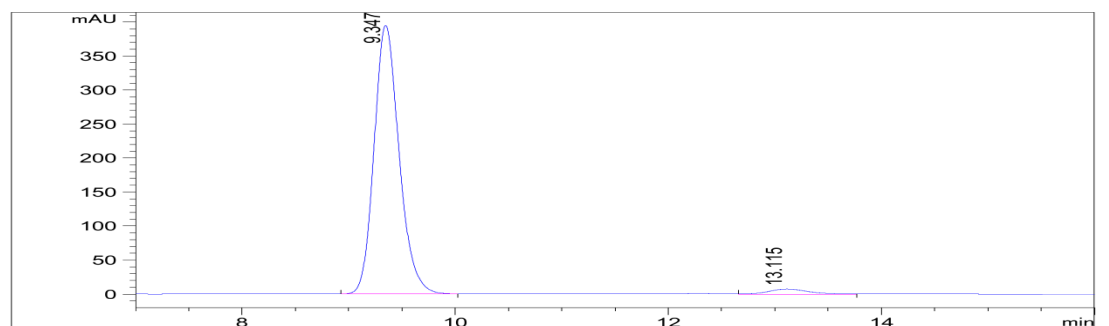

| # | Meas. RT [min] | Peak Type | Peak Height [mAU] | Peak Width [min] | Peak Area [mAU*s] | Peak Area % |
|---|----------------|-----------|-------------------|------------------|-------------------|-------------|
| 1 | 9.347          | FM        | 395.012           | 0.272            | 6452.605          | 97.136      |
| 2 | 13.115         | MM        | 7.486             | 0.424            | 190.240           | 2.864       |

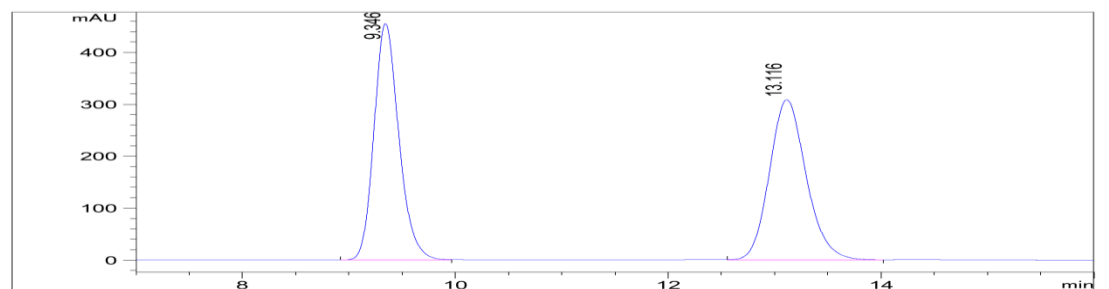

| # | Meas. RT [min] | Peak Type | Peak Height [mAU] | Peak Width [min] | Peak Area [mAU*s] | Peak Area % |
|---|----------------|-----------|-------------------|------------------|-------------------|-------------|
| 1 | 9.346          | FM        | 455.266           | 0.271            | 7416.220          | 49.949      |
| 2 | 13.116         | FM        | 308.882           | 0.401            | 7431.356          | 50.051      |

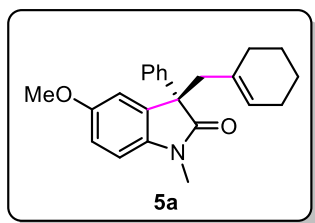

**(S)-3-(cyclohex-1-en-1-ylmethyl)-5-methoxy-1-methyl-3-phenylindolin-2-one (5a)**

Yield: 85% (29.5 mg), ee = 94%,  $[\alpha]_D^{27} = -18.67$  (c = 1.9, CHCl<sub>3</sub>), <sup>1</sup>H NMR (400 MHz, CDCl<sub>3</sub>) δ 7.41 - 7.39 (m, 2H), 7.31 - 7.27 (m, 2H), 7.26 - 7.21 (m, 1H), 6.86 - 6.83 (m, 2H), 6.76 (dd, *J* = 7.2, 1.6 Hz, 1H), 5.29 (s, 1H), 3.79 (s, 3H), 3.16 (s, 3H), 3.10 (d, *J* = 12.8 Hz, 1H), 2.82 (d, *J* = 13.2 Hz, 1H), 1.80 (s, 2H), 1.55 (d, *J* = 16.4 Hz, 1H), 1.39 - 1.35 (m, 1H), 1.34 - 1.28 (m, 4H); <sup>13</sup>C NMR (101 MHz, CDCl<sub>3</sub>) δ 178.2, 155.6, 140.4, 137.6, 133.2, 132.8, 128.4, 127.2, 127.0, 126.3, 113.2, 112.5, 108.2, 57.4, 55.9, 46.1, 29.7, 26.4, 25.4, 23.0, 22.0. HRMS (ESI) calcd. for C<sub>23</sub>H<sub>25</sub>NNaO<sub>2</sub> [M+Na]<sup>+</sup>: 370.1778, found: 370.1789.

The ee of compound **5a** was determined by HPLC using an IA<sub>Daicel</sub> column (n-hexane/*i*-PrOH = 90/10, flow rate = 1.0 mL/min, λ = 254 nm, *t*<sub>major</sub> = 8.23 min, *t*<sub>minor</sub> = 13.85 min).

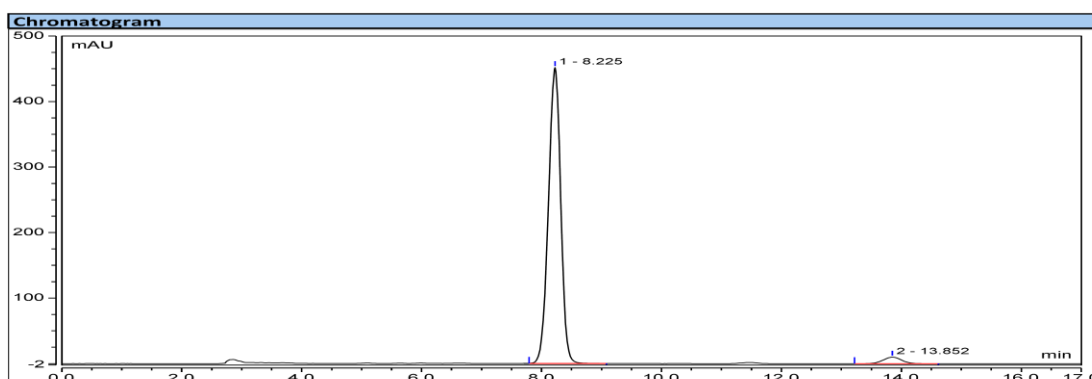

| Integration Results |           |                    |              |            |                 |                   |
|---------------------|-----------|--------------------|--------------|------------|-----------------|-------------------|
| No.                 | Peak Name | Retention Time min | Area mAU*min | Height mAU | Relative Area % | Relative Height % |
| 1                   |           | 8.225              | 107.256      | 451.852    | 96.78           | 97.85             |
| 2                   |           | 13.852             | 3.570        | 9.937      | 3.22            | 2.15              |

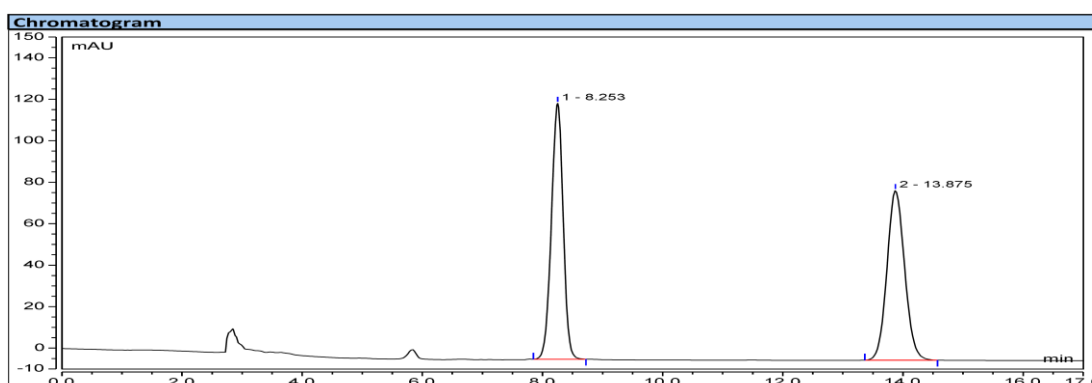

| Integration Results |           |                    |              |            |                 |                   |
|---------------------|-----------|--------------------|--------------|------------|-----------------|-------------------|
| No.                 | Peak Name | Retention Time min | Area mAU*min | Height mAU | Relative Area % | Relative Height % |
| 1                   |           | 8.253              | 27.976       | 123.363    | 50.01           | 60.12             |
| 2                   |           | 13.875             | 27.968       | 81.819     | 49.99           | 39.88             |

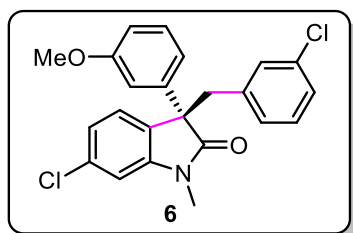

**(S)-6-chloro-3-(3-chlorobenzyl)-3-(3-methoxyphenyl)-1-methylindolin-2-one (6)**

Yield: 90% (37.1 mg), ee = 36%,  $[\alpha]_D^{32} = -23.2$  (c = 2.6,  $\text{CHCl}_3$ ),  $^1\text{H NMR}$  (400 MHz,  $\text{CDCl}_3$ )  $\delta$  7.26 (t,  $J = 8.0$  Hz, 1H), 7.09 (t,  $J = 8.0$  Hz, 2H), 7.05 - 7.01 (m, 2H), 6.97 (t,  $J = 8.0$  Hz, 2H), 6.85 - 6.82 (m, 2H), 6.72 (d,  $J = 7.6$  Hz, 1H), 6.65 (d,  $J = 1.6$  Hz, 1H), 3.78 (s, 3H), 3.65 (d,  $J = 12.8$ , 1H), 3.37 (d,  $J = 12.8$ , 1H), 2.96 (s, 3H);  $^{13}\text{C NMR}$  (101 MHz,  $\text{CDCl}_3$ )  $\delta$  177.3, 159.7, 144.8, 140.3, 137.3, 134.1, 133.3, 129.8, 129.7, 129.0, 128.8, 128.1, 126.9, 126.2, 122.1, 119.4, 113.6, 112.5, 108.9, 57.6, 55.2, 43.2, 26.2.

The ee of compound **6** was determined by HPLC using an IC<sub>Daicel</sub> column (n-hexane/i-PrOH = 80/20, flow rate = 1.0 mL/min,  $\lambda = 254$  nm,  $t_{\text{major}} = 9.65$  min,  $t_{\text{minor}} = 11.49$  min).

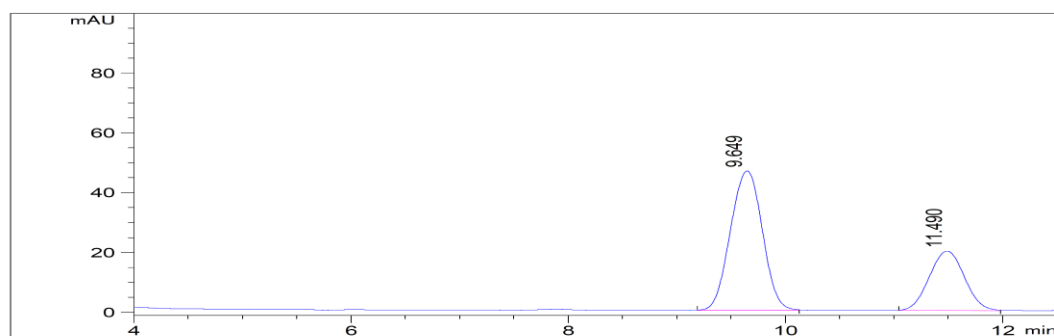

| # | Meas. RT [min] | Peak Type | Peak Height [mAU] | Peak Width [min] | Peak Area [mAU*s] | Peak Area % |
|---|----------------|-----------|-------------------|------------------|-------------------|-------------|
| 1 | 9.649          | FM        | 46.600            | 0.341            | 954.374           | 68.127      |
| 2 | 11.490         | MF        | 19.867            | 0.375            | 446.498           | 31.873      |

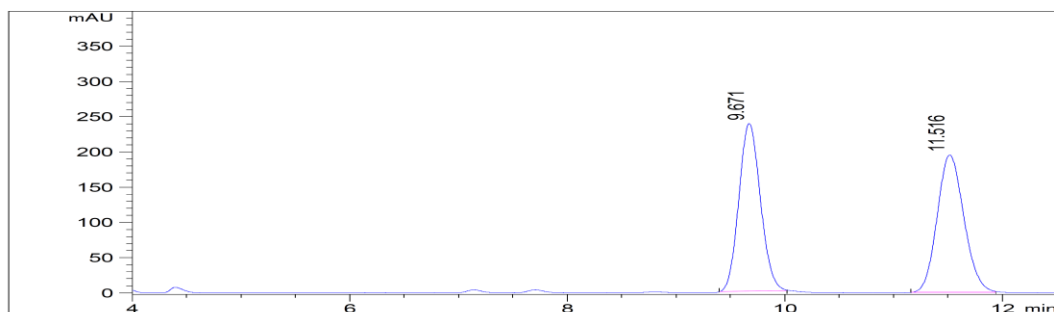

| # | Meas. RT [min] | Peak Type | Peak Height [mAU] | Peak Width [min] | Peak Area [mAU*s] | Peak Area % |
|---|----------------|-----------|-------------------|------------------|-------------------|-------------|
| 1 | 9.671          | MM        | 237.963           | 0.230            | 3276.904          | 49.607      |
| 2 | 11.516         | MM        | 195.024           | 0.284            | 3328.817          | 50.393      |

## 7. X-ray structure of **3o** and parameters.

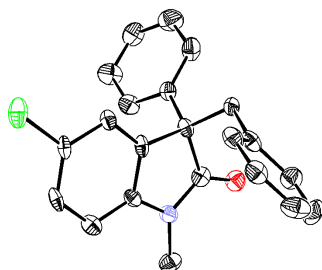

X-ray of **3o** (CCDC: 2174890)

|                                        |                                        |
|----------------------------------------|----------------------------------------|
| Bond precision                         | C-C = 0.0161 Å                         |
|                                        | Wavelength = 0.71073                   |
| Cell                                   | a = 9.050 (4) $\alpha$ = 96.353 (8)    |
|                                        | b = 9.105 (4) $\beta$ = 93.200 (7)     |
|                                        | c = 11.832 (5) $\gamma$ = 111.089 (7)  |
| Temperature                            | 296 K                                  |
| Volume                                 | 899.3 (6)                              |
| Space group                            | P 1                                    |
| Sum formula                            | C <sub>22</sub> H <sub>18</sub> Cl N O |
| Mr                                     | 347.82                                 |
| D <sub>x</sub> , g cm <sup>-3</sup>    | 1.284                                  |
| Z                                      | 1                                      |
| Mu (mm <sup>-1</sup> )                 | 0.221                                  |
| F <sub>000</sub>                       | 364.0                                  |
| h,k,lmax                               | 11, 11, 14                             |
| Nref                                   | 3950                                   |
| Tmin,Tmax                              | 0.528, 0.745                           |
| Correction method= # Reported T Limits | Tmin = 0.528    Tmax = 0.745           |
| AbsCorr = MULTT-SCAN                   |                                        |
| Data completeness                      | 1.12/0.56                              |
| Theta(max)                             | 25.981                                 |
| R(reflections)                         | 0.0690 (2104)                          |
| wR2(reflections)                       | 0.1990 (3950)                          |
| S                                      | 1.029                                  |
| Npar                                   | 454                                    |



## 8. Copies of $^1\text{H}$ and $^{13}\text{C}$ NMR spectra

$^1\text{H}$  NMR (400 MHz,  $\text{CDCl}_3$ ) of compound **3a**

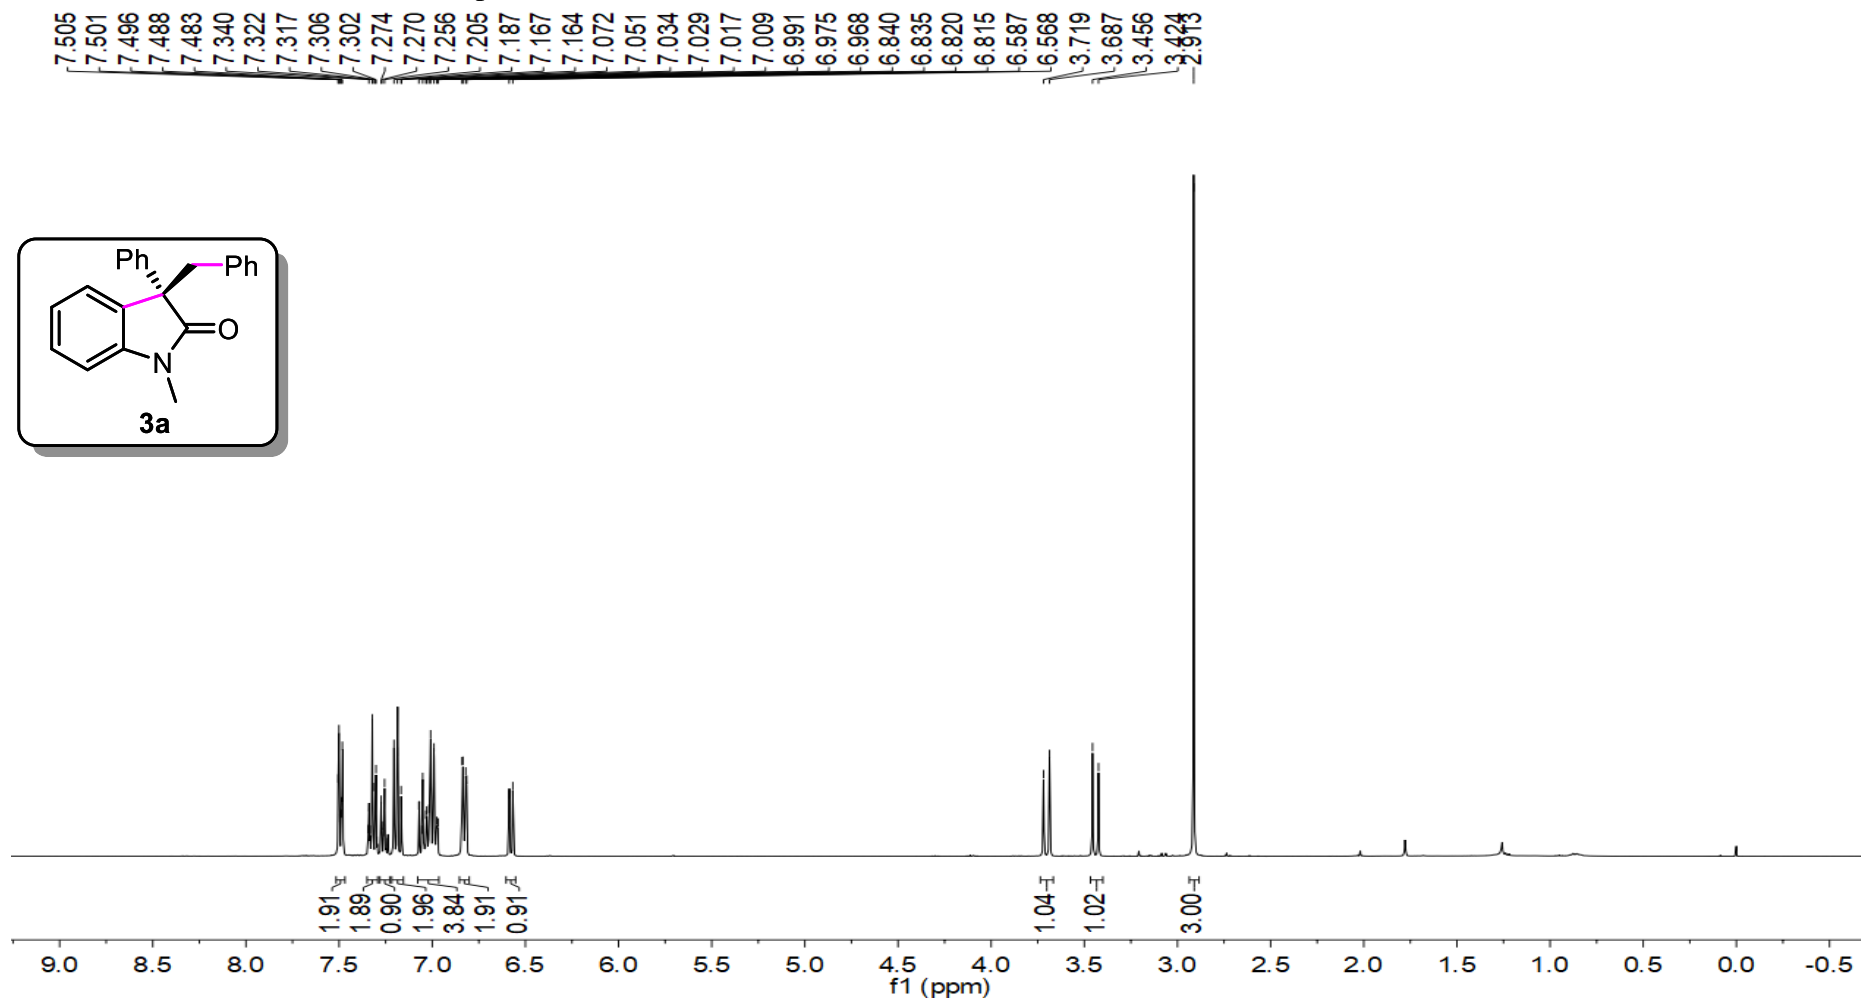

$^{13}\text{C}$  NMR (101 MHz,  $\text{CDCl}_3$ ) of compound **3a**

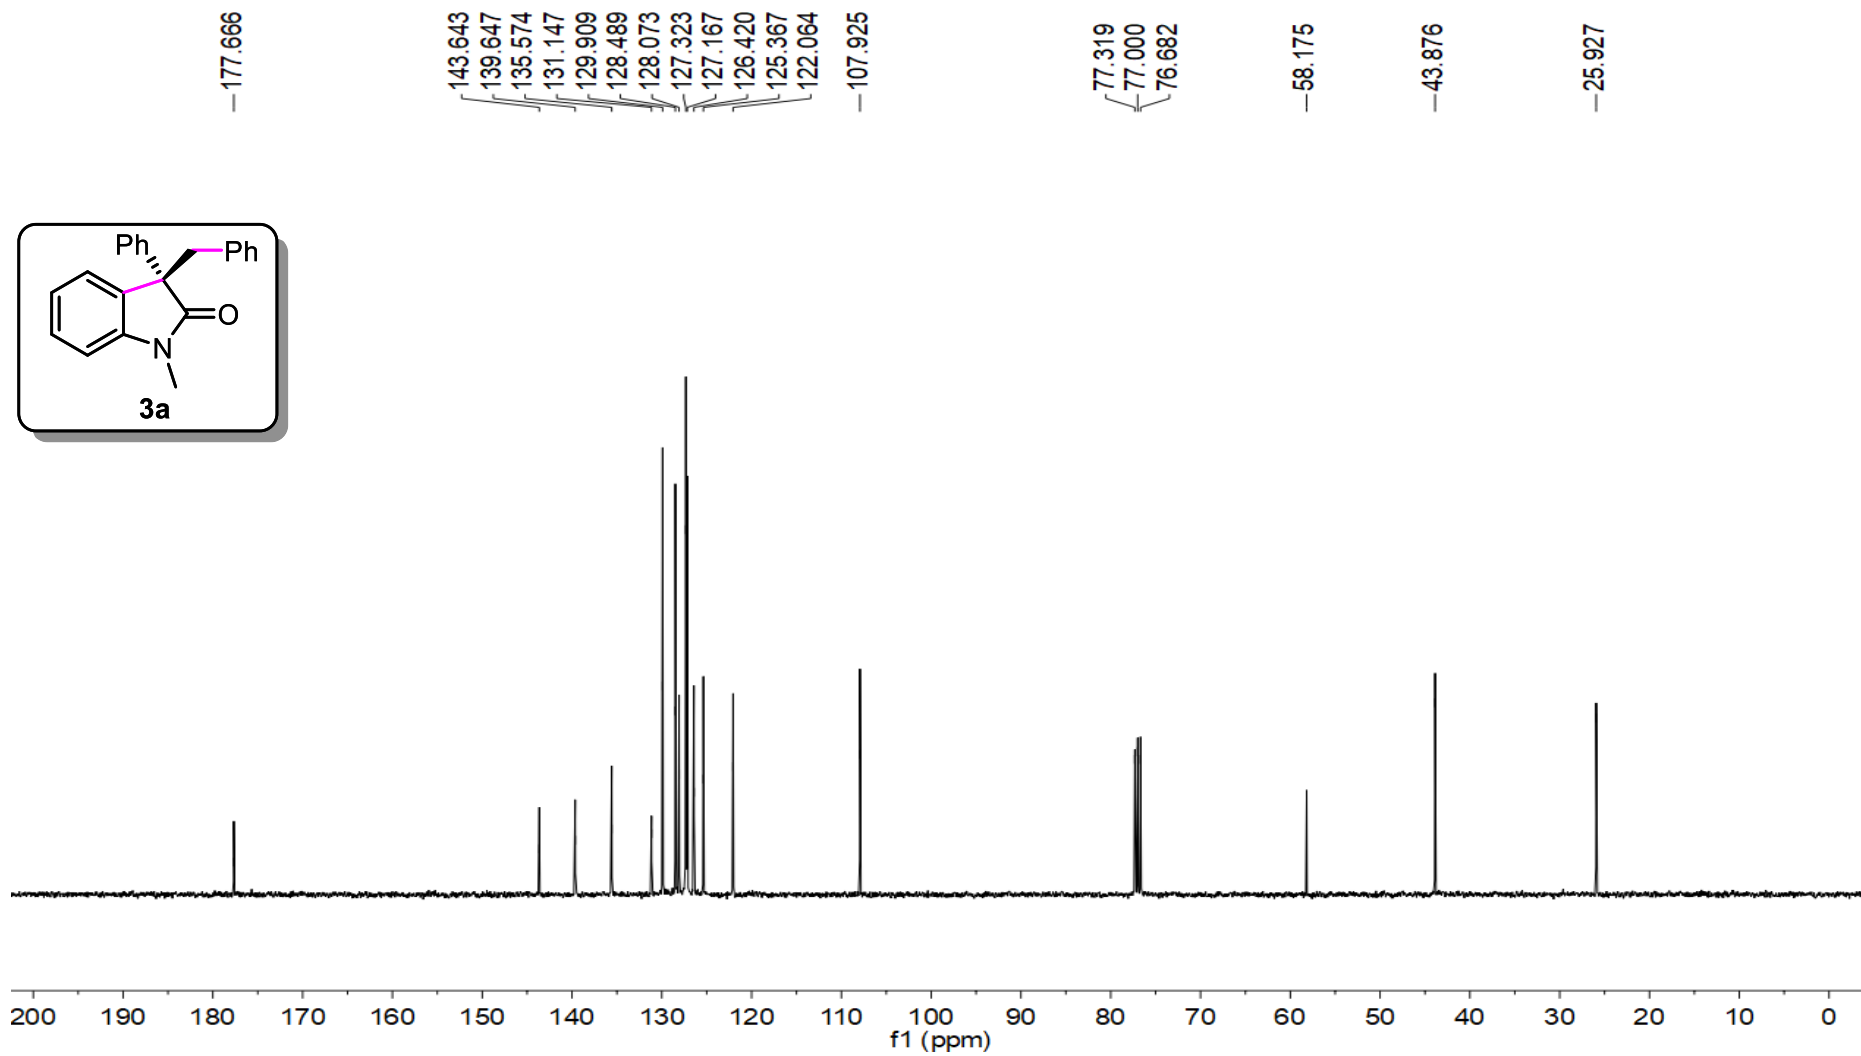

$^1\text{H}$  NMR (400 MHz,  $\text{CDCl}_3$ ) of compound **3b**

7.477  
7.360  
7.342  
7.323  
7.292  
7.274  
7.248  
— 6.992  
— 6.812  
— 6.499  
— 6.478

3.695  
— 3.663  
— 3.458  
3.426  
— 2.911  
— 2.344

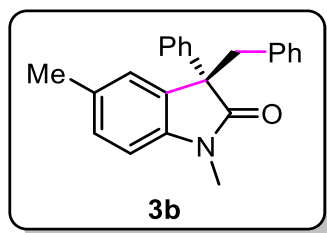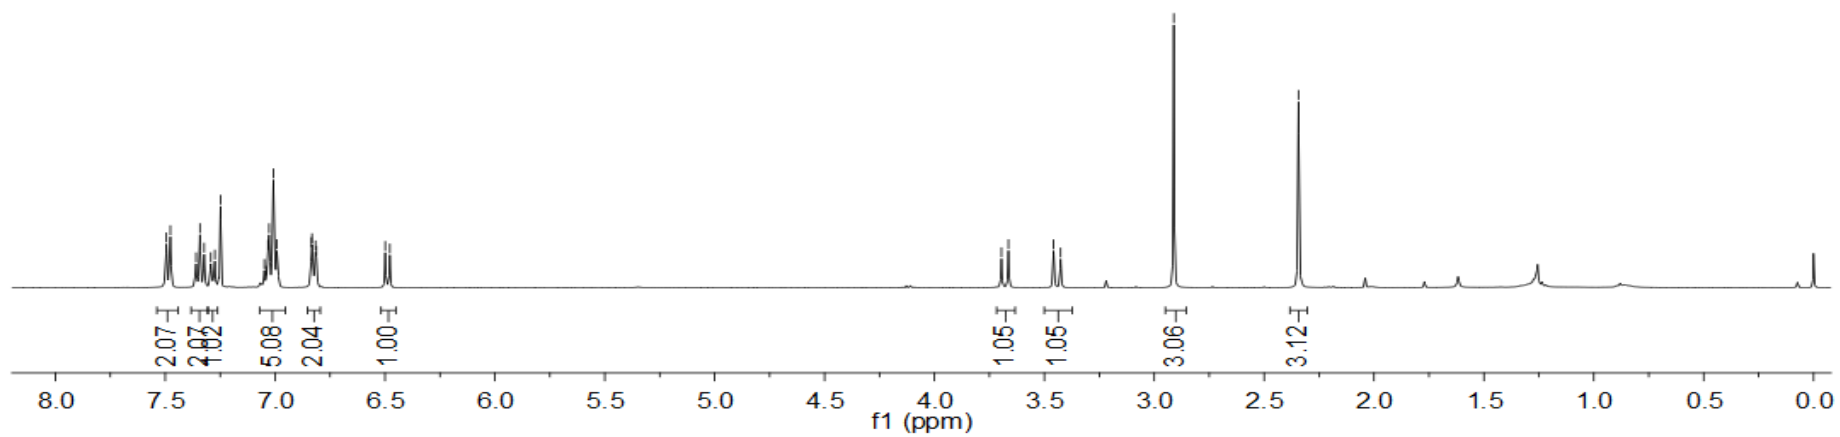

$^{13}\text{C}$  NMR (101 MHz,  $\text{CDCl}_3$ ) of compound **3b**

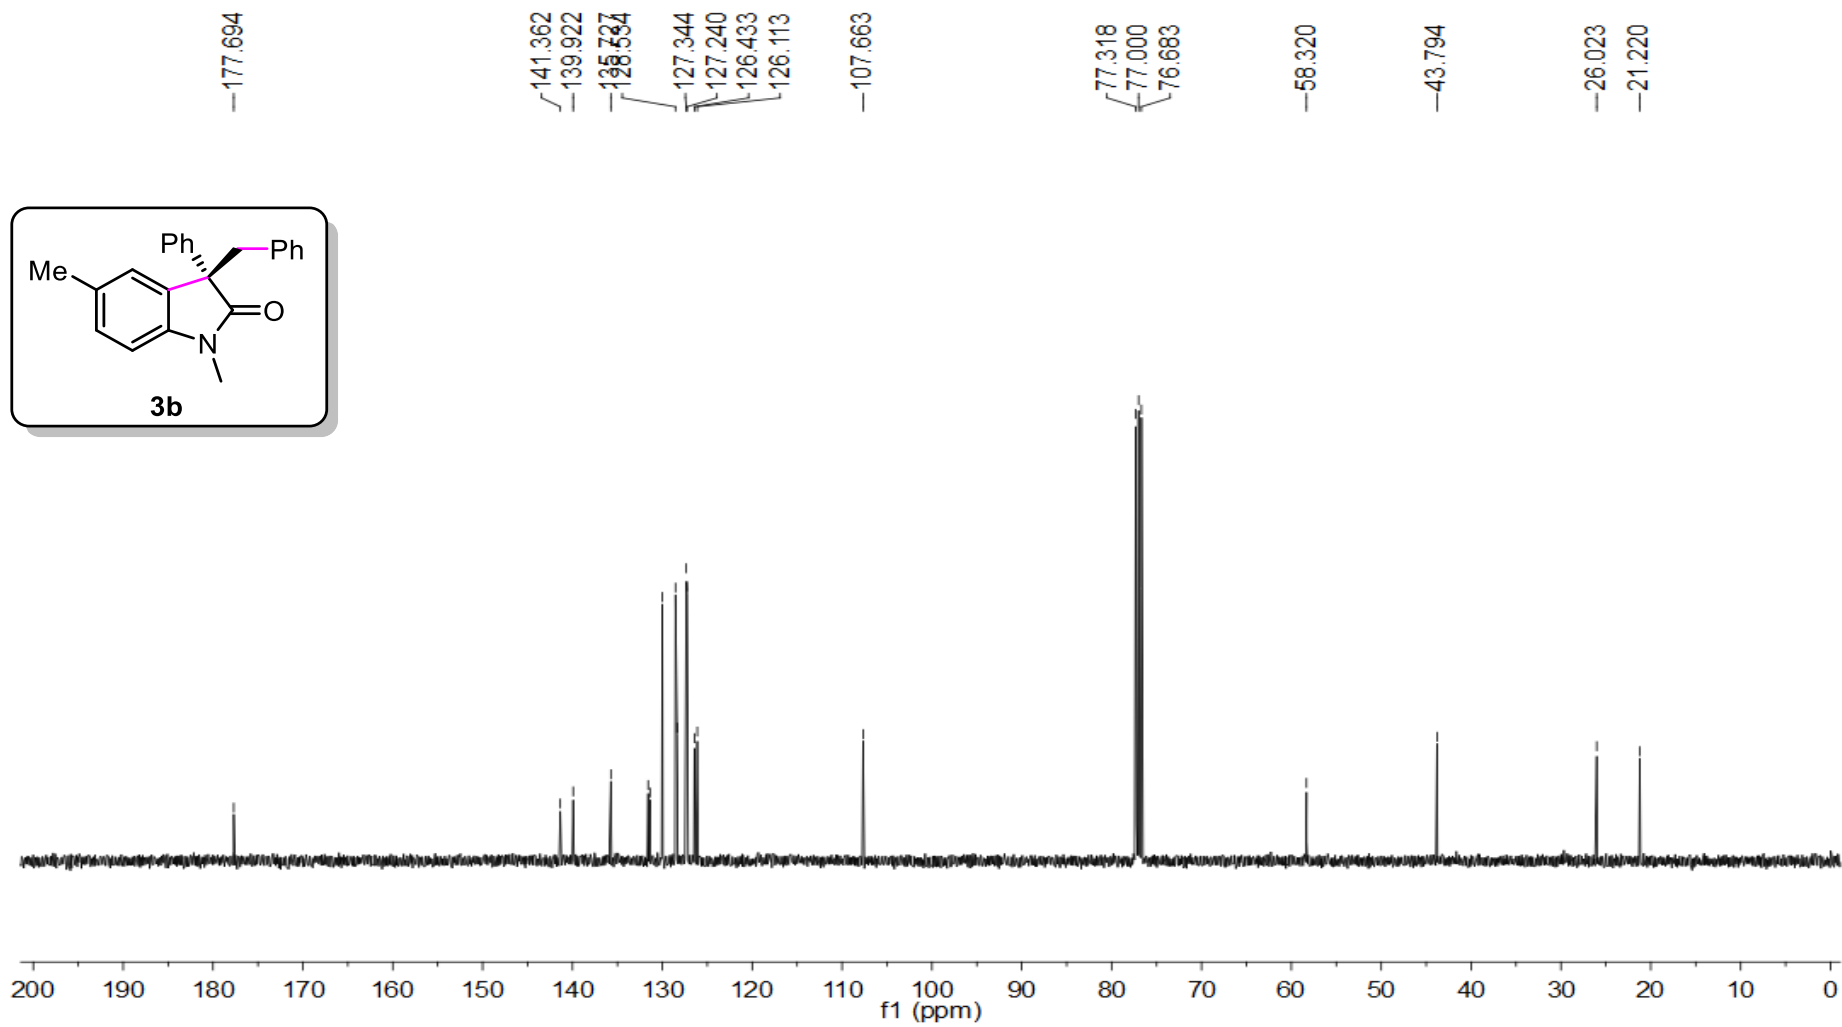

<sup>1</sup>H NMR (400 MHz, CDCl<sub>3</sub>) of compound **3c**

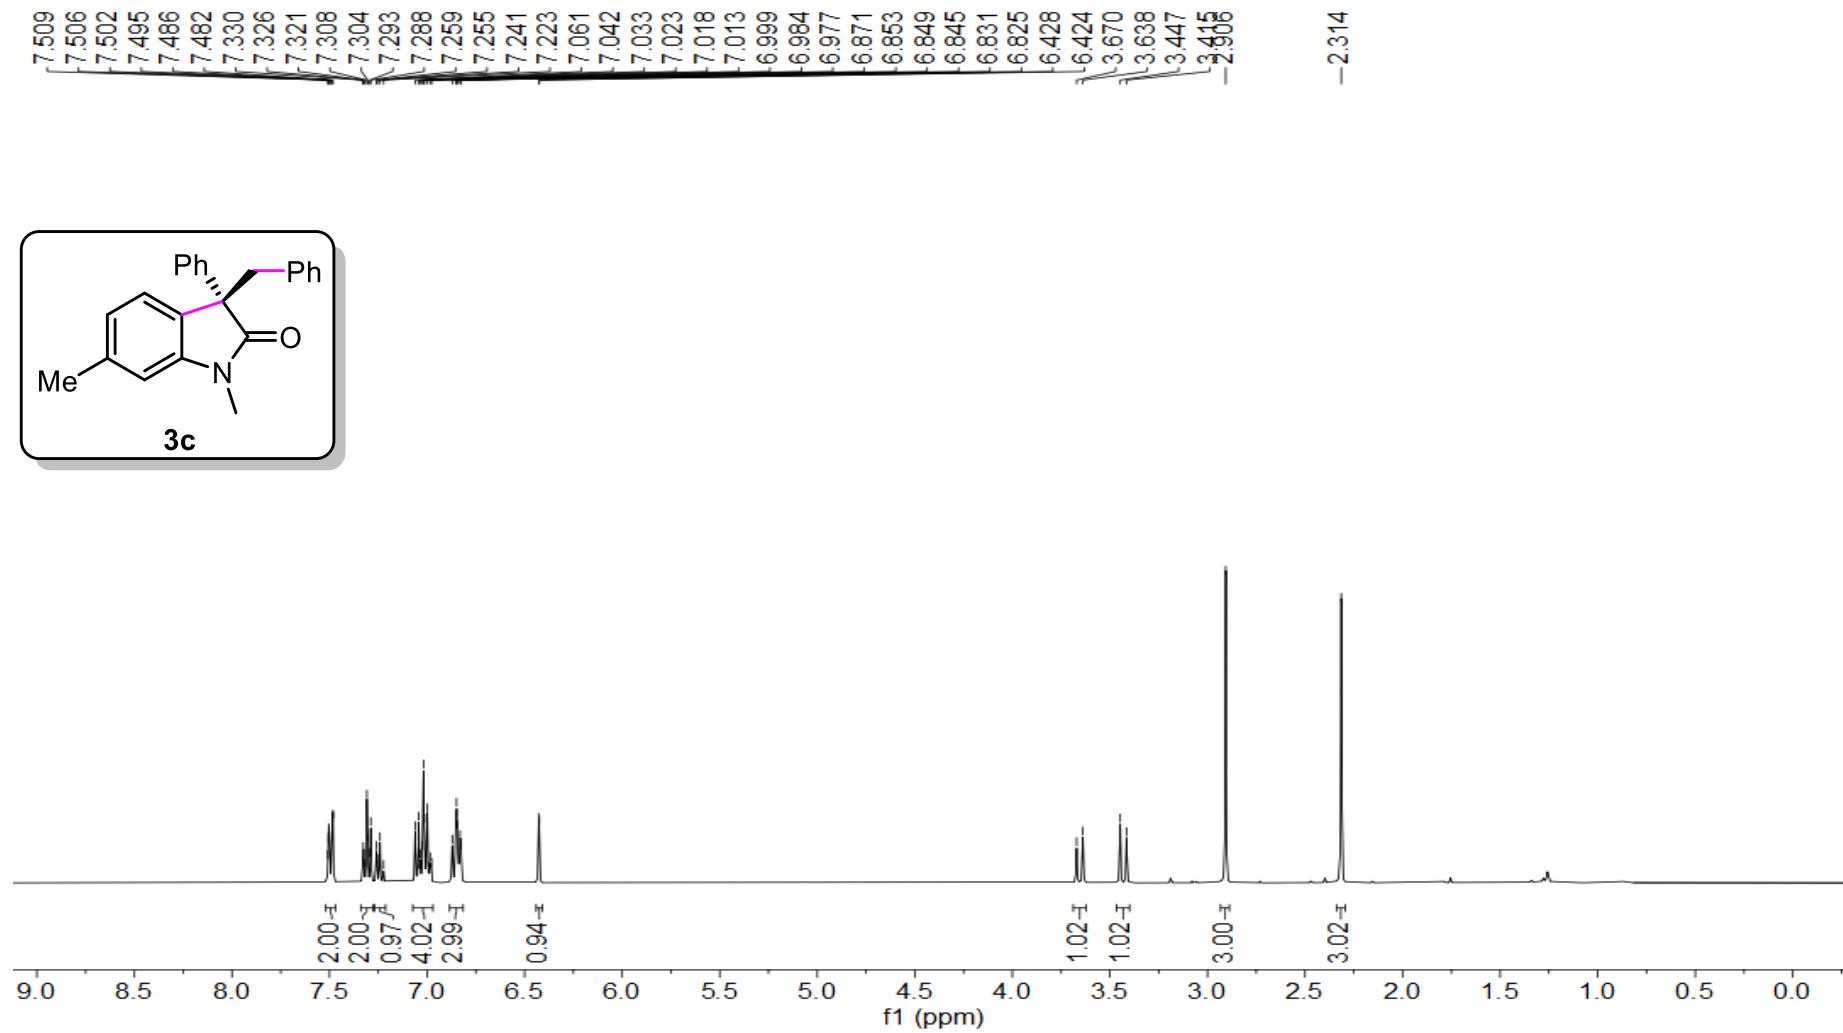

$^{13}\text{C}$  NMR (101 MHz,  $\text{CDCl}_3$ ) of compound **3c**

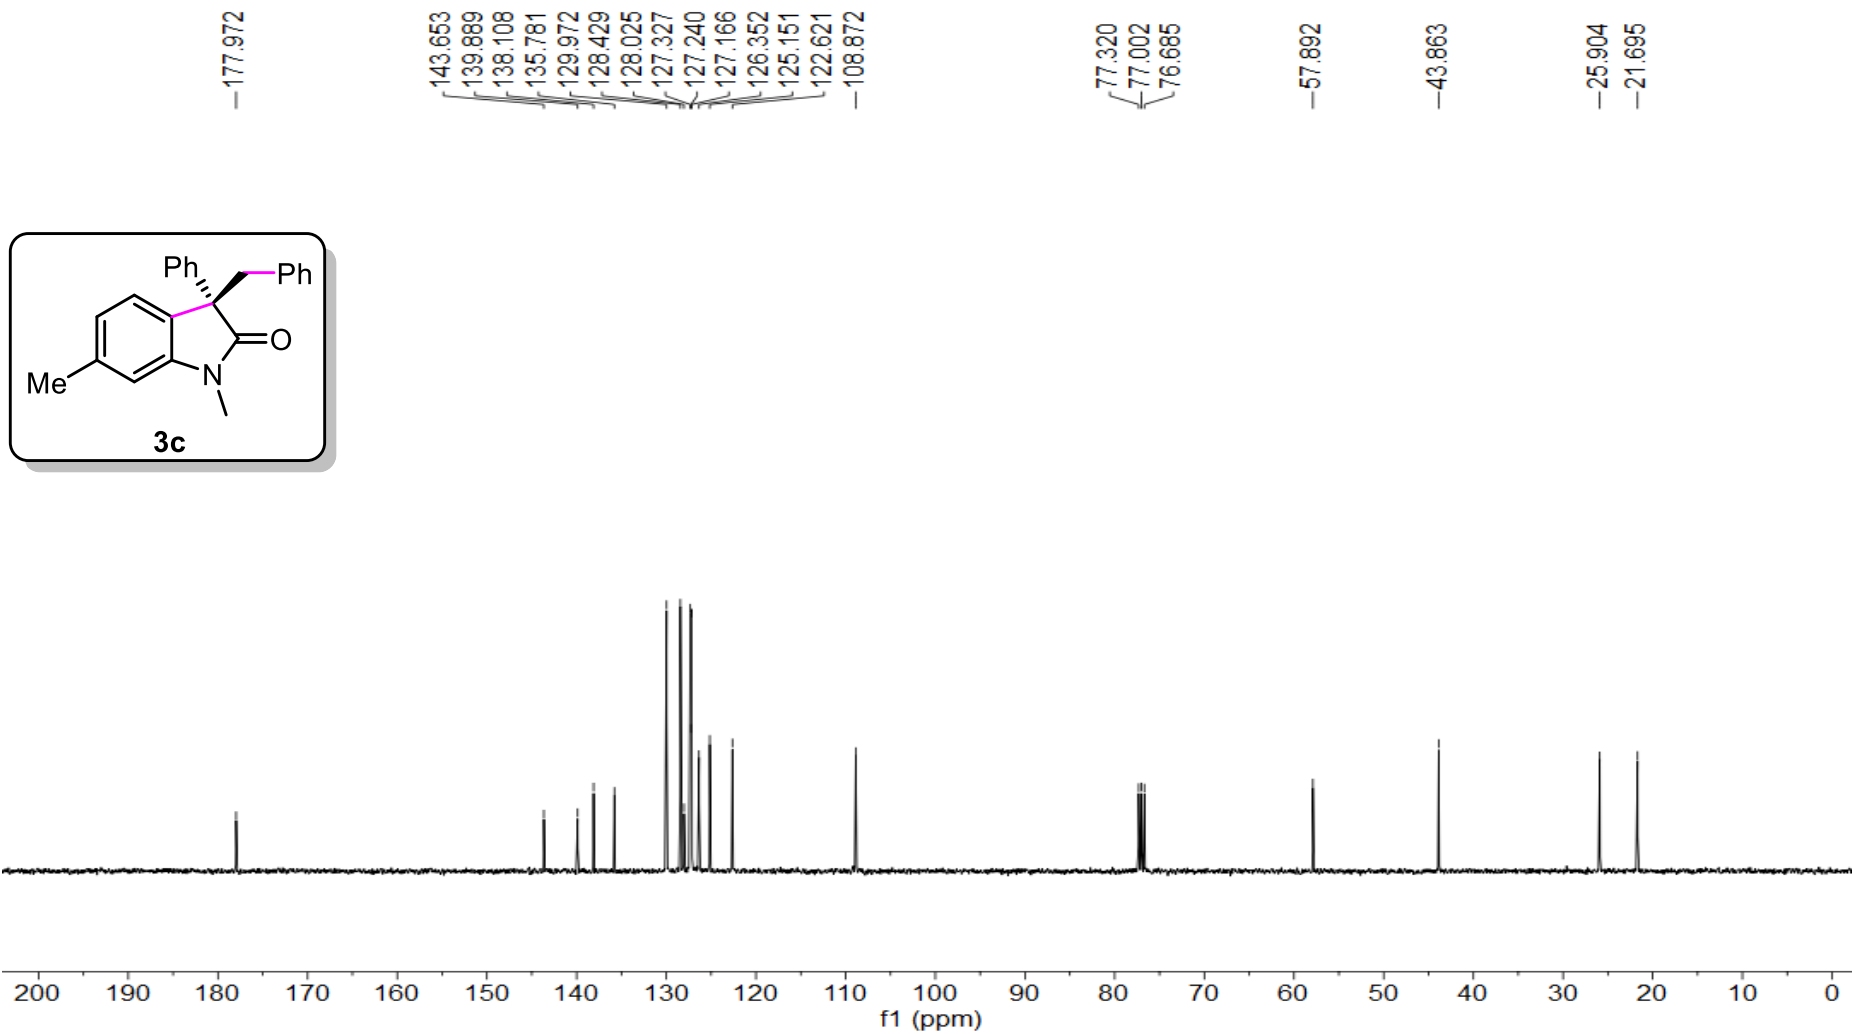

$^1\text{H}$  NMR (400 MHz,  $\text{CDCl}_3$ ) of compound **3d**

7.504  
7.500  
7.484  
7.331  
7.327  
7.310  
7.278  
7.262  
7.039  
7.032  
7.028  
7.014  
7.009  
6.931  
6.843  
6.825  
6.817

3.654  
3.649  
3.620  
3.463  
3.432  
2.913  
2.908  
2.245  
2.239  
2.234

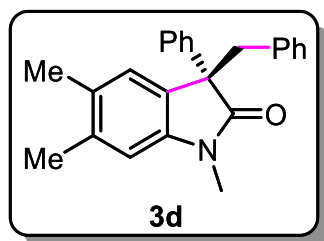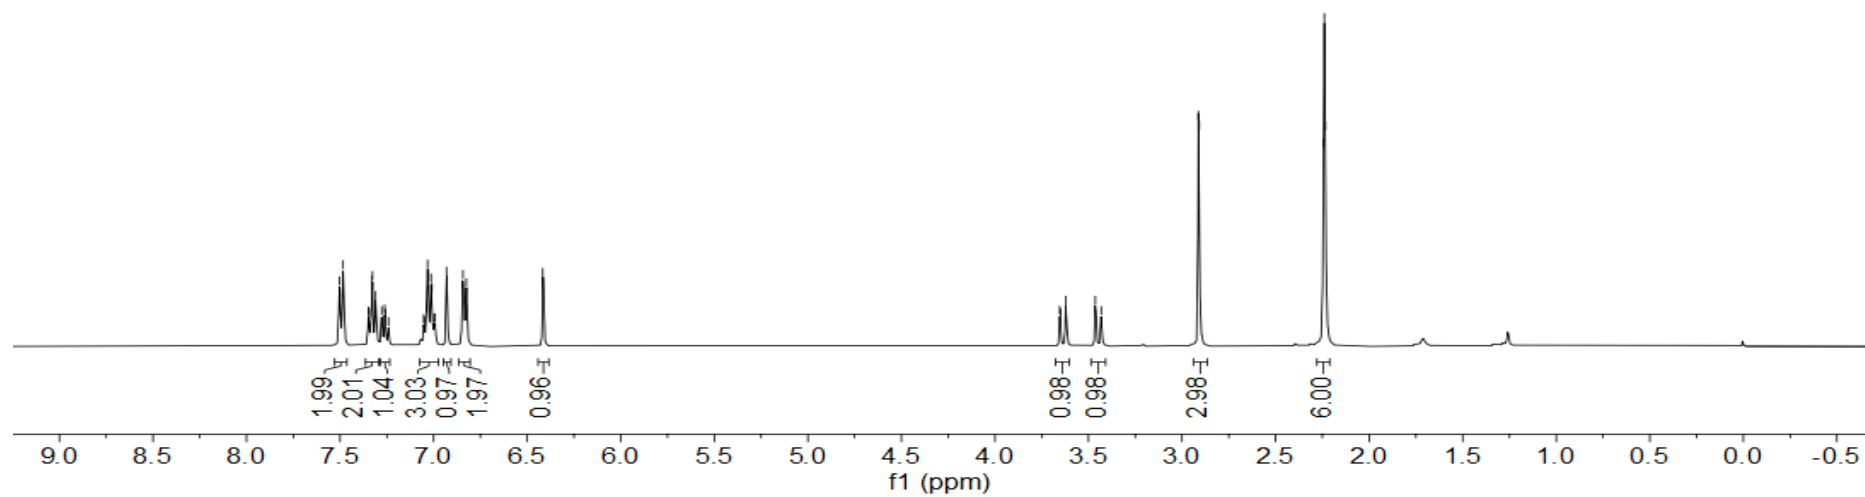

$^{13}\text{C}$  NMR (101 MHz,  $\text{CDCl}_3$ ) of compound **3d**

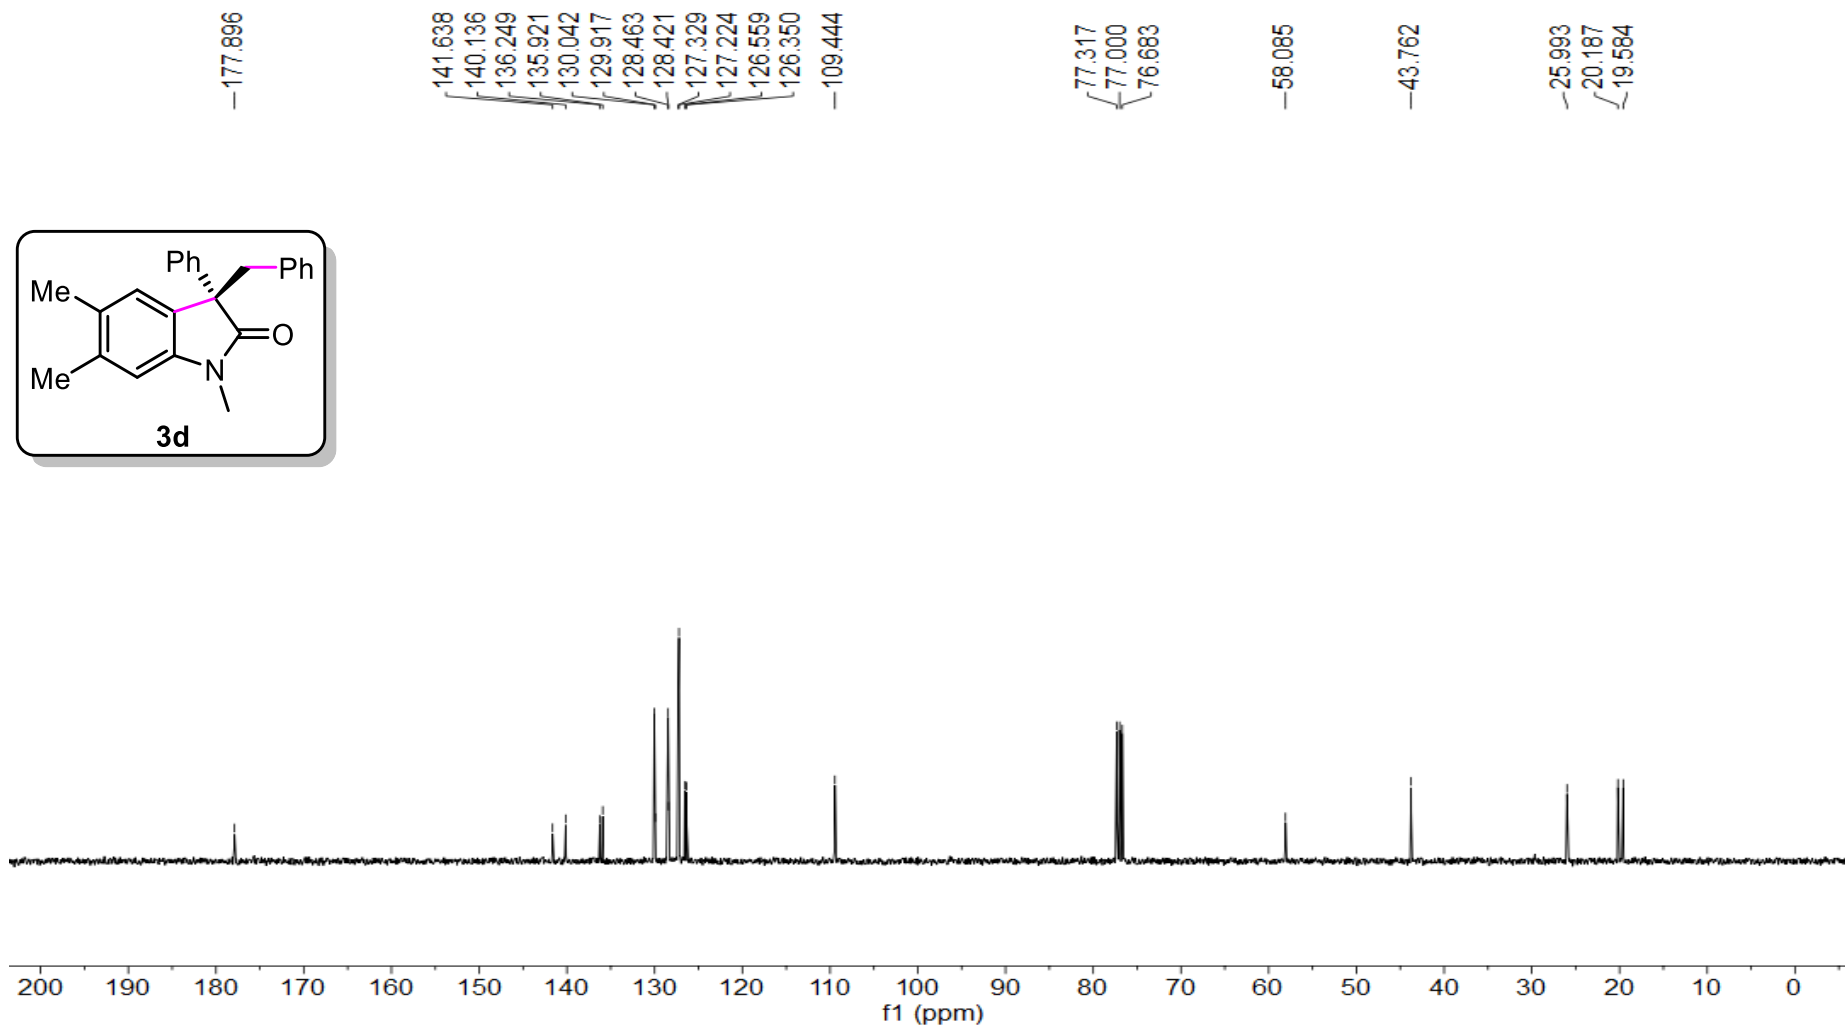



$^1\text{H}$  NMR (400 MHz,  $\text{CDCl}_3$ ) of compound **3e**

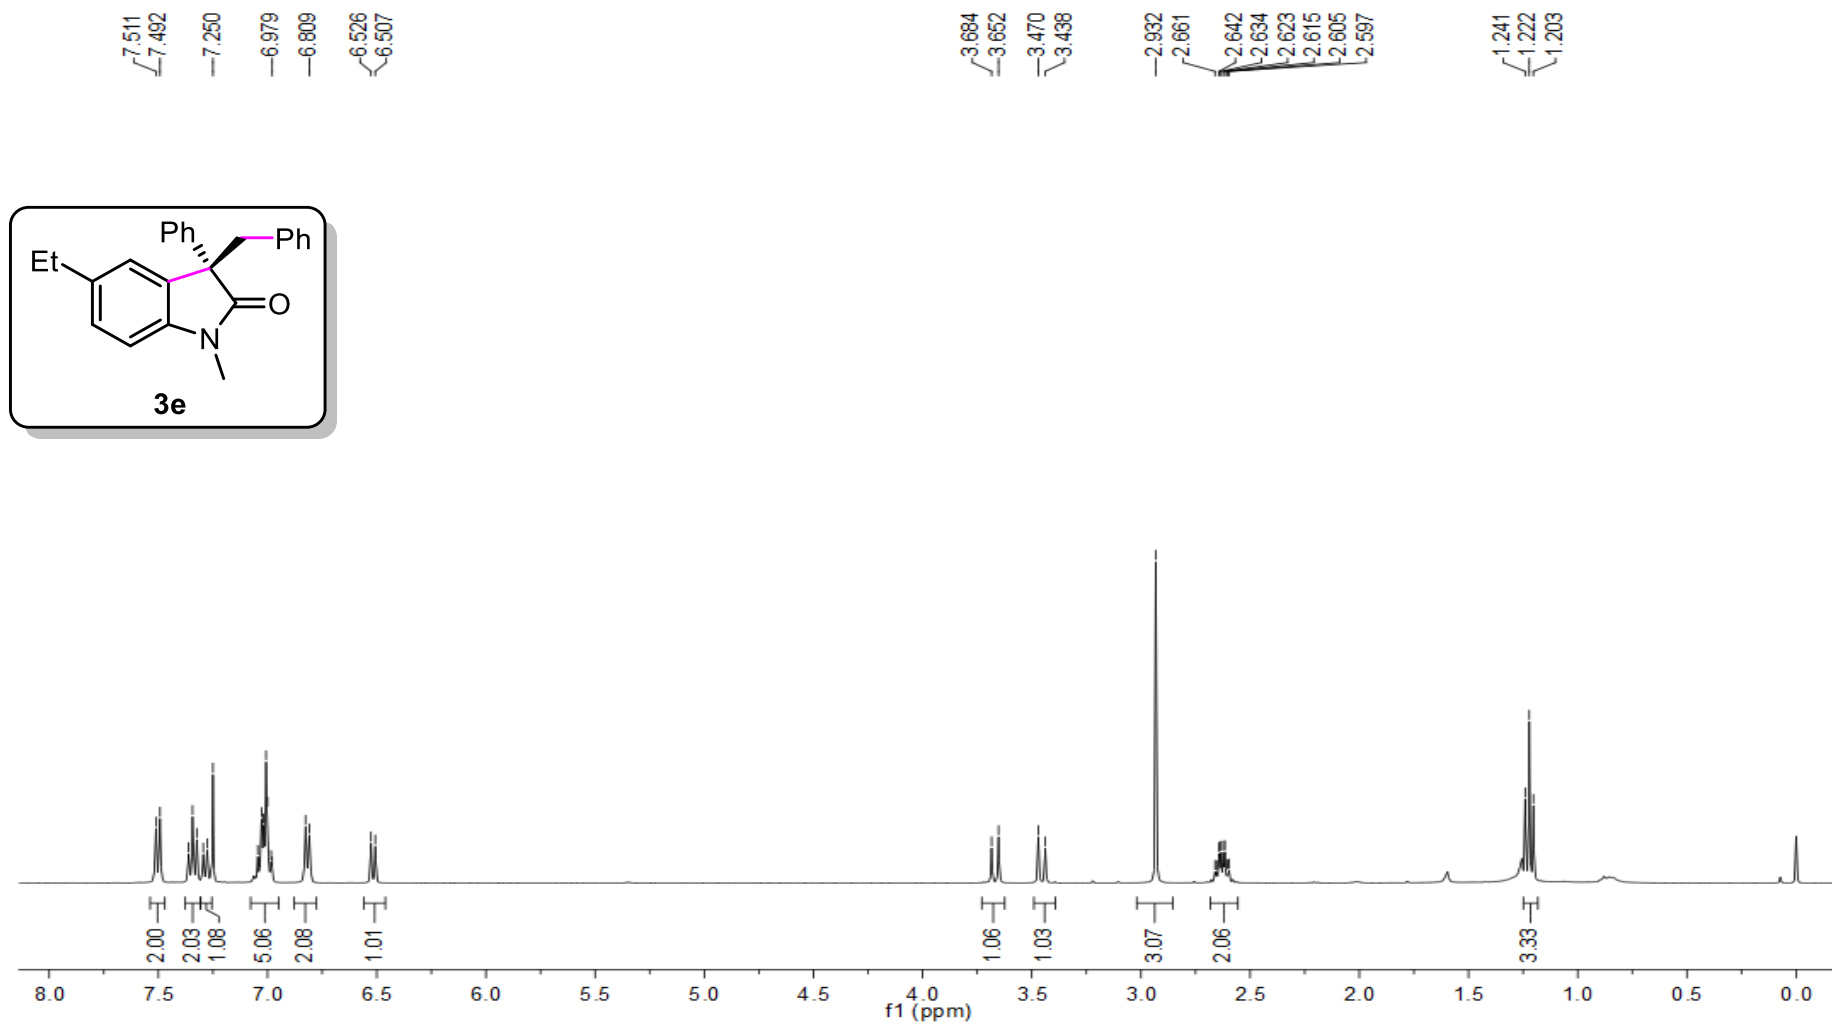

$^{13}\text{C}$  NMR (101 MHz,  $\text{CDCl}_3$ ) of compound **3e**

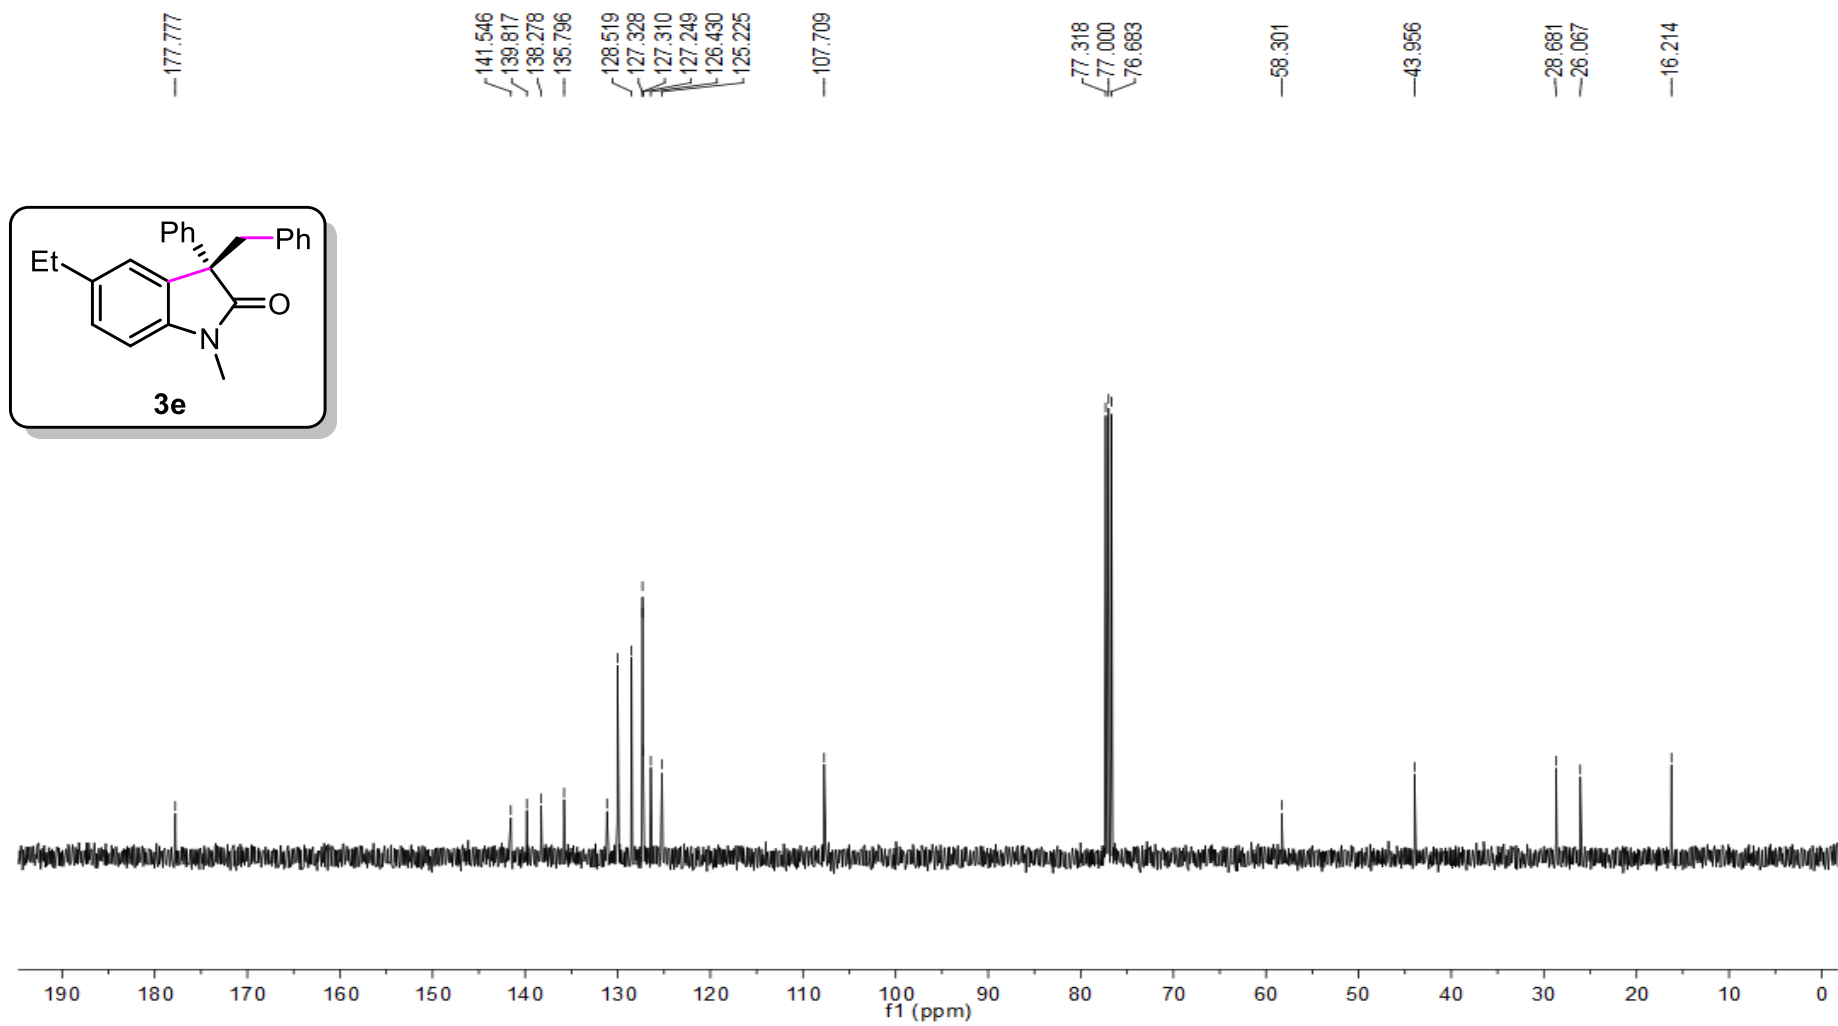

$^1\text{H}$  NMR (400 MHz,  $\text{CDCl}_3$ ) of compound **3f**

7.503  
7.368  
7.351  
7.331  
7.303  
7.285  
7.256  
— 6.979  
— 6.802  
6.538  
6.518

3.681  
3.649  
— 3.444  
2.948  
2.927  
2.909  
2.892  
2.875  
2.858

1.258  
1.242  
1.225

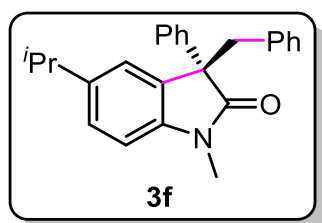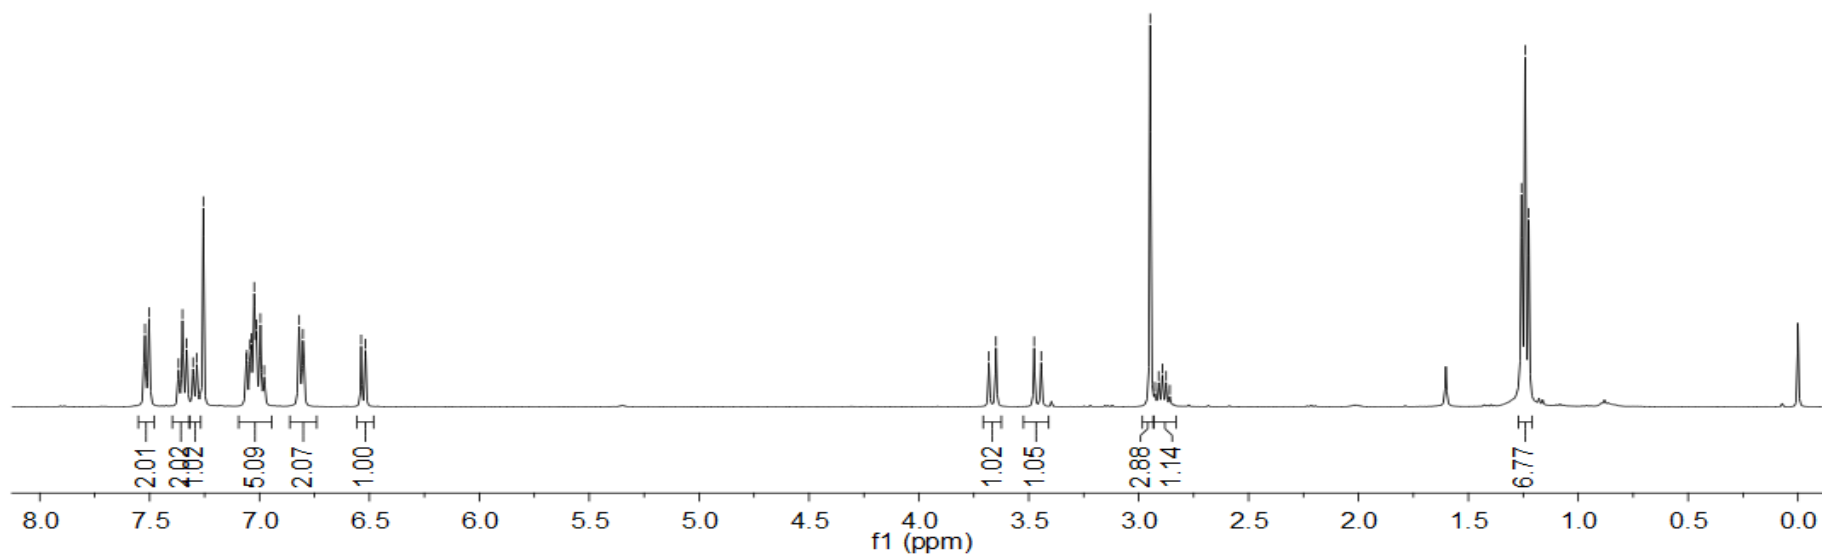

$^{13}\text{C}$  NMR (101 MHz,  $\text{CDCl}_3$ ) of compound **3f**

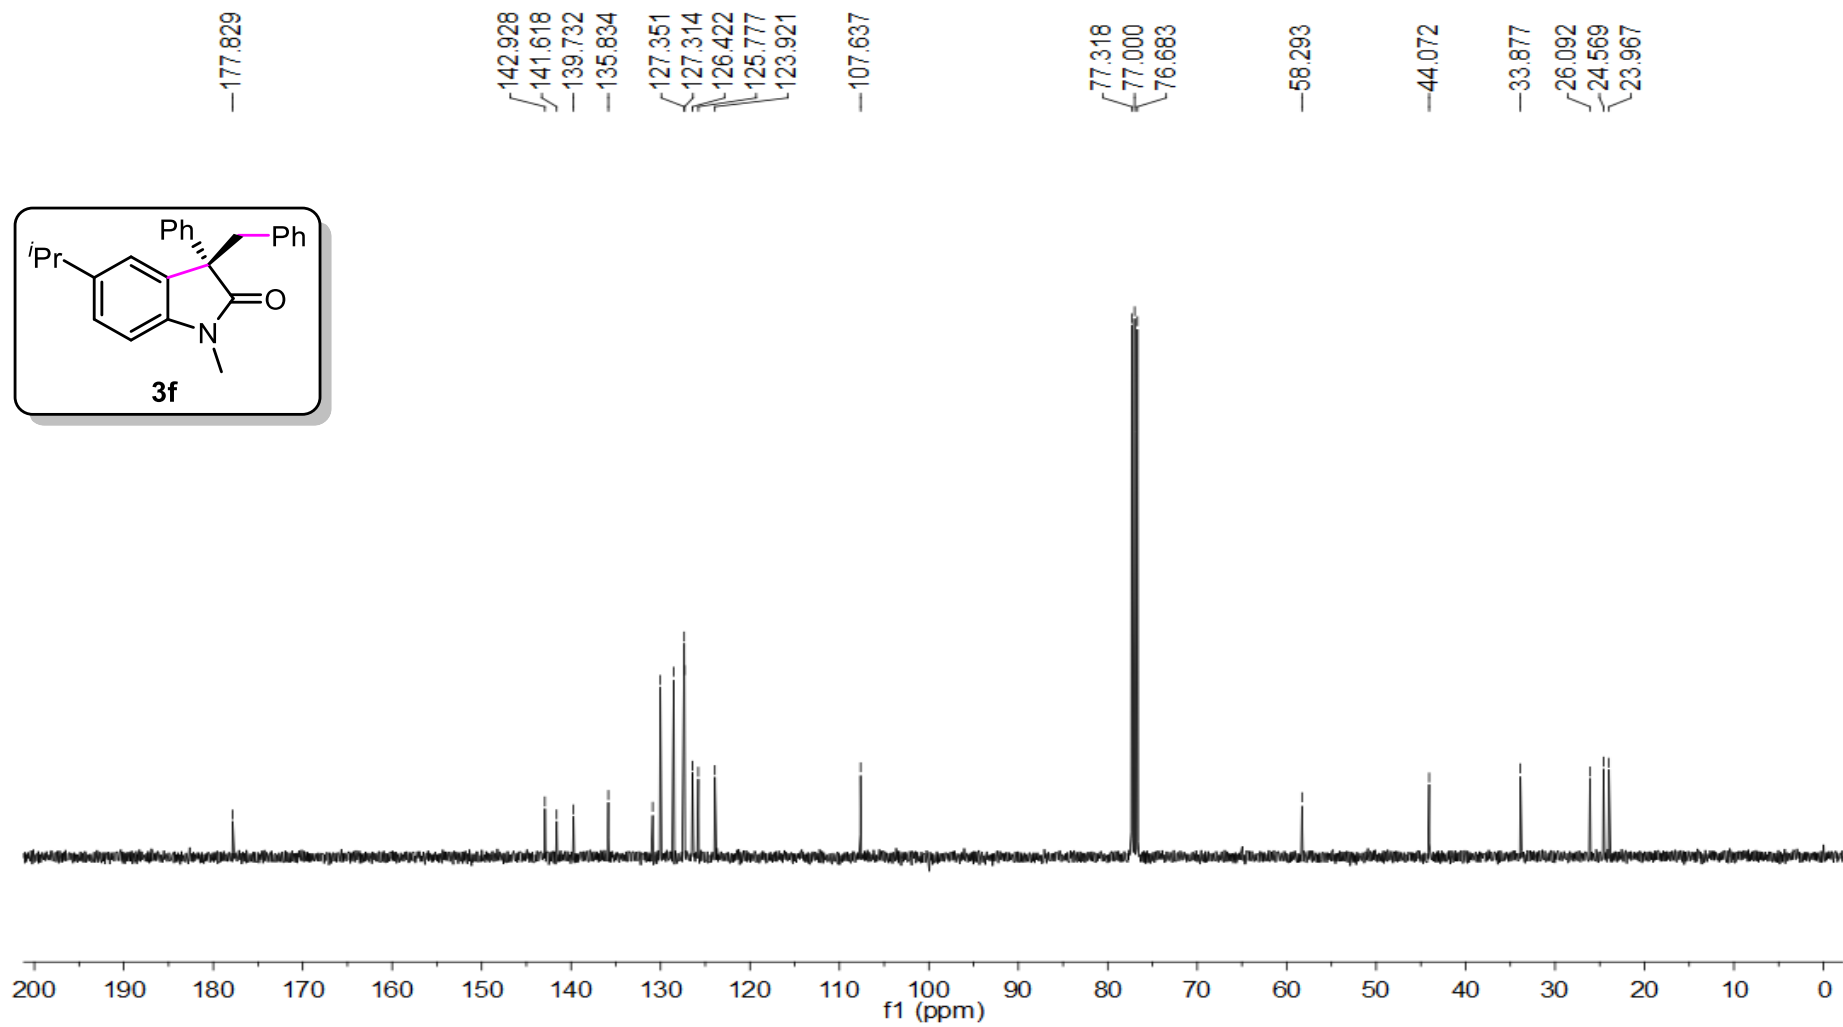

$^1\text{H}$  NMR (400 MHz,  $\text{CDCl}_3$ ) of compound **3g**

7.490  
7.362  
7.345  
7.326  
7.297  
7.279  
7.257  
7.001  
6.819  
6.521  
6.500

3.708  
3.676  
3.455  
3.423  
2.937  
2.626  
2.607  
2.588  
2.569  
1.599  
1.589  
1.573  
1.564  
1.311  
0.968  
0.950  
0.932

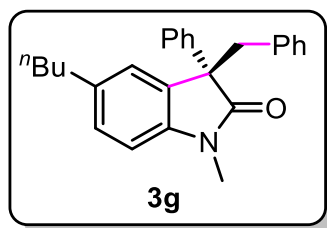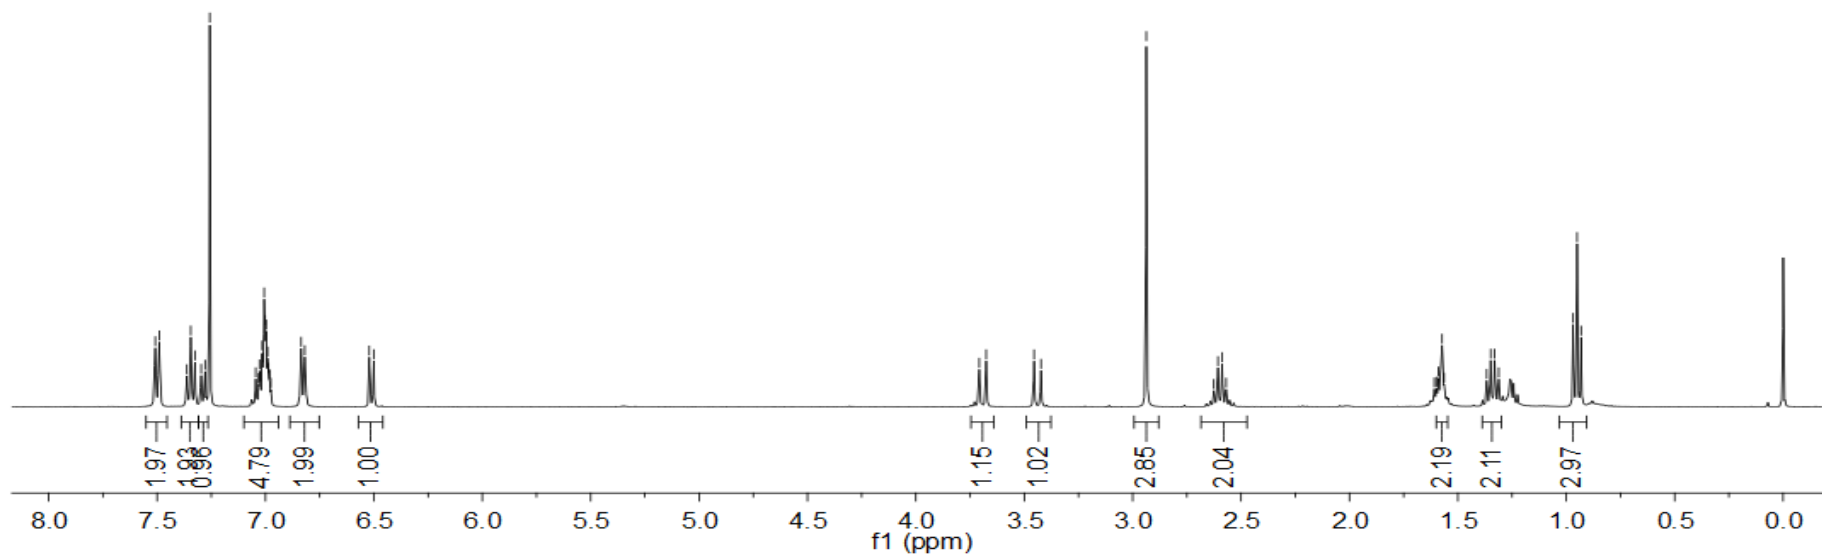

$^{13}\text{C}$  NMR (101 MHz,  $\text{CDCl}_3$ ) of compound **3g**

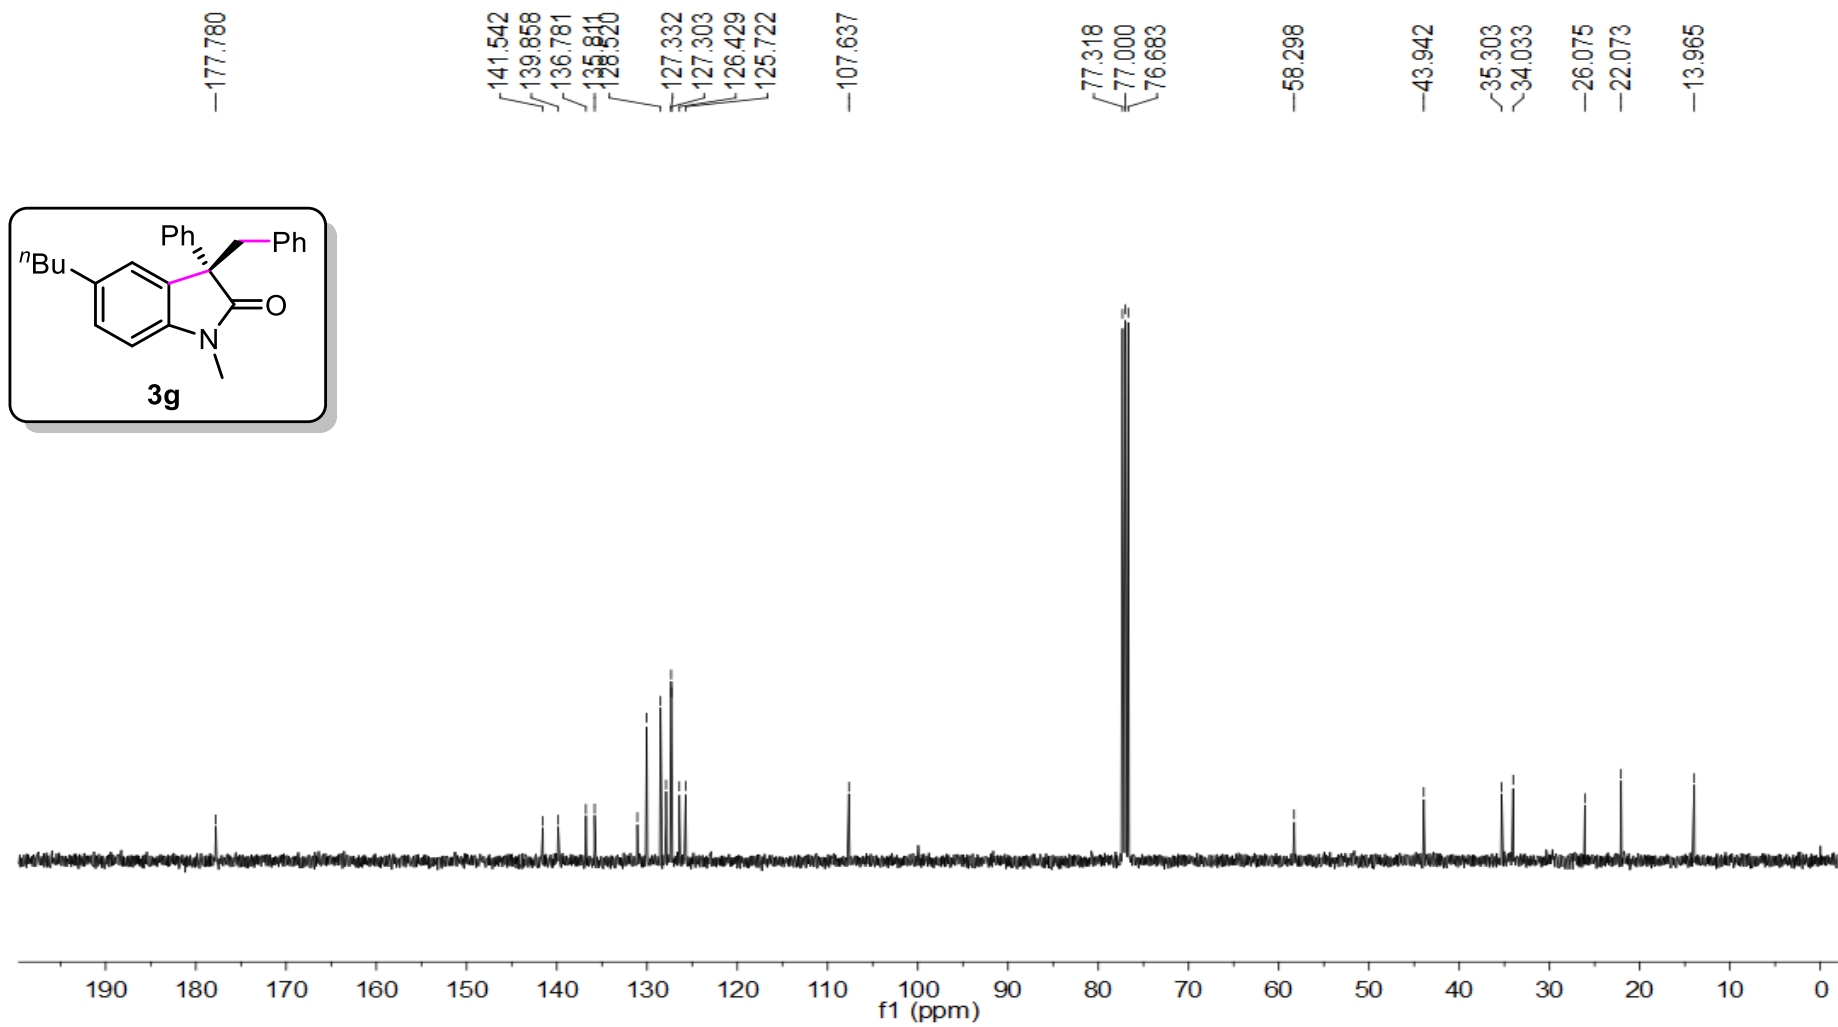

$^1\text{H}$  NMR (400 MHz,  $\text{CDCl}_3$ ) of compound **3h**

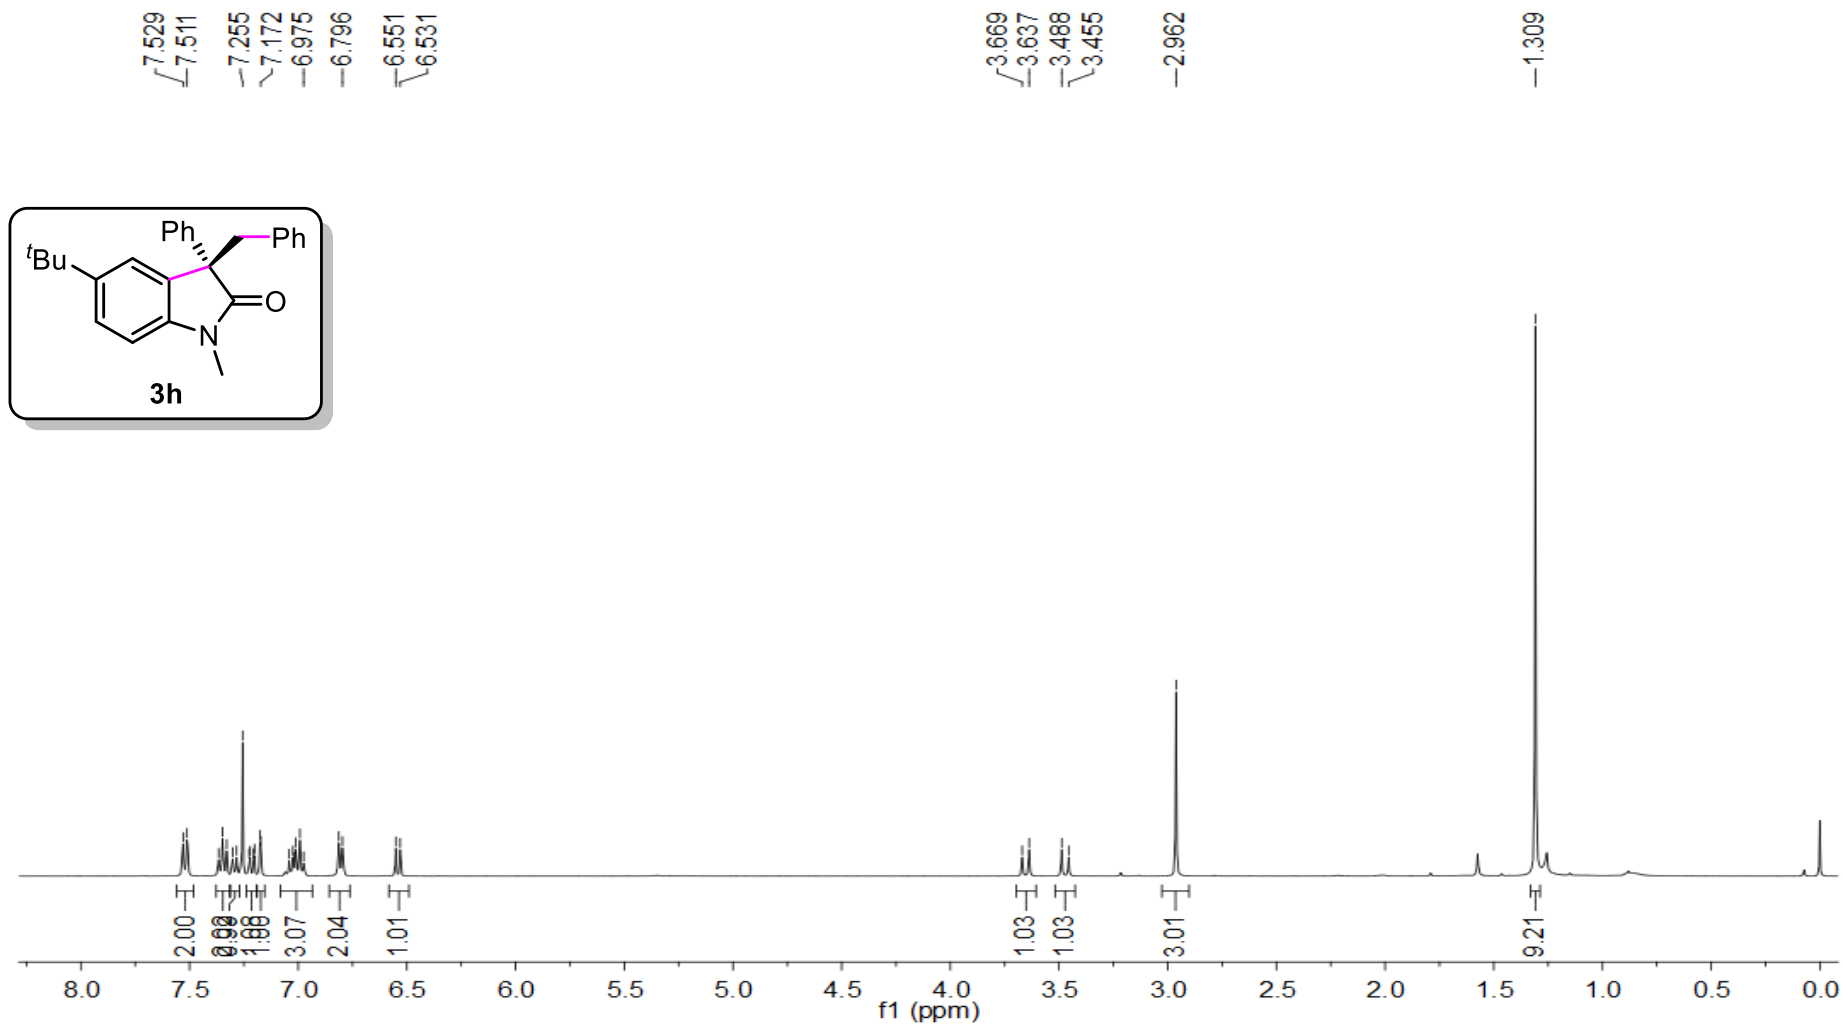

$^{13}\text{C}$  NMR (101 MHz,  $\text{CDCl}_3$ ) of compound **3h**

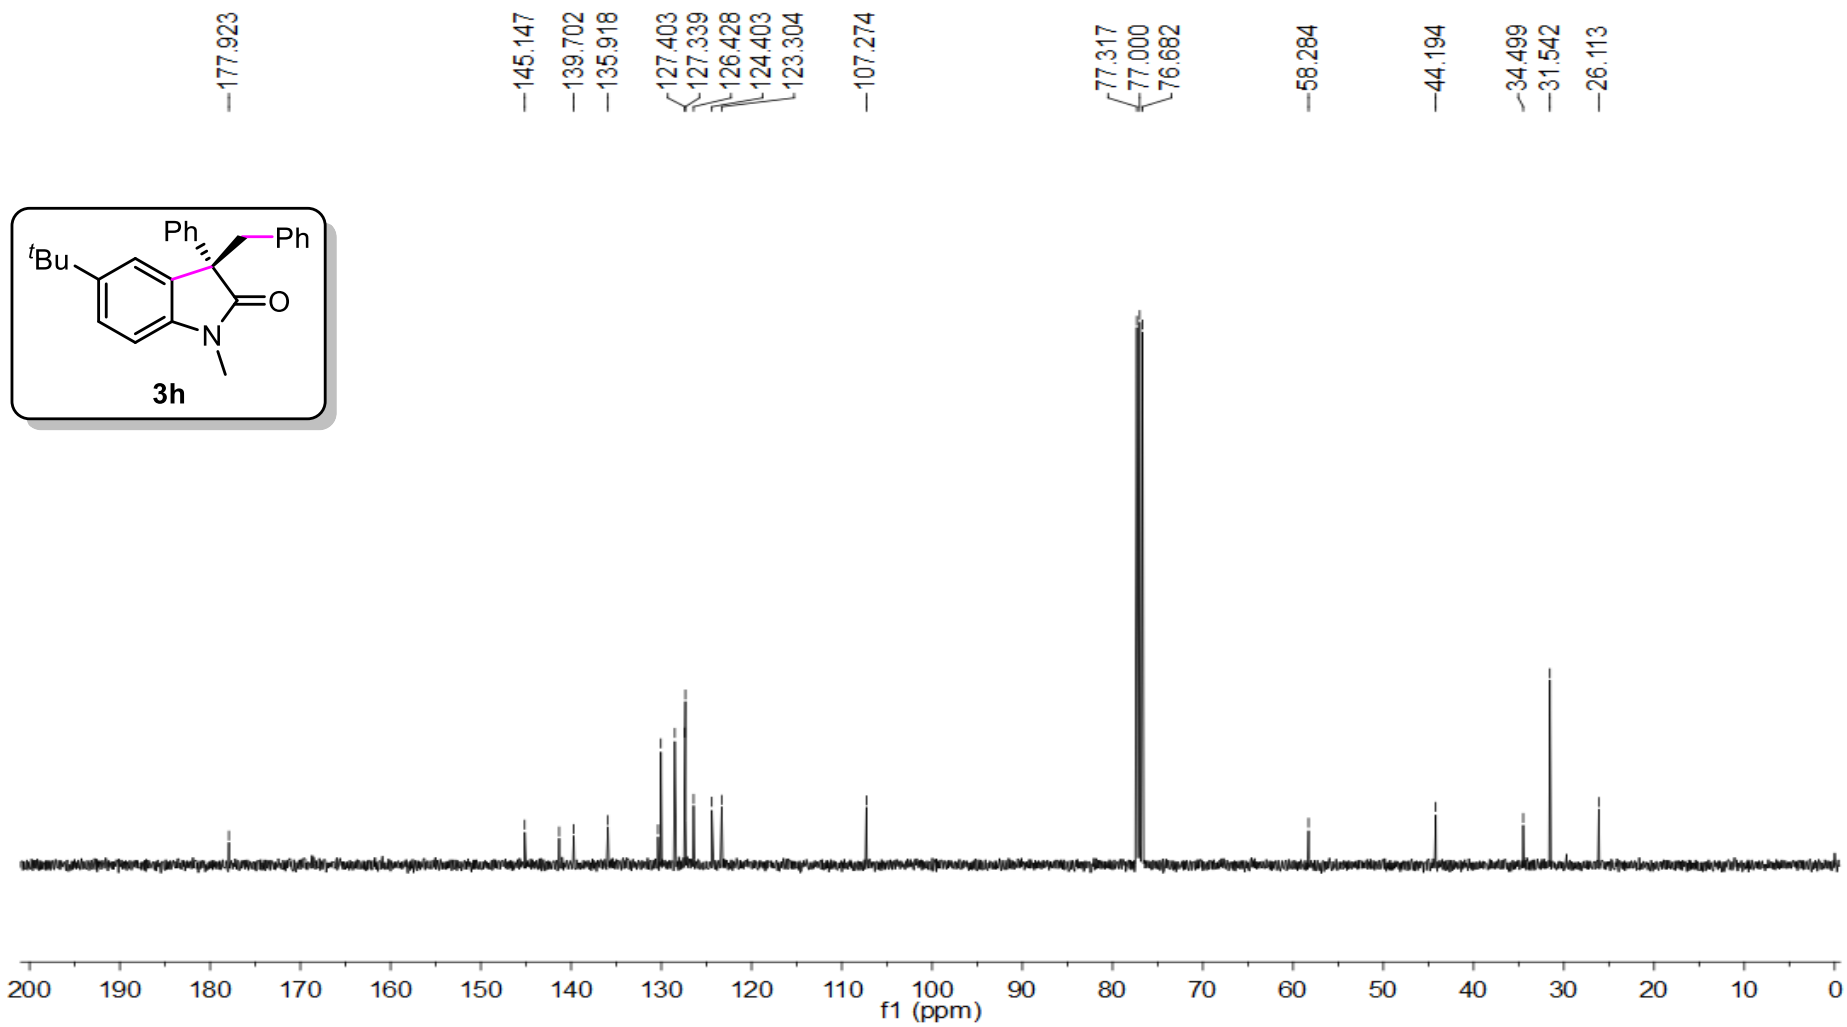



$^1\text{H}$  NMR (400 MHz,  $\text{CDCl}_3$ ) of compound **3i**

7.498  
7.480  
7.359  
7.355  
7.342  
7.338  
7.322  
7.297  
7.294  
7.291  
7.282  
7.276  
7.270  
7.261  
7.258  
7.255  
7.247  
7.059  
7.056  
7.046  
7.042  
7.037  
7.032  
7.023  
7.013  
7.009  
7.001  
6.870  
6.867  
6.852  
6.847  
6.798  
6.792  
6.752  
6.746  
6.731  
6.725  
6.523  
6.502  
3.766  
3.702  
3.671  
3.461  
3.429  
2.920

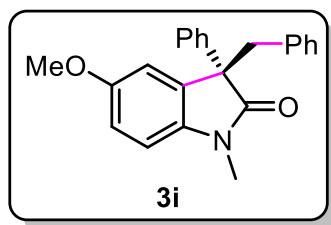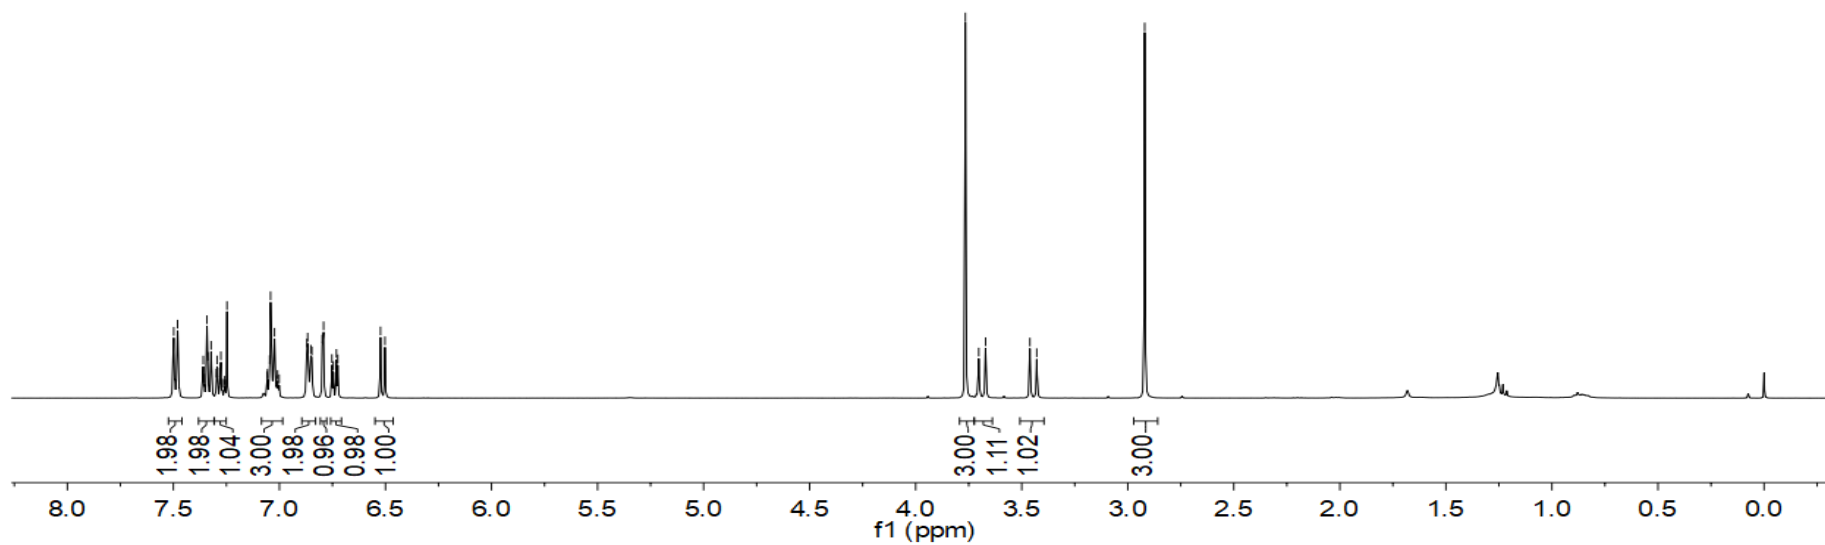

$^{13}\text{C}$  NMR (101 MHz,  $\text{CDCl}_3$ ) of compound **3i**

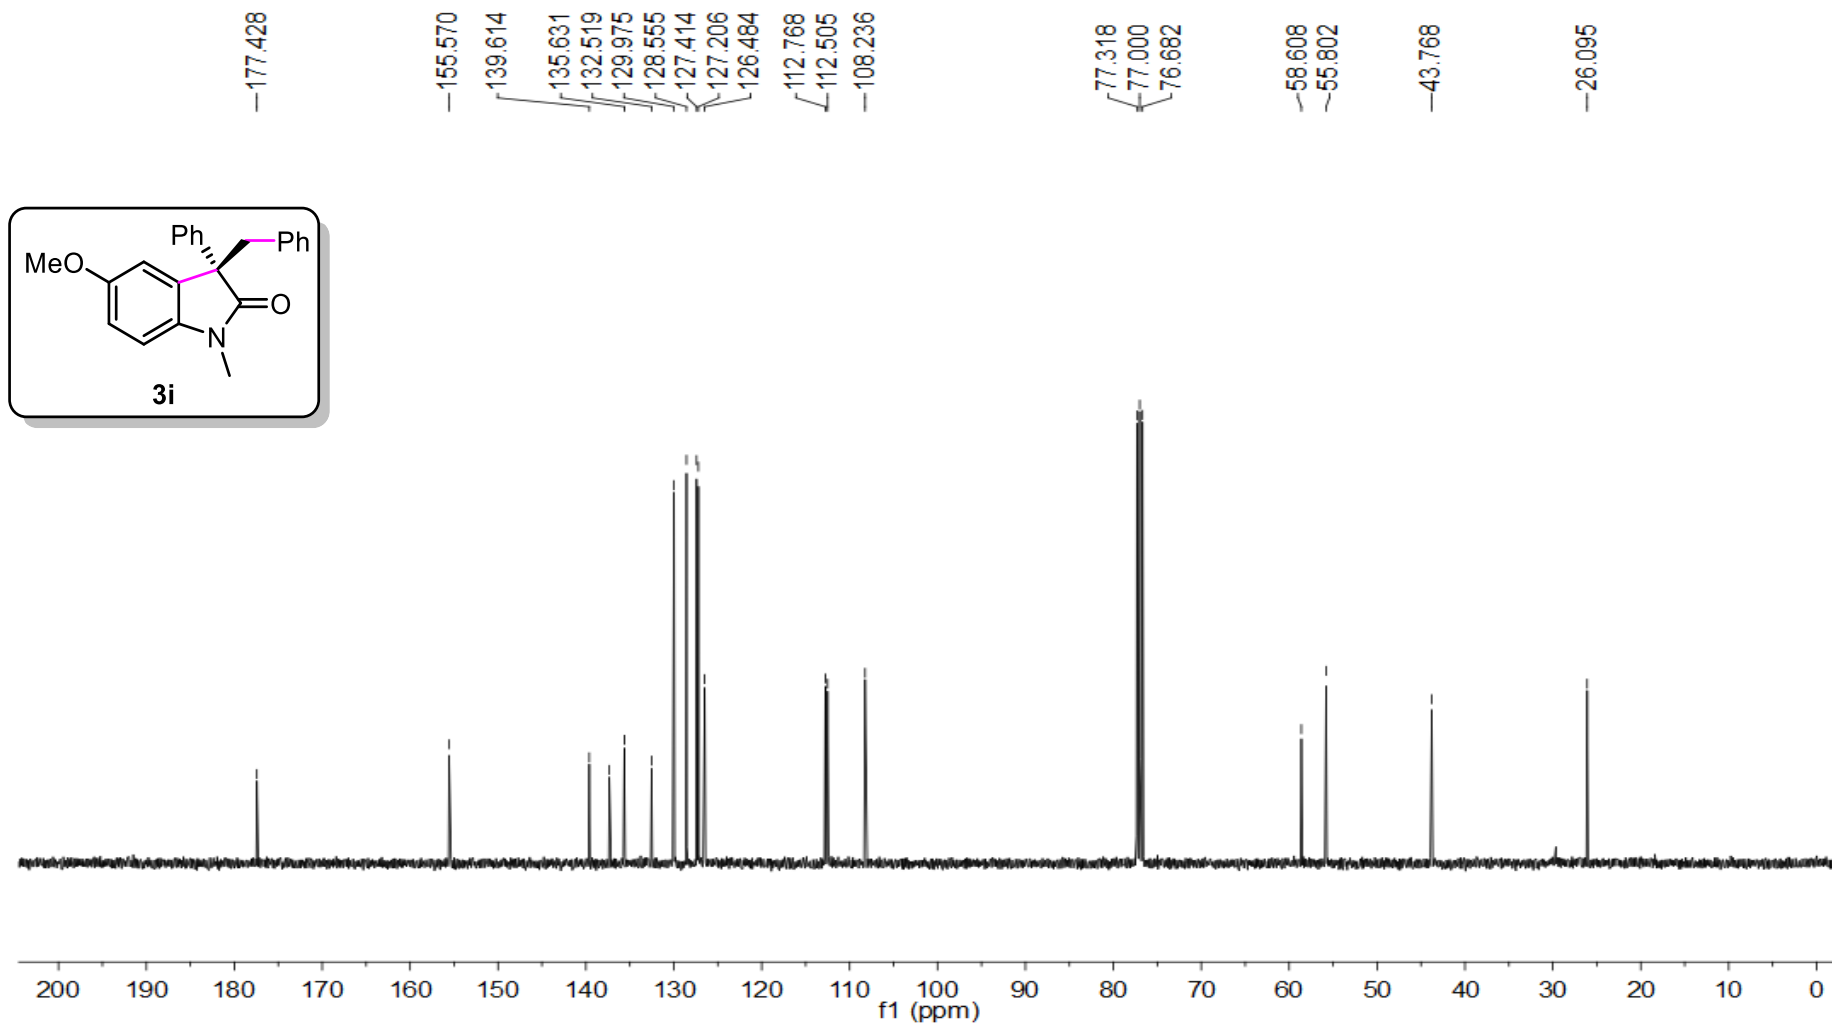

$^1\text{H}$  NMR (400 MHz,  $\text{CDCl}_3$ ) of compound **3j**

7.492  
7.351  
7.333  
7.314  
7.285  
7.267  
7.252  
-7.003  
-6.831  
-6.564  
-6.206  
-6.200

3.796  
3.670  
3.638  
3.442  
3.410  
-2.922

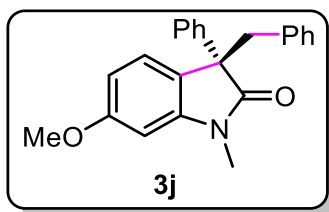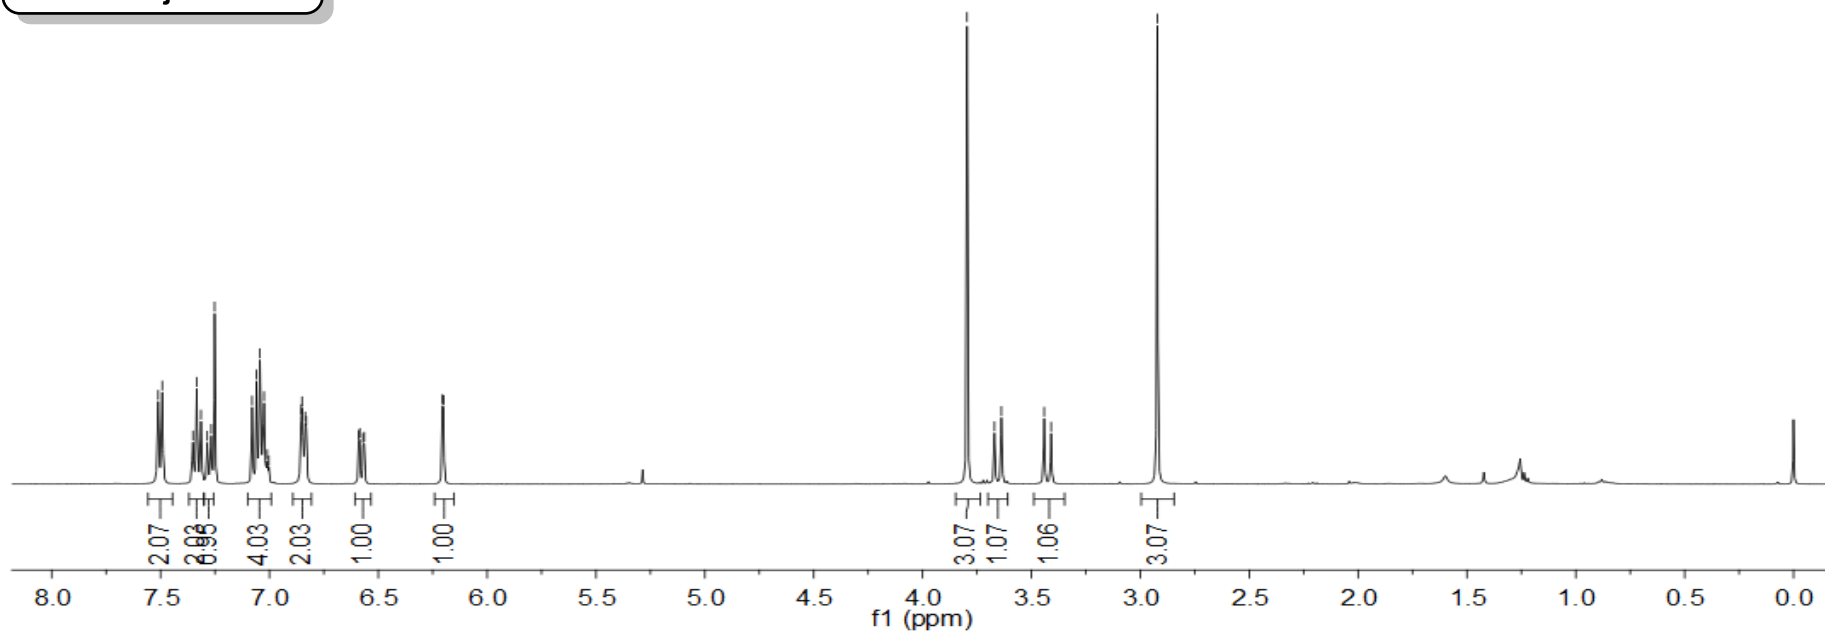

$^{13}\text{C}$  NMR (101 MHz,  $\text{CDCl}_3$ ) of compound **3j**

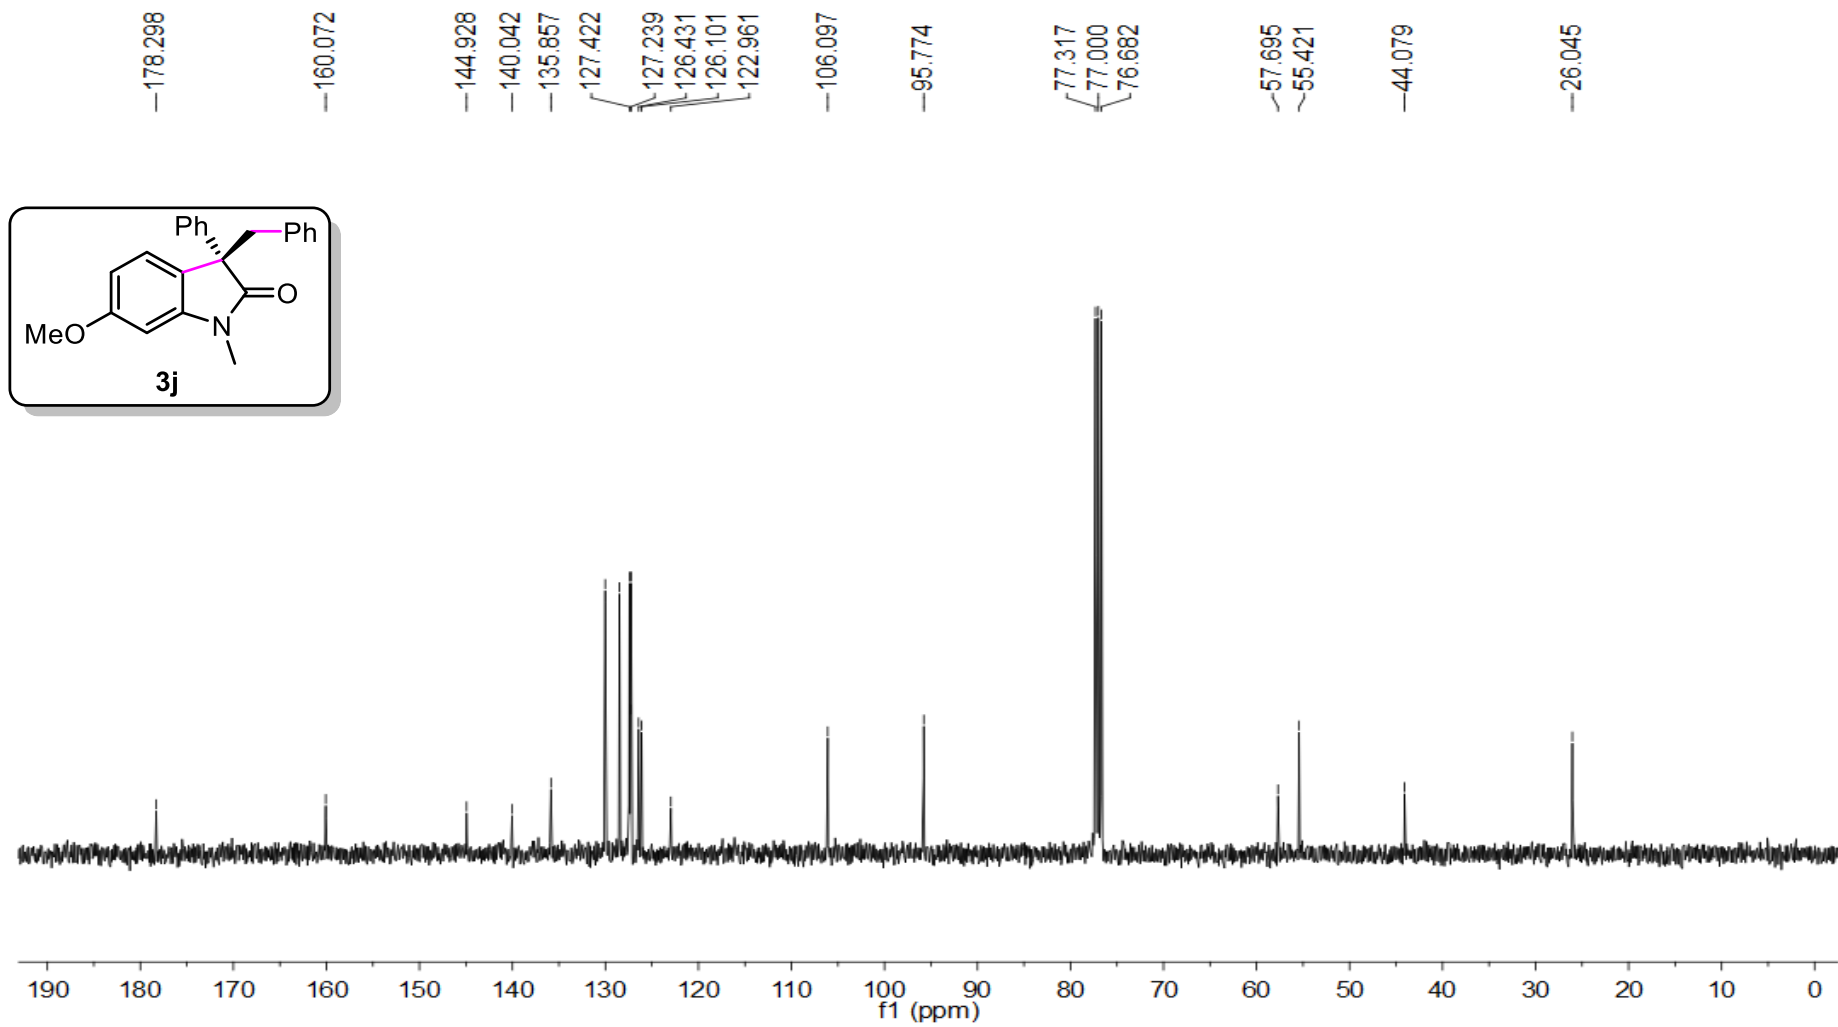

$^1\text{H}$  NMR (400 MHz,  $\text{CDCl}_3$ ) of compound **3k**

7.497  
7.494  
7.475  
7.367  
7.349  
7.330  
7.303  
7.286  
7.259  
7.071  
7.051  
7.033  
7.018  
6.852  
6.849  
6.833  
6.829  
6.698  
6.273

3.874  
3.817  
3.637  
3.605  
3.484  
3.452  
-2.958

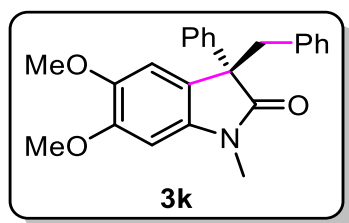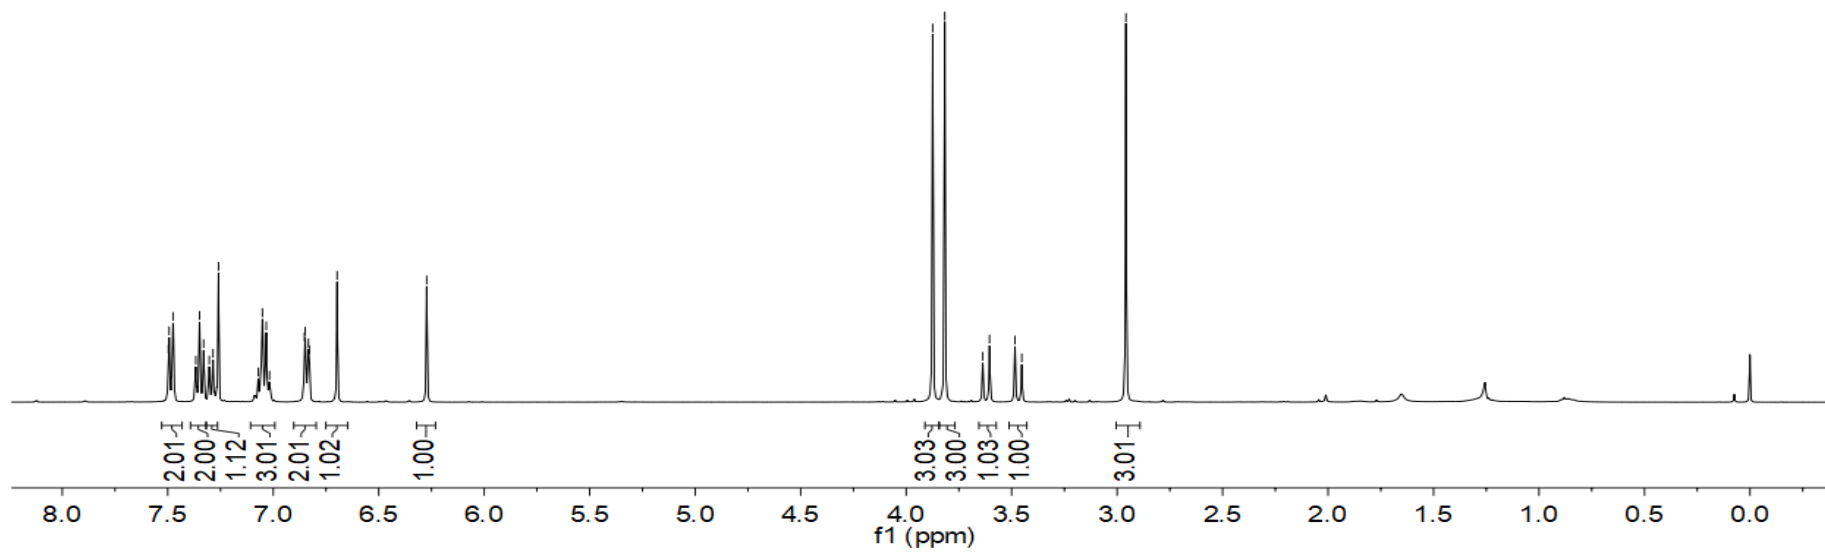

$^{13}\text{C}$  NMR (101 MHz,  $\text{CDCl}_3$ ) of compound **3k**

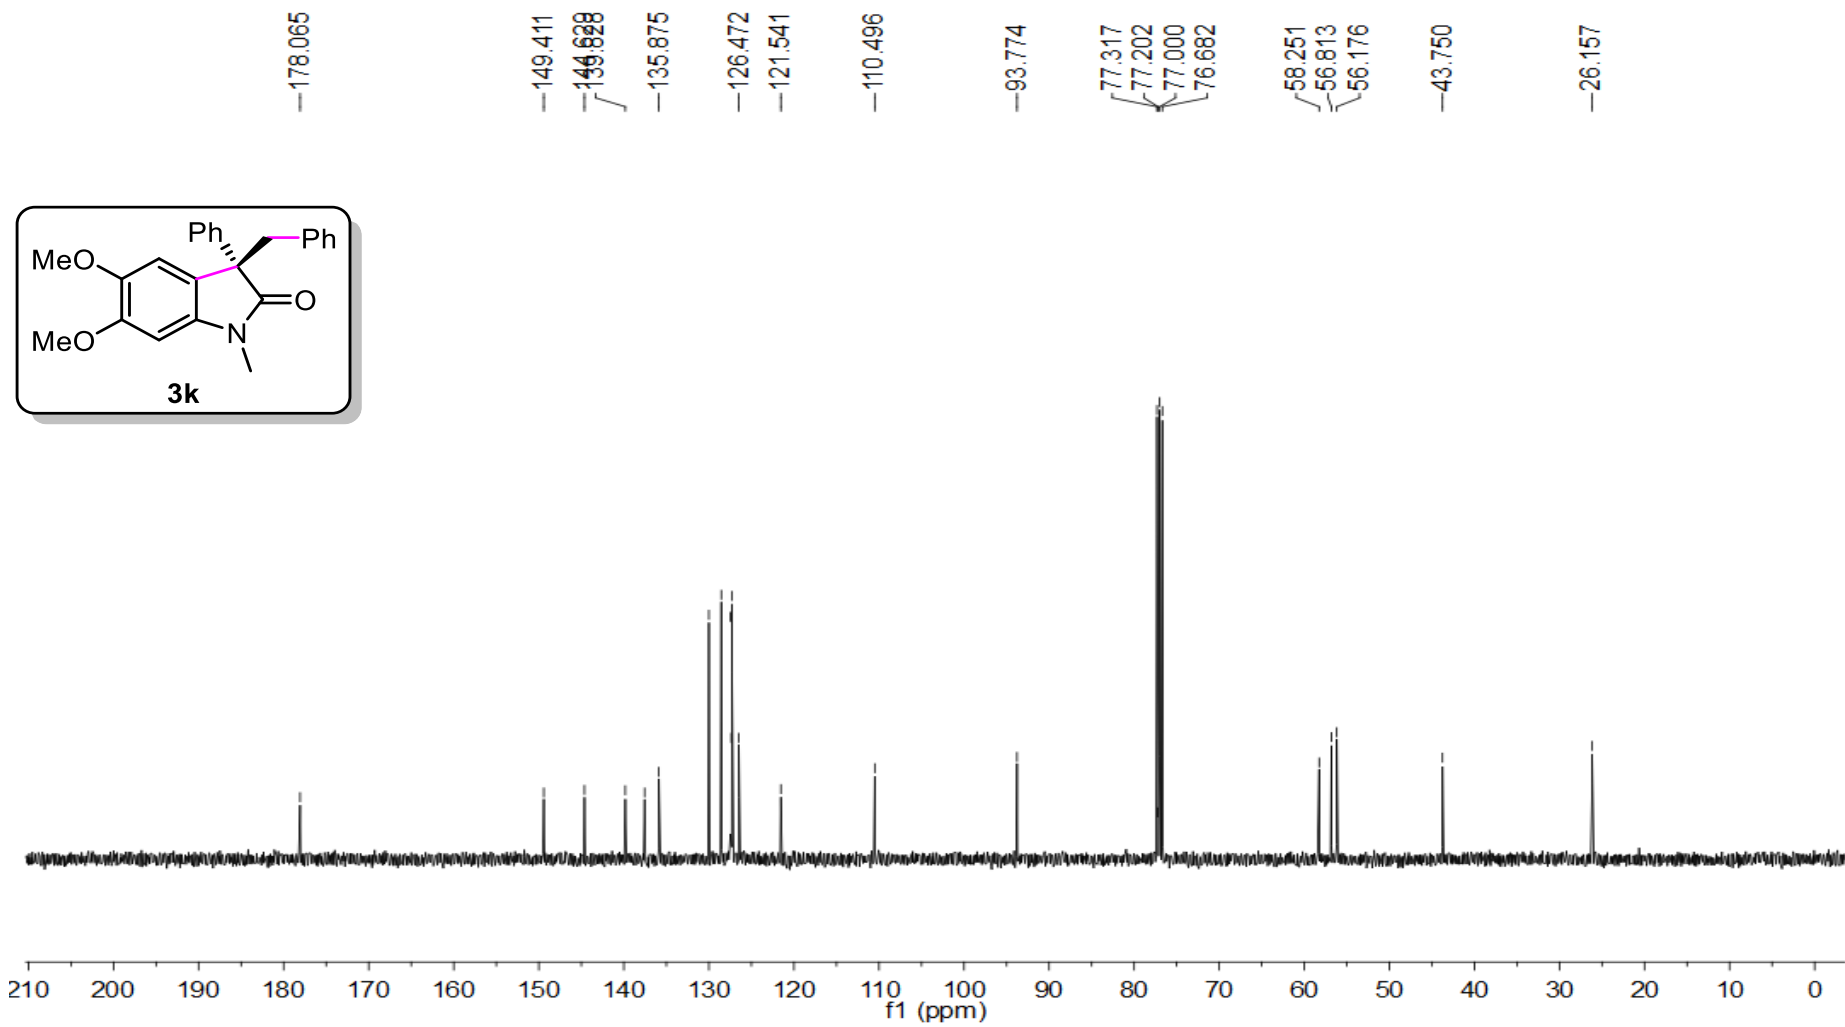

$^1\text{H}$  NMR (400 MHz,  $\text{CDCl}_3$ ) of compound **31**

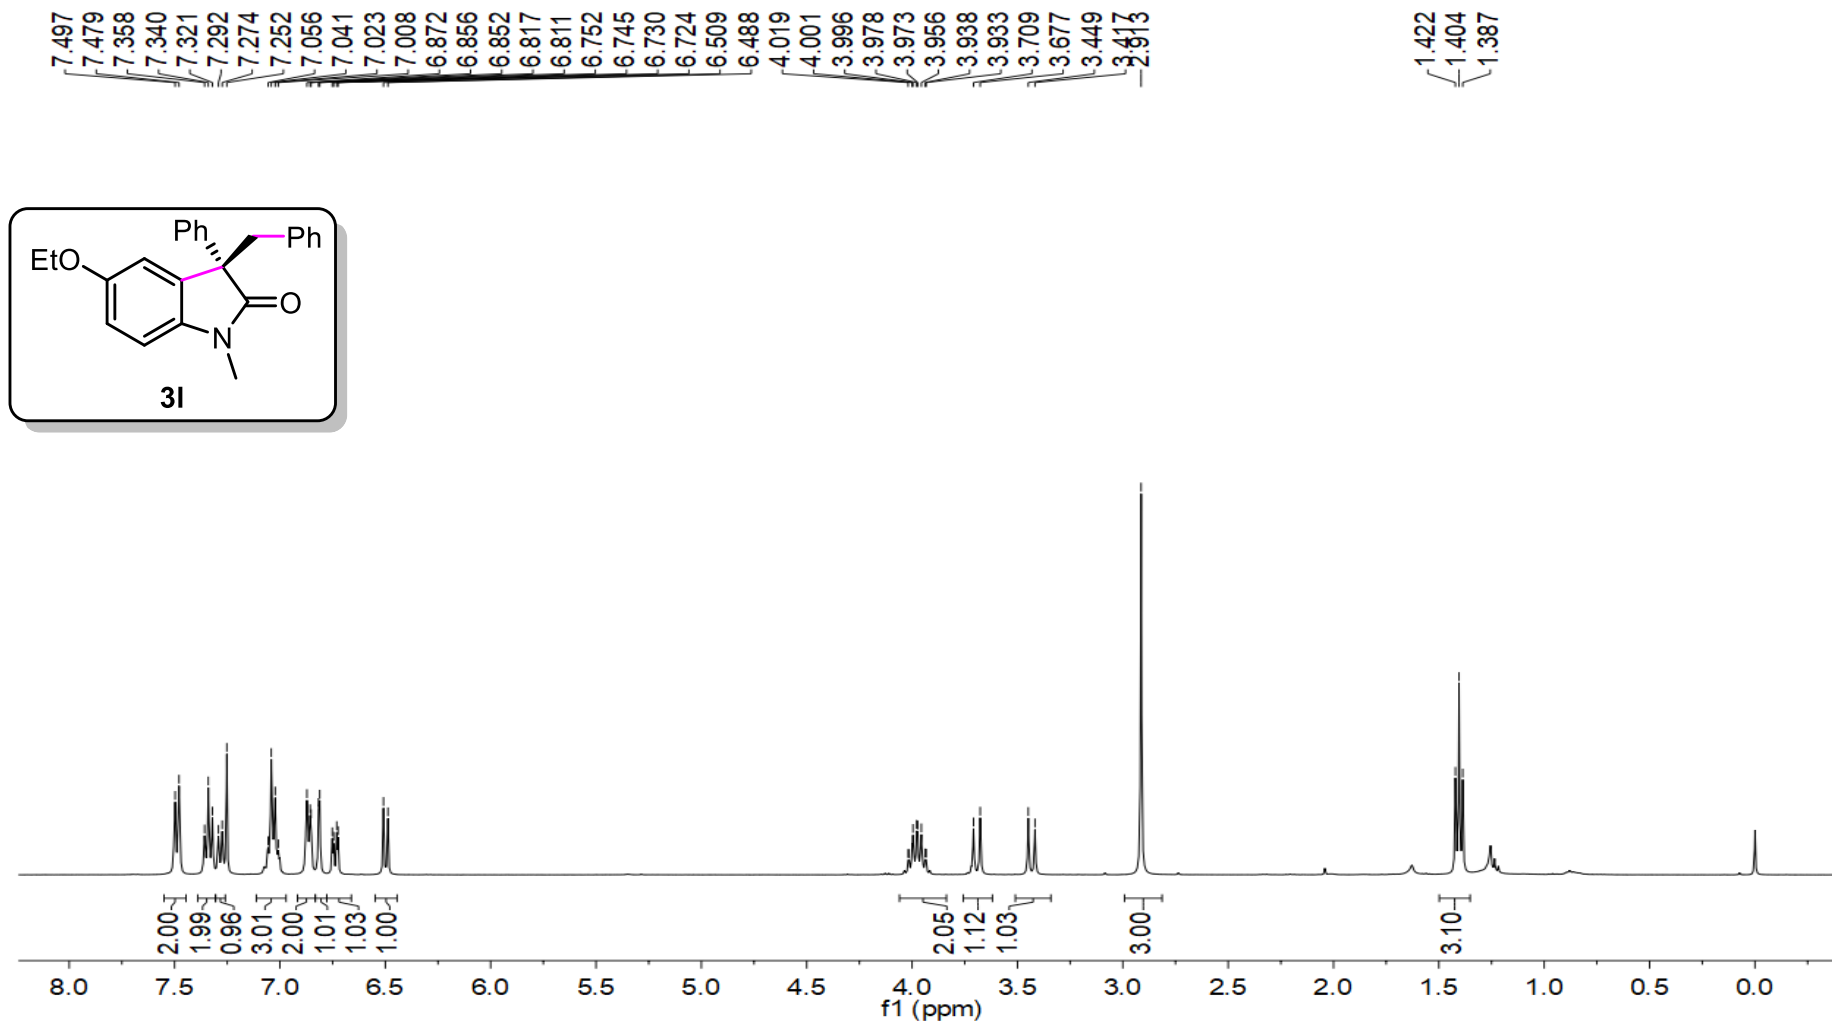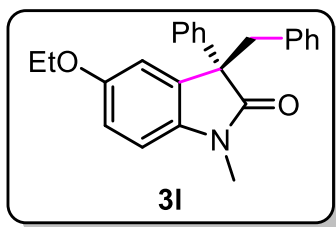

$^{13}\text{C}$  NMR (101 MHz,  $\text{CDCl}_3$ ) of compound **3l**

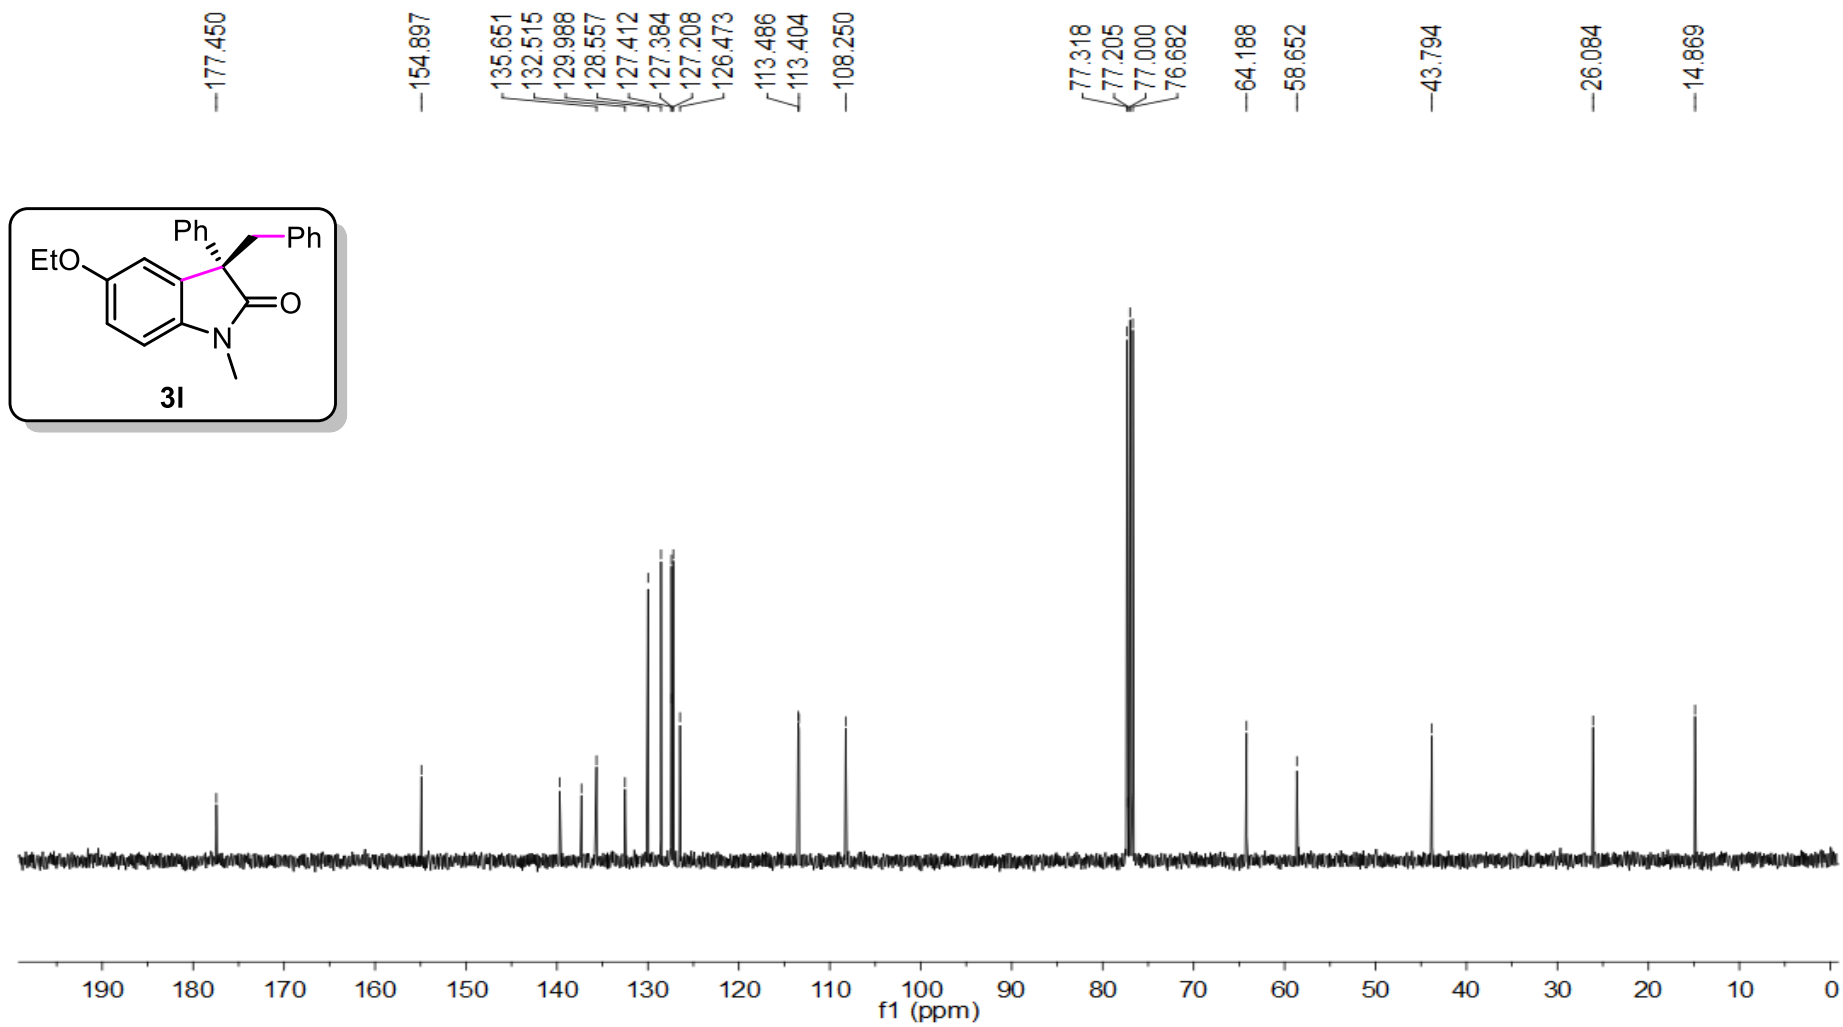



$^1\text{H}$  NMR (400 MHz,  $\text{CDCl}_3$ ) of compound **3m**

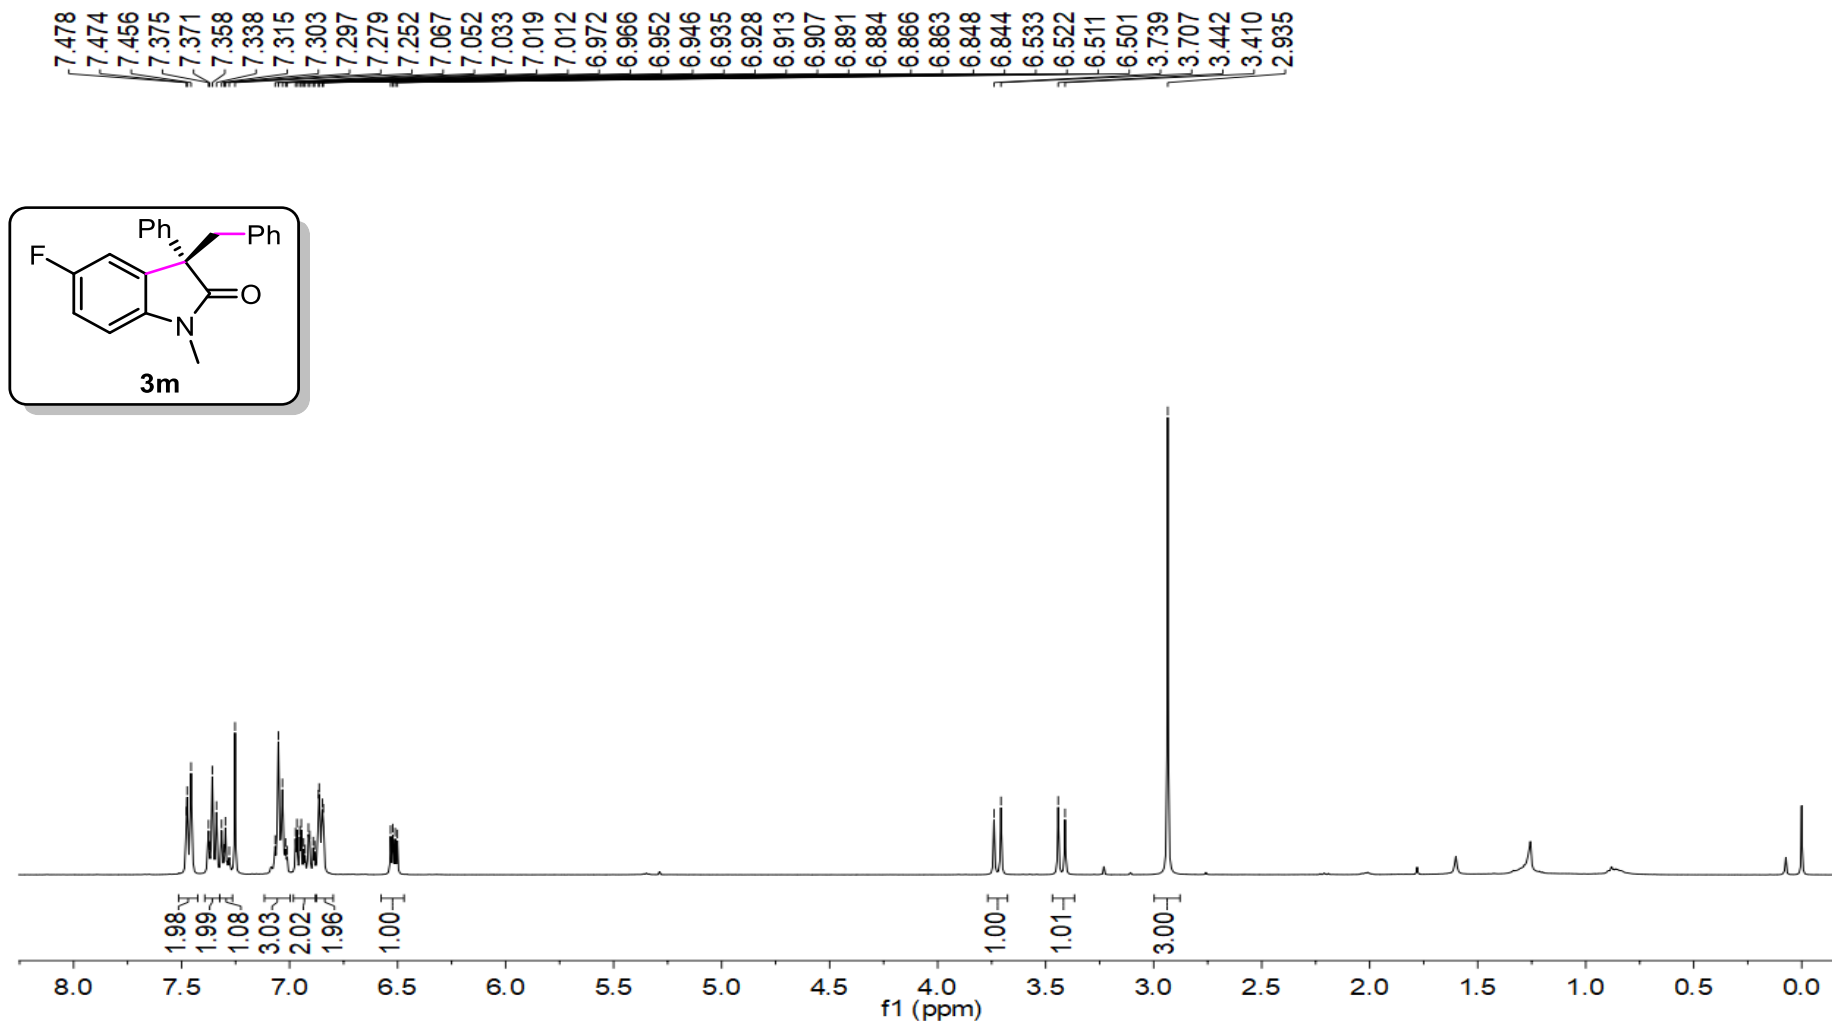

$^{13}\text{C}$  NMR (101 MHz,  $\text{CDCl}_3$ ) of compound **3m**

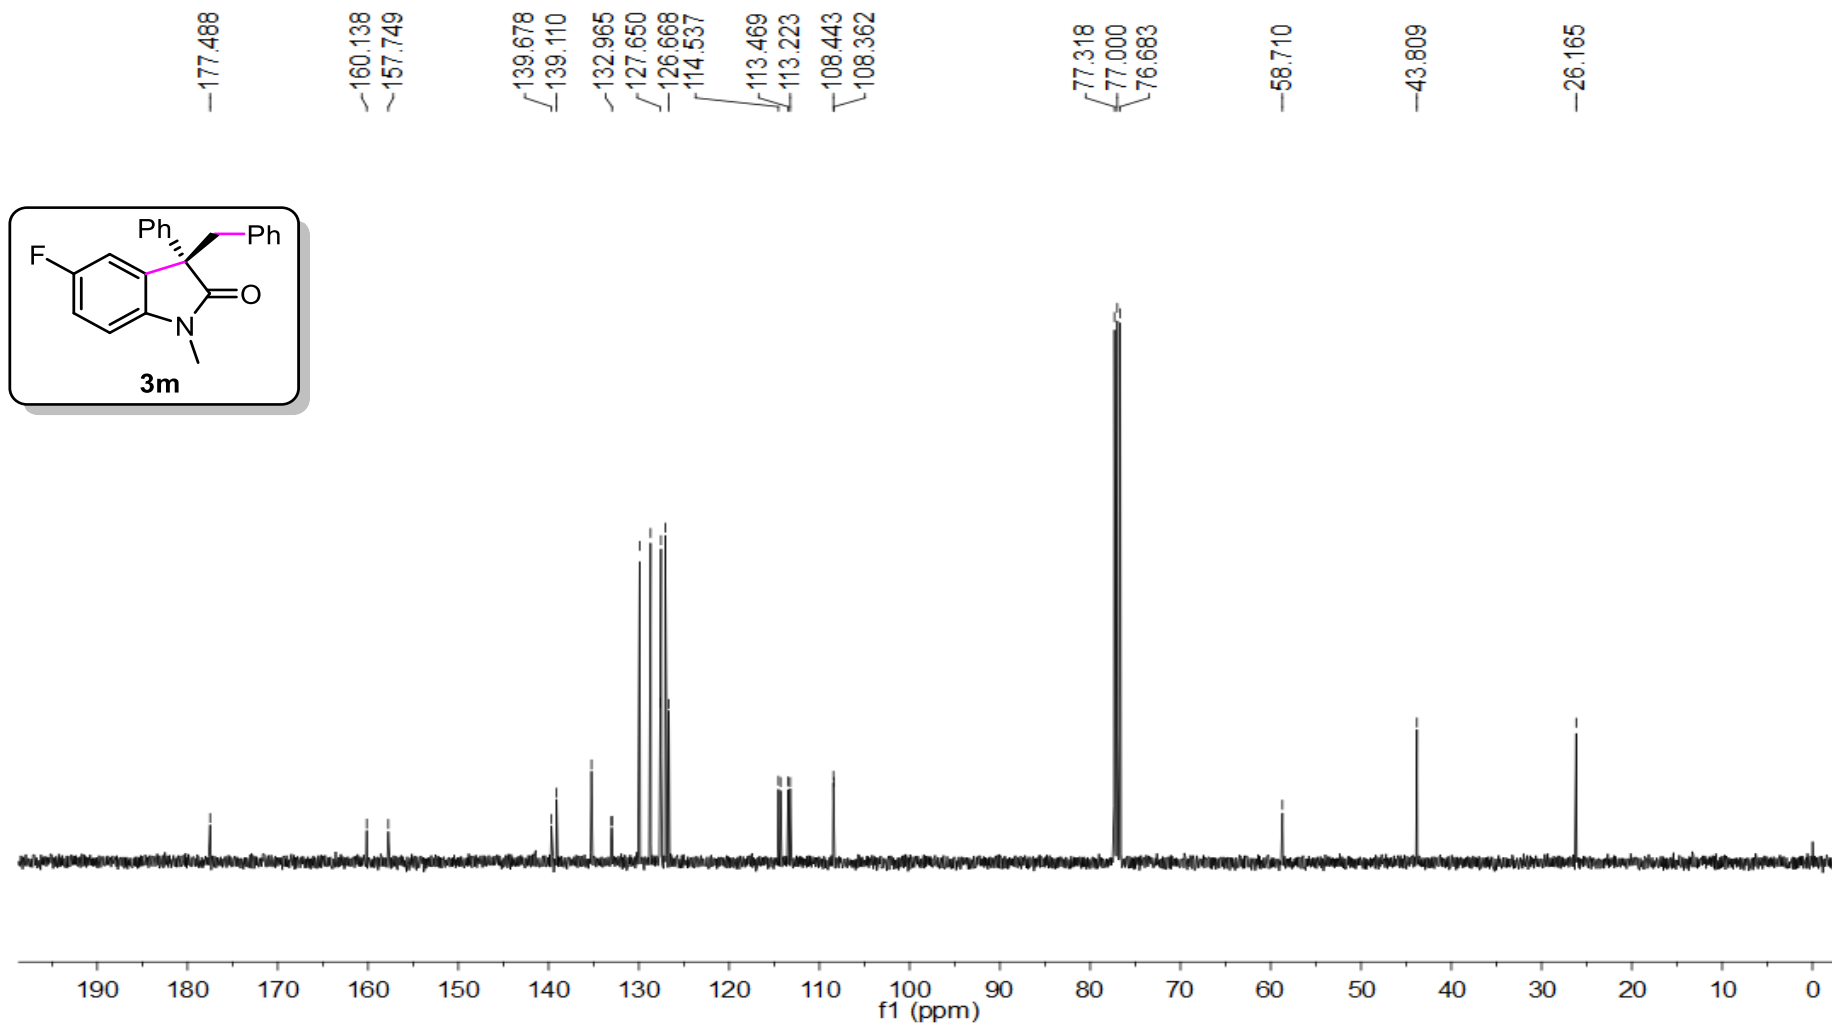

$^1\text{H}$  NMR (400 MHz,  $\text{CDCl}_3$ ) of compound **3n**

7.349  
7.294  
7.270  
7.129  
7.089  
7.063  
7.031  
7.009  
6.735  
6.362  
6.357  
6.340  
6.334  
3.711  
3.679  
3.438  
3.406  
2.920

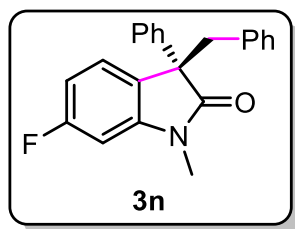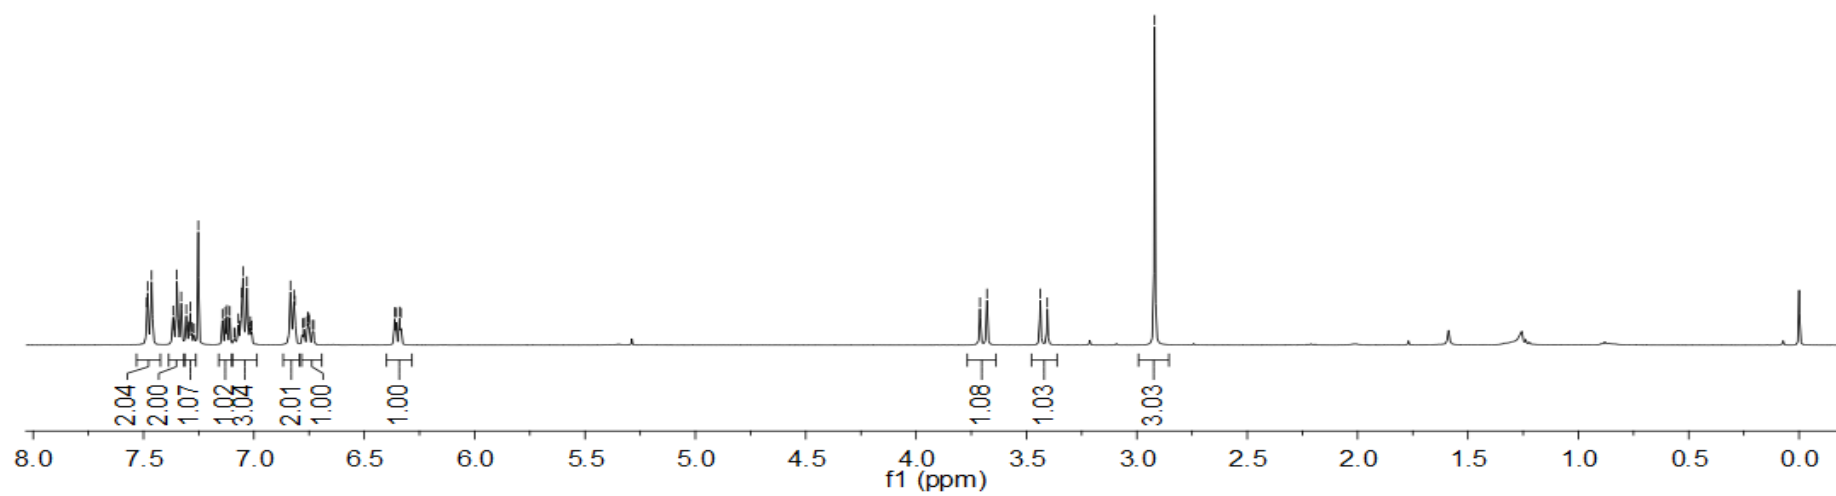

$^{13}\text{C}$  NMR (101 MHz,  $\text{CDCl}_3$ ) of compound **3n**

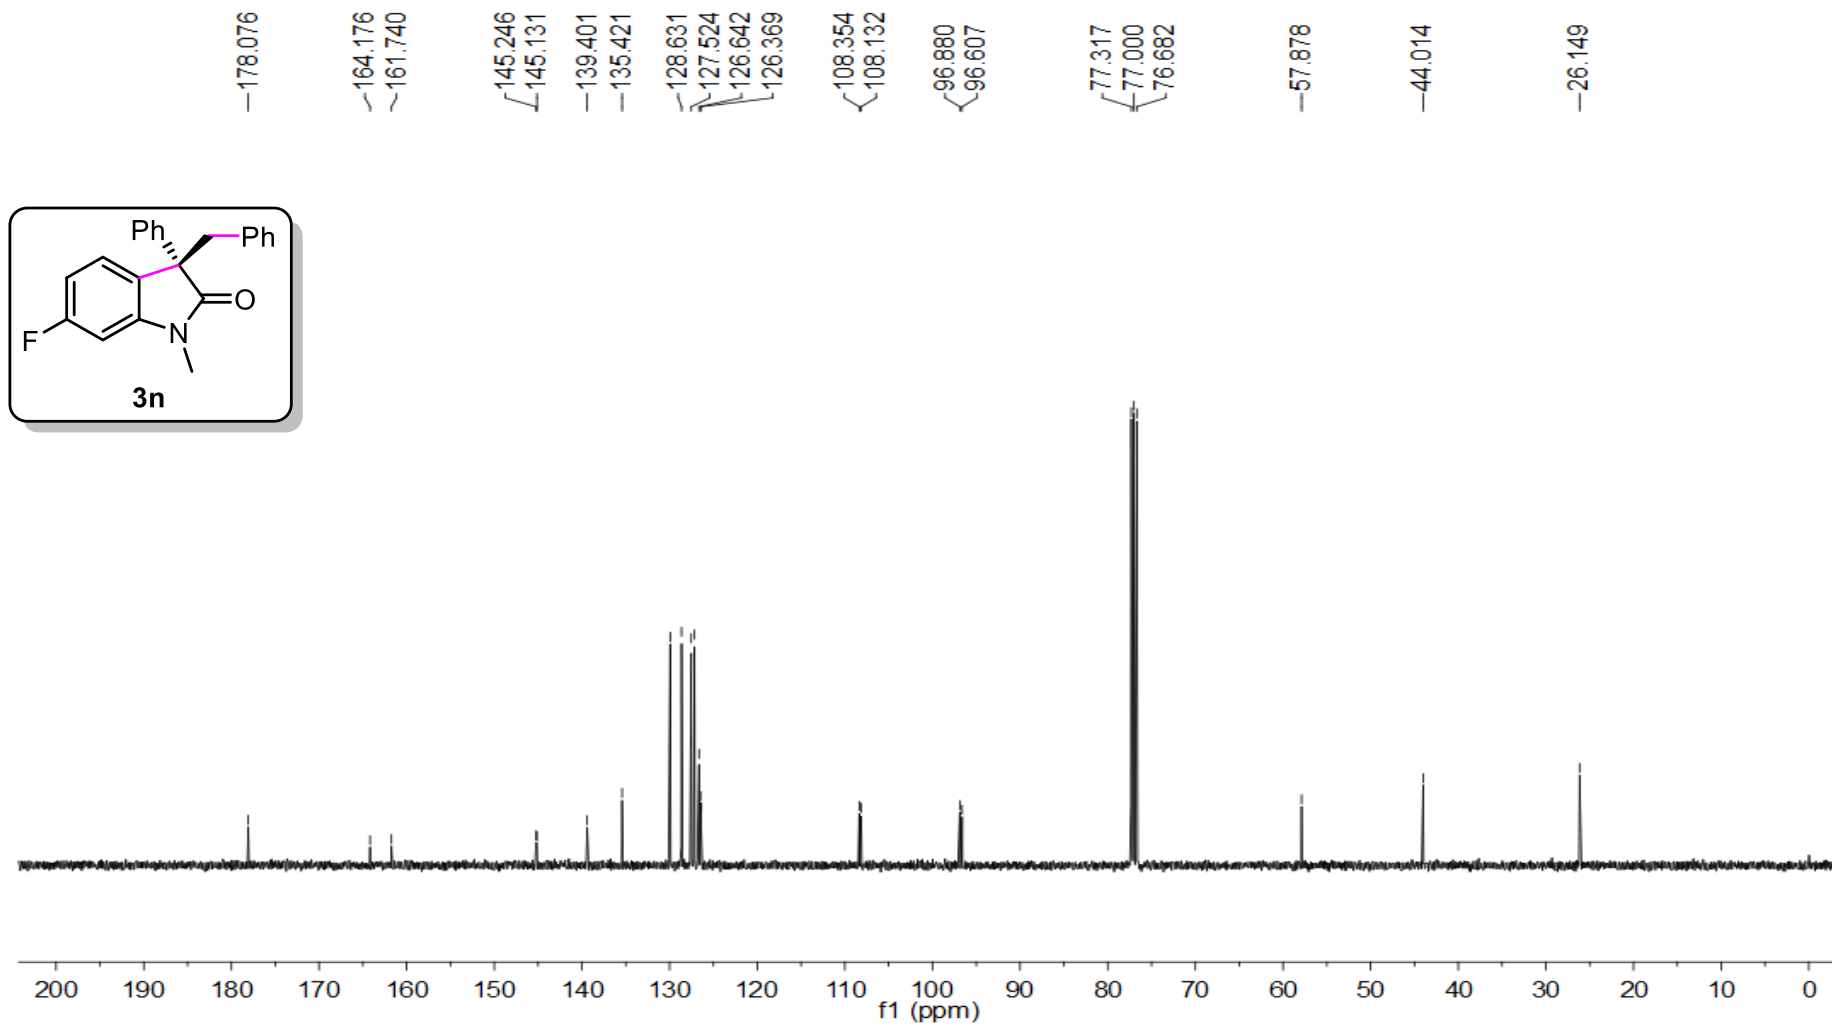

$^1\text{H}$  NMR (400 MHz,  $\text{CDCl}_3$ ) of compound **3o**

7.459  
7.444  
7.358  
7.340  
7.315  
7.300  
7.183  
7.054  
6.848  
6.520  
6.502

3.725  
3.693  
3.443  
3.412  
2.916

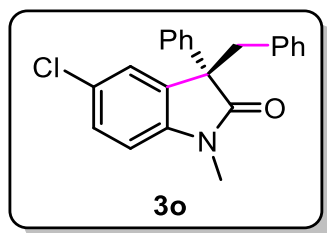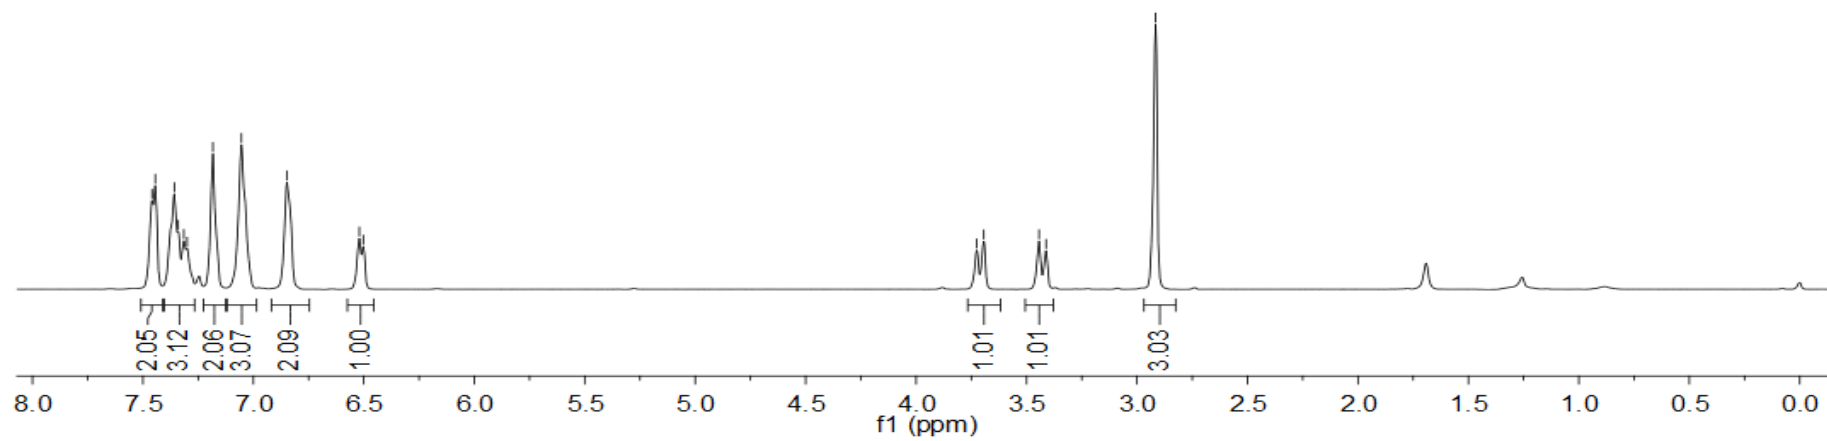

$^{13}\text{C}$  NMR (101 MHz,  $\text{CDCl}_3$ ) of compound **3o**

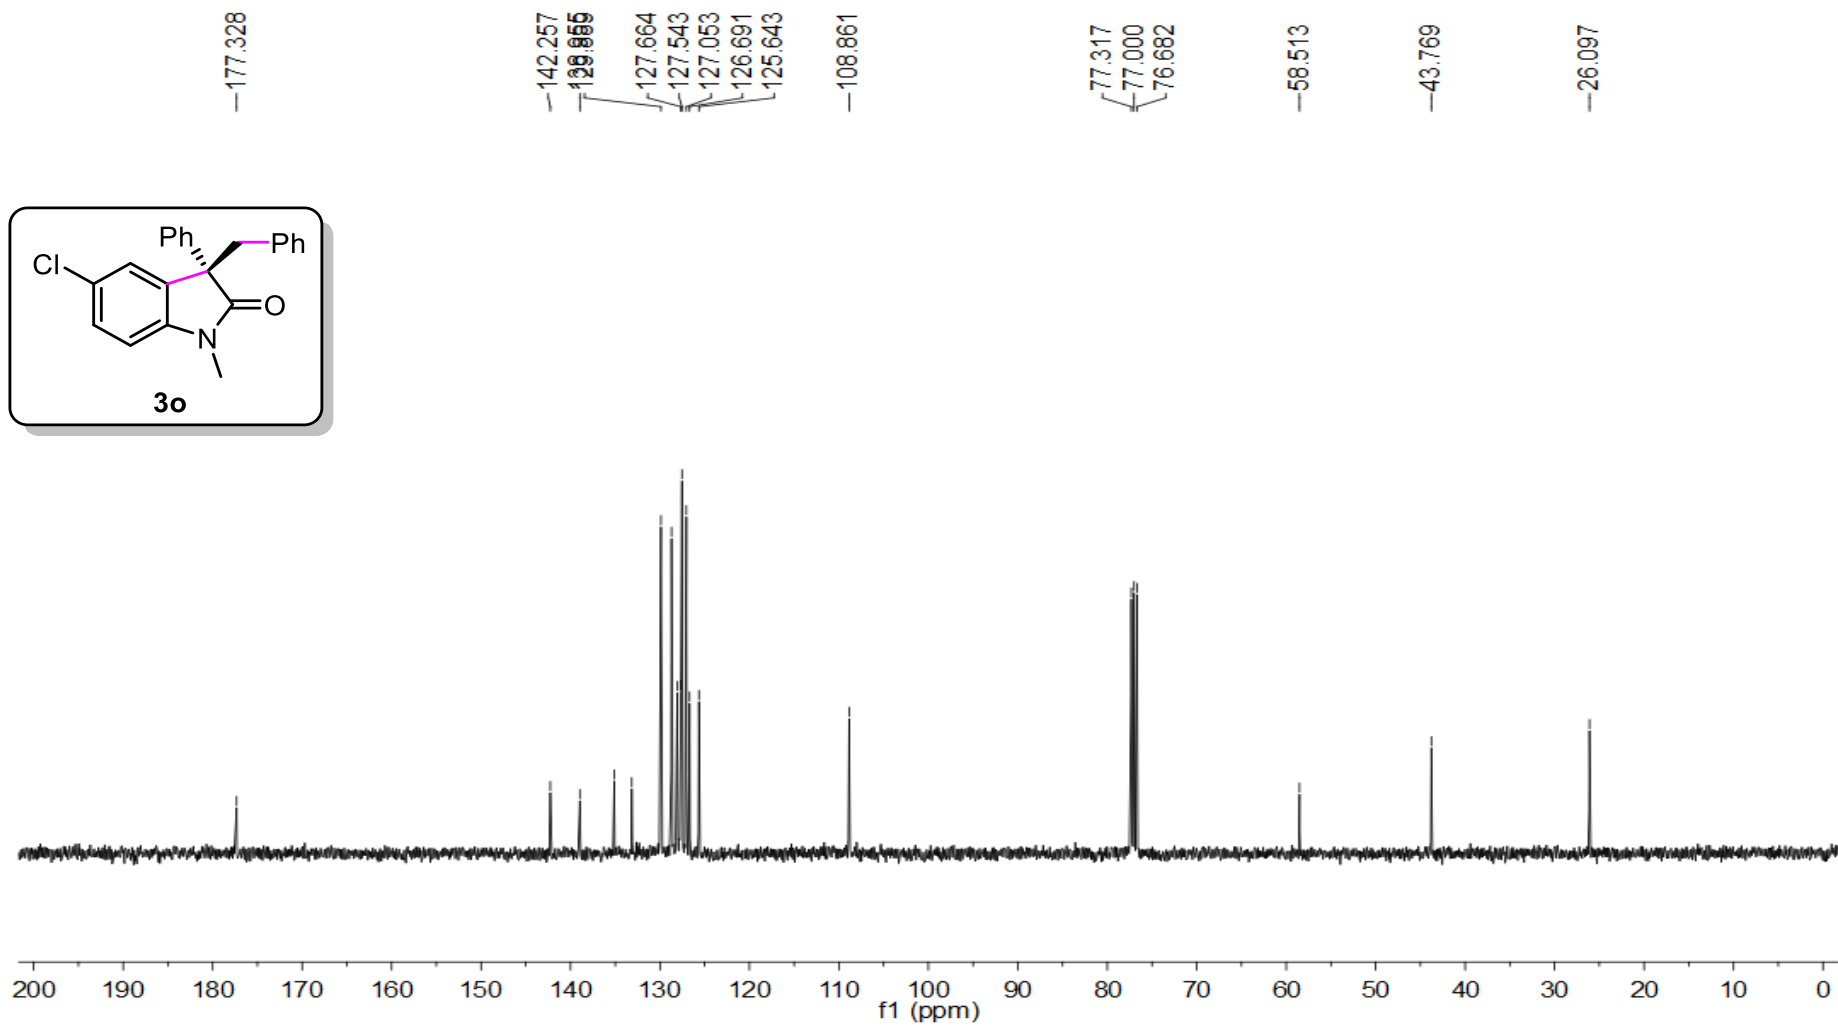

<sup>1</sup>H NMR (400 MHz, CDCl<sub>3</sub>) of compound **3p**

7.463  
7.460  
7.456  
7.442  
7.385  
7.383  
7.378  
7.365  
7.361  
7.346  
7.343  
7.338  
7.334  
7.322  
7.318  
7.315  
7.311  
7.306  
7.255  
7.252  
7.075  
7.062  
7.045  
7.030  
6.850  
6.847  
6.833  
6.828  
6.485  
6.465

3.720  
3.688  
3.447  
3.415  
-2.916

-0.000

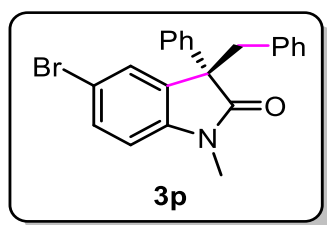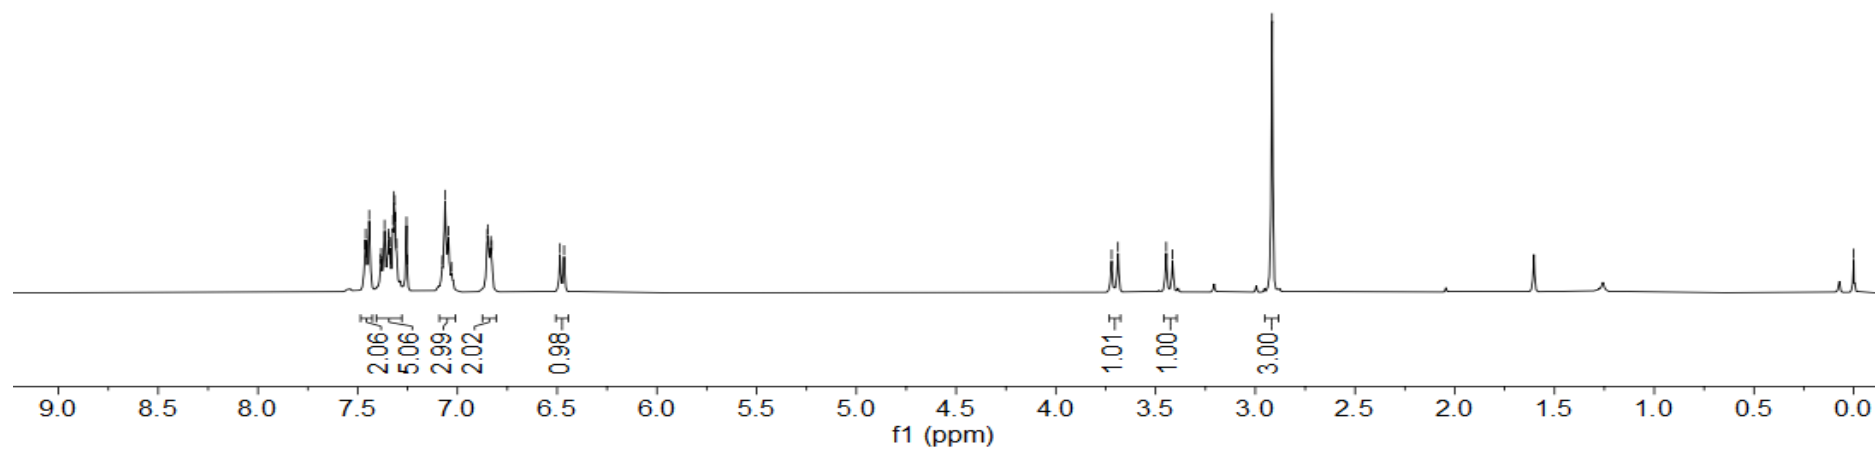

$^{13}\text{C}$  NMR (101 MHz,  $\text{CDCl}_3$ ) of compound **3p**

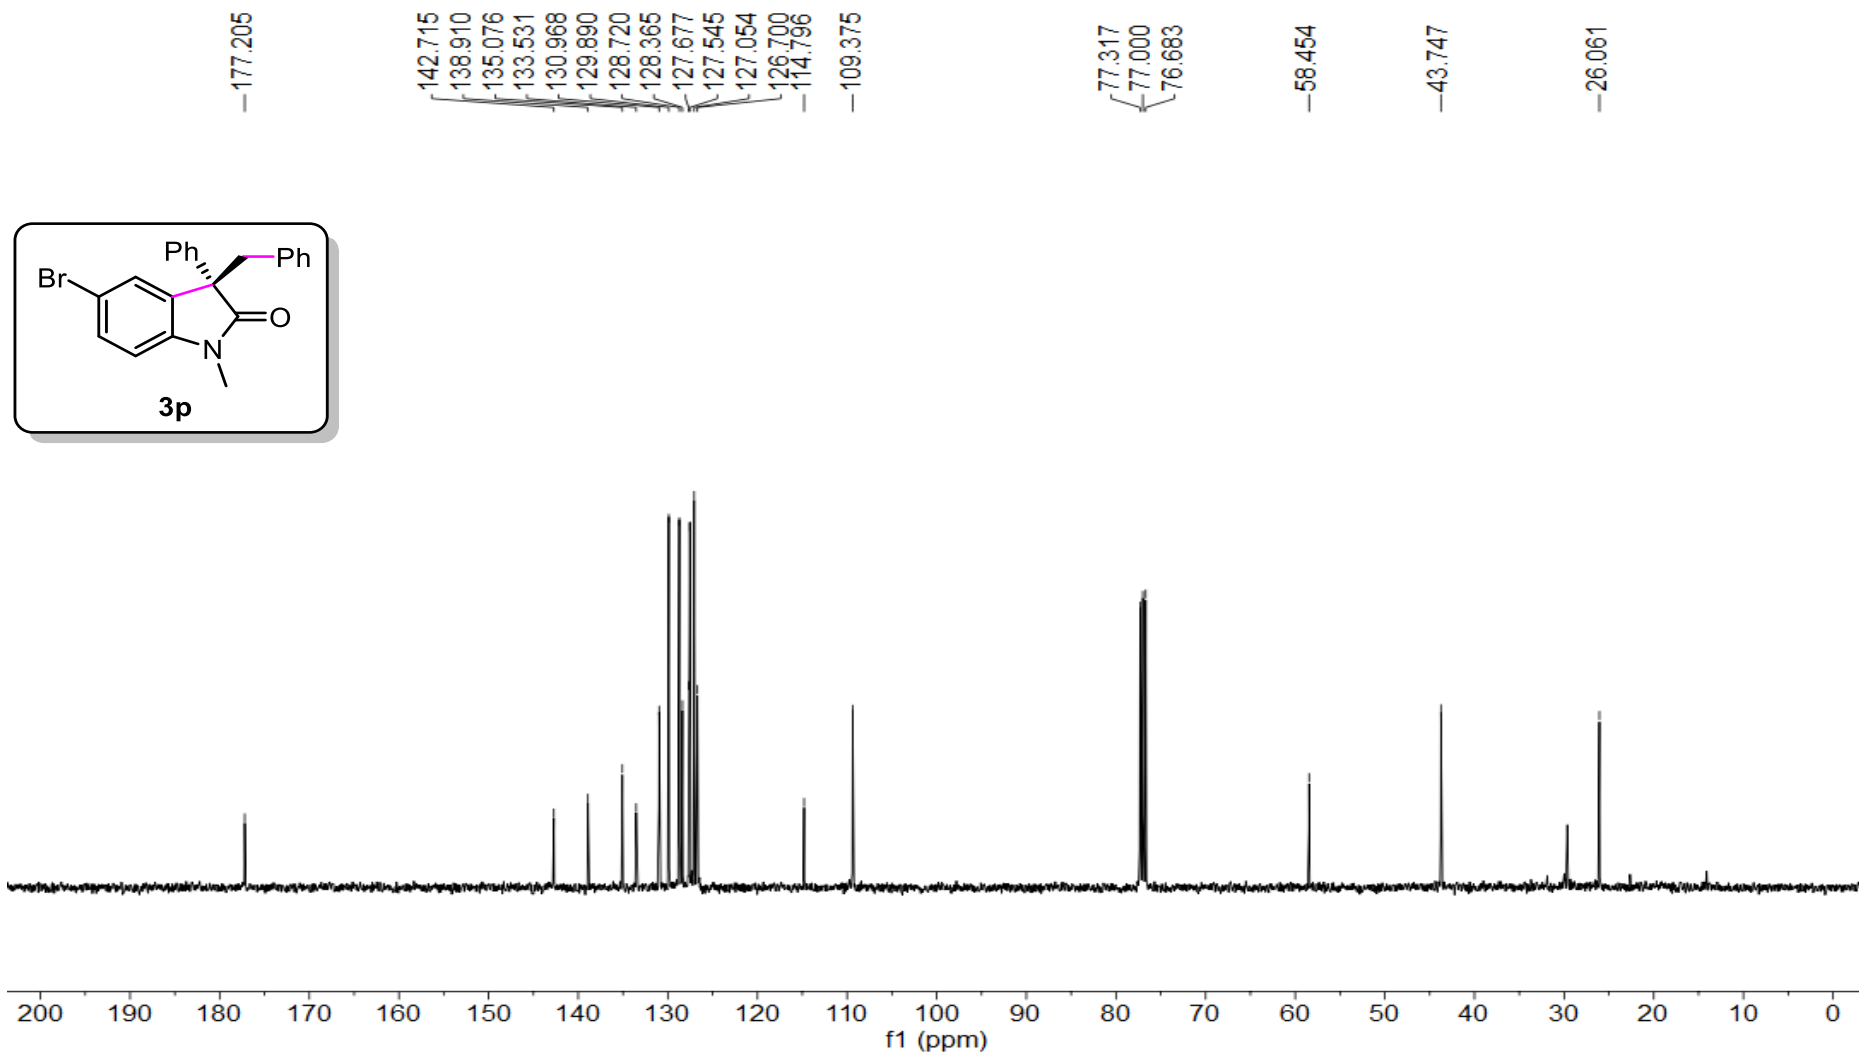



$^1\text{H}$  NMR (400 MHz,  $\text{CDCl}_3$ ) of compound **3q**

7.447  
7.393  
7.372  
7.353  
7.329  
7.308  
7.252  
-6.995  
-6.801  
-6.784  
-6.780  
-6.670  
-6.650

3.745  
3.713  
3.489  
3.457  
-2.979

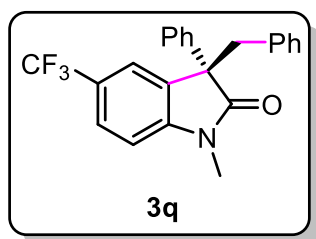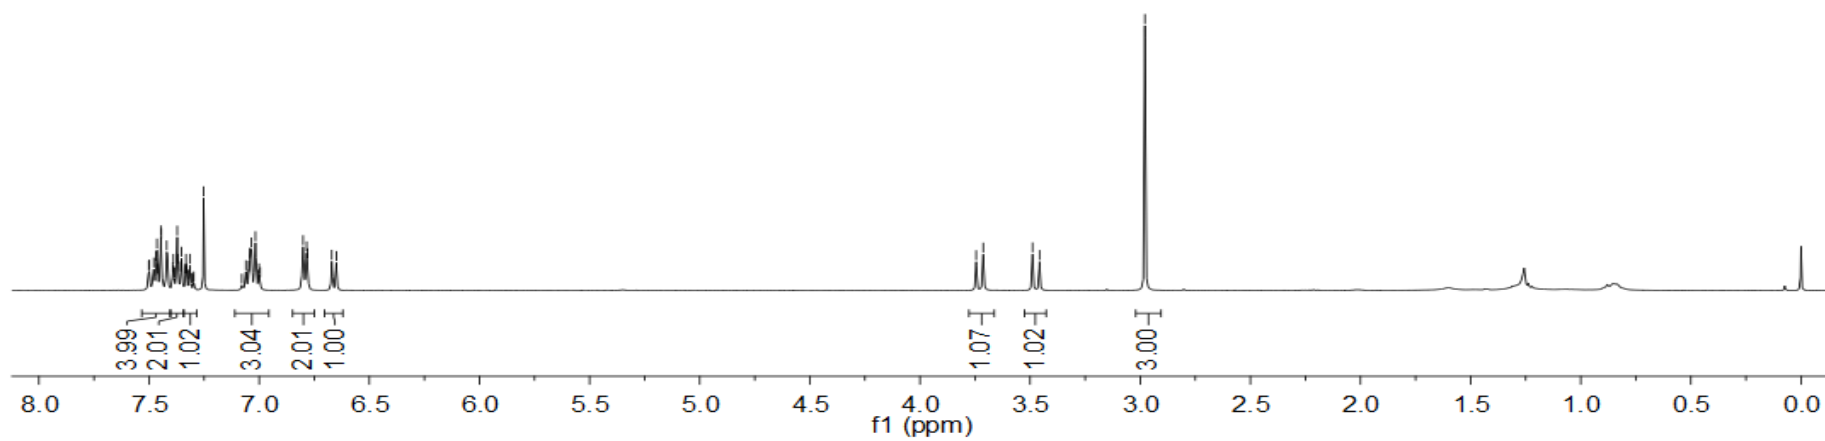

$^{13}\text{C}$  NMR (101 MHz,  $\text{CDCl}_3$ ) of compound **3q**

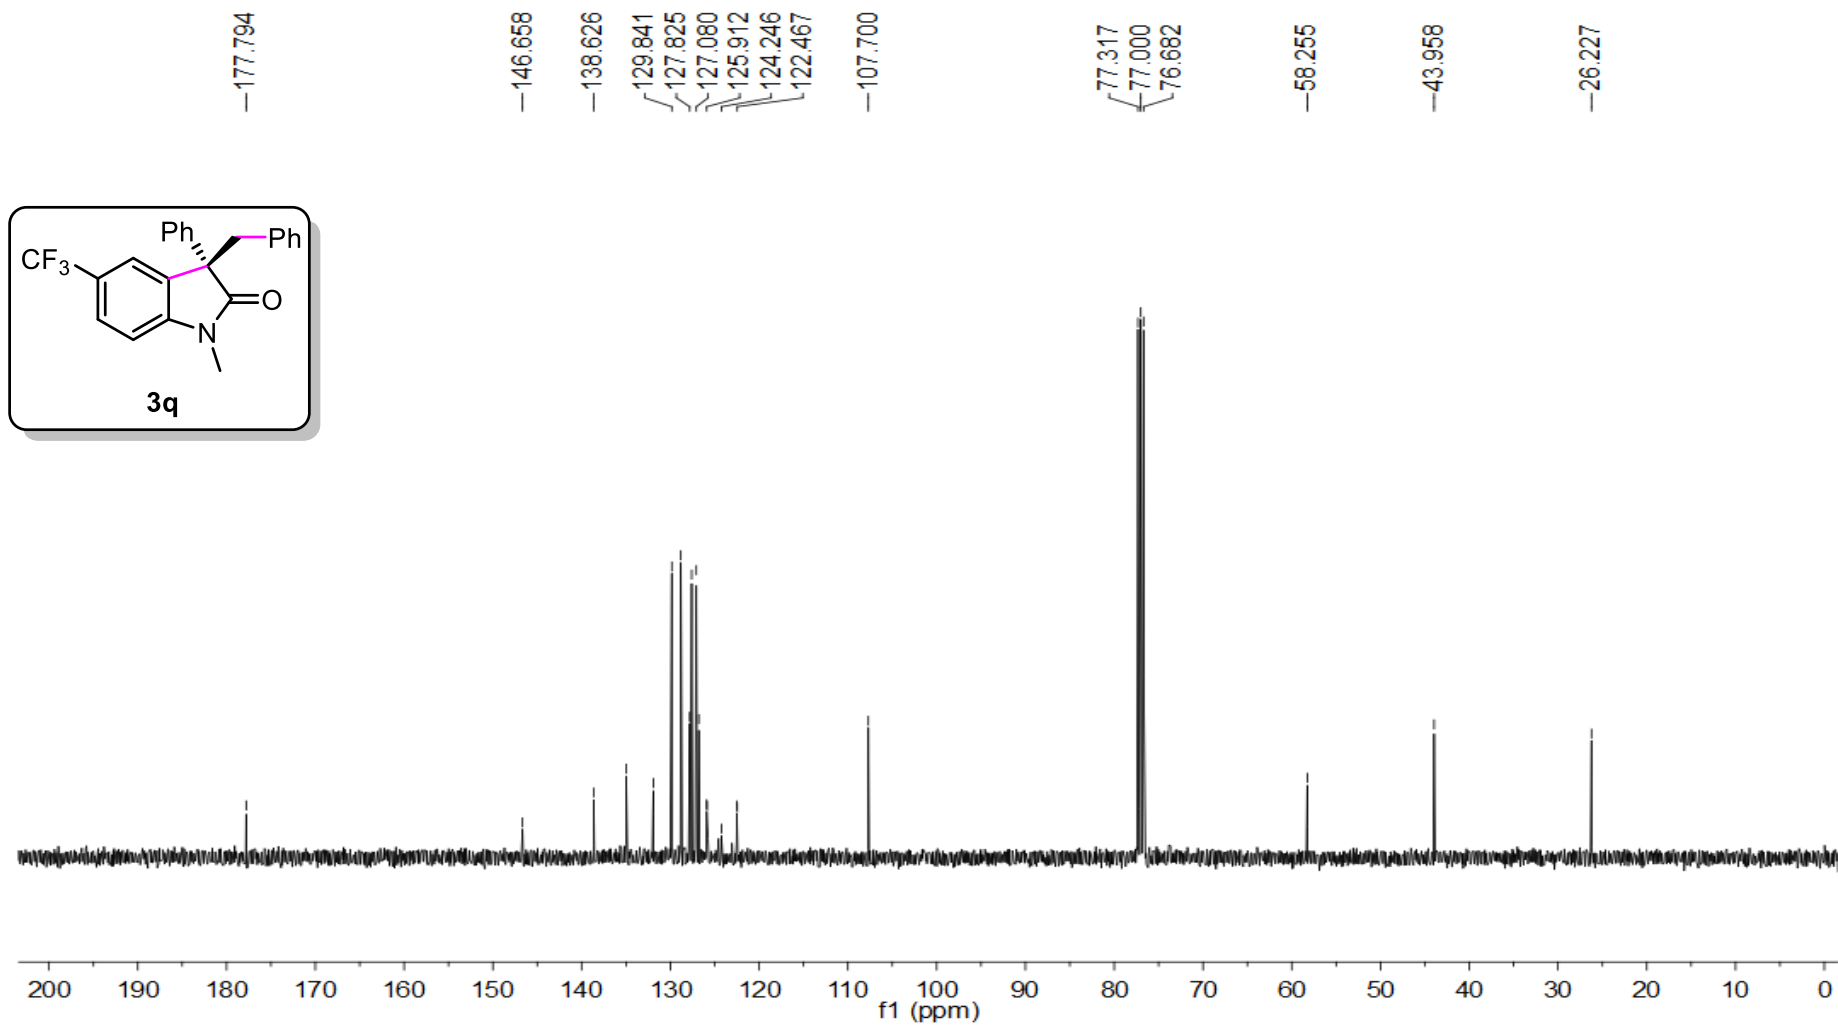

$^1\text{H}$  NMR (400 MHz,  $\text{CDCl}_3$ ) of compound **3r**

7.383  
7.362  
7.246  
7.211  
7.208  
7.193  
7.189  
7.178  
7.175  
7.154  
7.134  
7.079  
7.077  
7.060  
7.039  
7.030  
7.021  
7.017  
6.998  
6.987  
6.982  
6.976  
6.841  
6.838  
6.822  
6.818  
6.600  
6.581  
6.578

3.711  
3.680  
3.437  
3.405

-2.929

-2.323

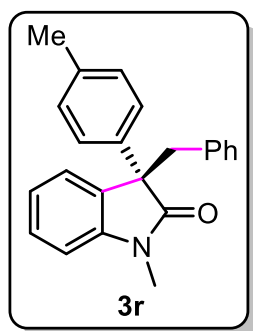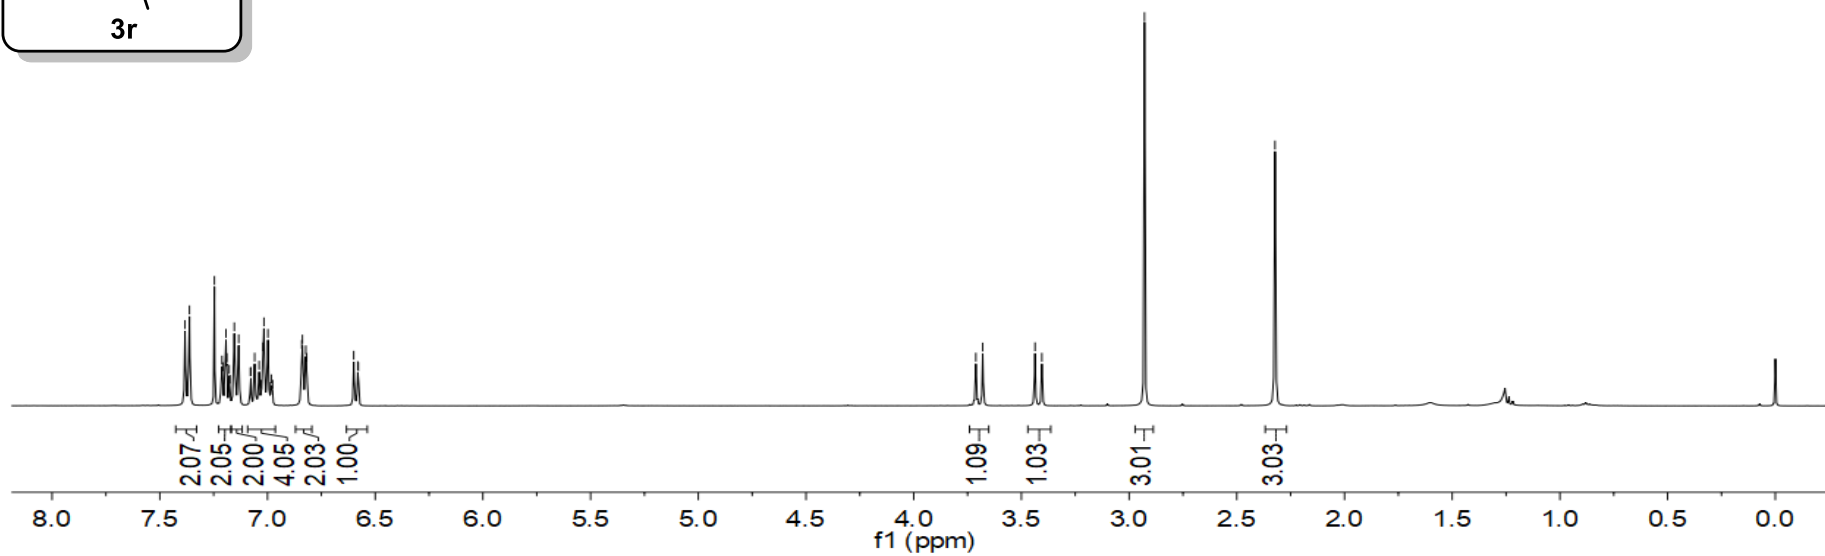

$^{13}\text{C}$  NMR (101 MHz,  $\text{CDCl}_3$ ) of compound **3r**

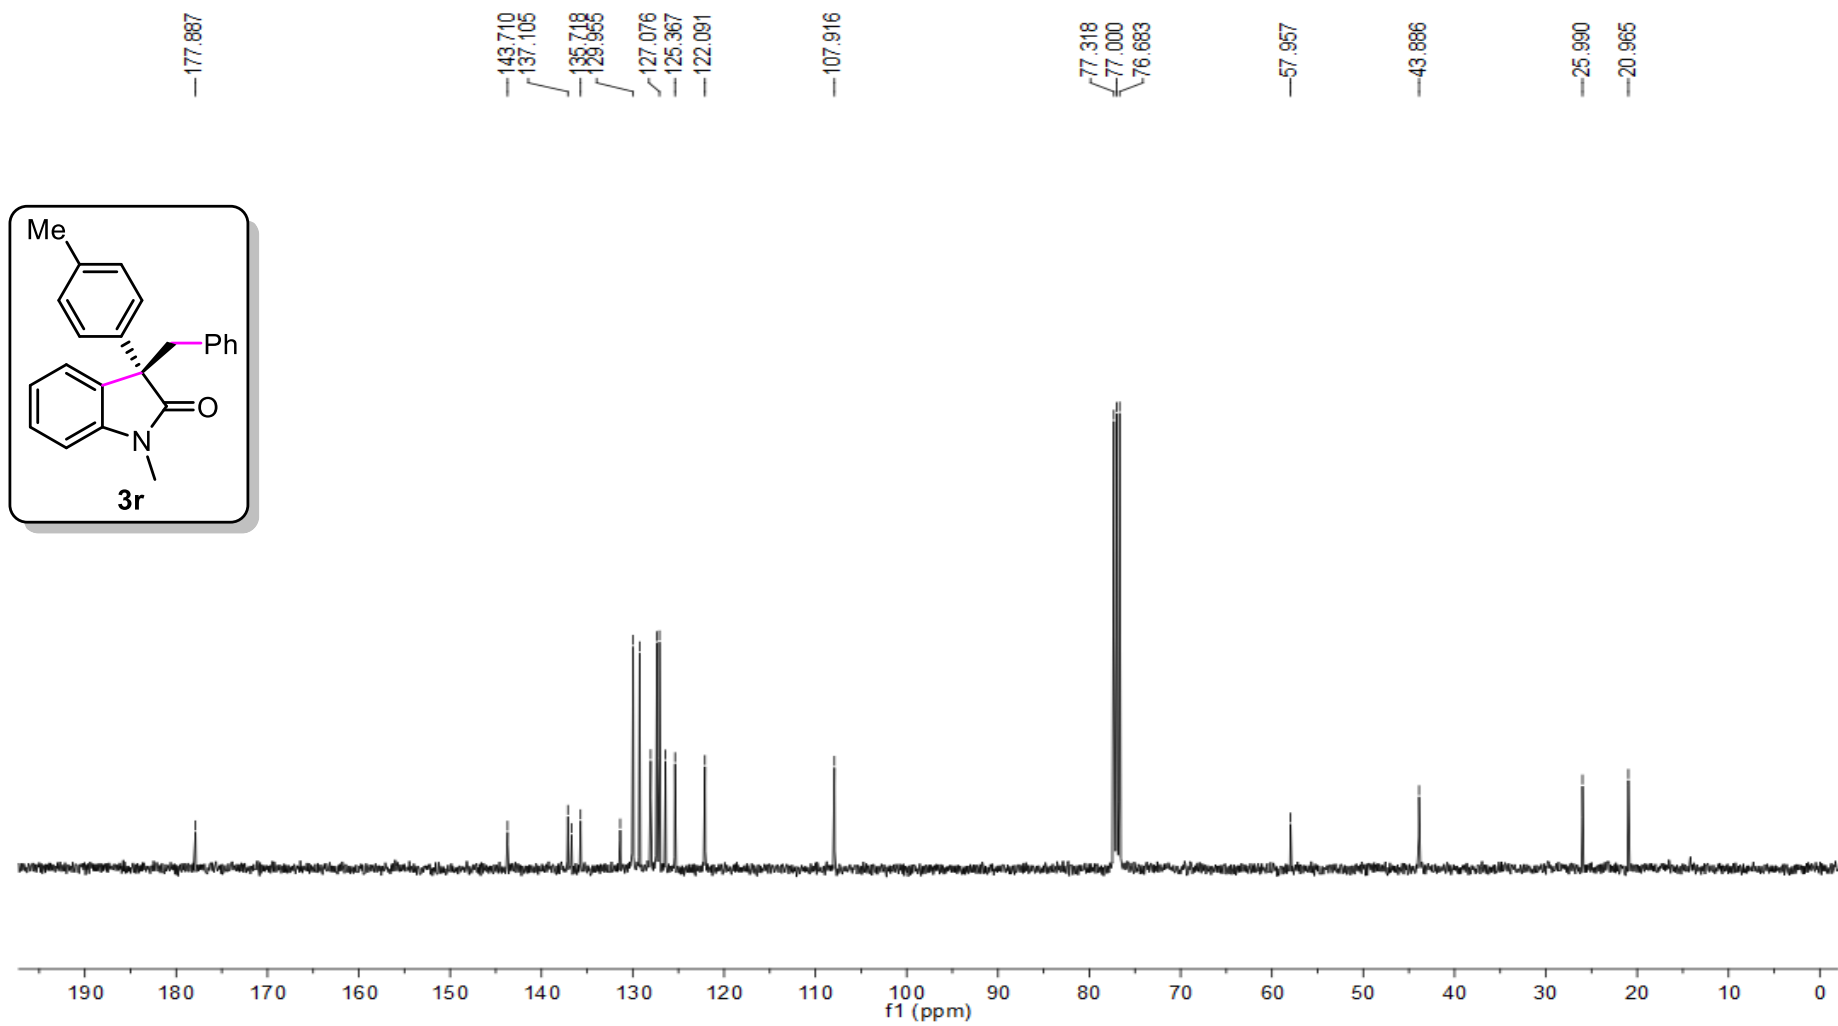

$^1\text{H}$  NMR (400 MHz,  $\text{CDCl}_3$ ) of compound **3s**

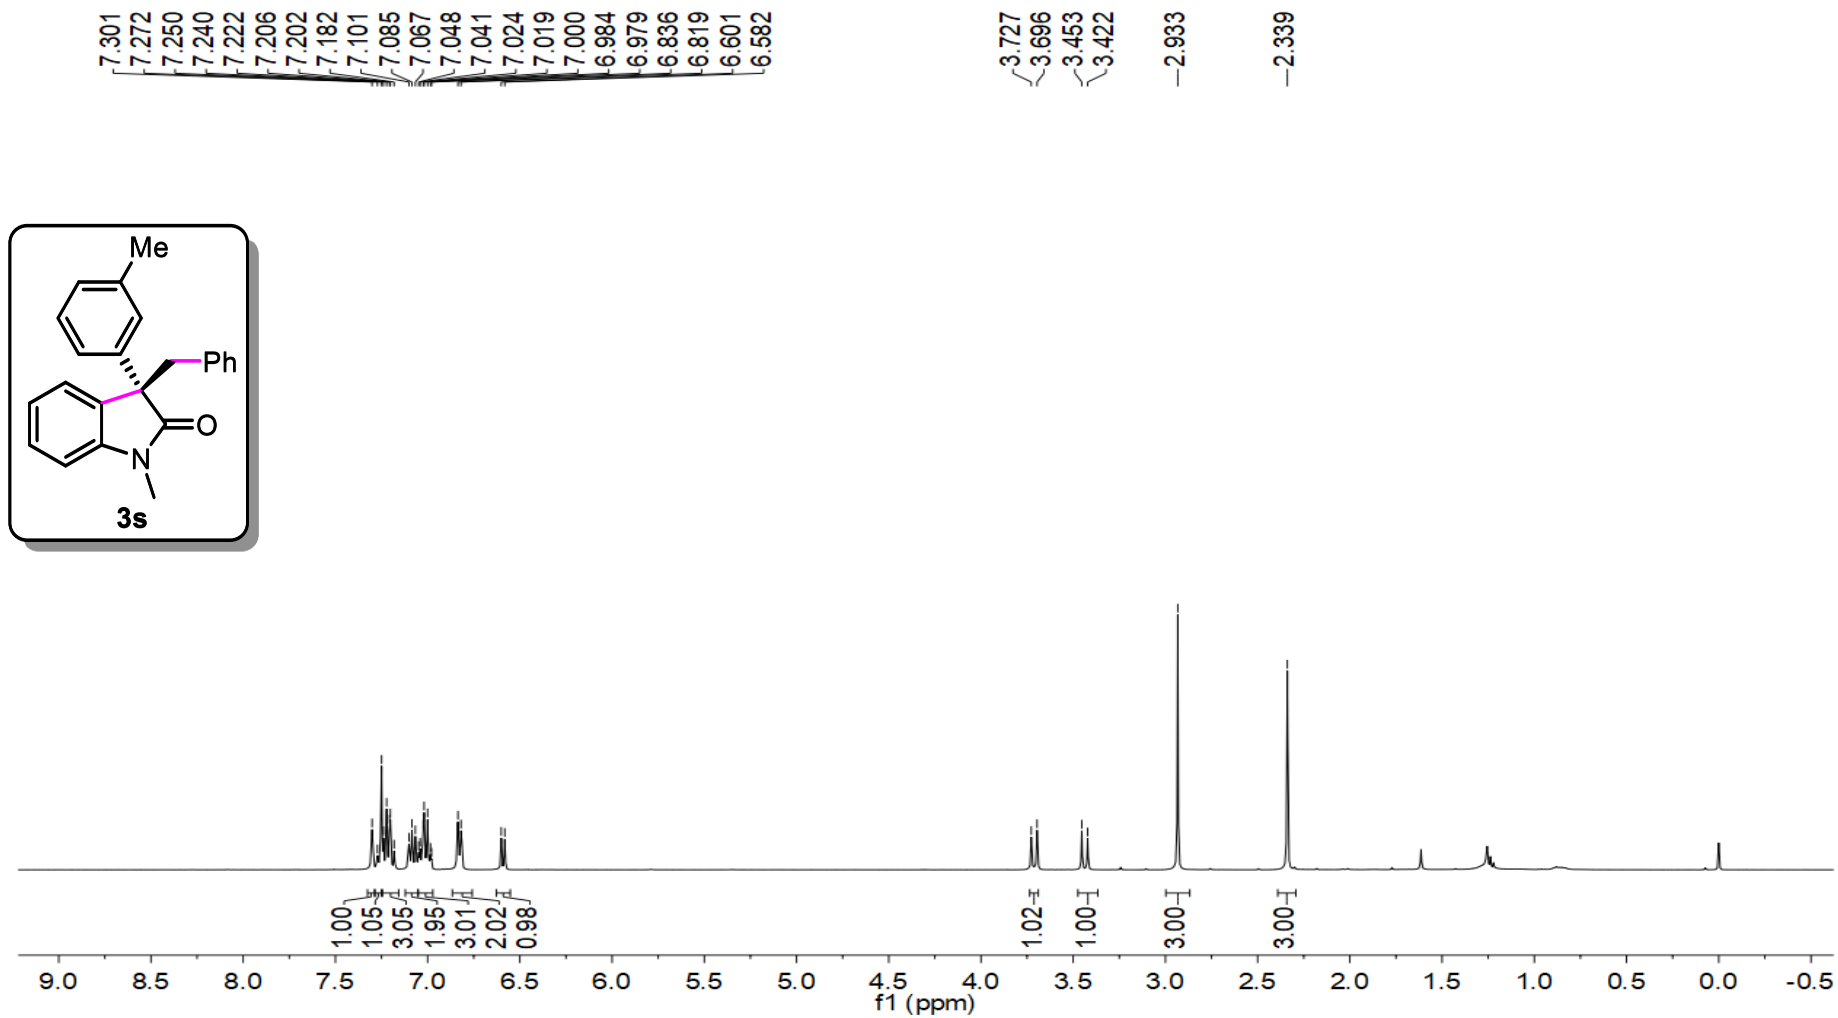

$^{13}\text{C}$  NMR (101 MHz,  $\text{CDCl}_3$ ) of compound **3s**

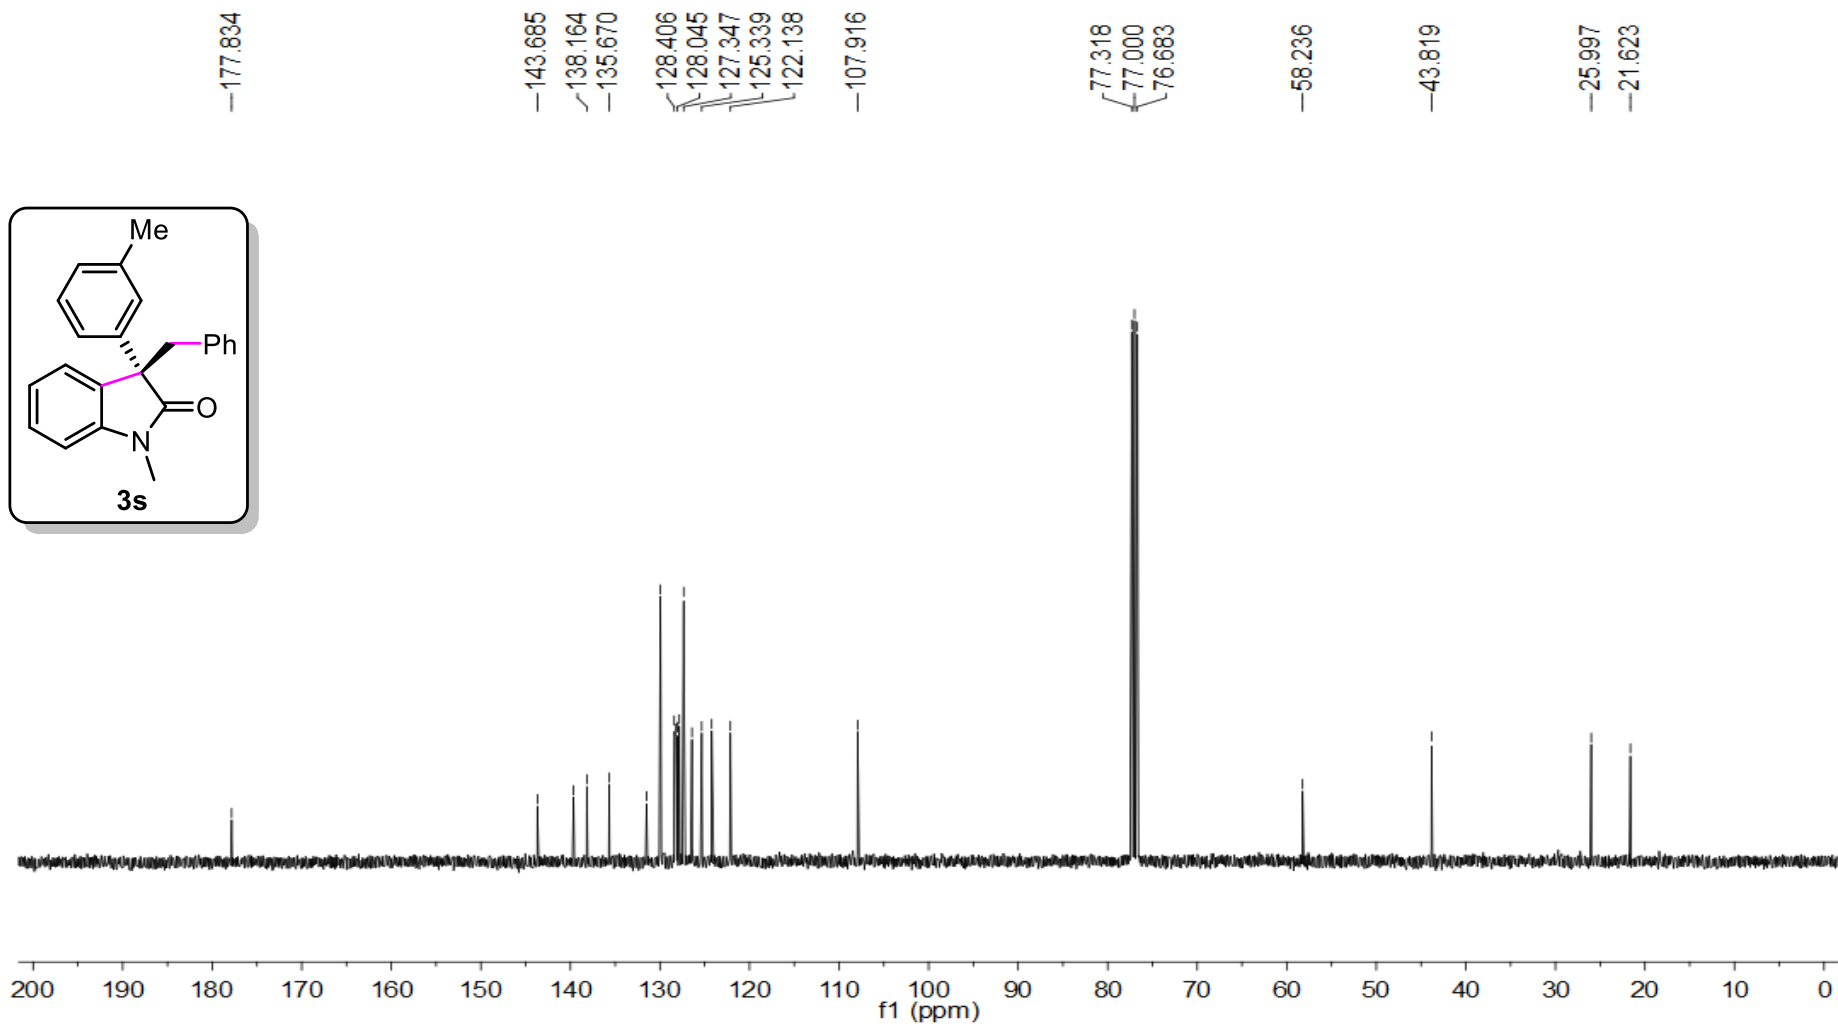

$^1\text{H}$  NMR (400 MHz,  $\text{CDCl}_3$ ) of compound **3t**

7.428  
7.402  
7.045  
6.988  
6.817  
6.612  
6.593

3.787  
3.680  
3.648  
3.425  
3.393  
-2.938

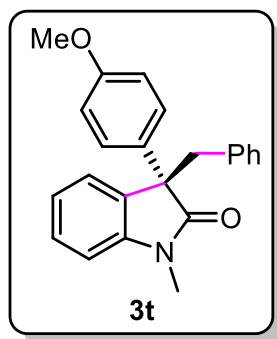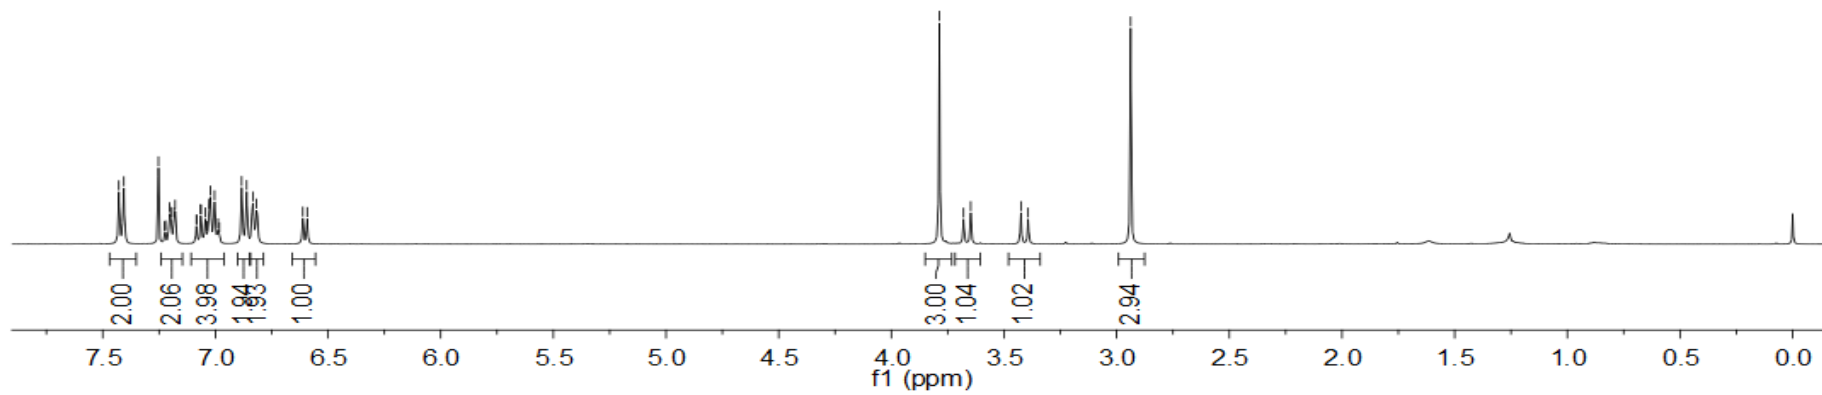

$^{13}\text{C}$  NMR (101 MHz,  $\text{CDCl}_3$ ) of compound **3t**

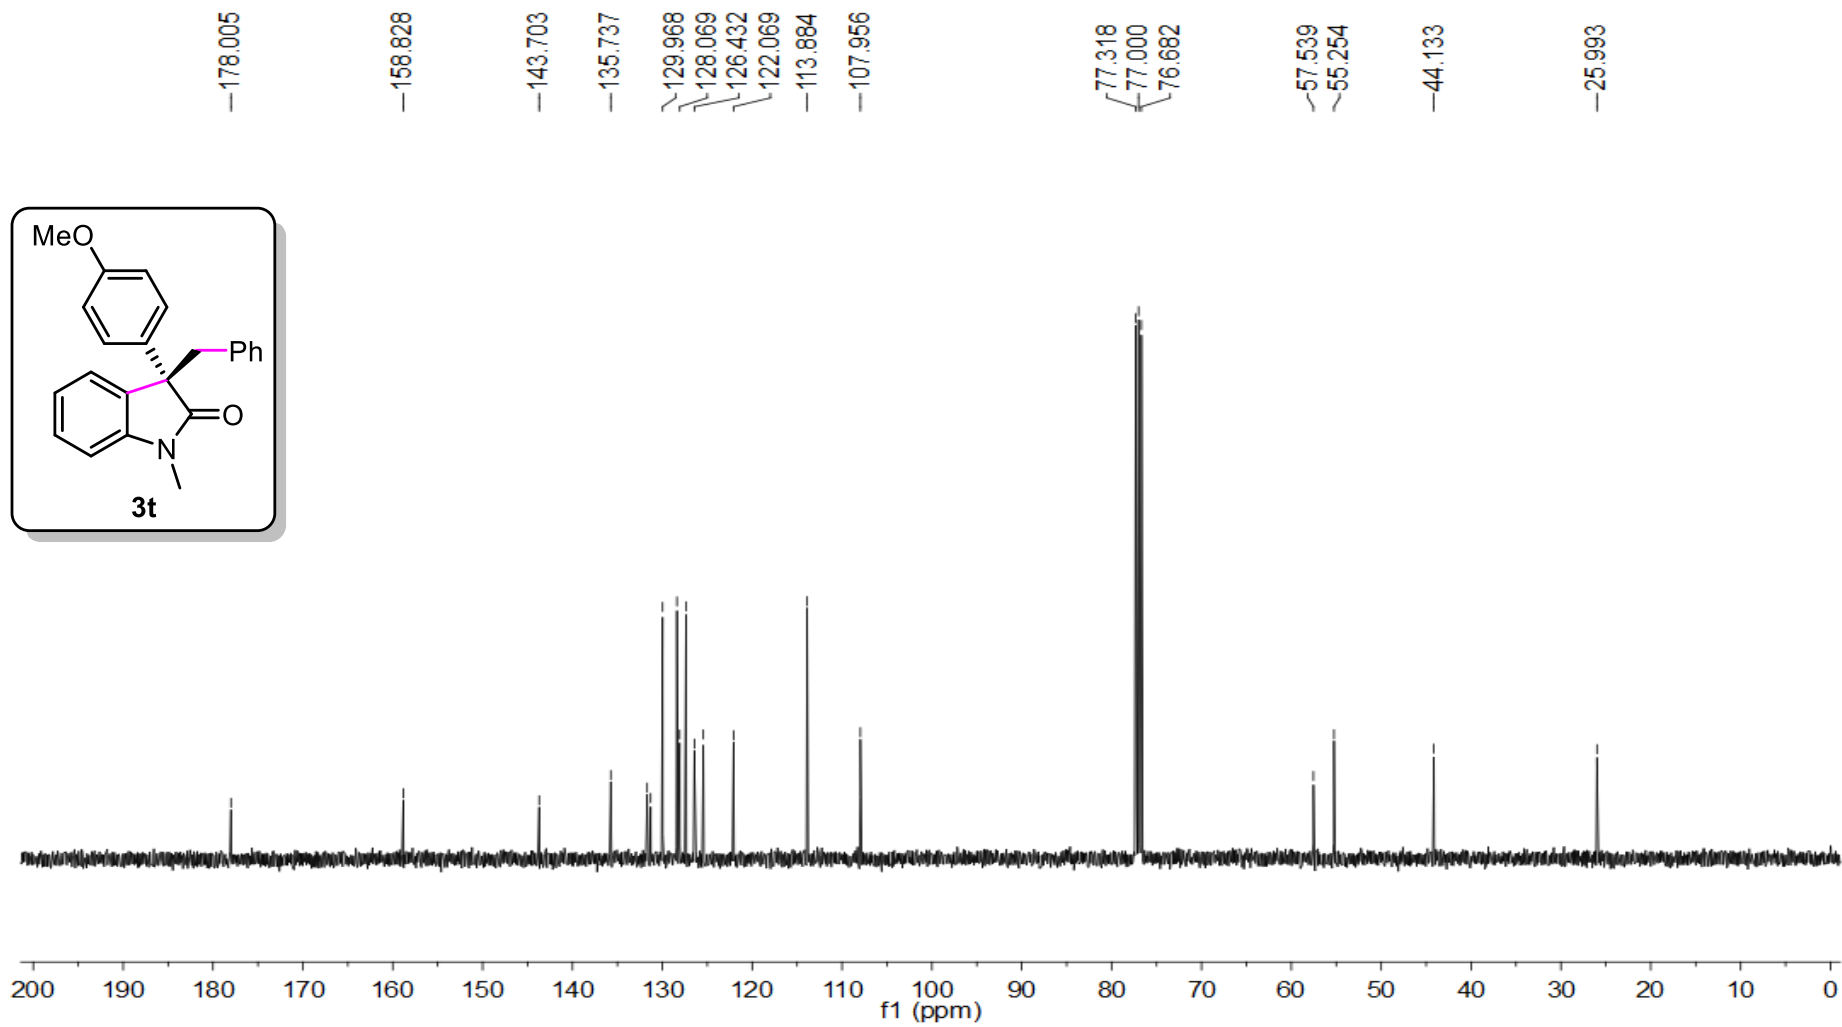



$^1\text{H}$  NMR (400 MHz,  $\text{CDCl}_3$ ) of compound **3u**

7.488  
7.483  
7.479  
7.471  
7.466  
7.258  
6.991  
6.805  
6.630  
6.611

3.669  
3.637  
3.425  
3.393  
2.948

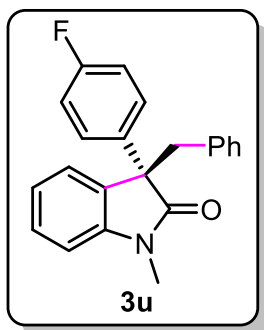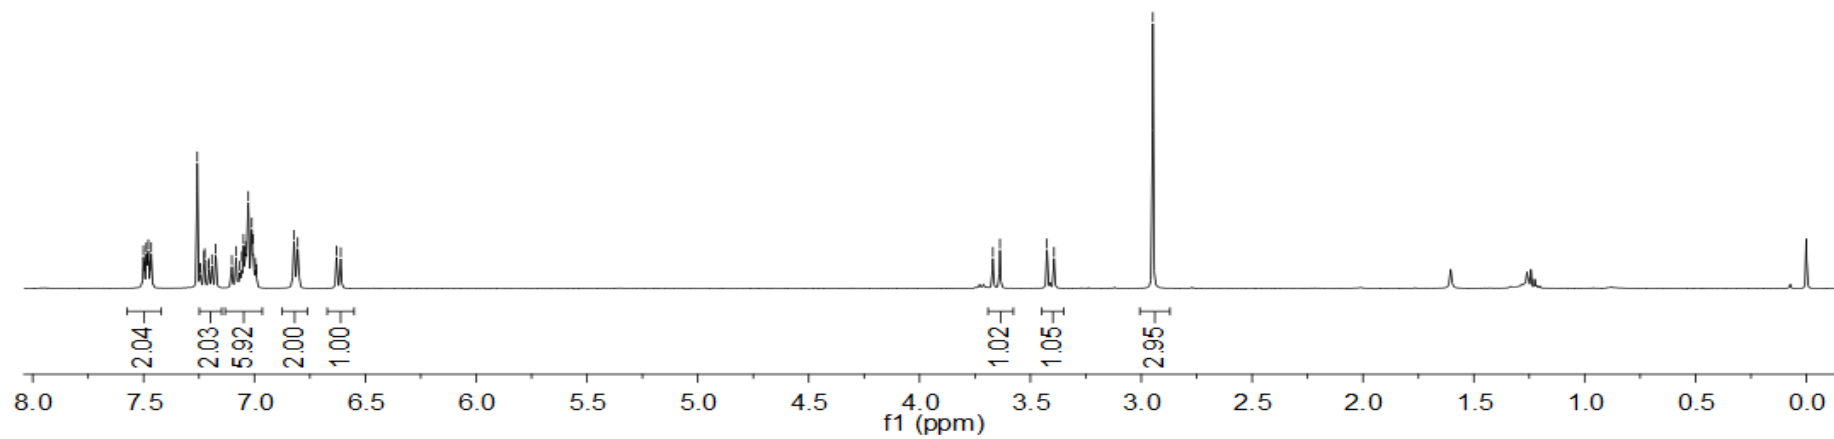

$^{13}\text{C}$  NMR (101 MHz,  $\text{CDCl}_3$ ) of compound **3u**

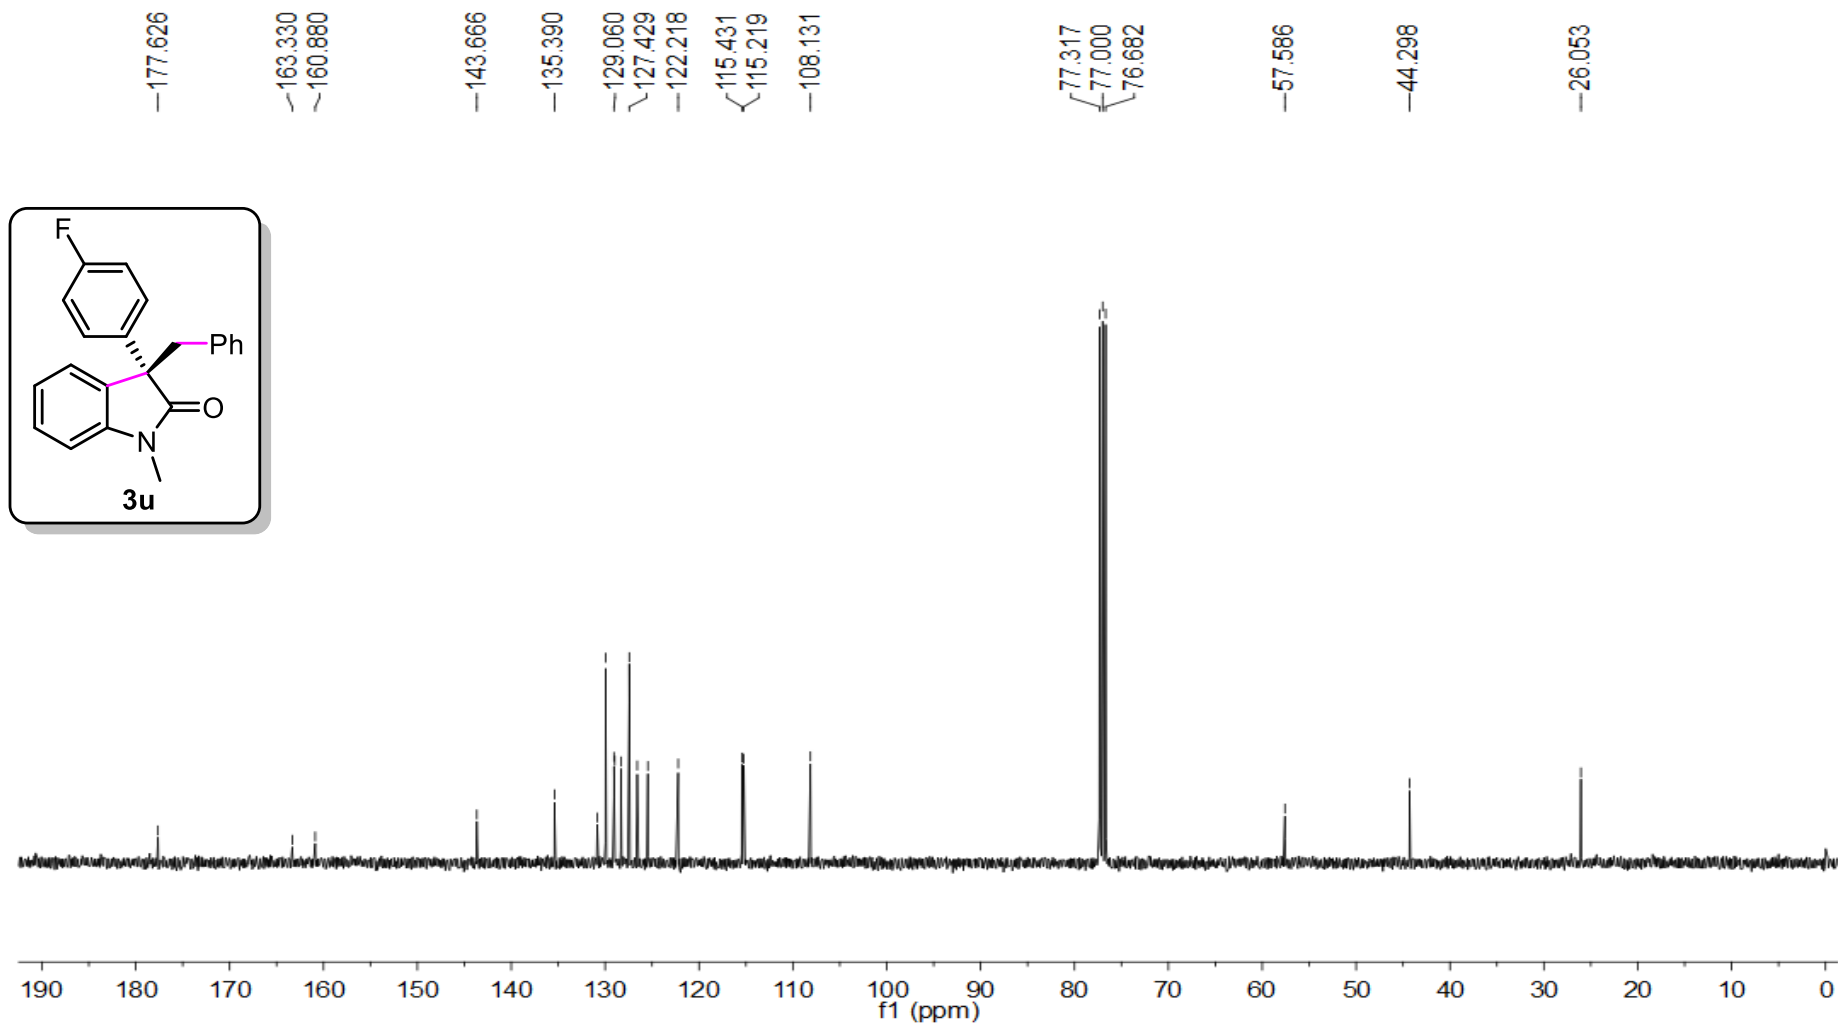

$^1\text{H}$  NMR (400 MHz,  $\text{CDCl}_3$ ) of compound **3v**

7.409  
7.269  
7.230  
7.111  
7.074  
7.039  
6.995  
6.802  
6.626  
6.606

3.679  
3.647  
3.430  
3.399  
2.945

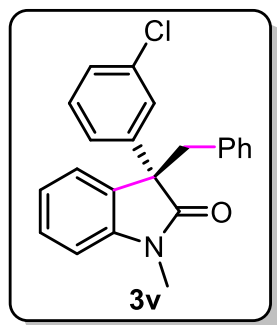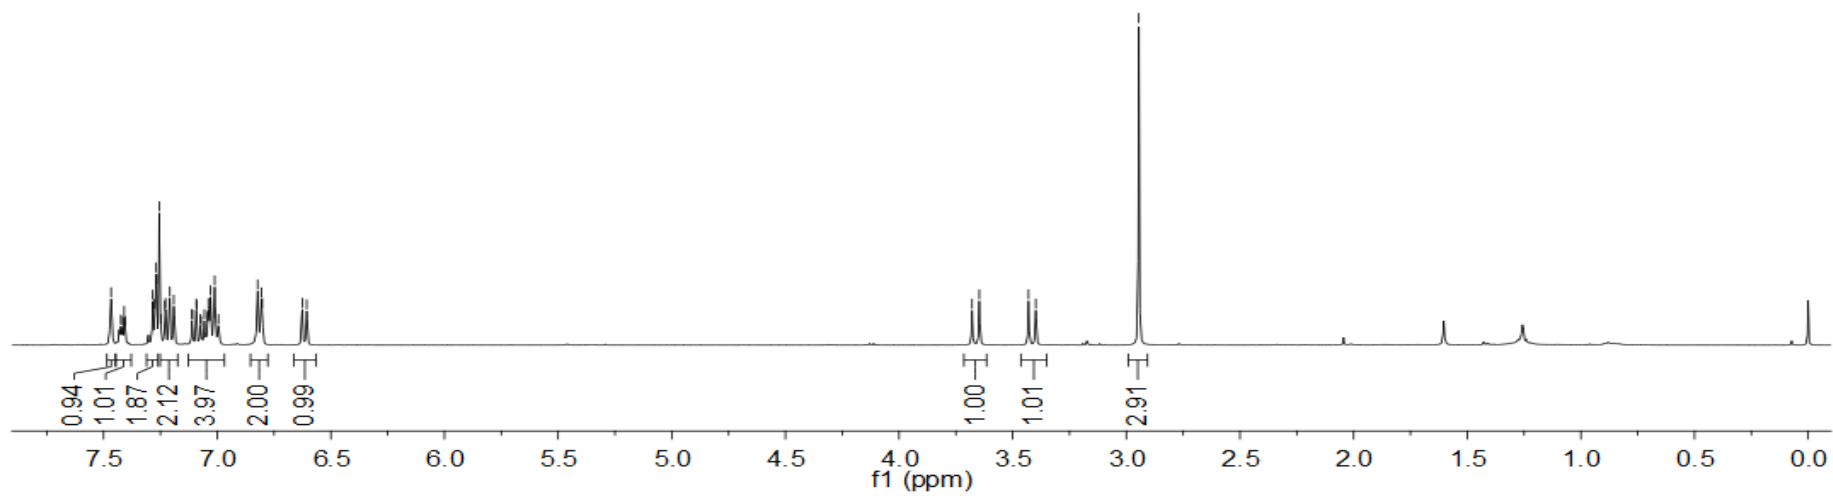

$^{13}\text{C}$  NMR (101 MHz,  $\text{CDCl}_3$ ) of compound **3v**

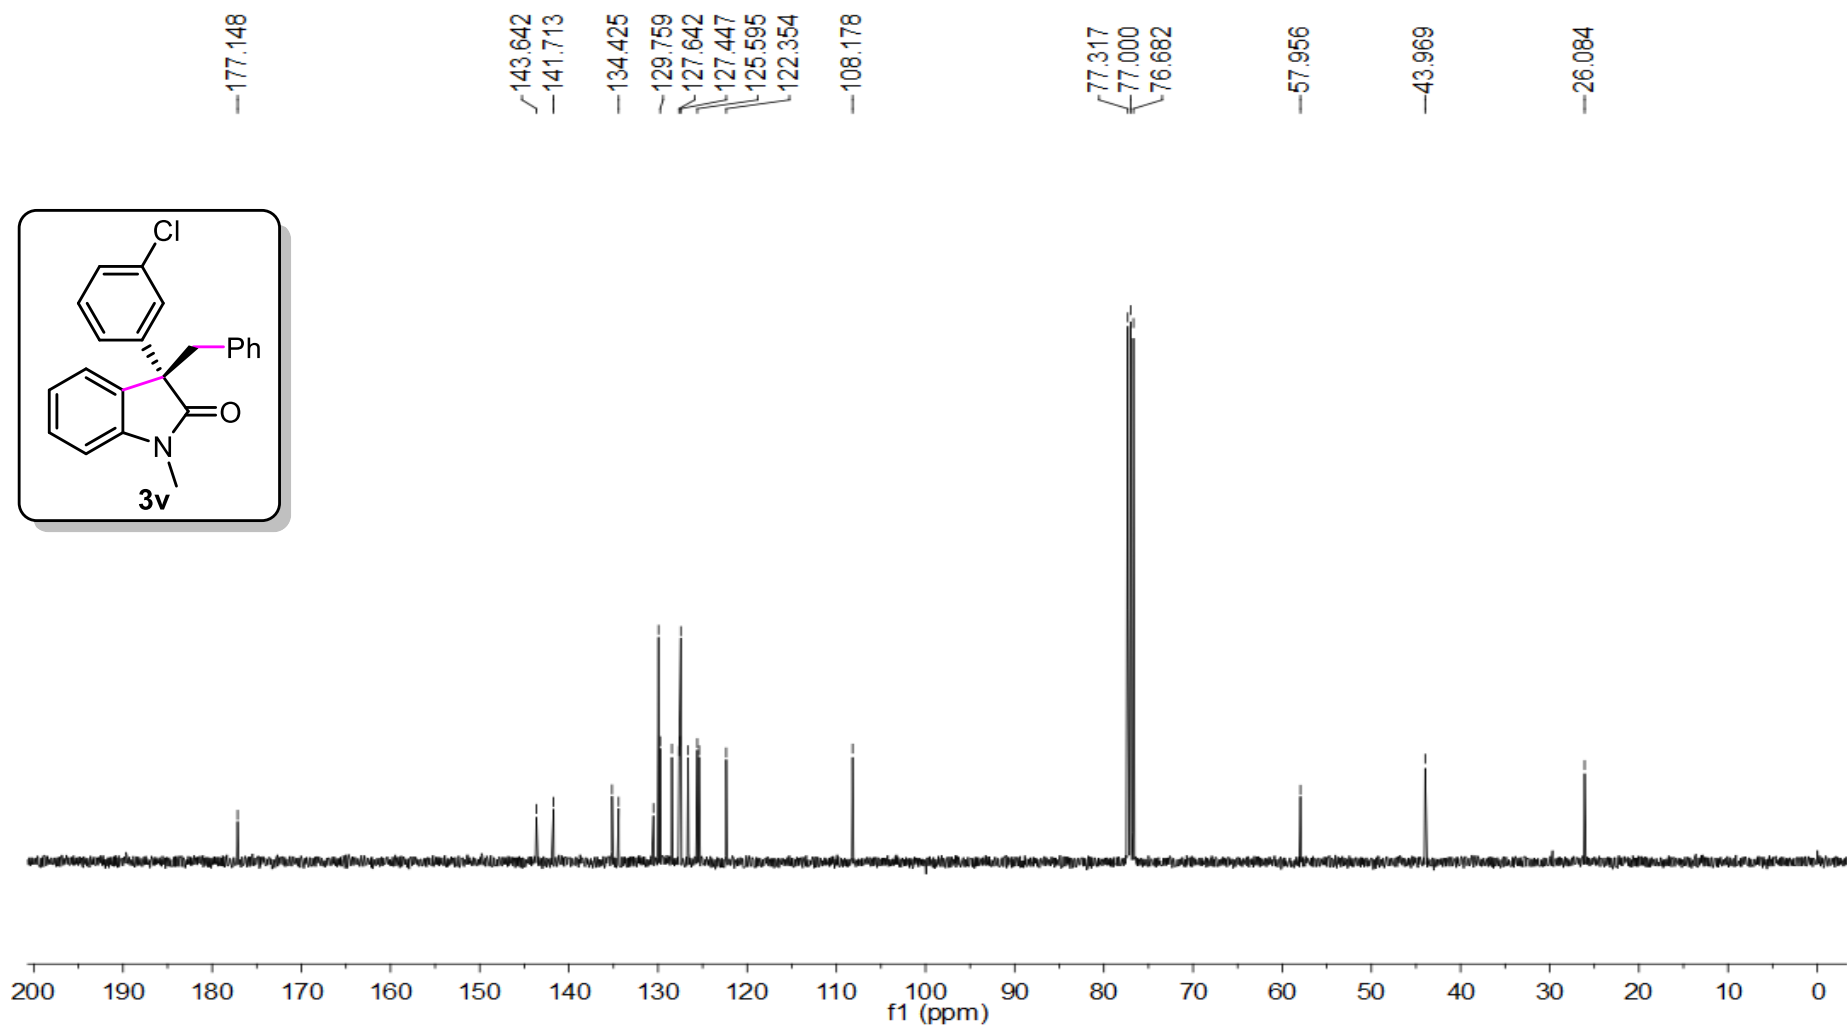

$^1\text{H}$  NMR (400 MHz,  $\text{CDCl}_3$ ) of compound **3w**

7.911  
7.825  
7.815  
7.804  
7.791  
7.478  
7.436  
7.113  
7.044  
6.850  
6.652  
6.646  
6.633  
6.631

3.835  
3.803  
3.589  
3.558

2.972

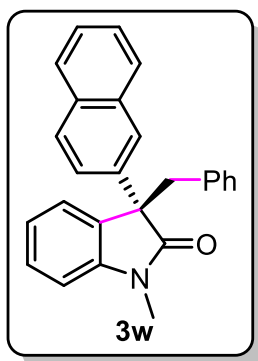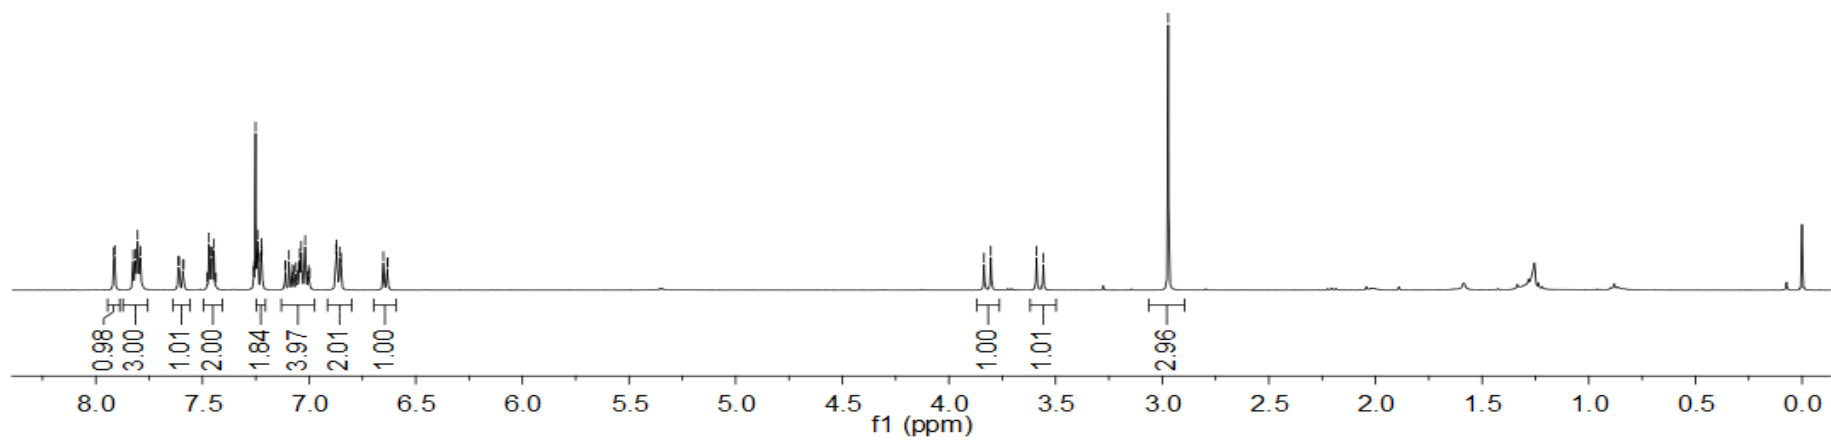

$^{13}\text{C}$  NMR (101 MHz,  $\text{CDCl}_3$ ) of compound **3w**

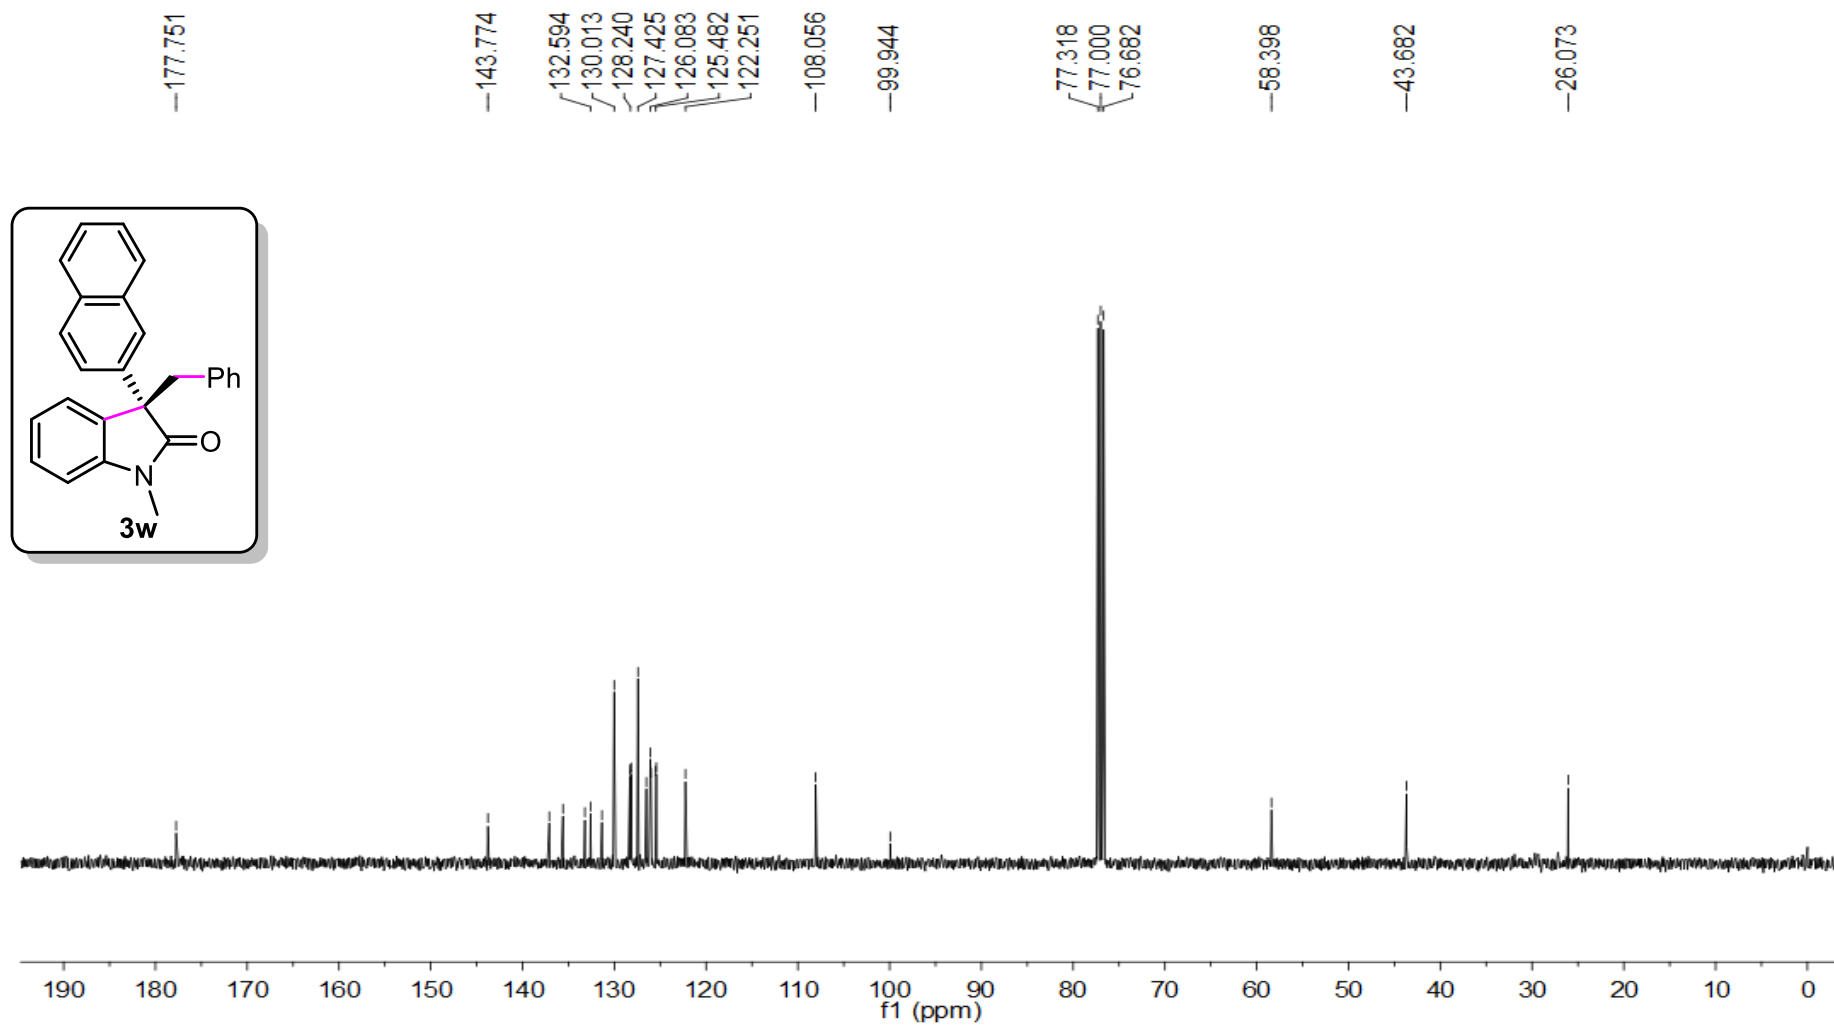

$^1\text{H}$  NMR (400 MHz,  $\text{CDCl}_3$ ) of compound **3x**

7.261  
7.203  
7.200  
7.184  
7.181  
7.165  
7.161  
7.138  
7.134  
7.119  
7.116  
7.075  
7.071  
7.063  
7.059  
7.051  
7.044  
7.032  
7.022  
7.015  
7.012  
6.856  
6.852  
6.839  
6.832  
6.624  
6.605

3.132  
3.100  
3.024  
2.991  
2.985

-1.474

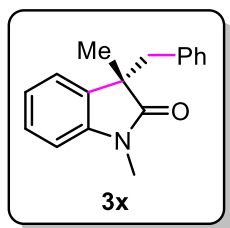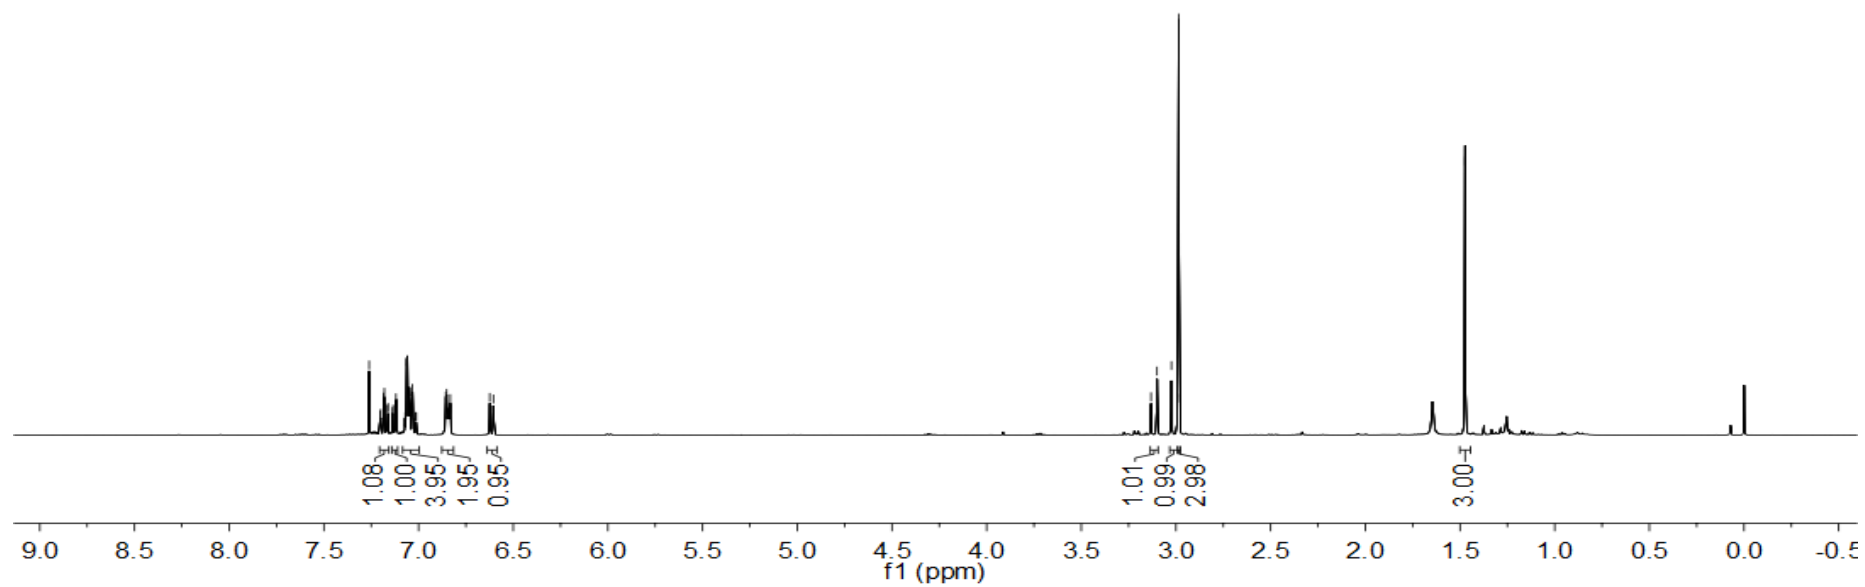

$^{13}\text{C}$  NMR (101 MHz,  $\text{CDCl}_3$ ) of compound **3x**

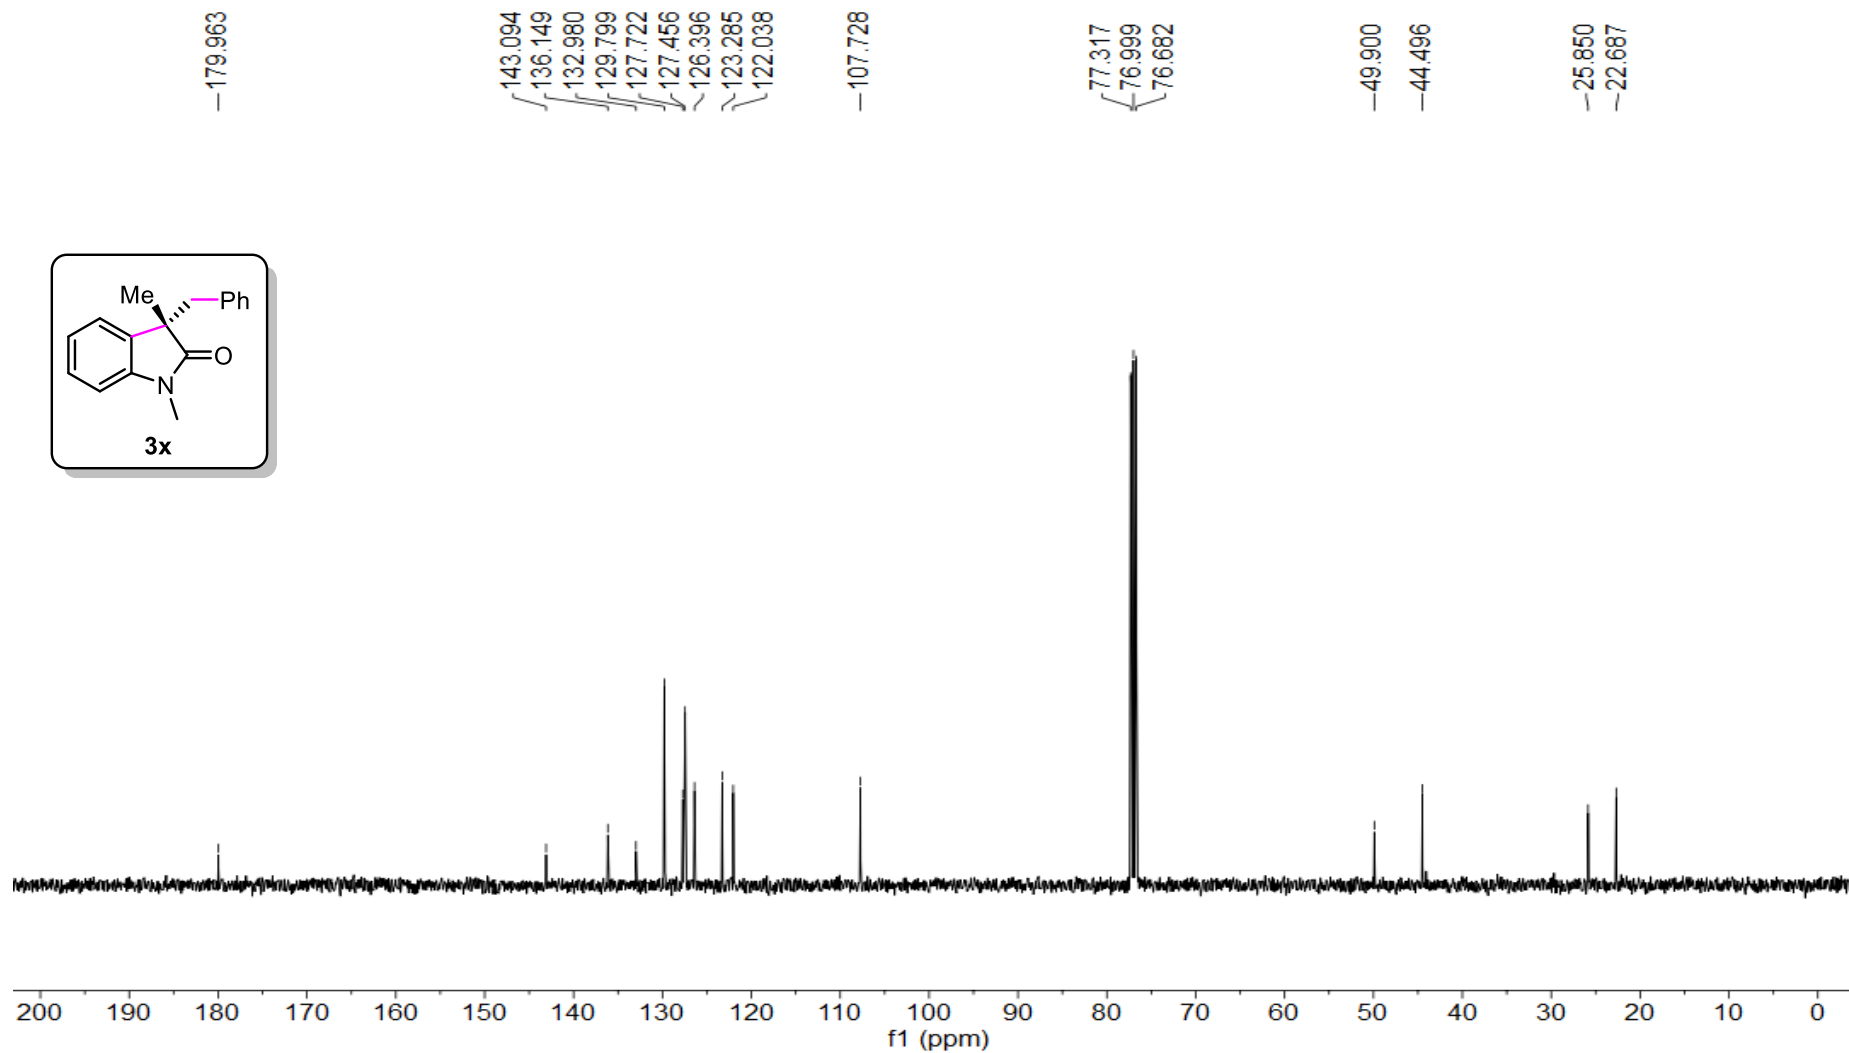



$^1\text{H}$  NMR (400 MHz,  $\text{CDCl}_3$ ) of compound **4a**

7.494  
7.475  
7.353  
7.335  
7.315  
7.287  
7.269  
7.251  
6.751  
6.732  
6.547  
6.526

3.772  
3.654  
3.622  
3.430  
3.398  
-2.940  
-2.190

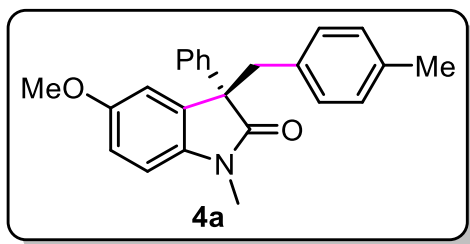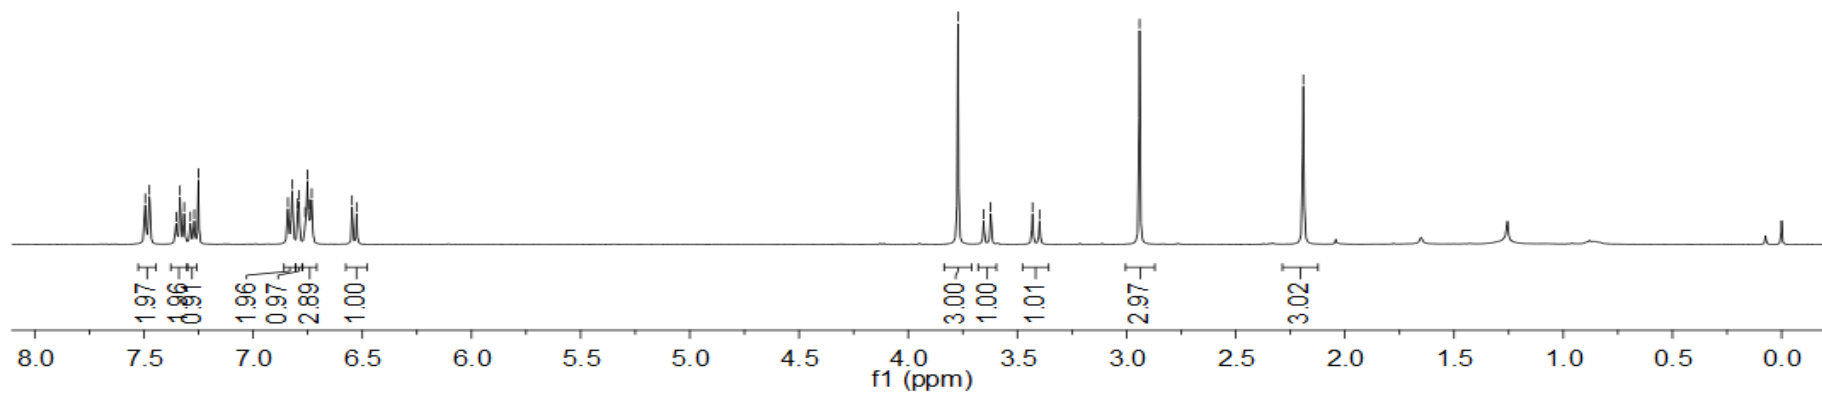

$^{13}\text{C}$  NMR (101 MHz,  $\text{CDCl}_3$ ) of compound **4a**

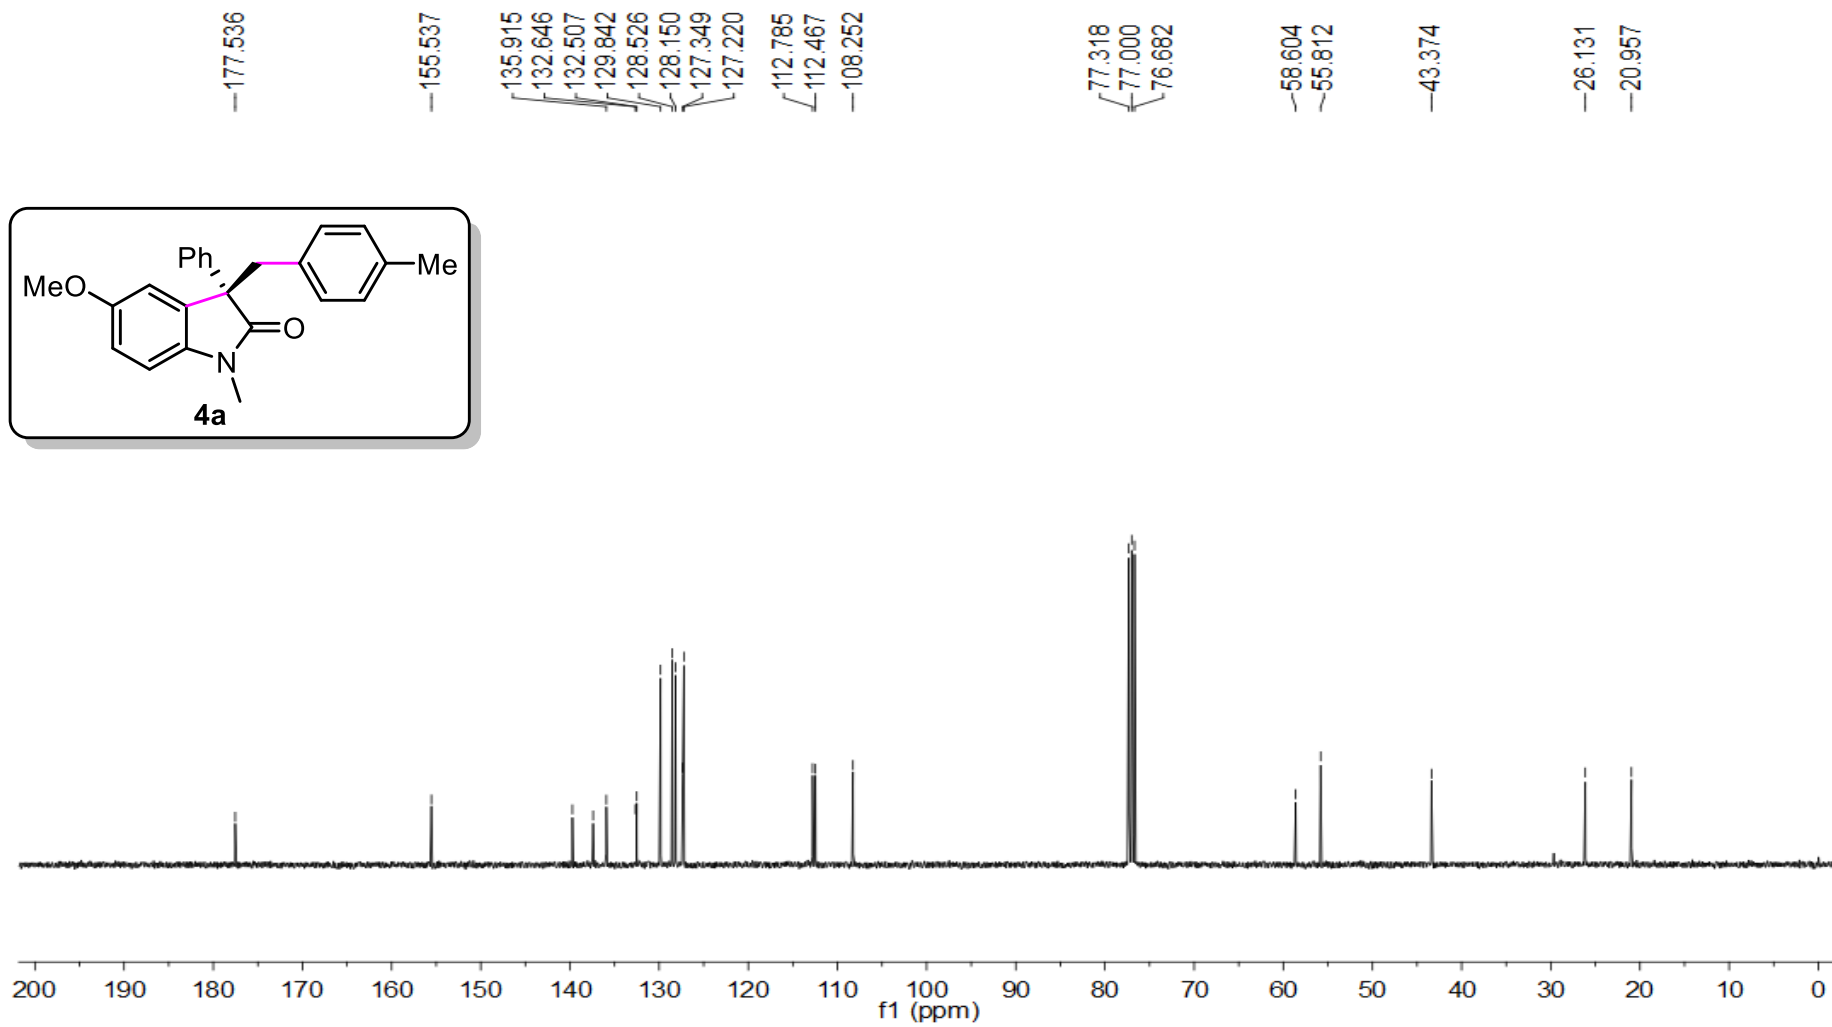

$^1\text{H}$  NMR (400 MHz,  $\text{CDCl}_3$ ) of compound **4b**

7.500  
7.480  
7.357  
7.339  
7.320  
7.292  
7.274  
6.768  
6.746  
6.739  
6.544  
6.524

3.767  
3.638  
3.605  
3.456  
3.424  
-2.931  
2.521  
2.502  
2.483  
2.464

1.255  
1.136  
1.117  
1.098

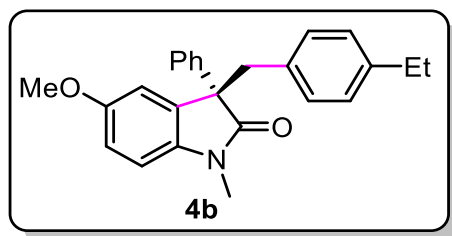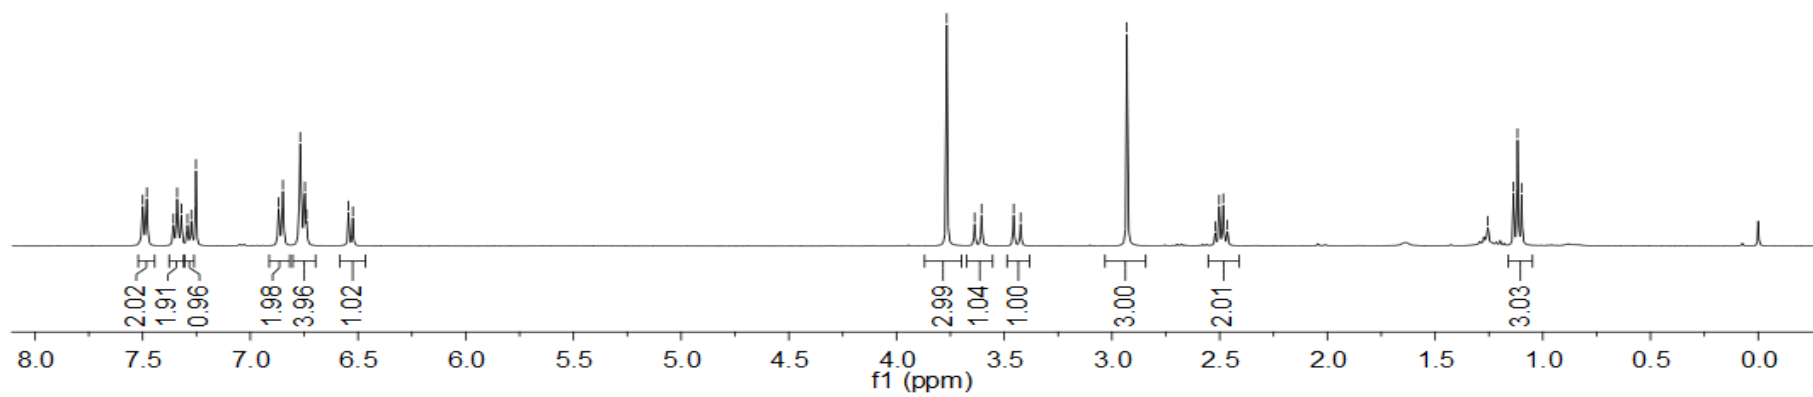

$^{13}\text{C}$  NMR (101 MHz,  $\text{CDCl}_3$ ) of compound **4b**

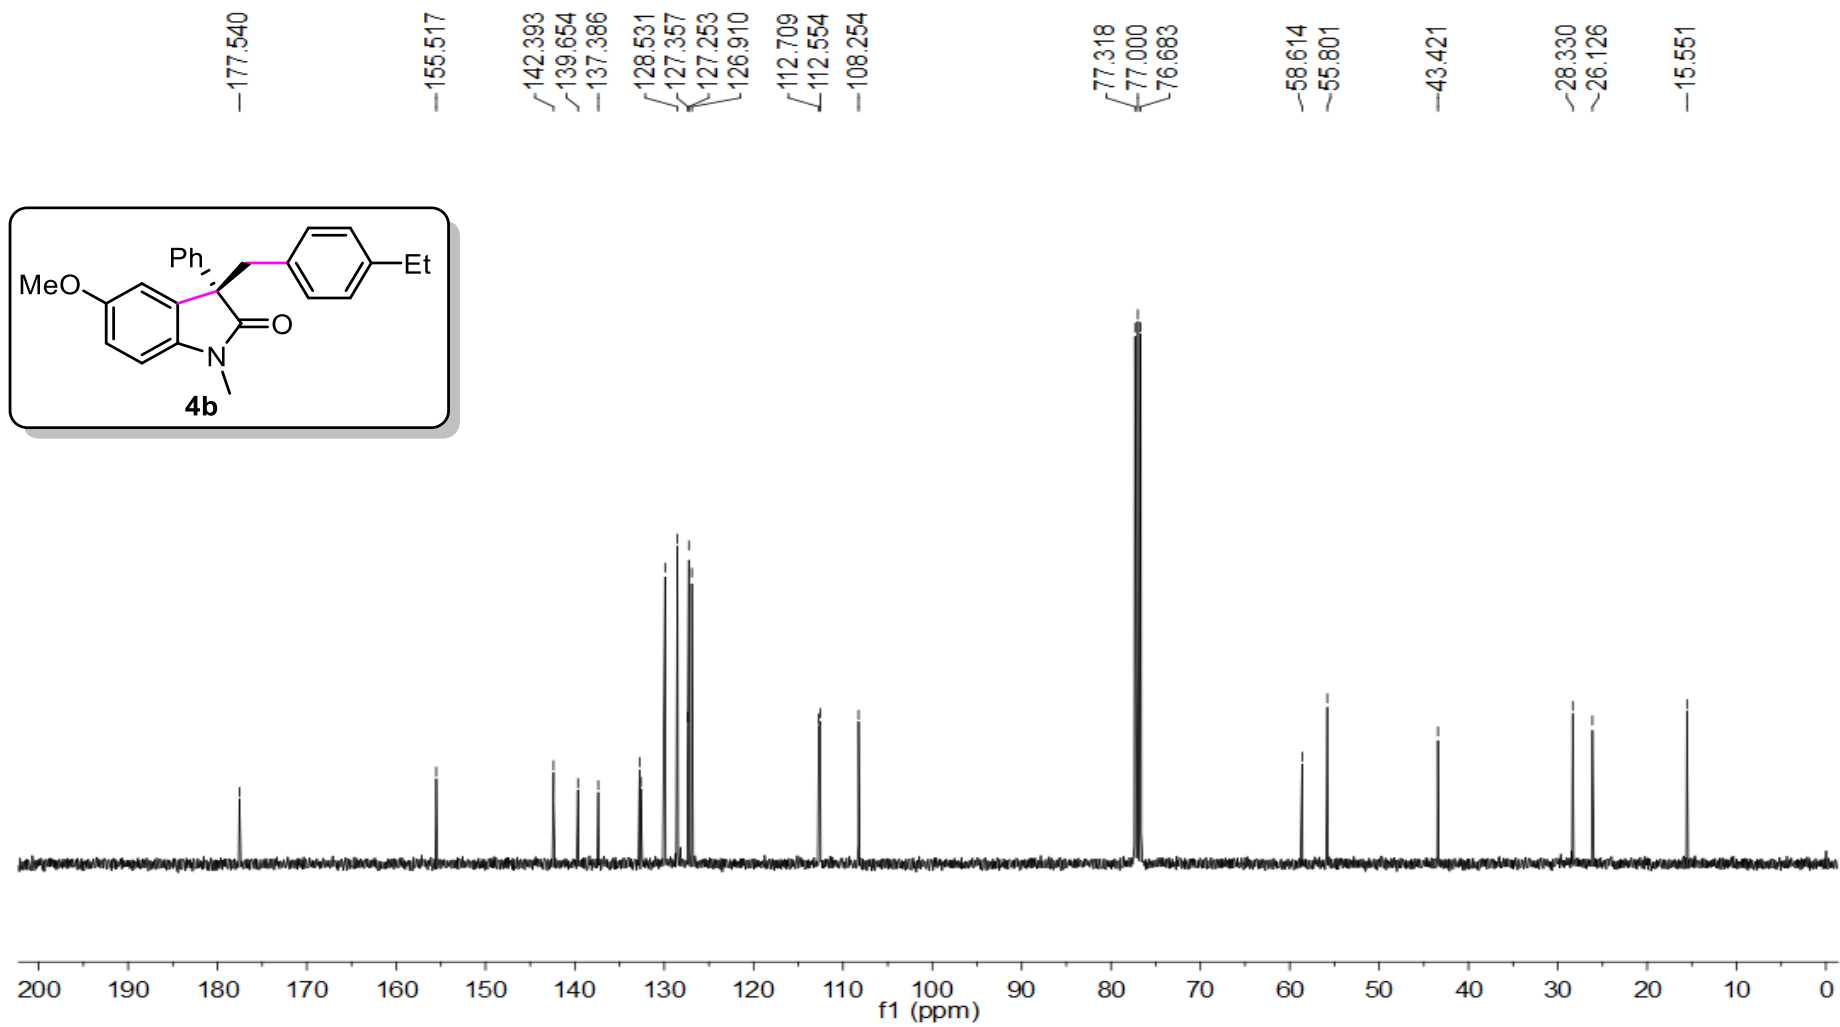

$^1\text{H}$  NMR (400 MHz,  $\text{CDCl}_3$ ) of compound **4c**

7.505  
7.501  
7.483  
7.358  
7.353  
7.340  
7.337  
7.321  
7.296  
7.293  
7.290  
7.275  
7.252  
6.897  
6.877  
6.770  
6.760  
6.750  
6.743  
6.741  
6.538  
6.517

3.756  
3.604  
3.572  
3.476  
3.444  
2.914  
2.786  
2.769  
2.751  
2.734  
2.717

1.142  
1.138  
1.125  
1.121

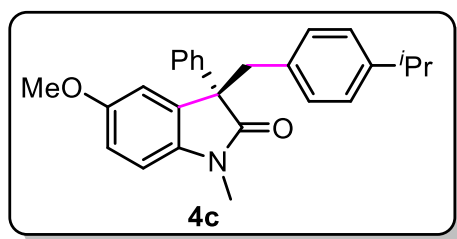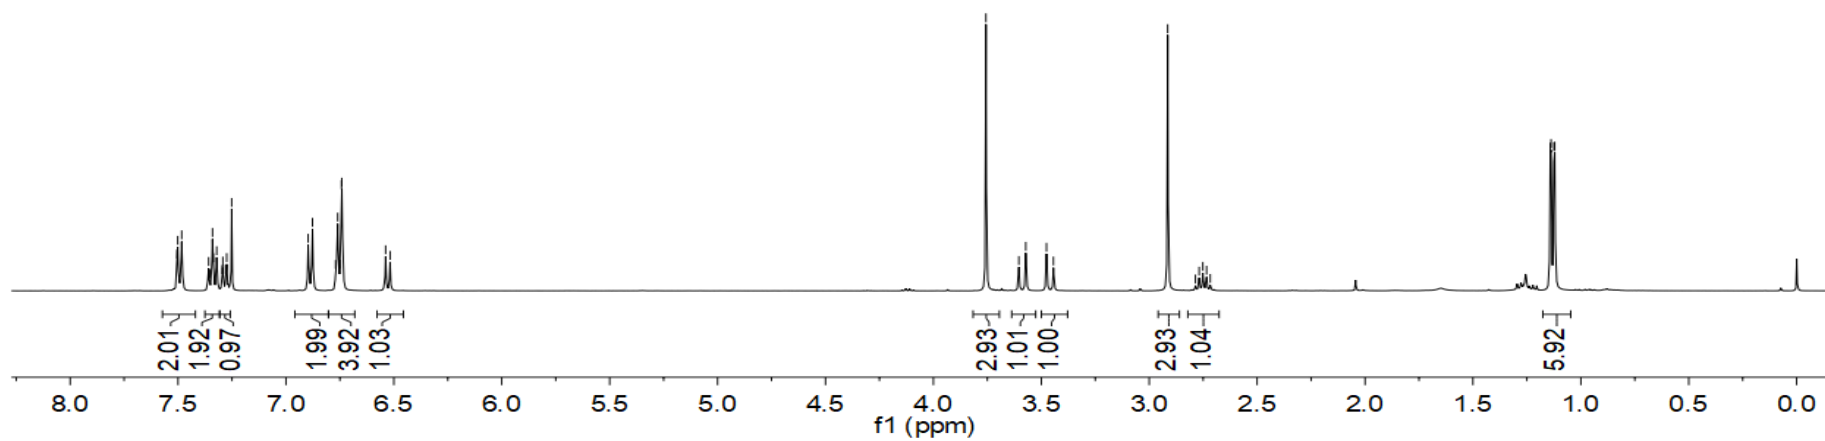

$^{13}\text{C}$  NMR (101 MHz,  $\text{CDCl}_3$ ) of compound **4c**

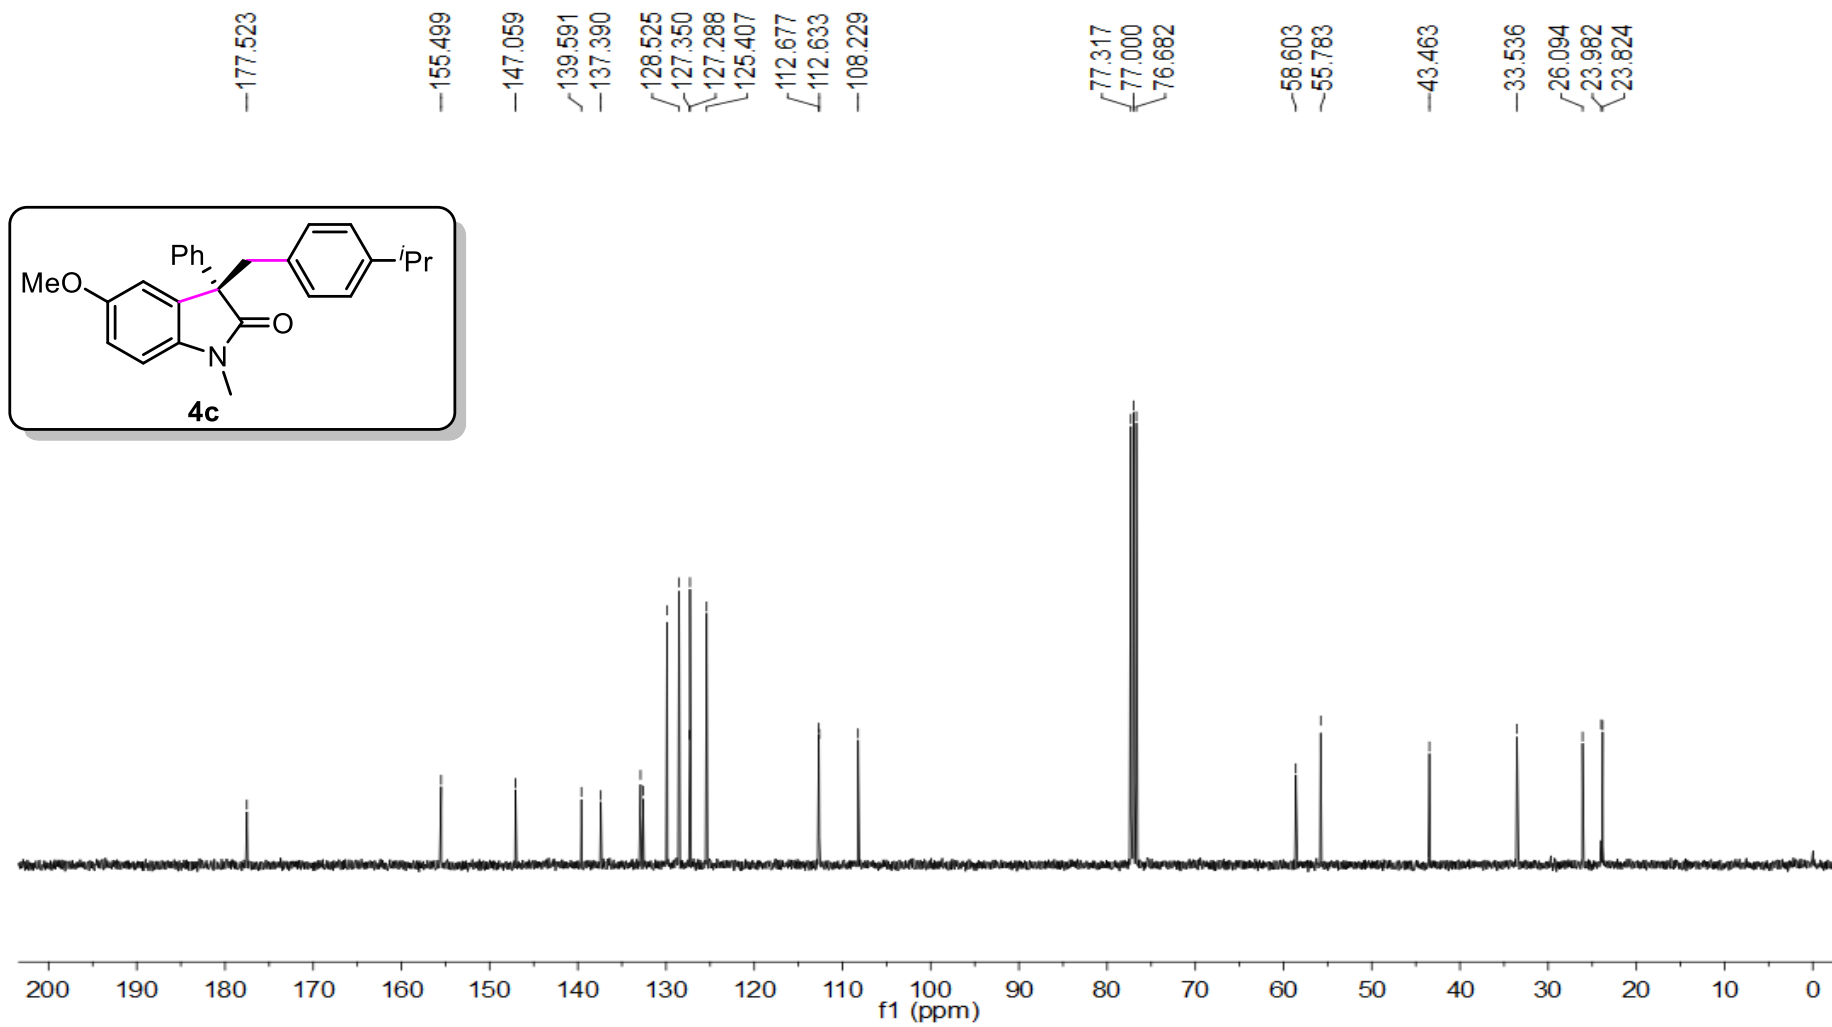

<sup>1</sup>H NMR (400 MHz, CDCl<sub>3</sub>) of compound **4d**

7.486  
7.341  
7.322  
7.293  
7.275  
7.251  
— 7.036  
— 6.721  
6.540  
6.519

— 3.749  
3.551  
3.495  
3.463  
— 2.909

— 1.203

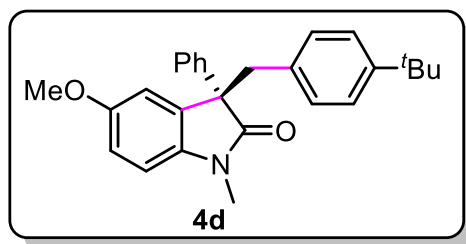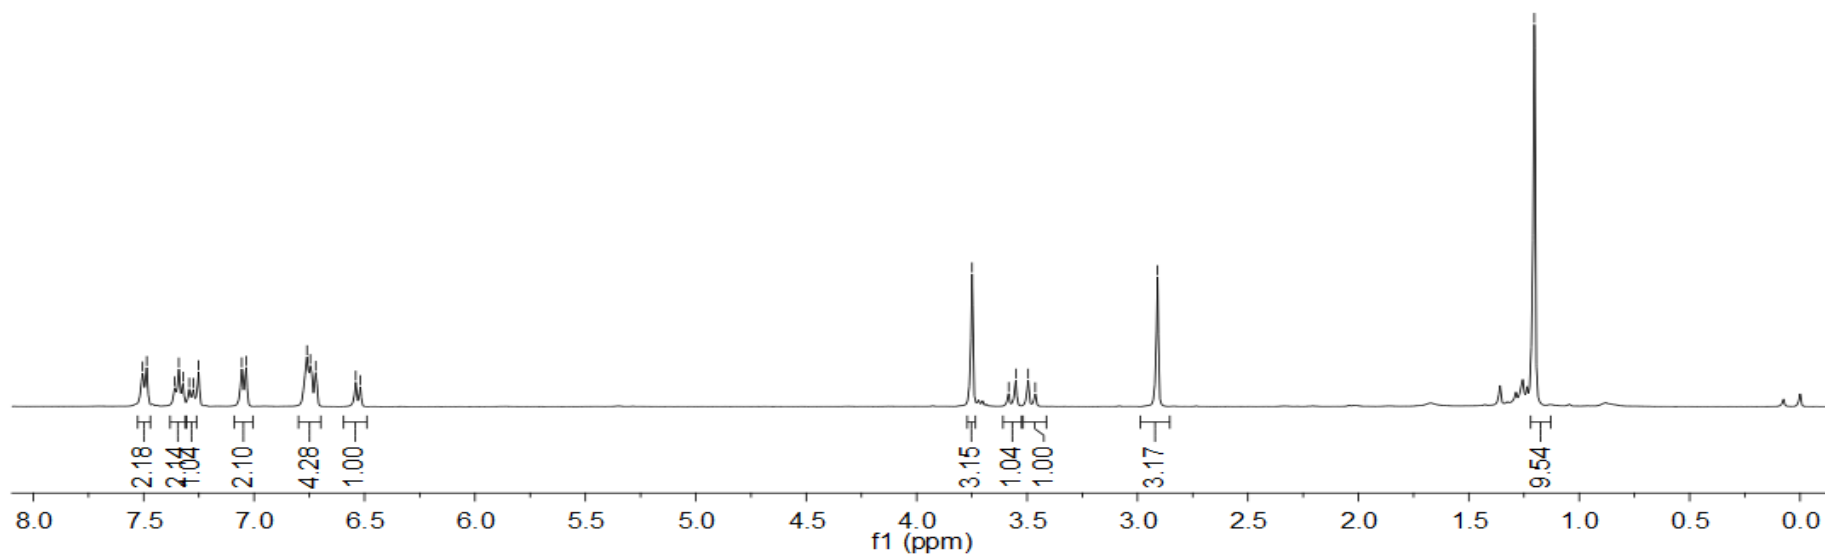

$^{13}\text{C}$  NMR (101 MHz,  $\text{CDCl}_3$ ) of compound **4d**

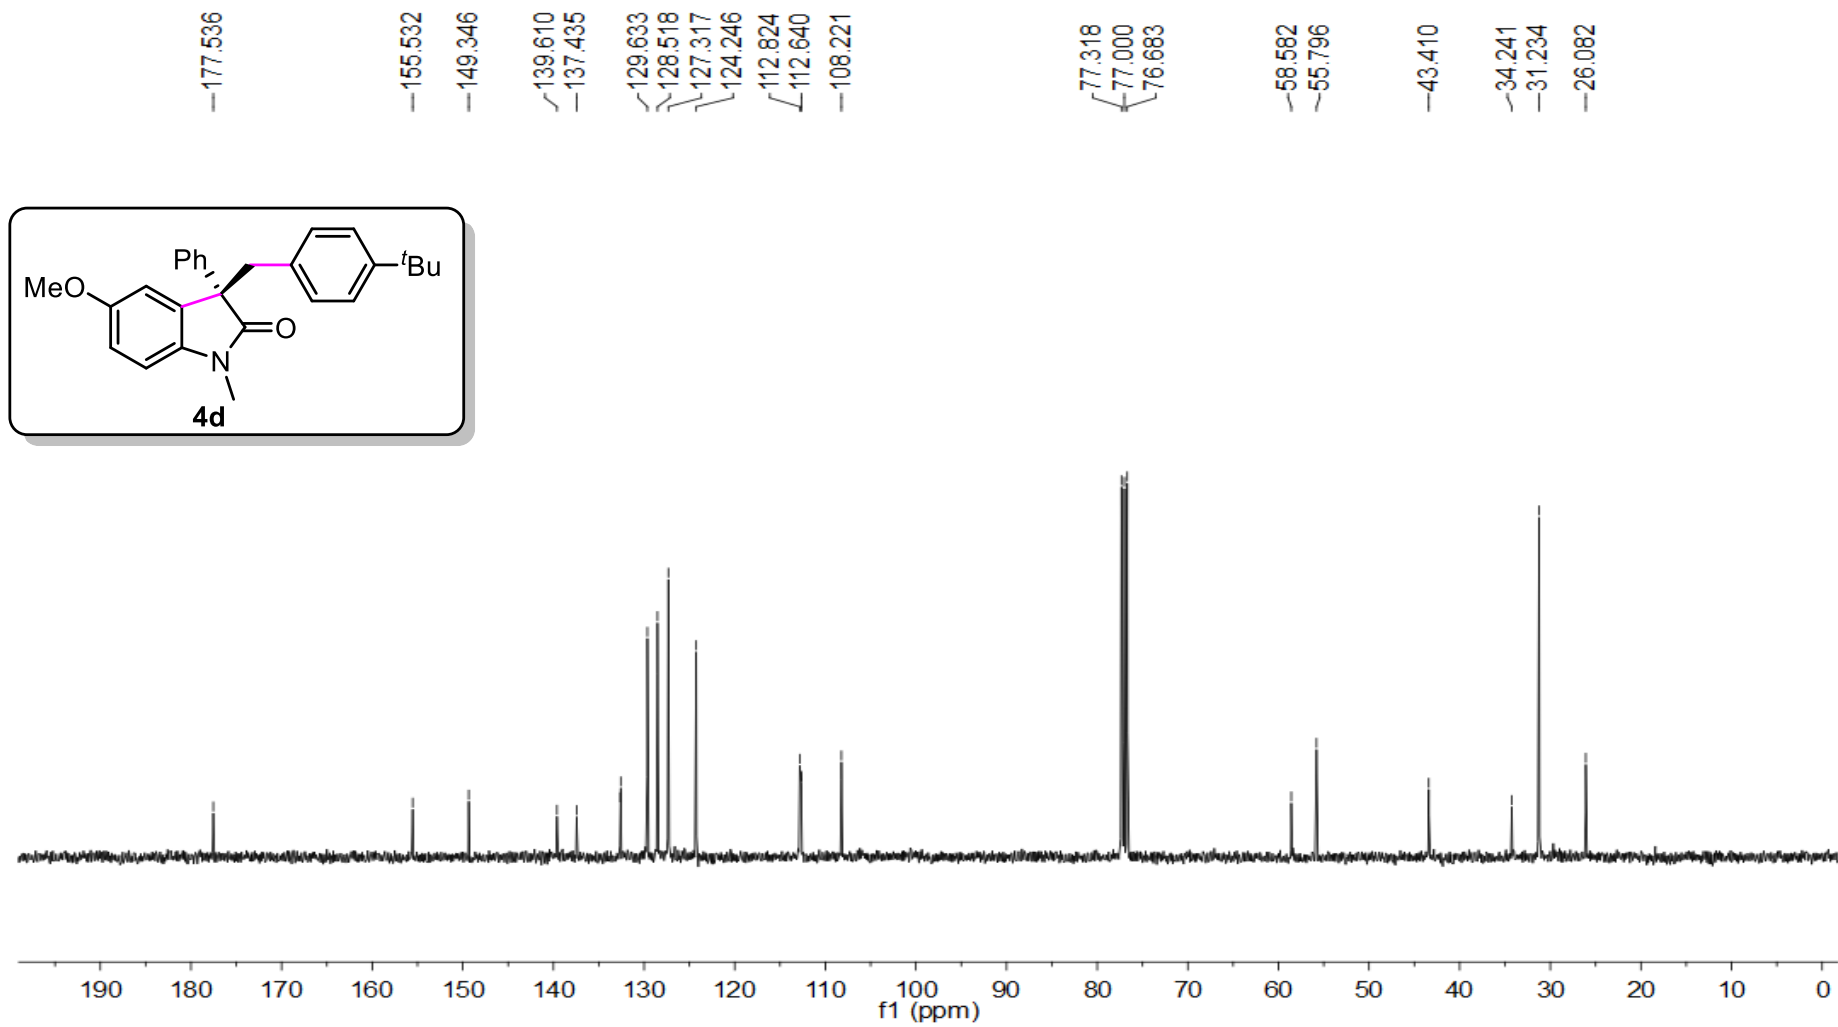



$^1\text{H}$  NMR (400 MHz,  $\text{CDCl}_3$ ) of compound **4e**

7.479  
7.375  
7.332  
7.295  
7.284  
7.240  
6.938  
6.753  
6.732  
6.533  
6.512

3.772  
3.734  
3.702  
3.506  
3.474  
-2.937

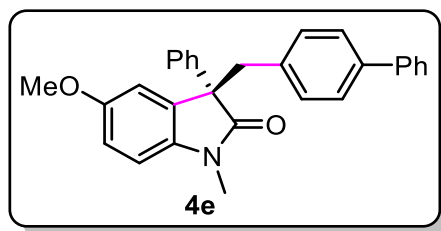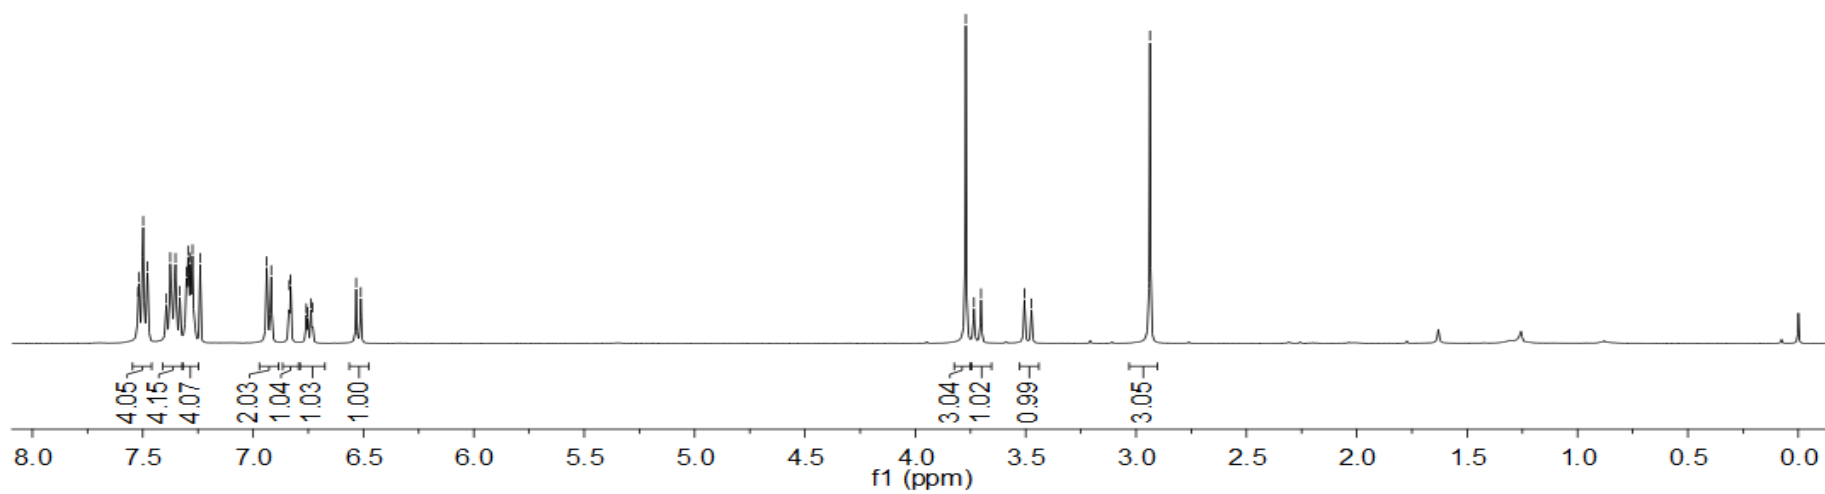

$^{13}\text{C}$  NMR (101 MHz,  $\text{CDCl}_3$ ) of compound **4e**

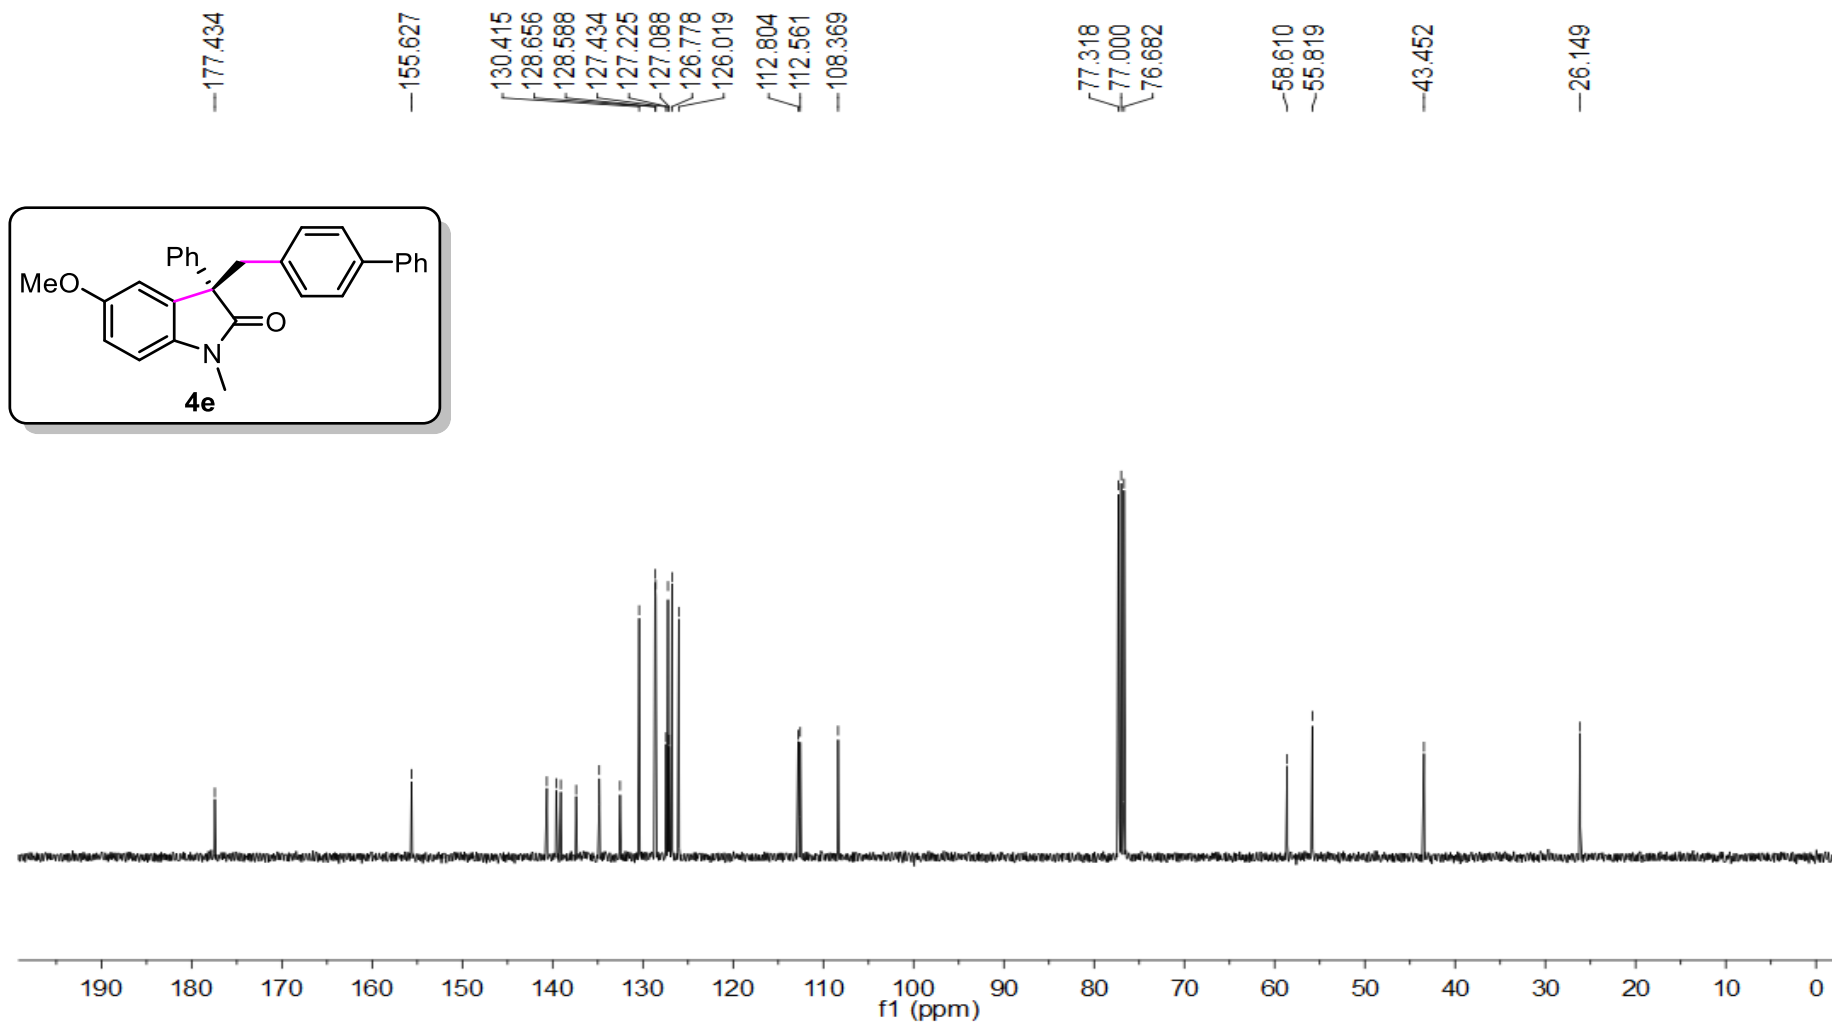

$^1\text{H}$  NMR (400 MHz,  $\text{CDCl}_3$ ) of compound **4f**

7.490  
7.472  
7.354  
7.336  
7.317  
7.289  
7.271  
6.854  
6.764  
6.734  
6.580  
6.559  
6.547  
6.526

3.778  
3.685  
3.647  
3.614  
3.406  
3.373  
-2.938

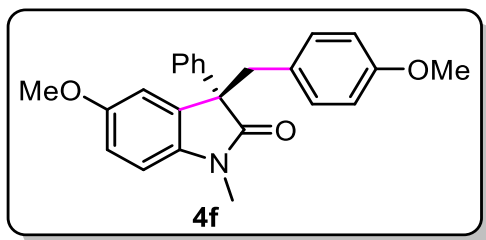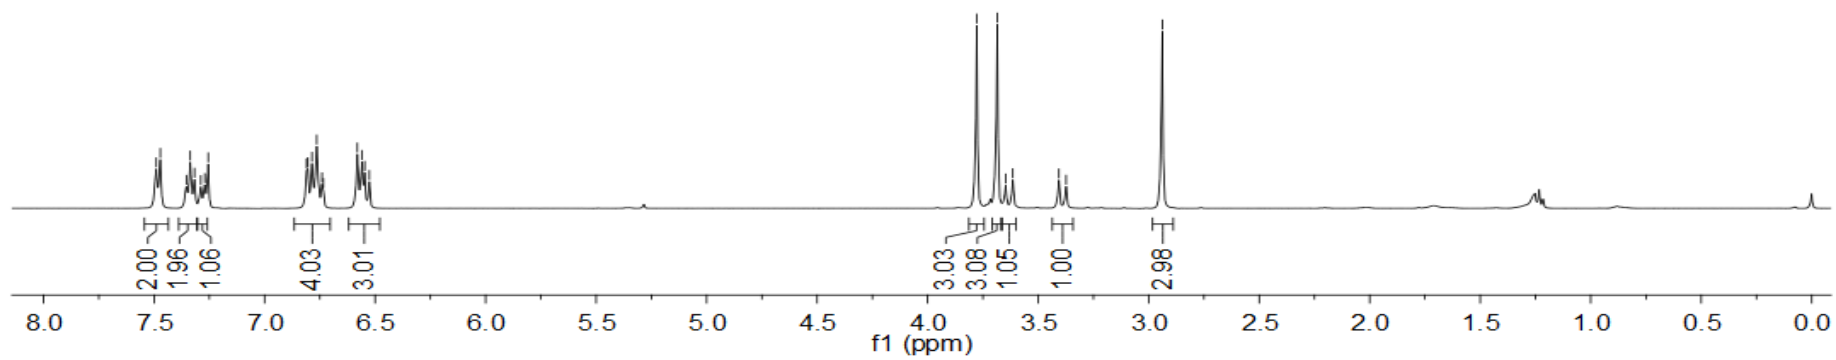

$^{13}\text{C}$  NMR (101 MHz,  $\text{CDCl}_3$ ) of compound **4f**

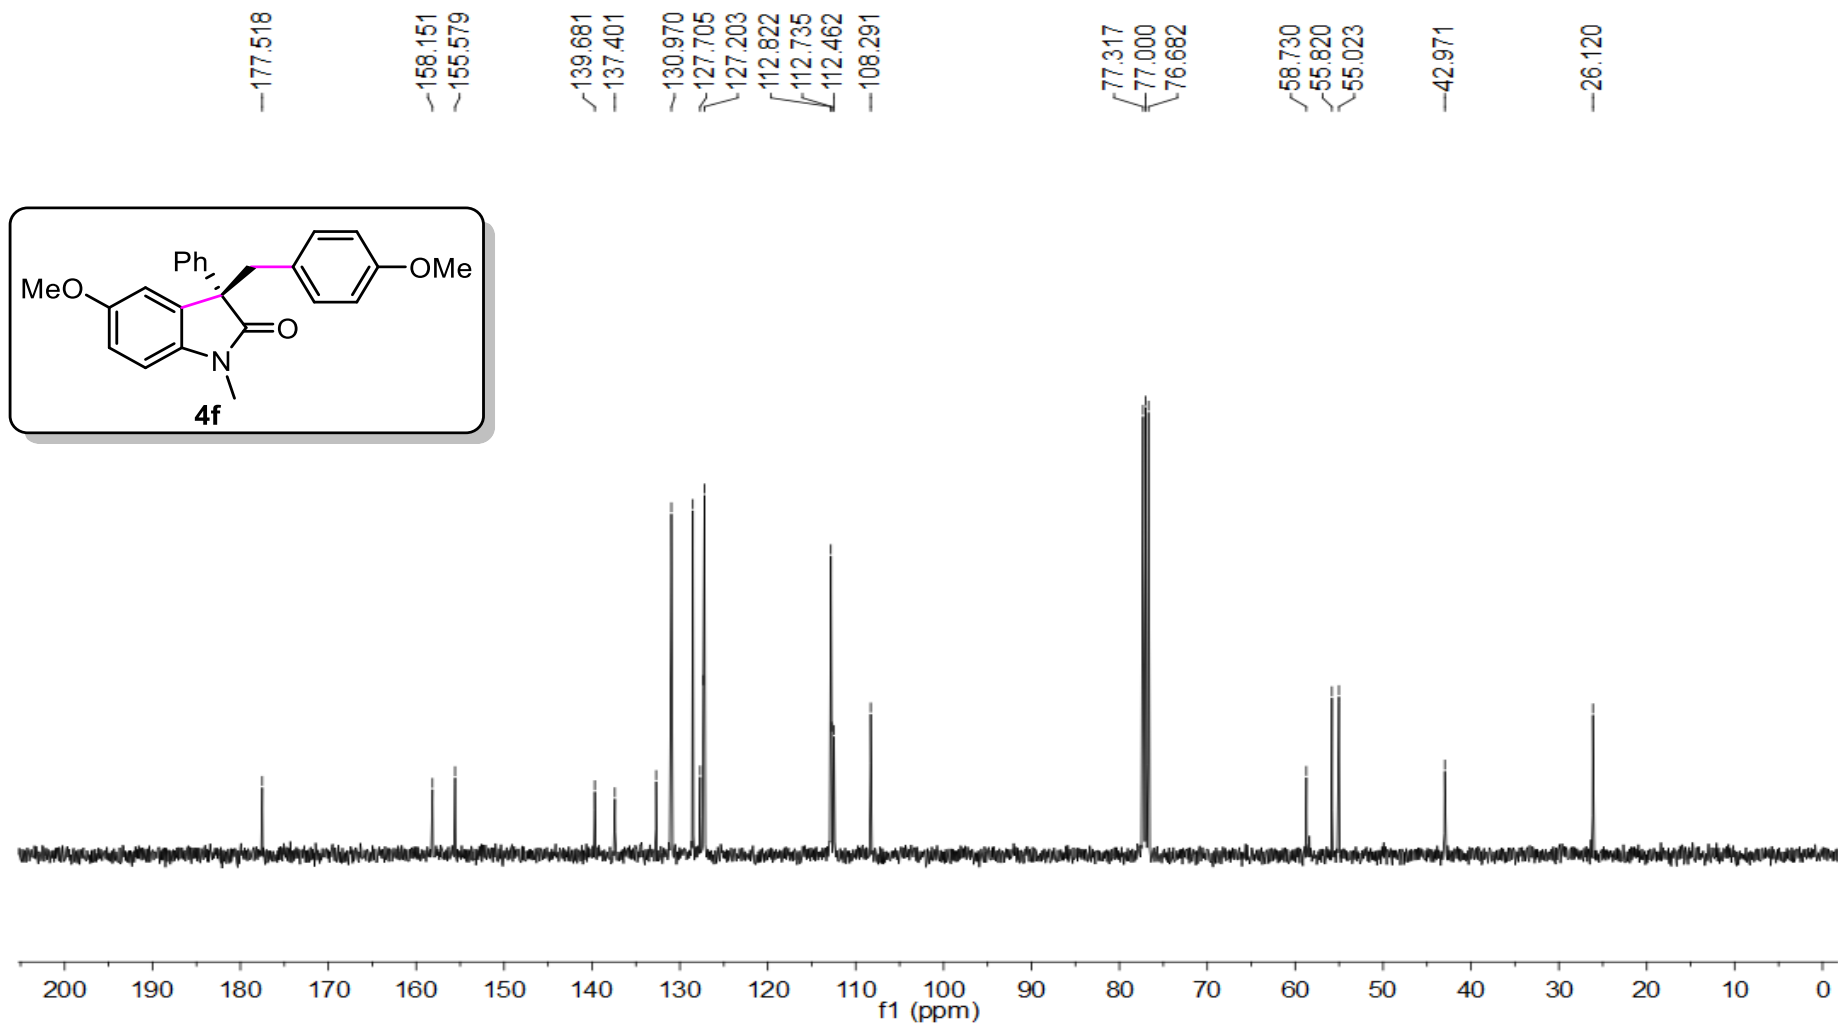

$^1\text{H}$  NMR (400 MHz,  $\text{CDCl}_3$ ) of compound **4g**

7.489  
7.471  
7.356  
7.339  
7.320  
7.291  
6.750  
6.738  
6.571  
6.549  
6.523

3.927  
3.910  
3.893  
3.876  
3.782  
3.645  
3.613  
3.399  
3.366  
-2.940

1.360  
1.343  
1.325

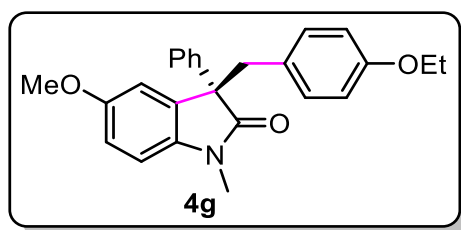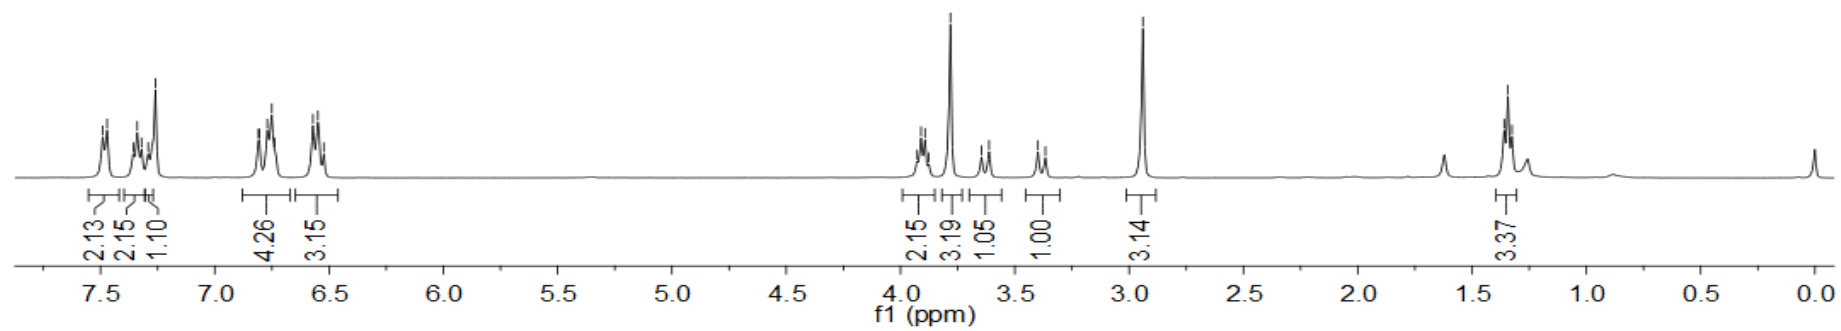

$^{13}\text{C}$  NMR (101 MHz,  $\text{CDCl}_3$ ) of compound **4g**

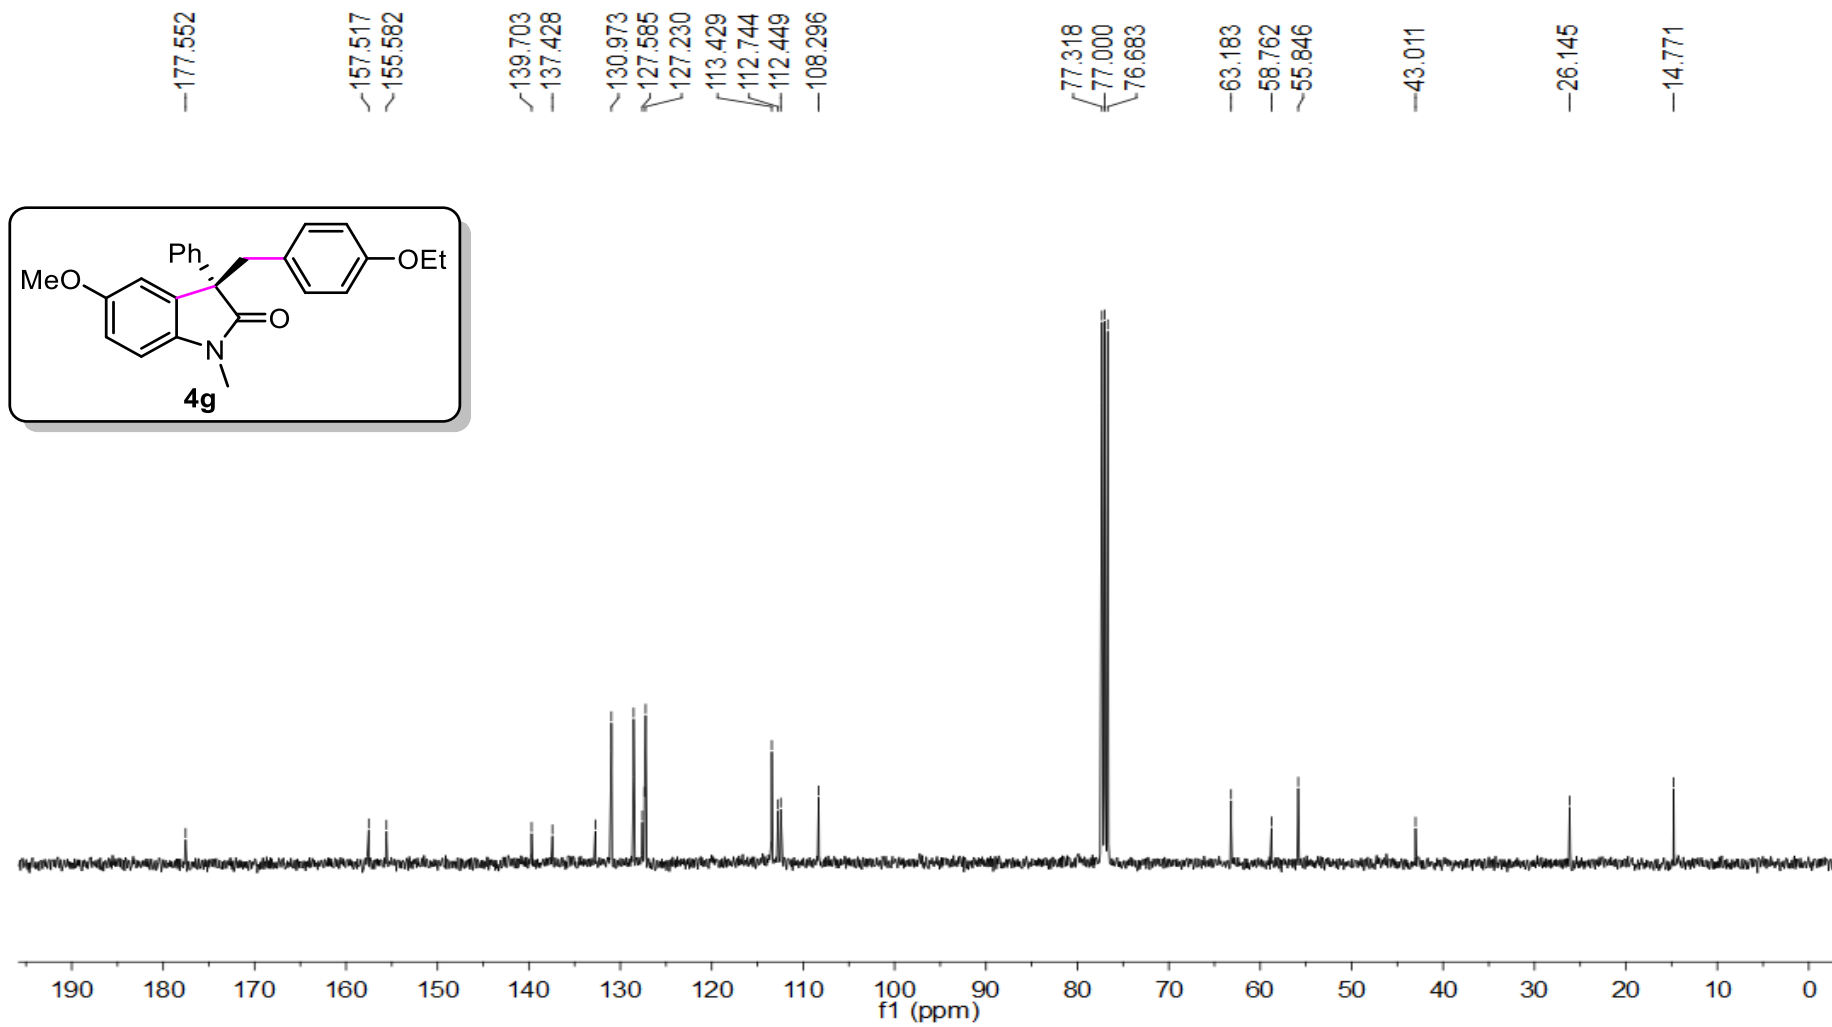

<sup>1</sup>H NMR (400 MHz, CDCl<sub>3</sub>) of compound **4h**

7.361  
7.355  
7.337  
7.318  
7.290  
7.272  
7.248  
6.804  
6.799  
6.779  
6.758  
6.736  
6.653  
6.632  
6.532  
6.511

—4.938

3.769  
3.644  
3.611  
3.402  
3.369

—2.913

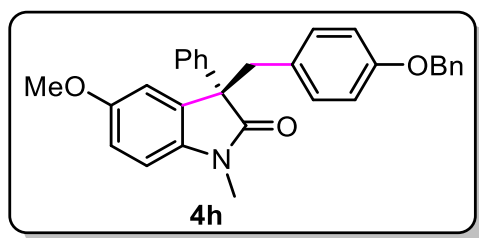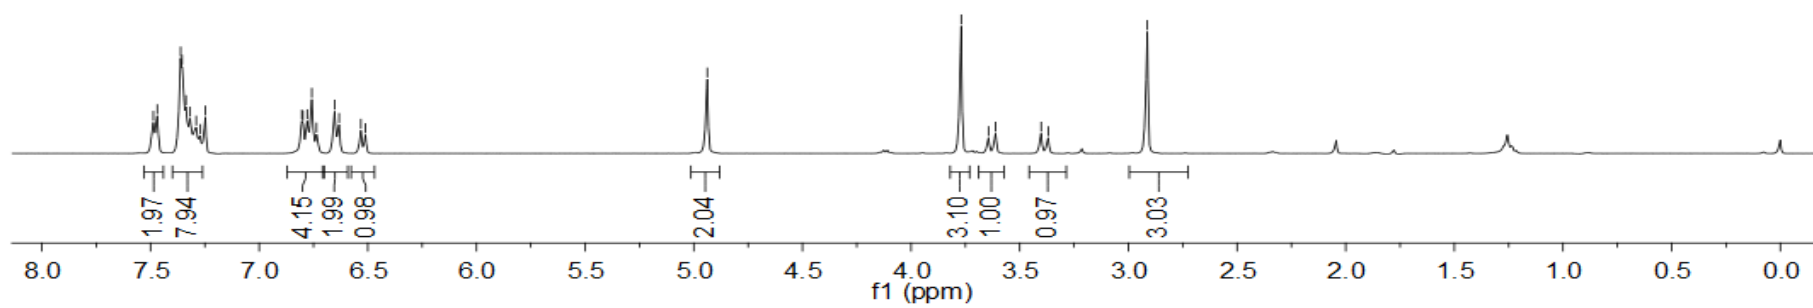

$^{13}\text{C}$  NMR (101 MHz,  $\text{CDCl}_3$ ) of compound **4h**

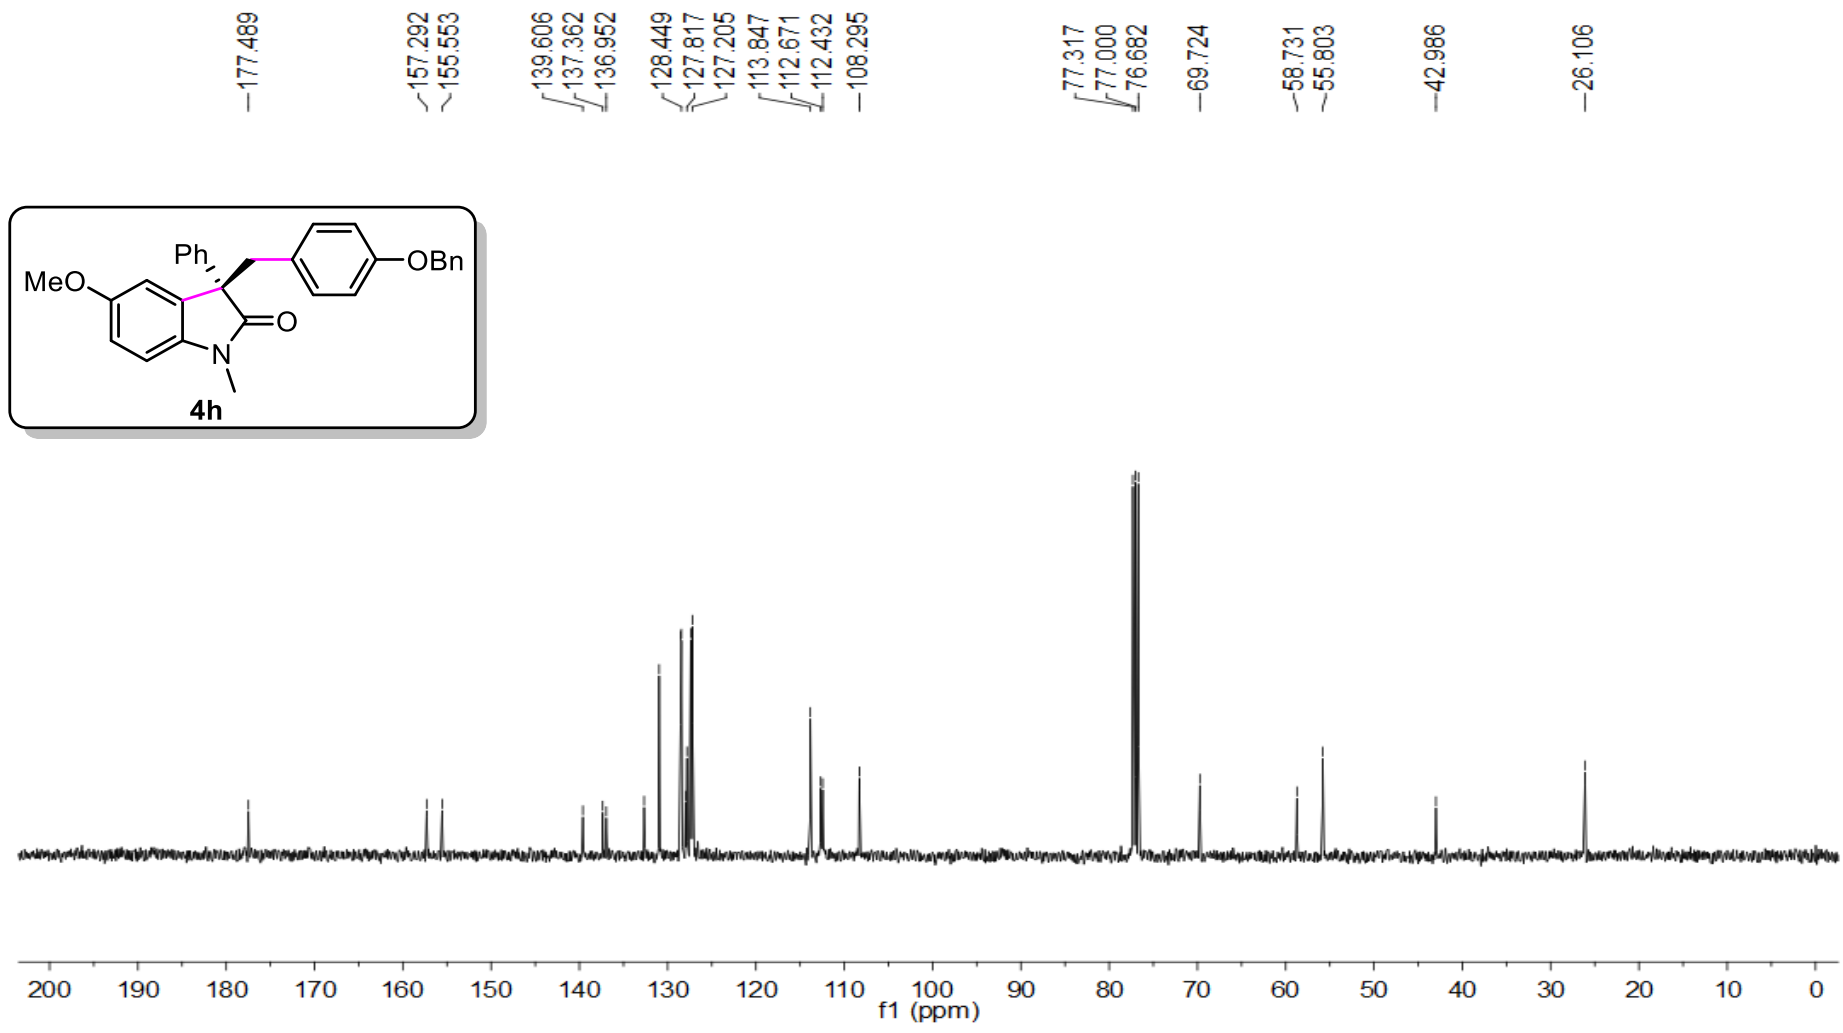



$^1\text{H}$  NMR (400 MHz,  $\text{CDCl}_3$ ) of compound **4i**

7.340  
7.321  
7.294  
7.282  
7.277  
7.258  
7.252  
6.813  
6.745  
6.692  
6.548  
6.527

3.778  
3.693  
3.660  
3.408  
3.376  
-2.930

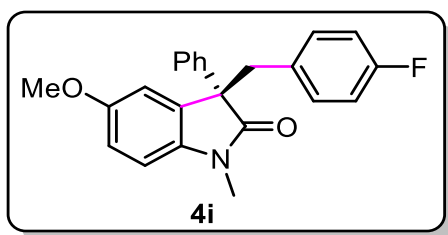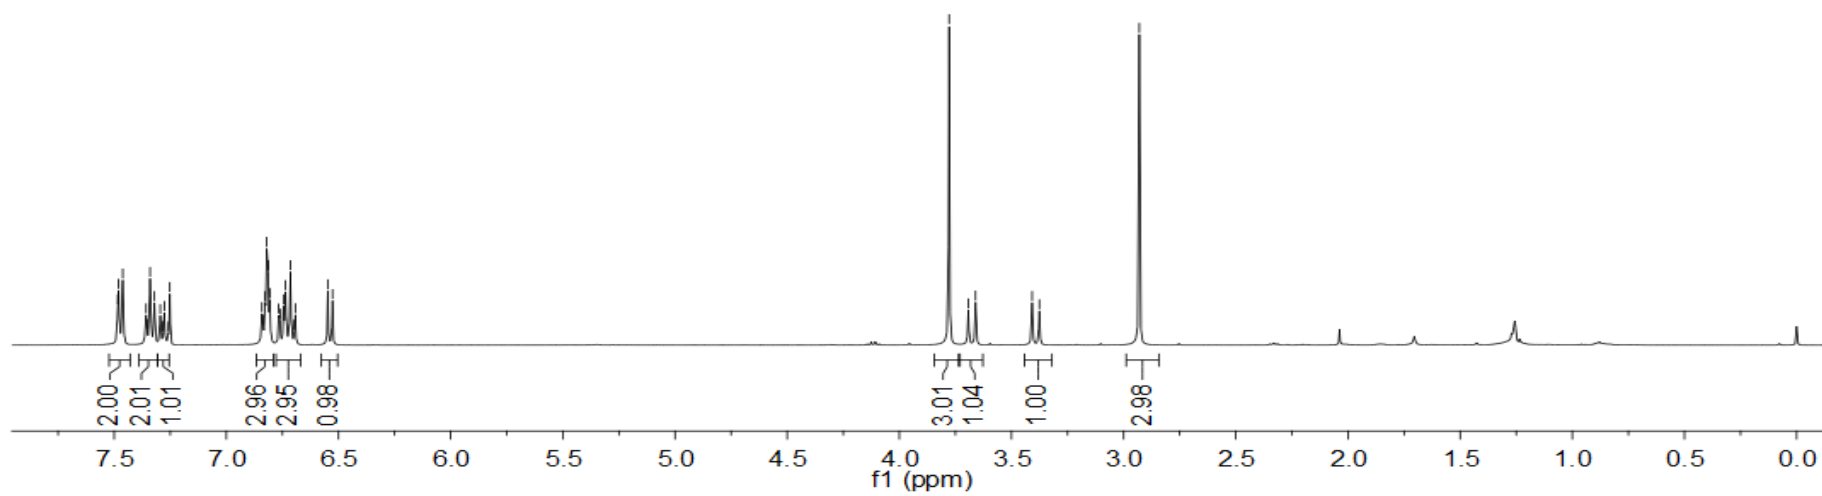

$^{13}\text{C}$  NMR (101 MHz,  $\text{CDCl}_3$ ) of compound **4i**

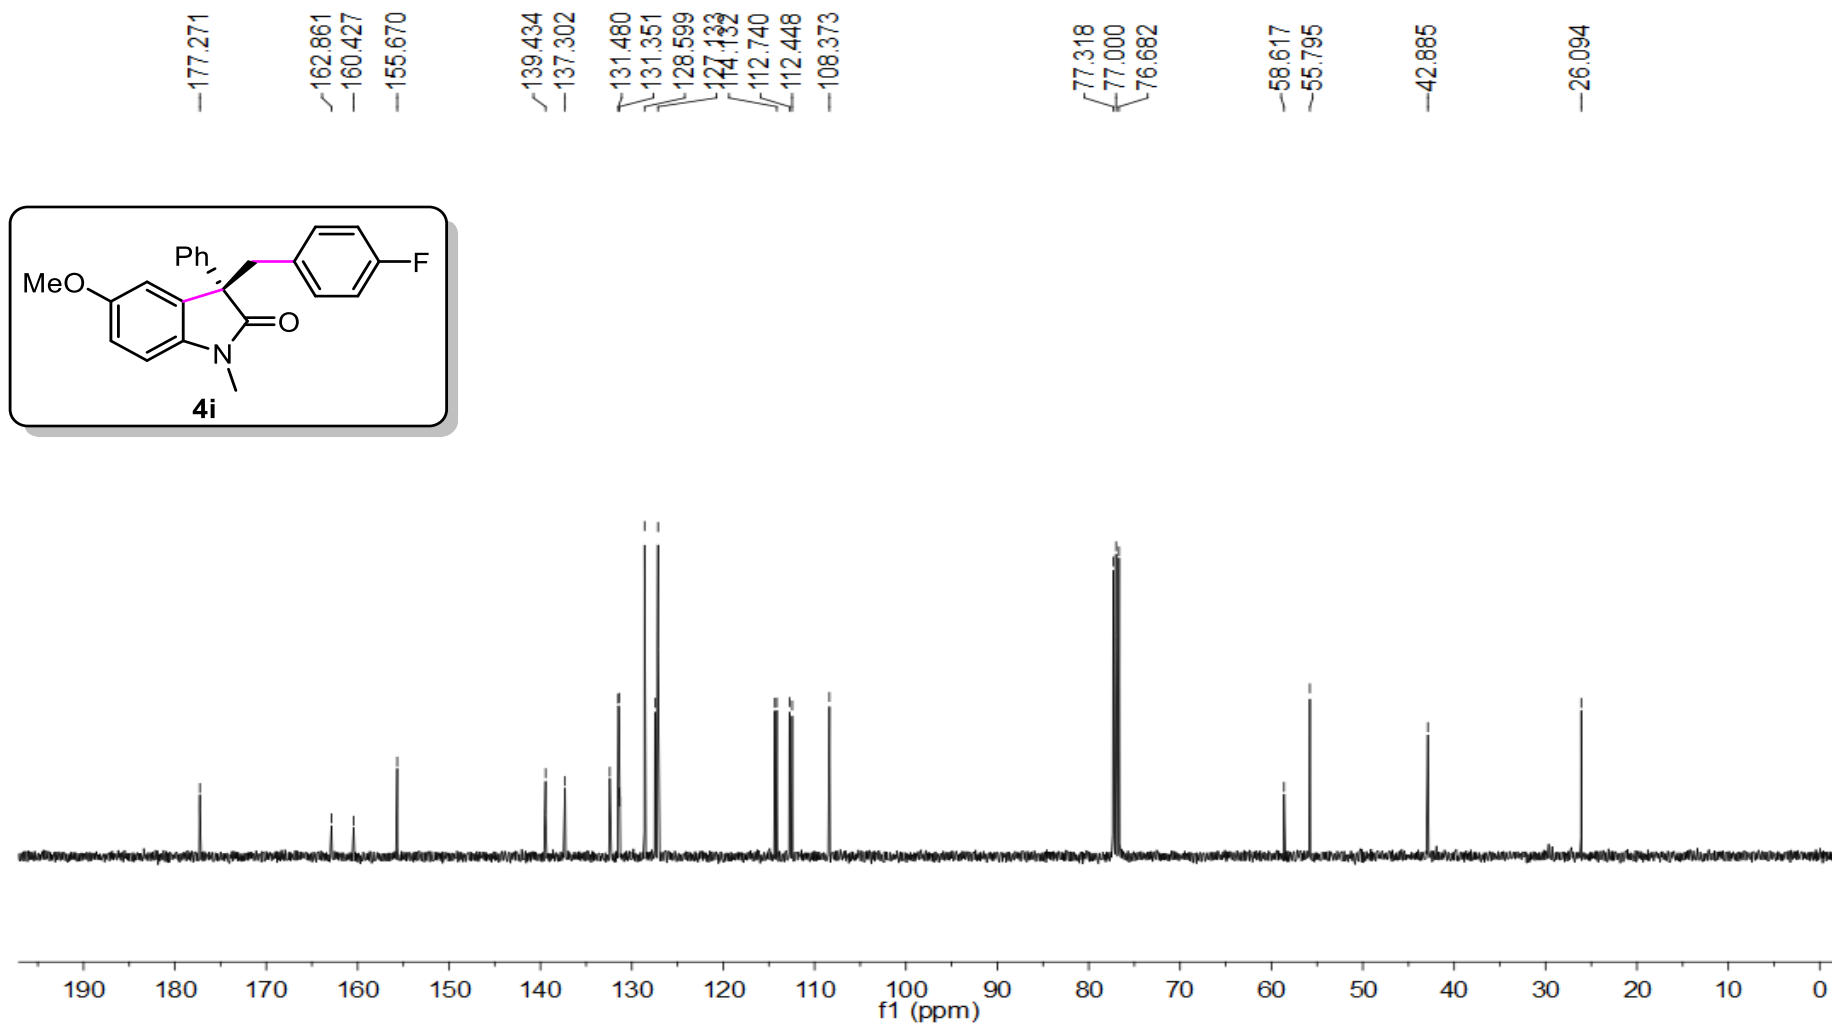

$^1\text{H}$  NMR (400 MHz,  $\text{CDCl}_3$ ) of compound **4j**

7.340  
7.321  
7.297  
7.279  
7.255  
-6.991  
-6.745  
-6.564  
-6.543

3.782  
3.691  
3.659  
-3.402  
-3.370  
-2.944

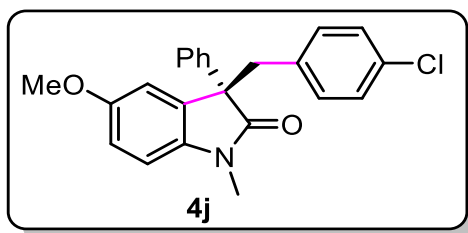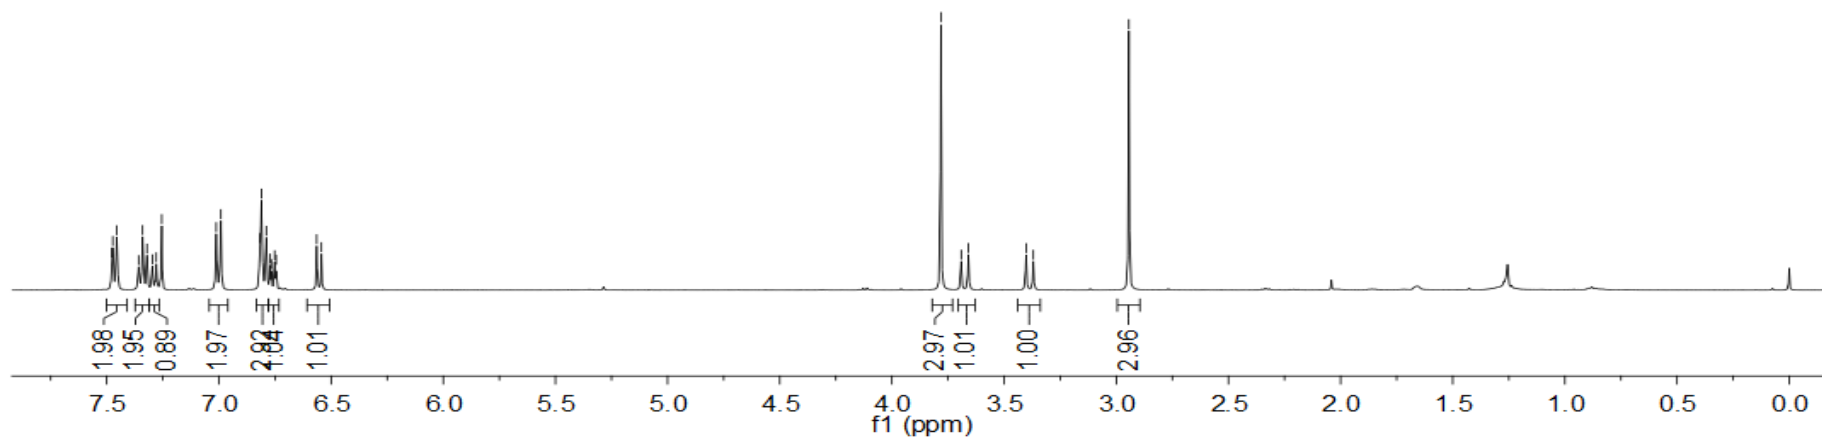

$^{13}\text{C}$  NMR (101 MHz,  $\text{CDCl}_3$ ) of compound of **4j**

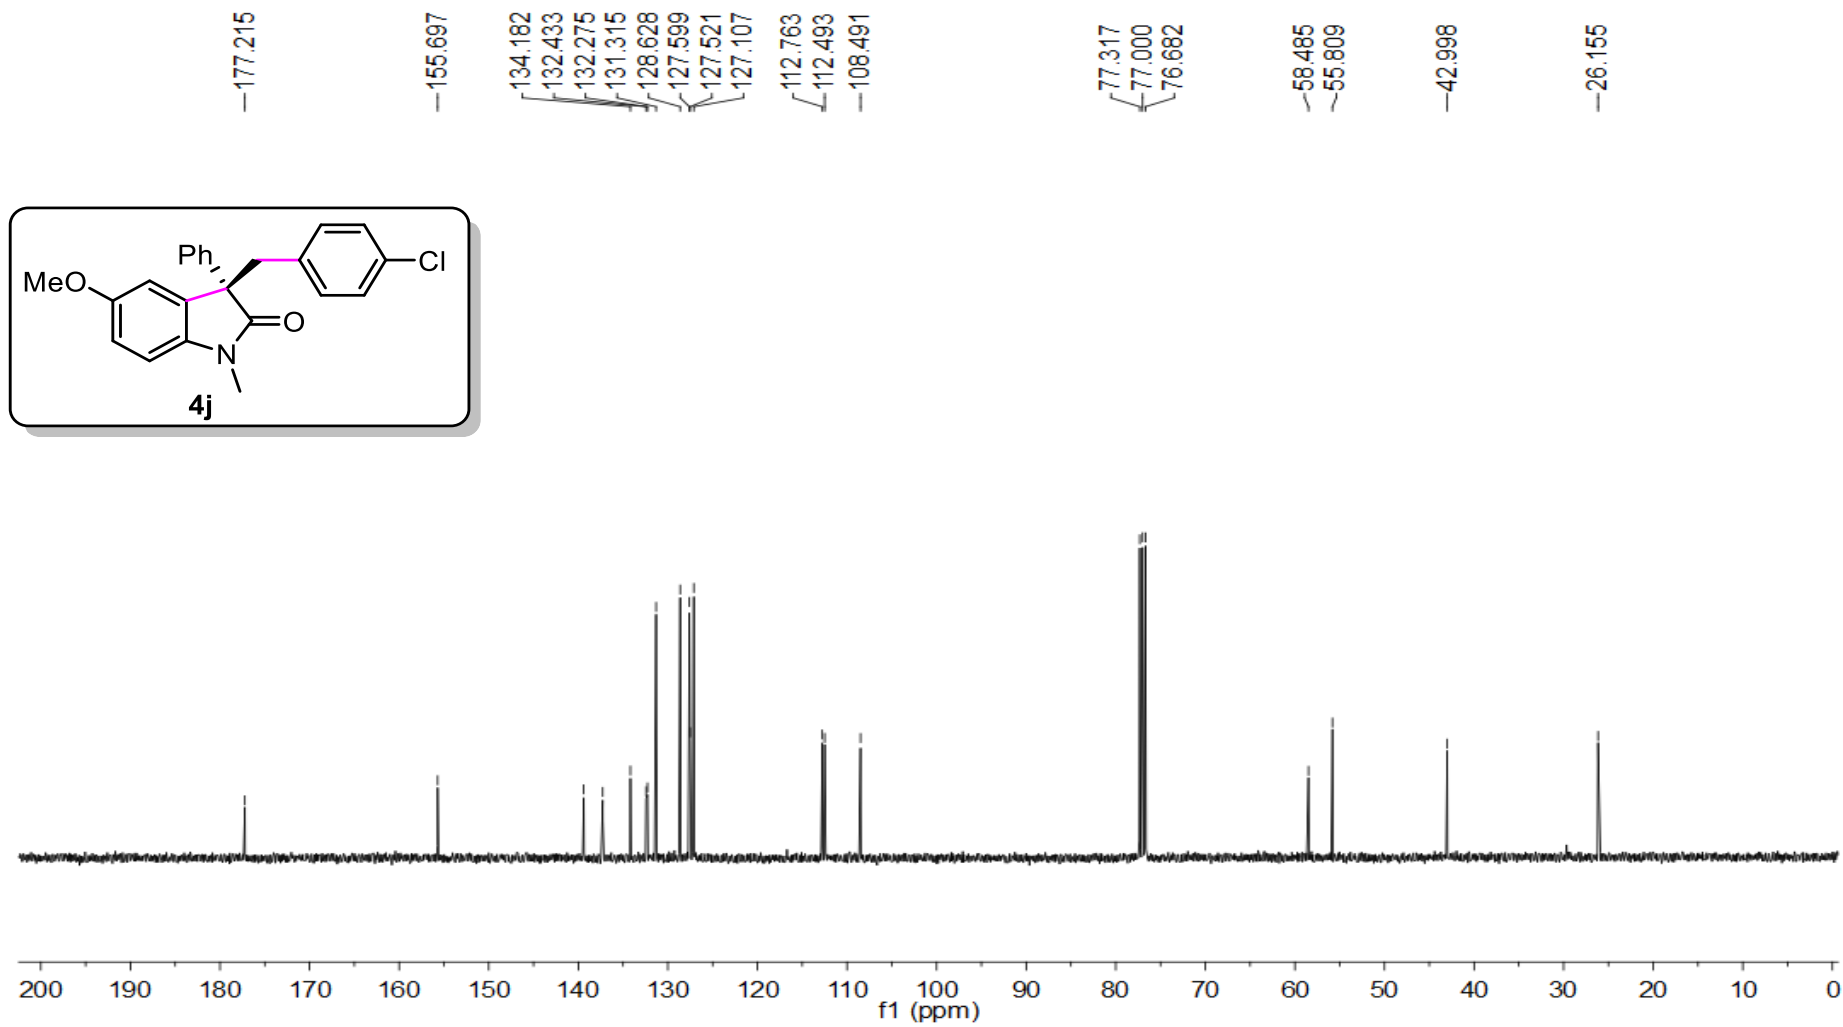

<sup>1</sup>H NMR (400 MHz, CDCl<sub>3</sub>) of compound **4k**

7.719  
7.698  
7.484  
7.465  
7.366  
7.348  
7.328  
7.305  
7.287  
7.261  
6.961  
6.941  
6.834  
6.828  
6.750  
6.743  
6.729  
6.722  
6.523  
6.502

3.843  
3.791  
3.778  
3.760  
3.478  
3.447  
-2.923

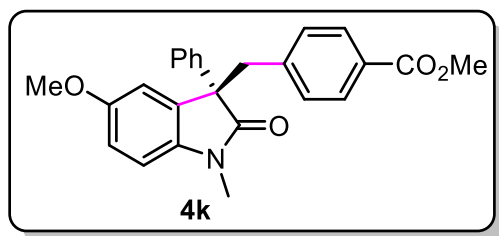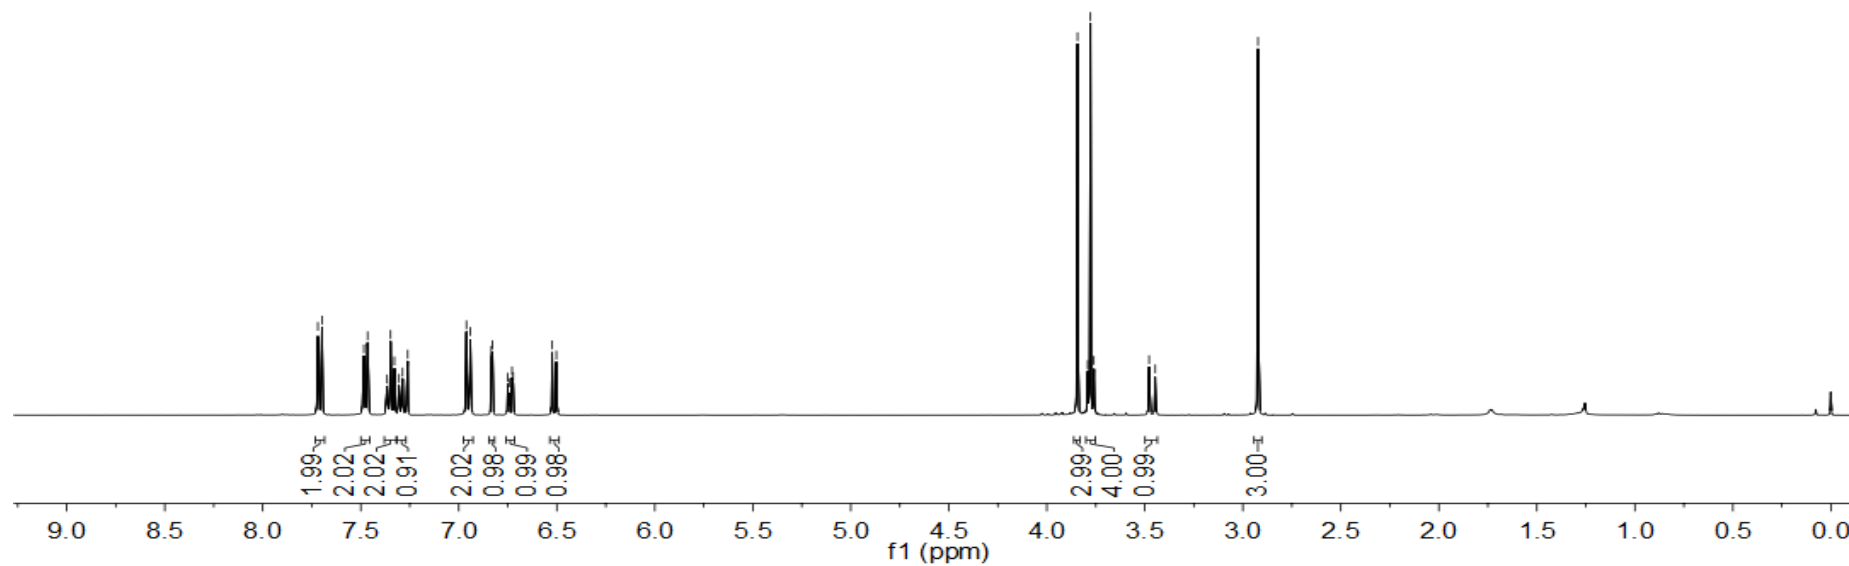

$^{13}\text{C}$  NMR (101 MHz,  $\text{CDCl}_3$ ) of compound **4k**

—177.095  
—166.987  
—155.688  
141.194  
139.350  
137.173  
132.096  
130.006  
128.712  
128.623  
128.329  
127.536  
127.068  
112.812  
112.492  
108.435  
  
77.318  
77.000  
76.682  
  
58.400  
55.785  
51.918  
43.603  
  
26.119

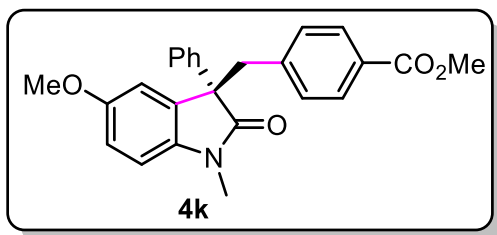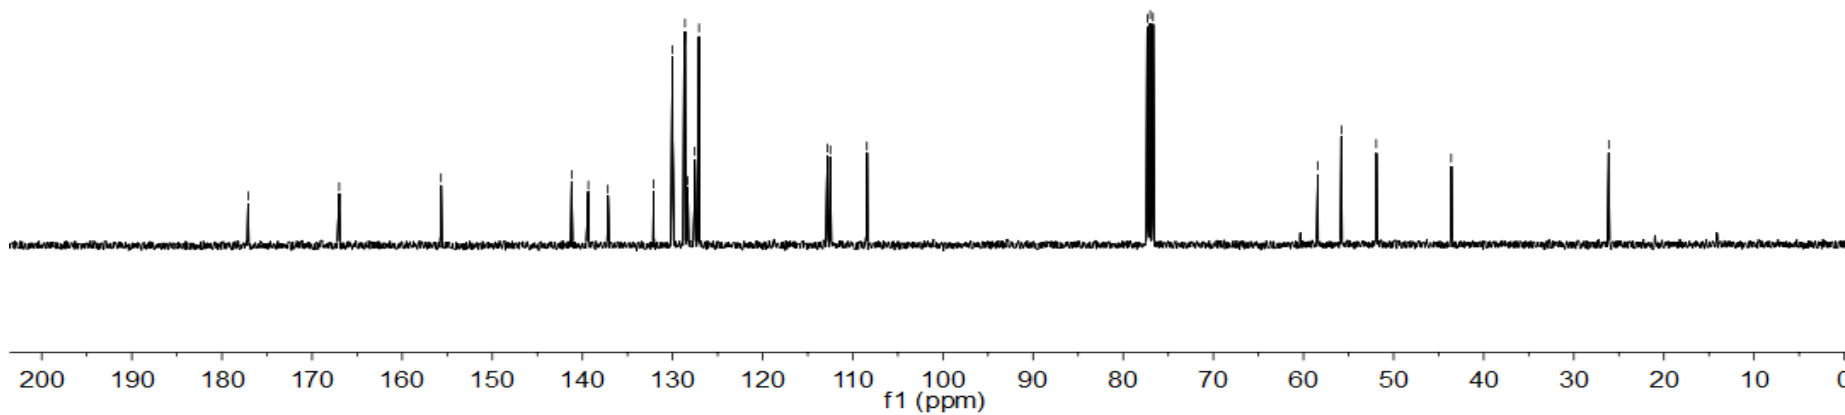

$^1\text{H}$  NMR (400 MHz,  $\text{CDCl}_3$ ) of compound **4I**

7.469  
7.372  
7.350  
7.311  
7.293  
7.256  
— 6.976  
— 6.752  
— 6.559  
— 6.538

3.782  
3.771  
3.739  
— 3.494  
— 3.462  
— 2.925

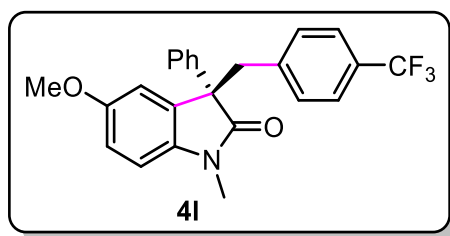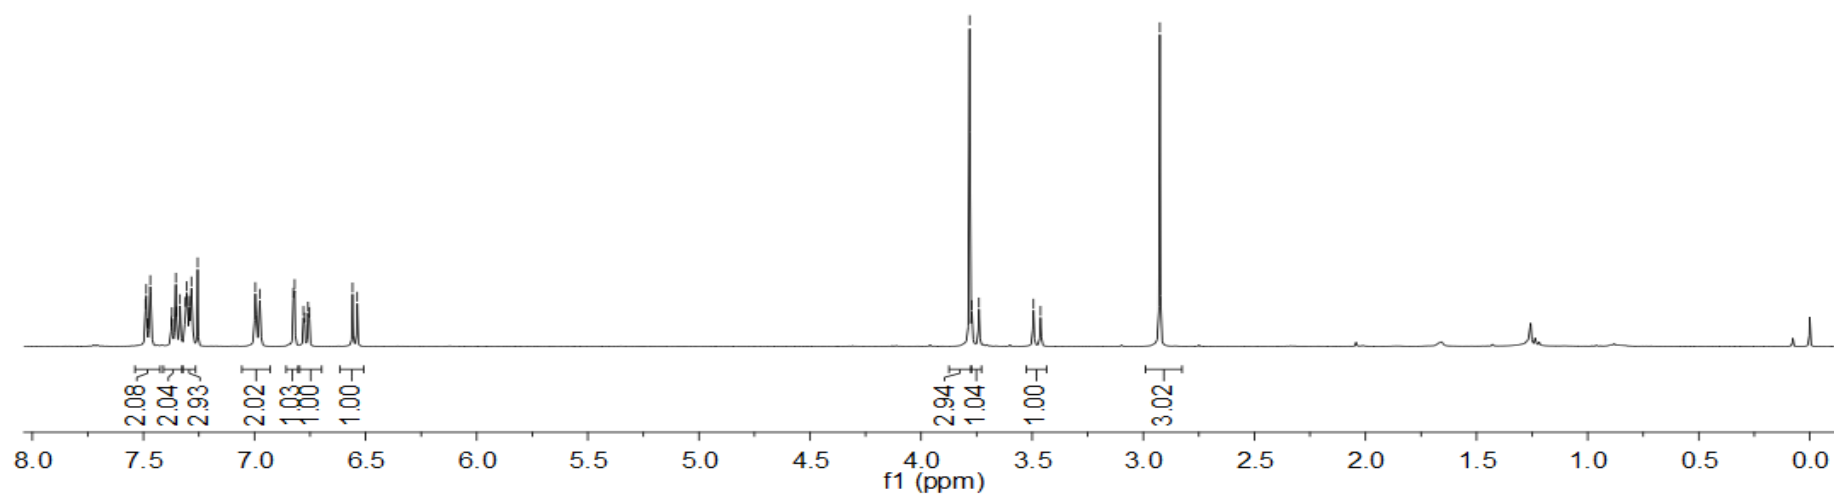

$^{13}\text{C}$  NMR (101 MHz,  $\text{CDCl}_3$ ) of compound **4I**

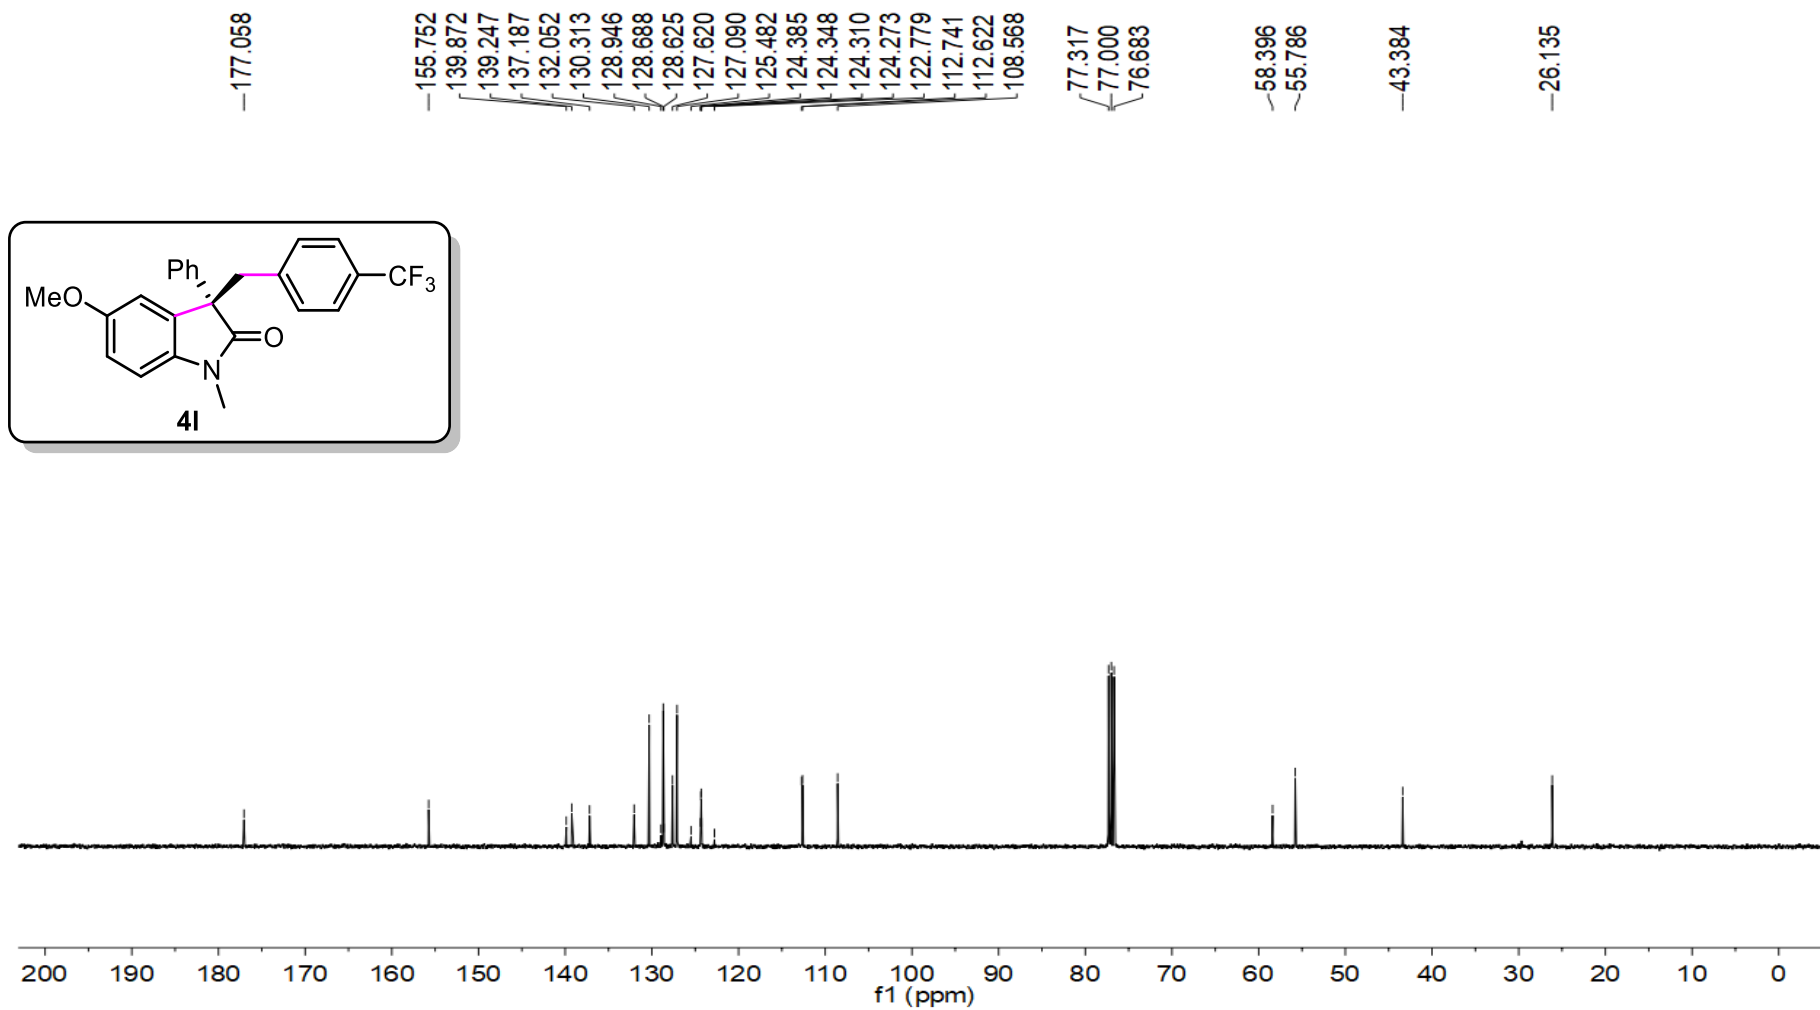



$^1\text{H}$  NMR (400 MHz,  $\text{CDCl}_3$ ) of compound **4m**

7.913  
7.891  
7.461  
7.344  
7.264  
7.047  
6.754  
6.566  
6.545

3.861  
3.829  
3.799  
3.514  
3.482  
-2.947

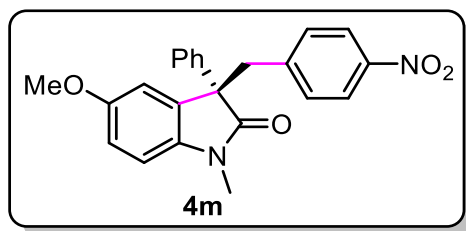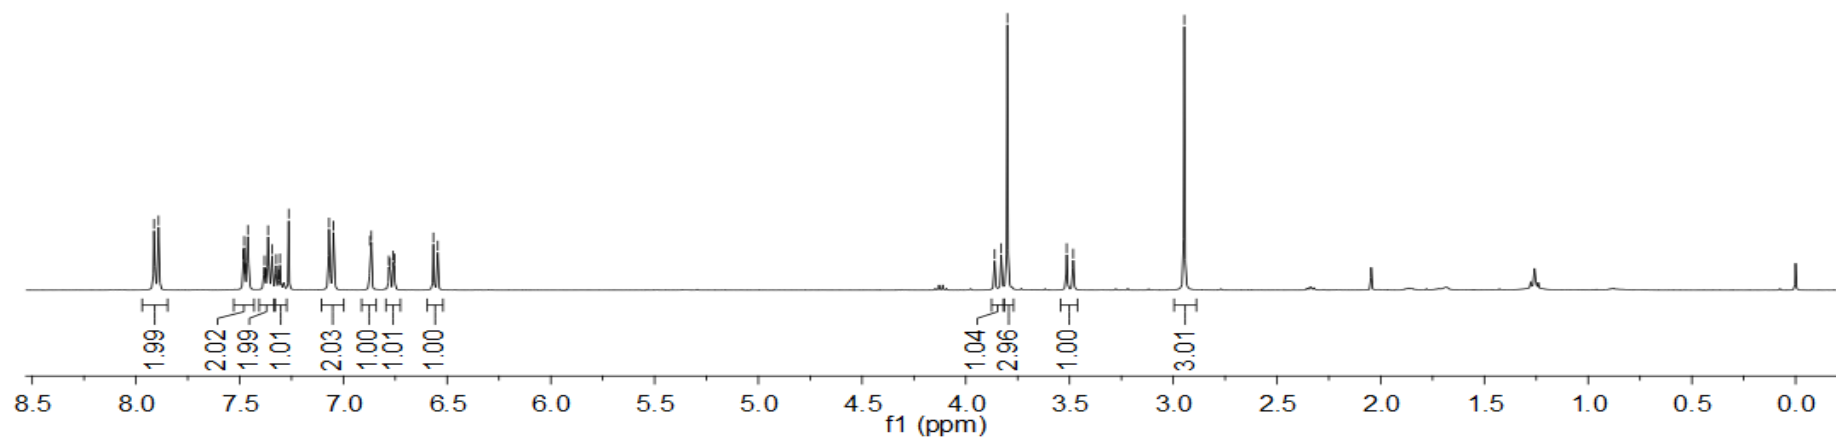

$^{13}\text{C}$  NMR (101 MHz,  $\text{CDCl}_3$ ) of compound **4m**

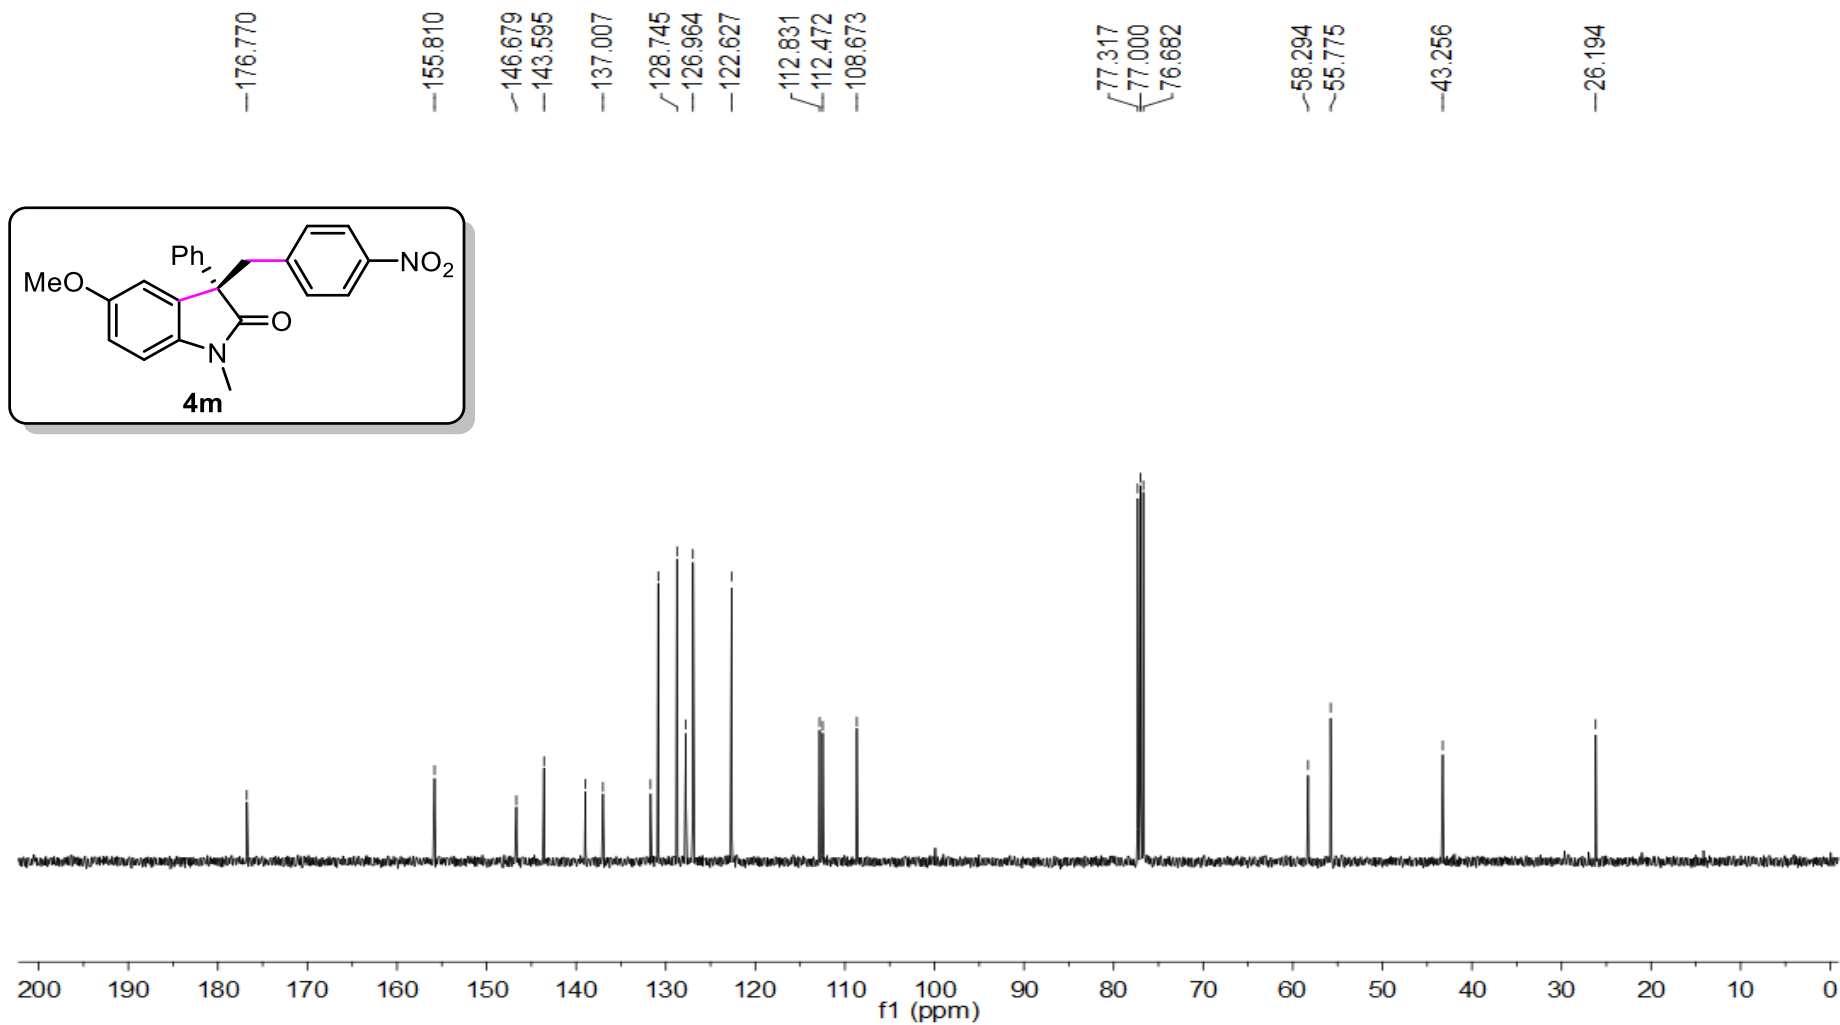

$^1\text{H}$  NMR (400 MHz,  $\text{CDCl}_3$ ) of compound **4n**

7.548  
7.545  
7.527  
7.363  
7.346  
7.326  
7.303  
7.291  
7.286  
7.267  
7.251  
6.994  
6.979  
6.967  
6.865  
6.859  
6.845  
6.839  
6.831  
6.824  
6.796  
6.790  
6.775  
6.769  
6.697  
6.678  
6.636  
6.615  
6.544  
6.538  
3.686  
3.643  
3.609  
3.595  
3.561  
-3.036  
-2.052

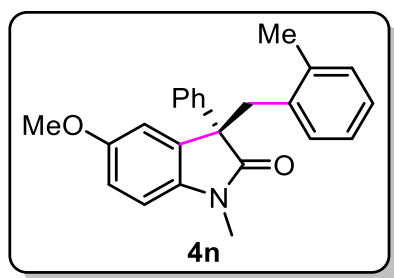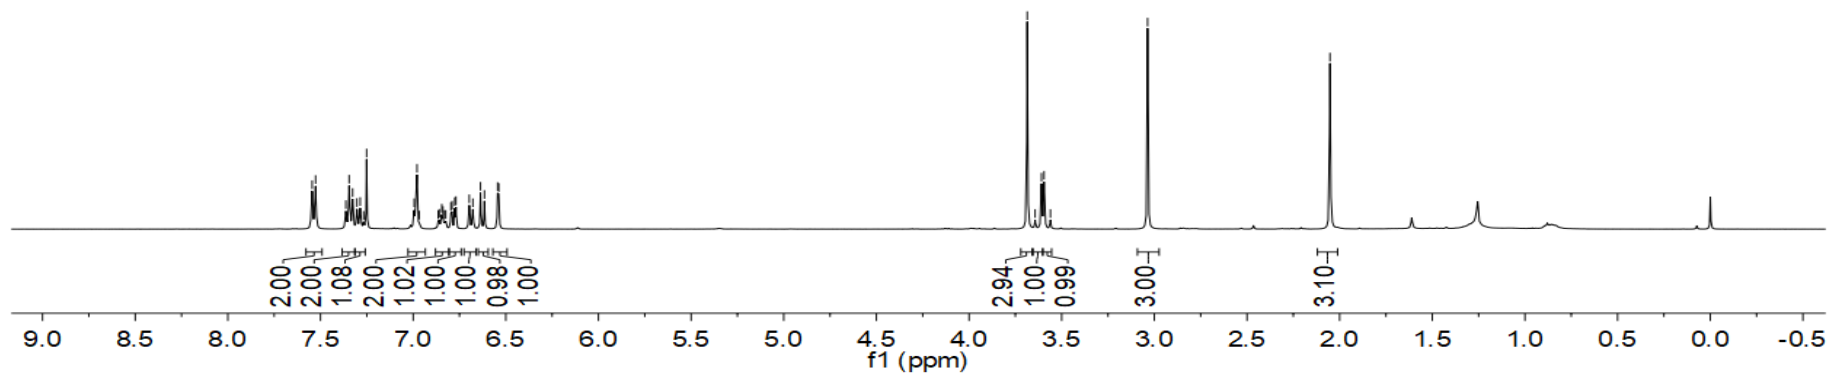

$^{13}\text{C}$  NMR (101 MHz,  $\text{CDCl}_3$ ) of compound **4n**

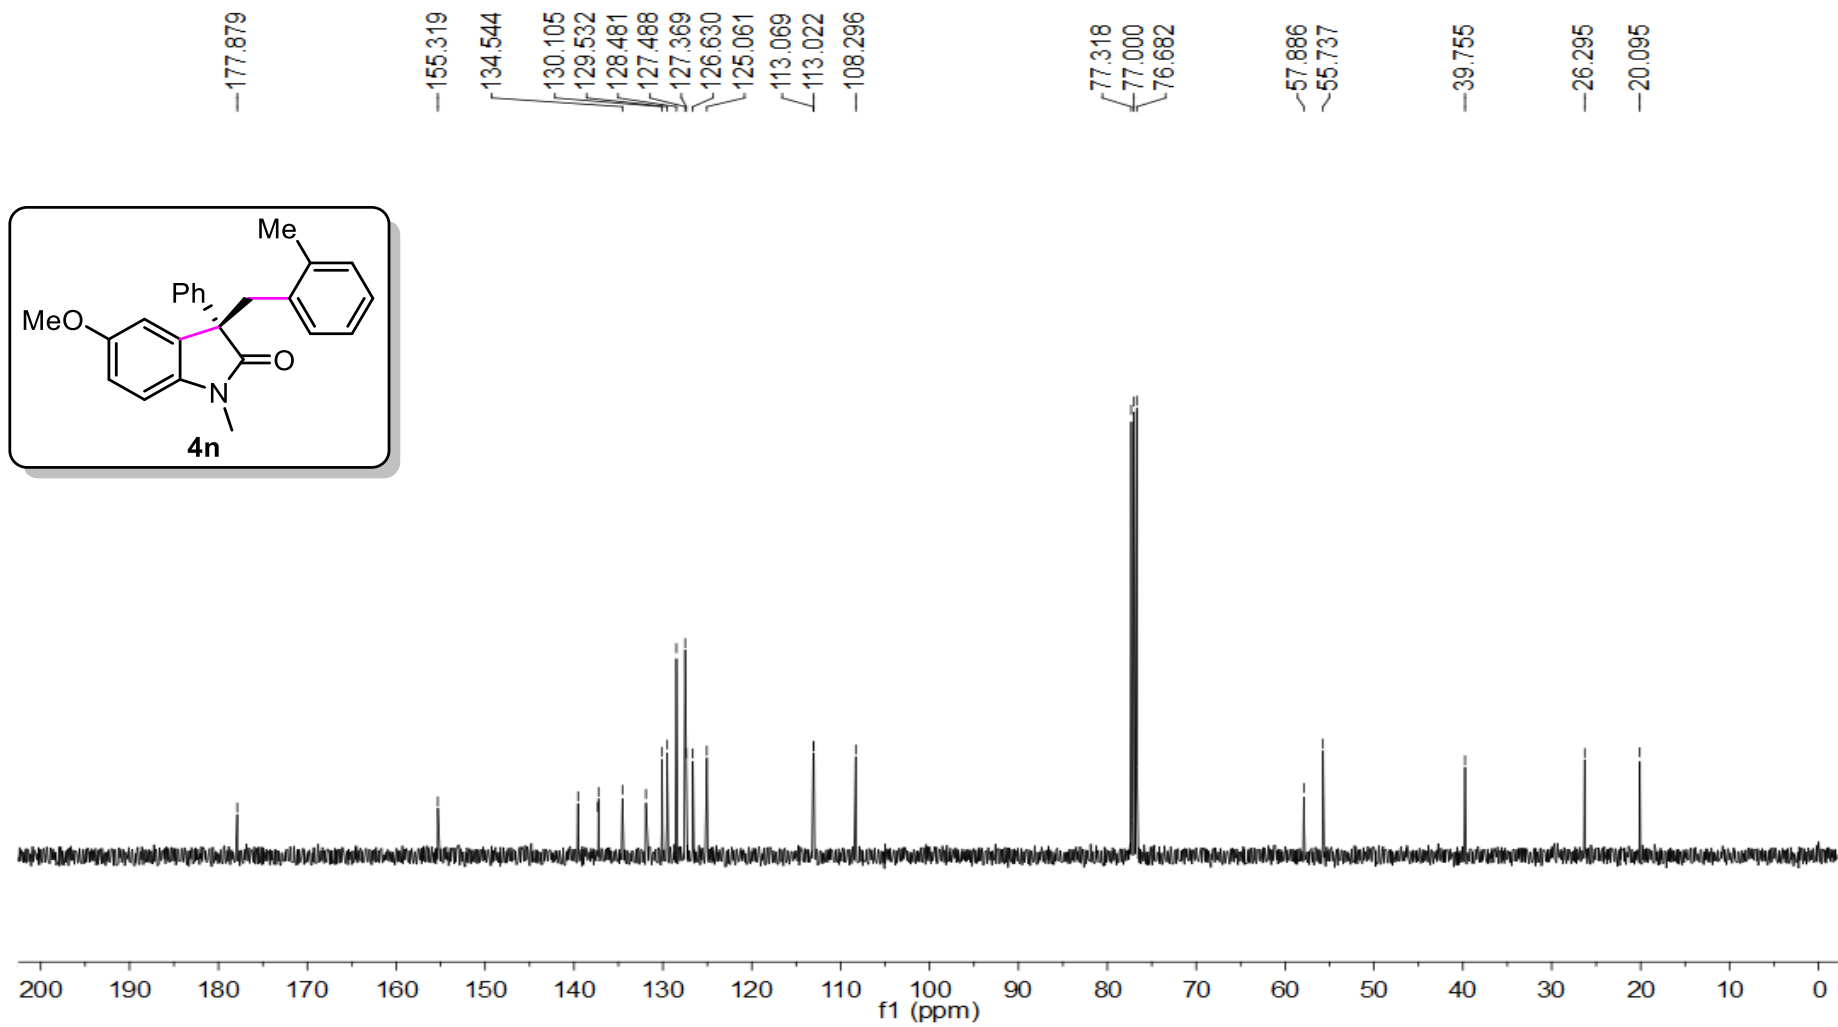

$^1\text{H}$  NMR (400 MHz,  $\text{CDCl}_3$ ) of compound **4o**

7.502  
7.483  
7.359  
7.341  
7.322  
7.294  
7.276  
7.251  
6.929  
6.910  
6.892  
6.871  
6.852  
6.789  
6.783  
6.755  
6.749  
6.734  
6.728  
6.670  
6.654  
6.636  
6.534  
6.513

3.768  
3.654  
3.622  
3.424  
3.392  
-2.934  
-2.137

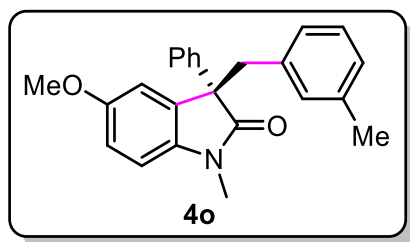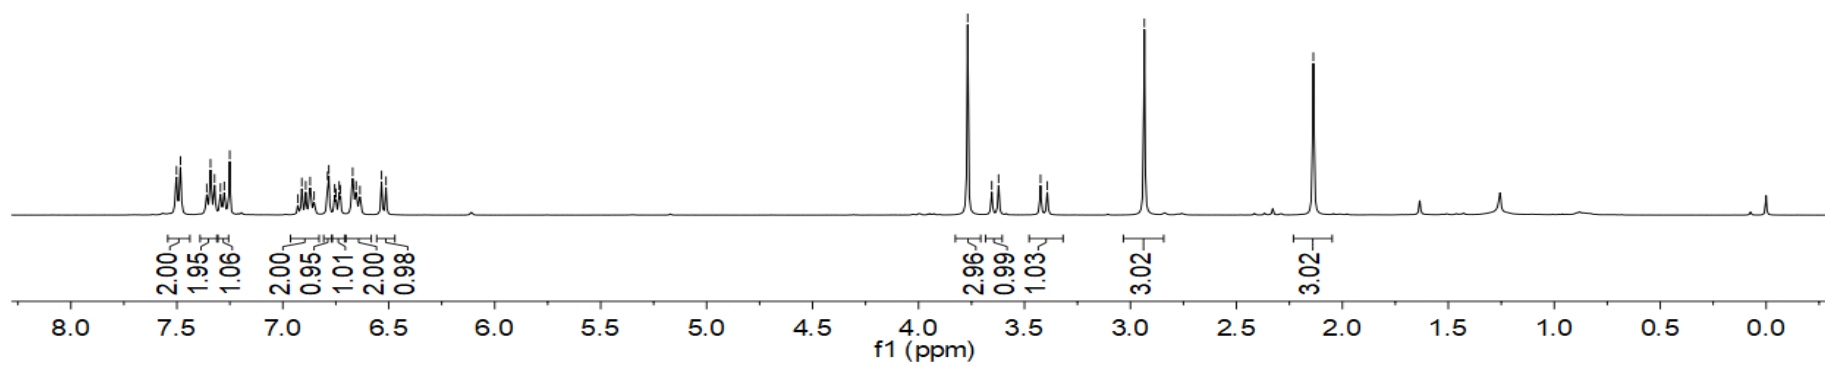

$^{13}\text{C}$  NMR (101 MHz,  $\text{CDCl}_3$ ) of compound **4o**

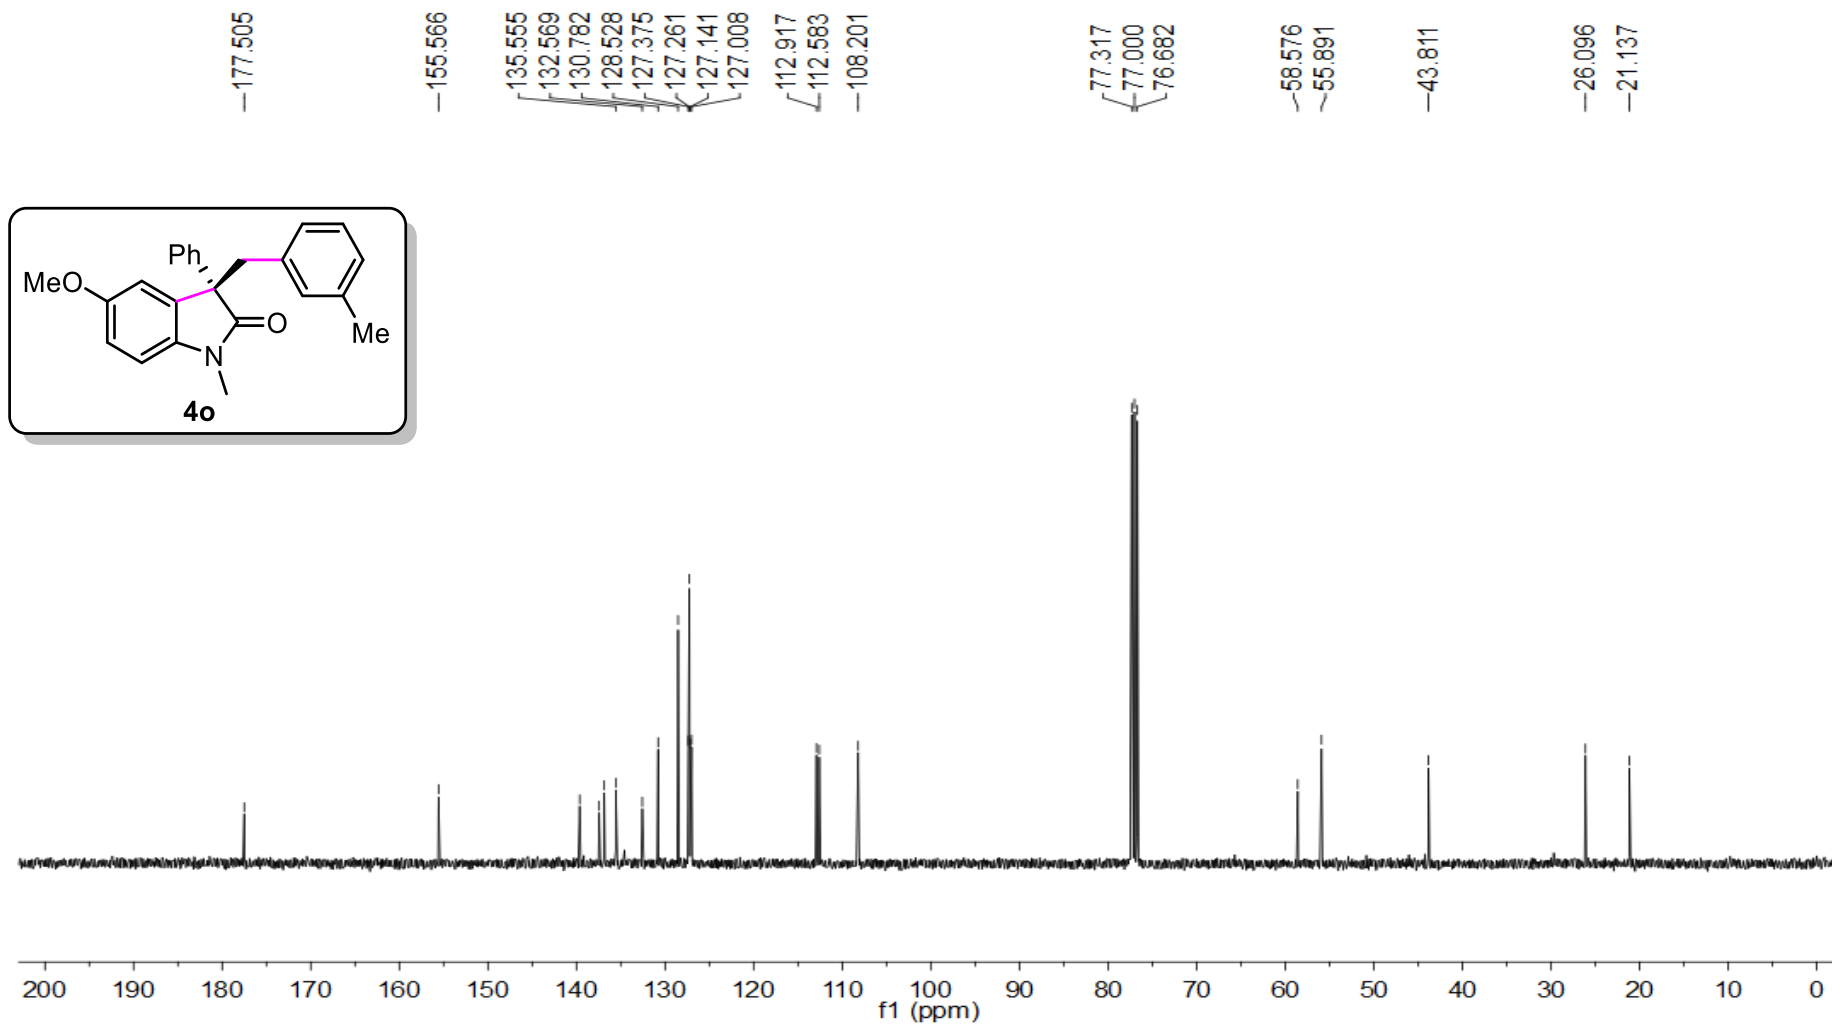

$^1\text{H}$  NMR (400 MHz,  $\text{CDCl}_3$ ) of compound **4p**

7.687  
7.683  
7.666  
7.663  
7.319  
7.313  
7.308  
7.298  
7.279  
7.266  
7.256  
6.996  
6.978  
6.959  
6.870  
6.851  
6.835  
6.828  
6.814  
6.807  
6.750  
6.729  
5.905  
5.899

3.883  
3.847  
3.507  
3.464  
3.428  
3.174

1.595

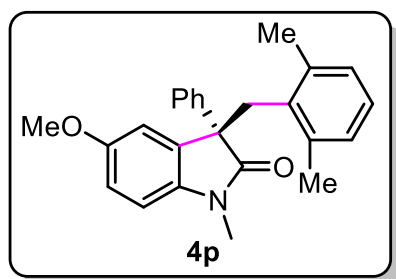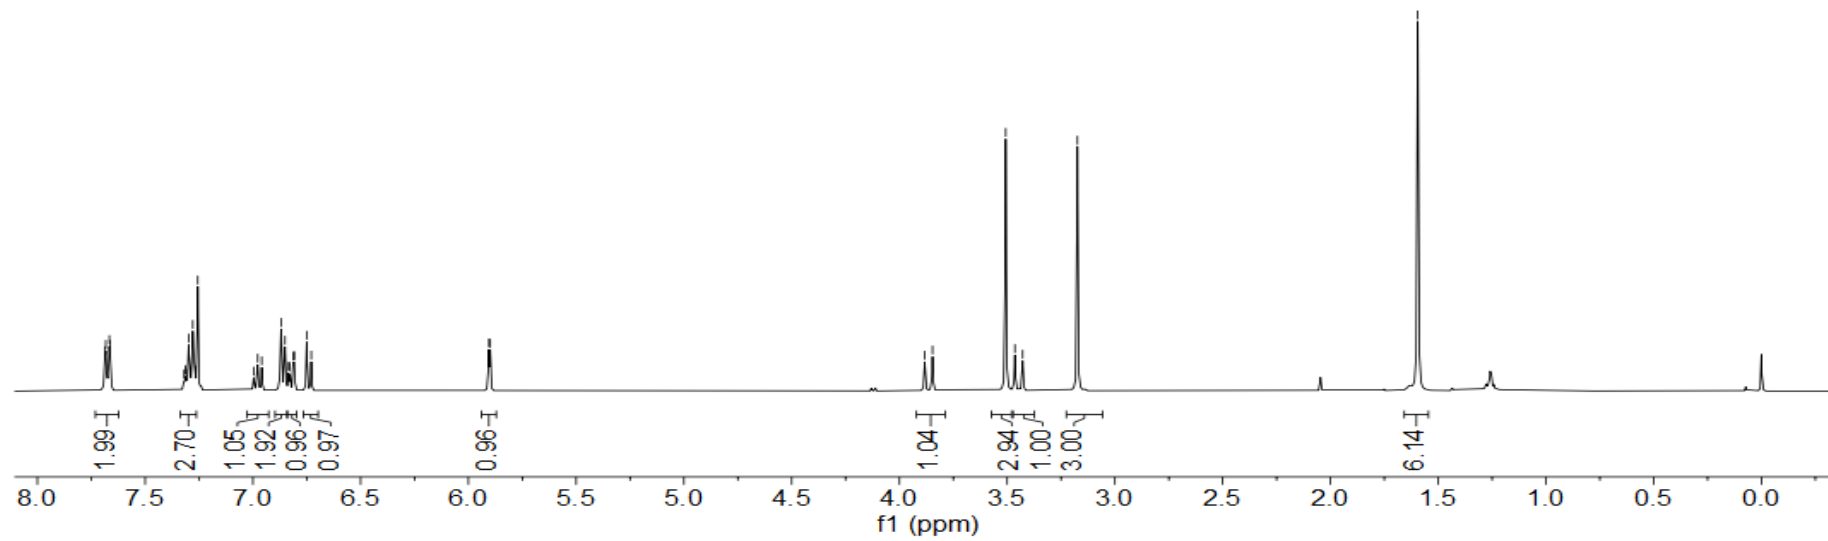

$^{13}\text{C}$  NMR (101 MHz,  $\text{CDCl}_3$ ) of compound **4p**

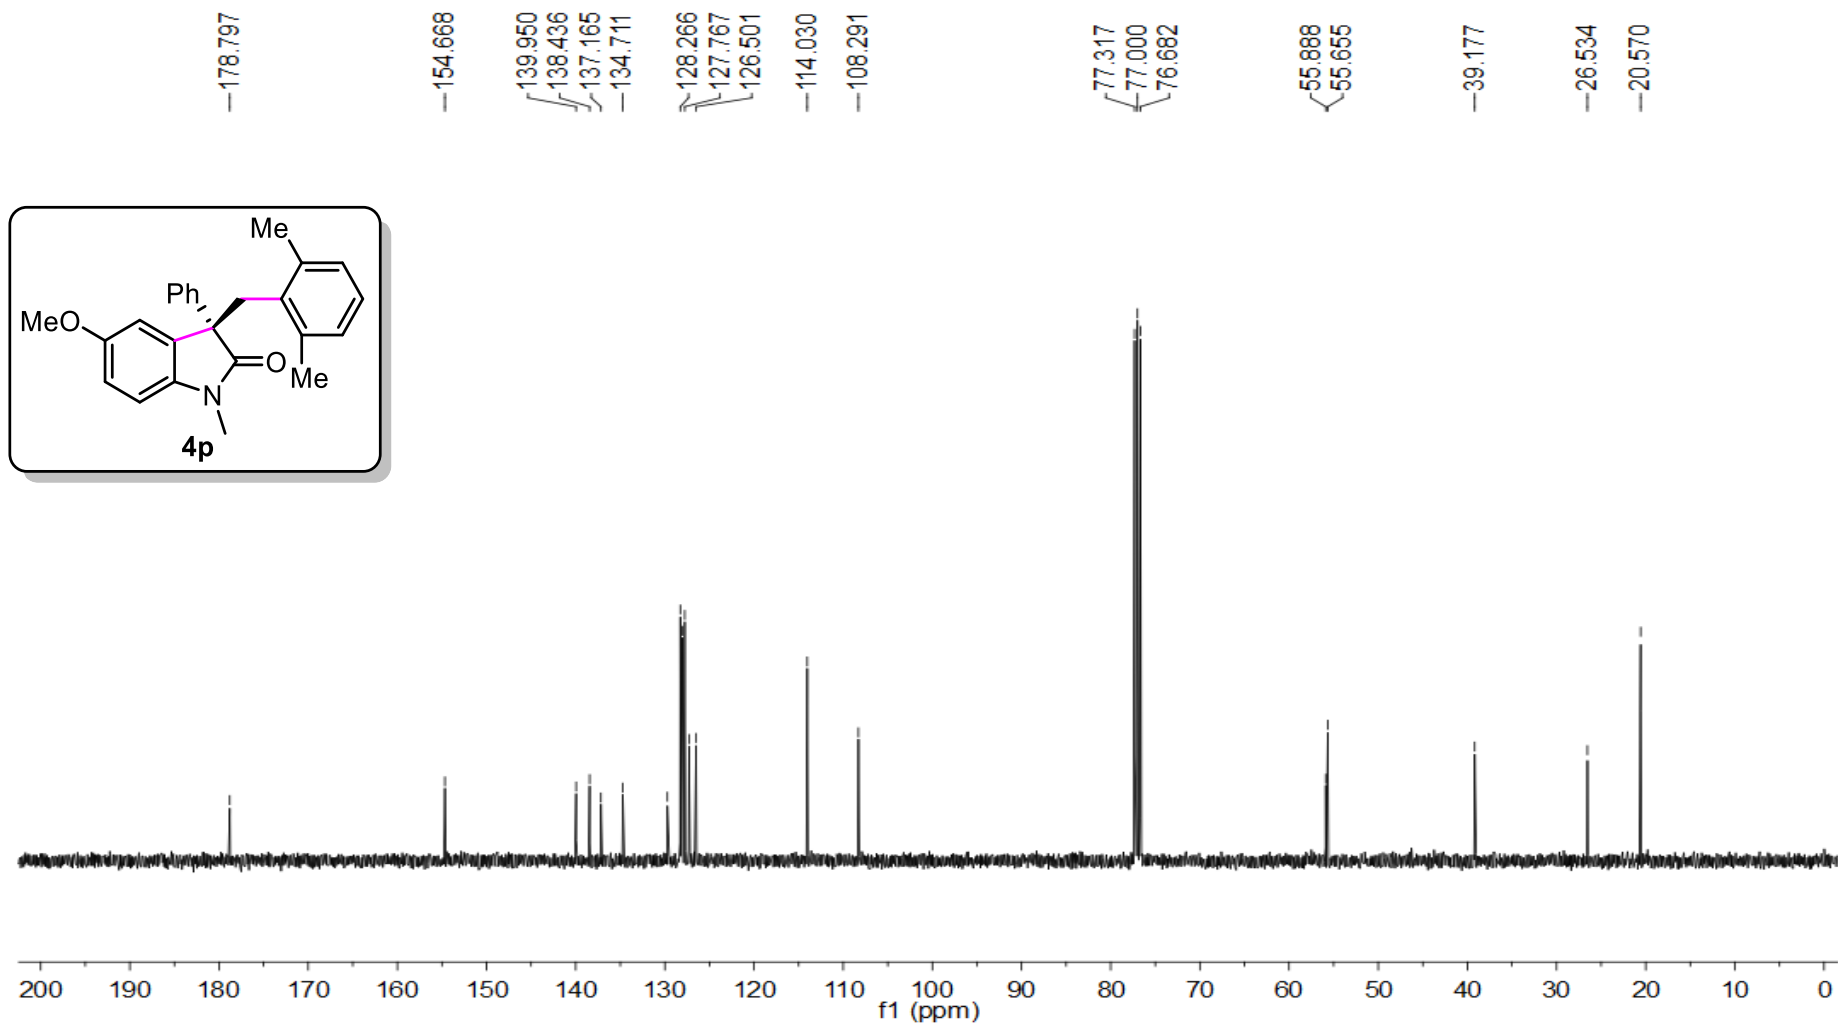



$^1\text{H}$  NMR (400 MHz,  $\text{CDCl}_3$ ) of compound **4q**

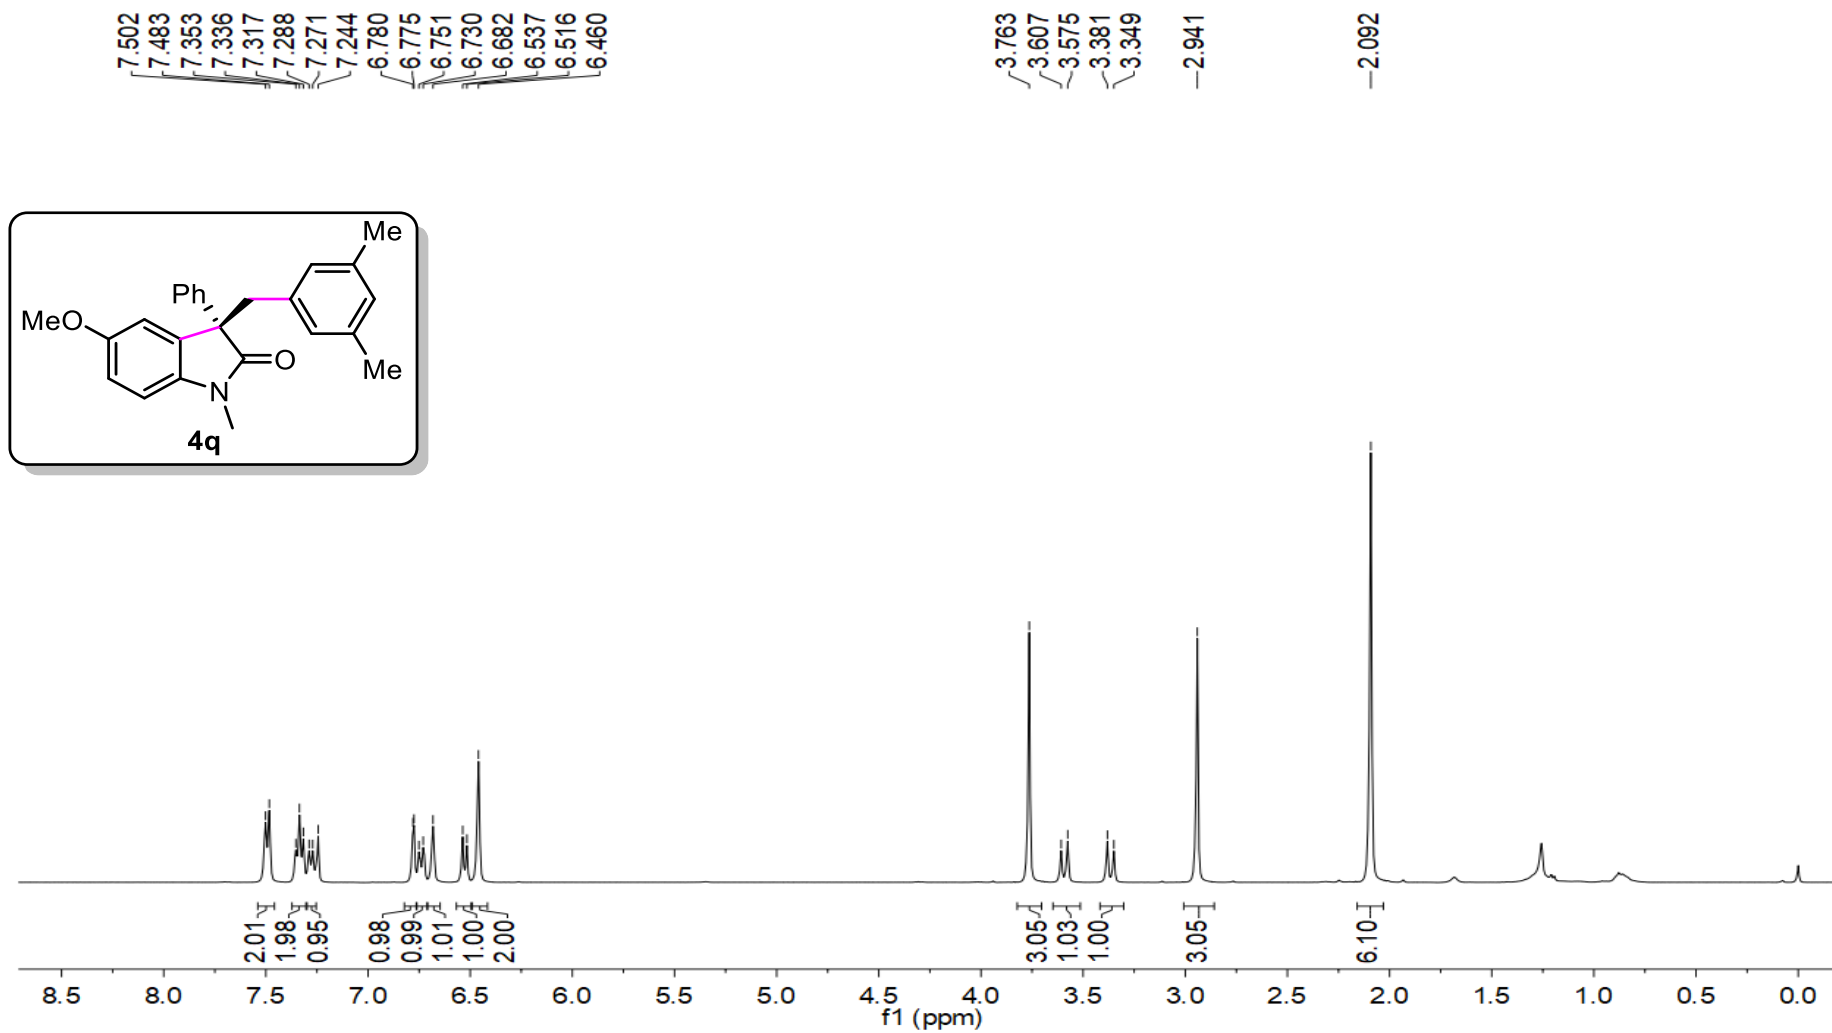

$^{13}\text{C}$  NMR (101 MHz,  $\text{CDCl}_3$ ) of compound **4q**

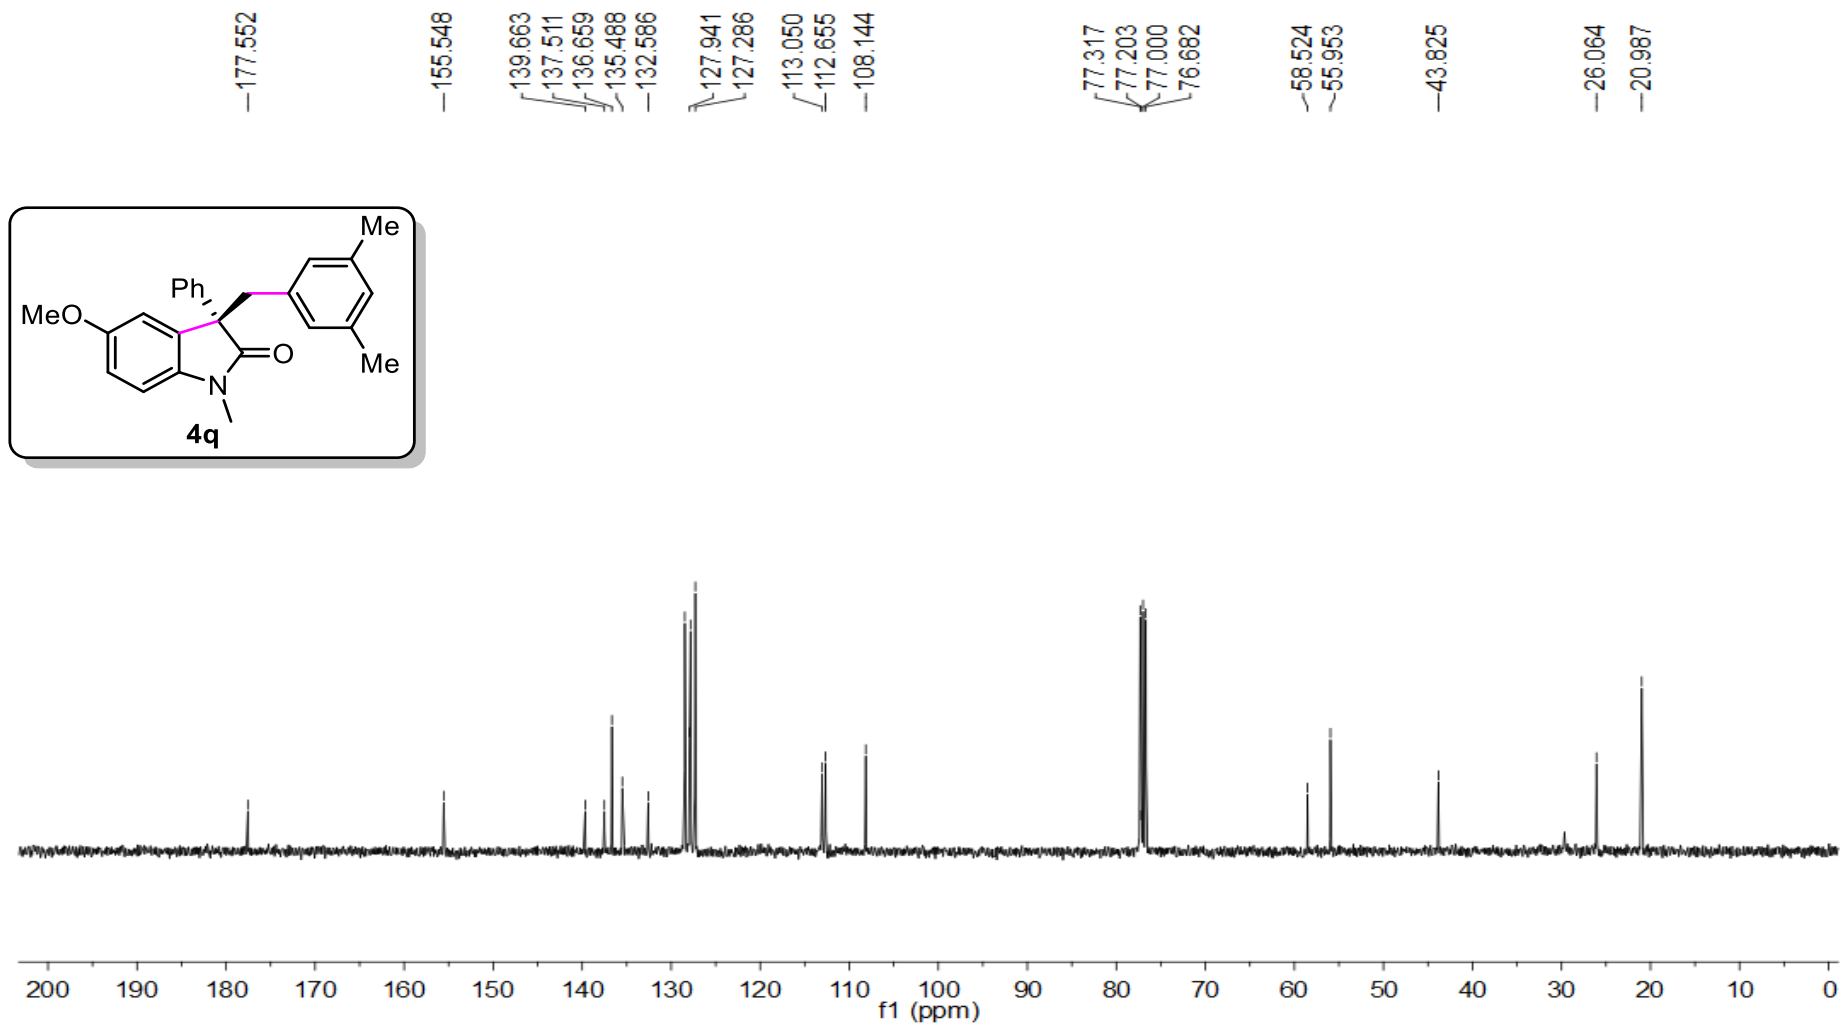

$^1\text{H}$  NMR (400 MHz,  $\text{CDCl}_3$ ) of compound **4r**

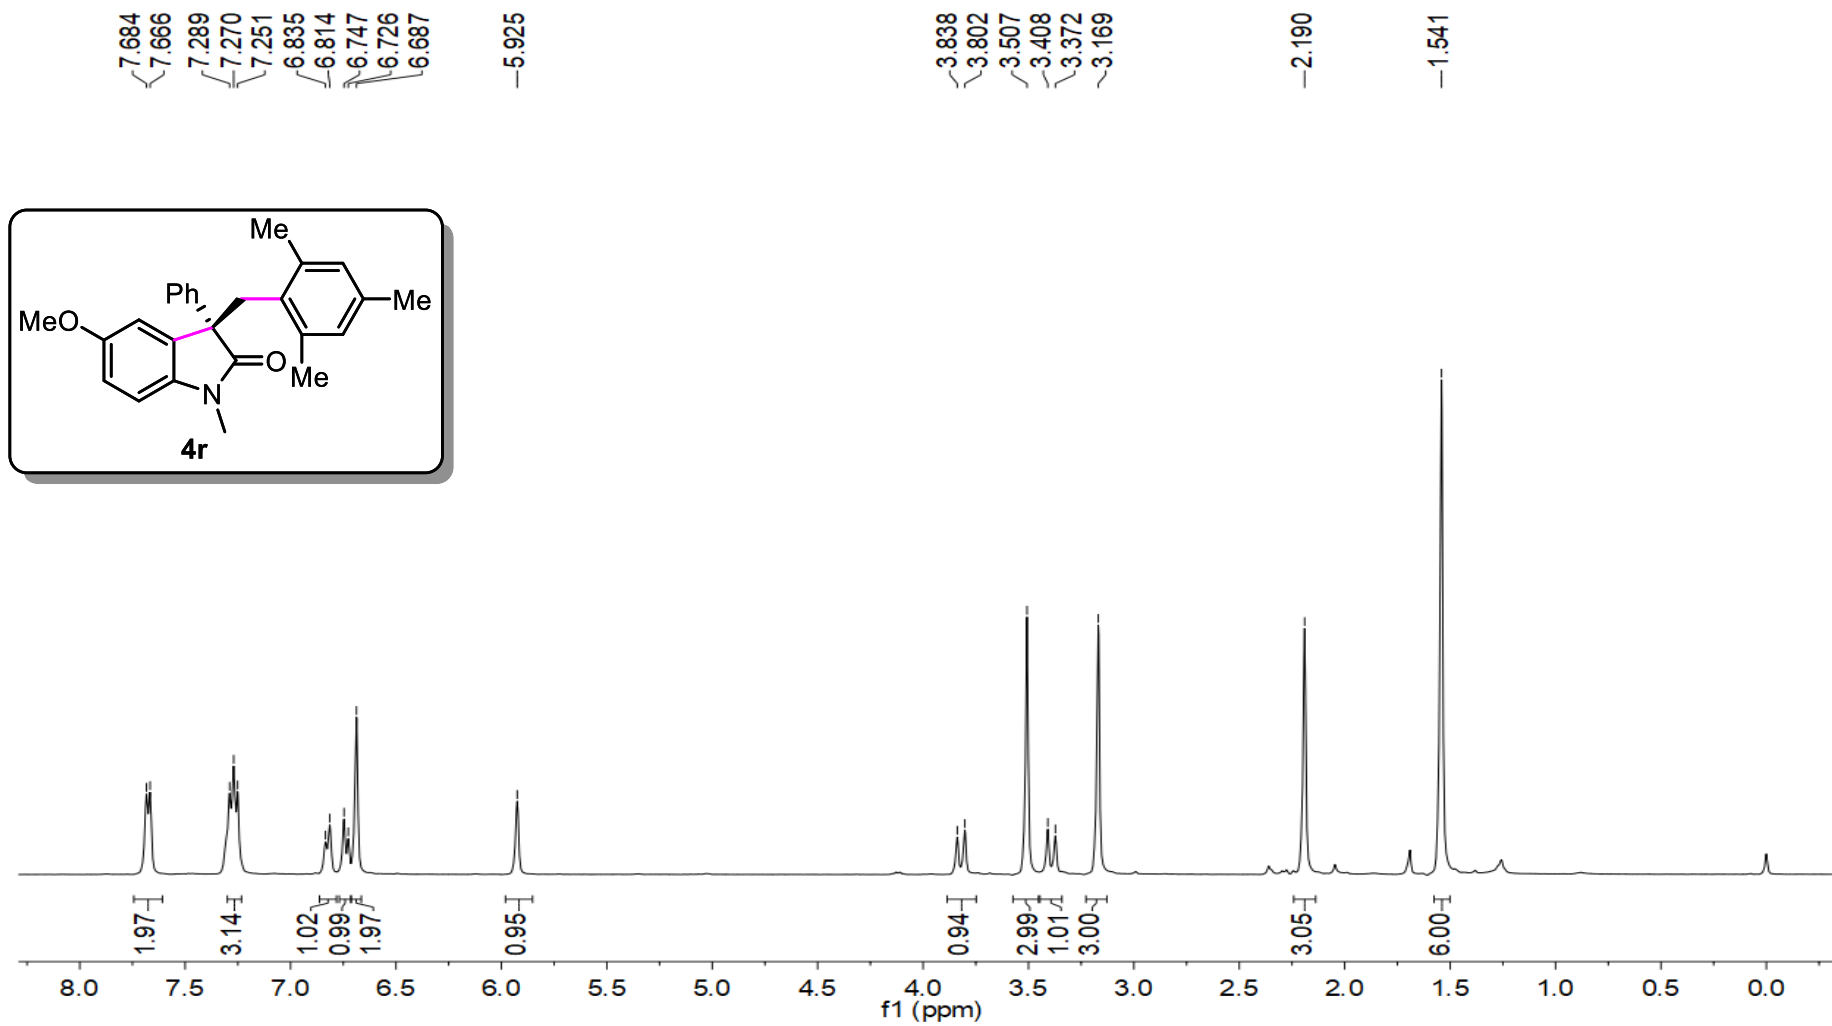

$^{13}\text{C}$  NMR (101 MHz,  $\text{CDCl}_3$ ) of compound **4r**

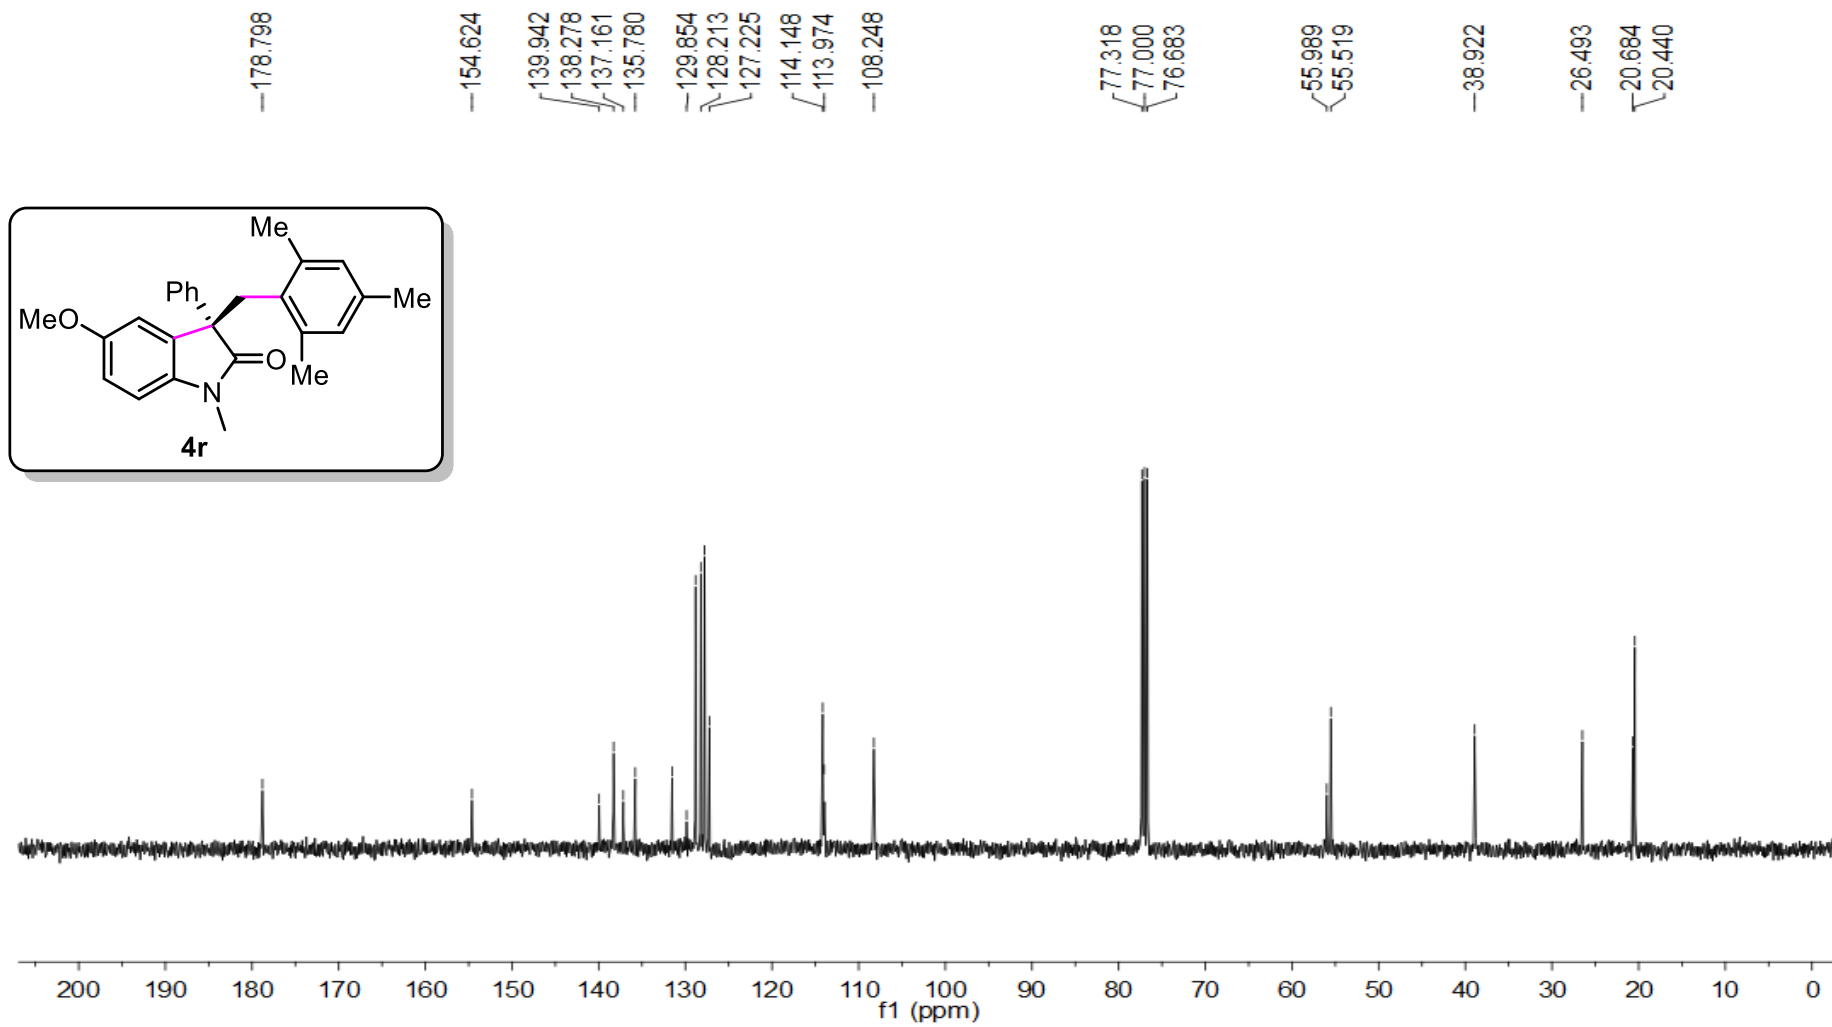

$^1\text{H}$  NMR (400 MHz,  $\text{CDCl}_3$ ) of compound **4s**

7.489  
7.342  
7.320  
7.276  
7.249  
-6.994  
-6.836  
-6.829  
-6.695  
-6.693  
-6.682  
-6.675  
-6.661  
-6.655  
-6.553  
-6.532  
-6.492  
-6.471

3.869  
3.837  
3.723  
3.591  
3.558  
3.536  
-3.031

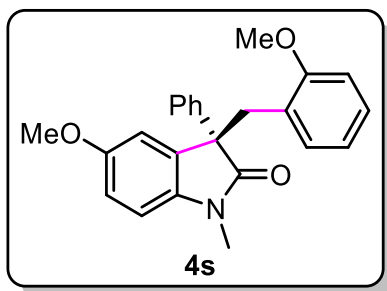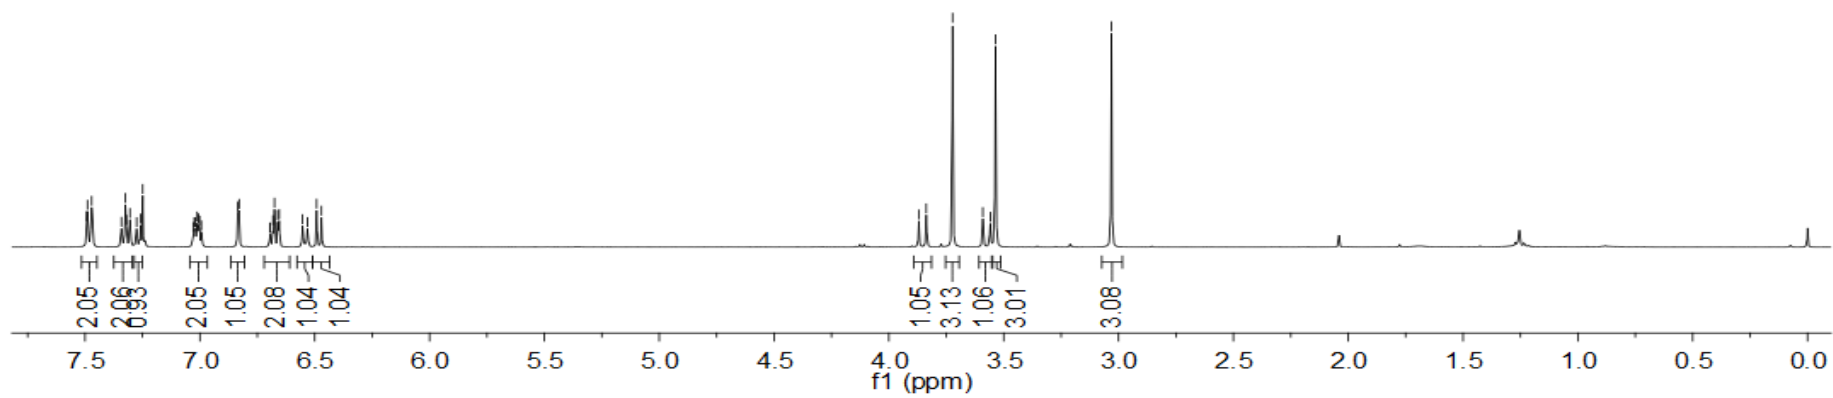

$^{13}\text{C}$  NMR (101 MHz,  $\text{CDCl}_3$ ) of compound **4s**

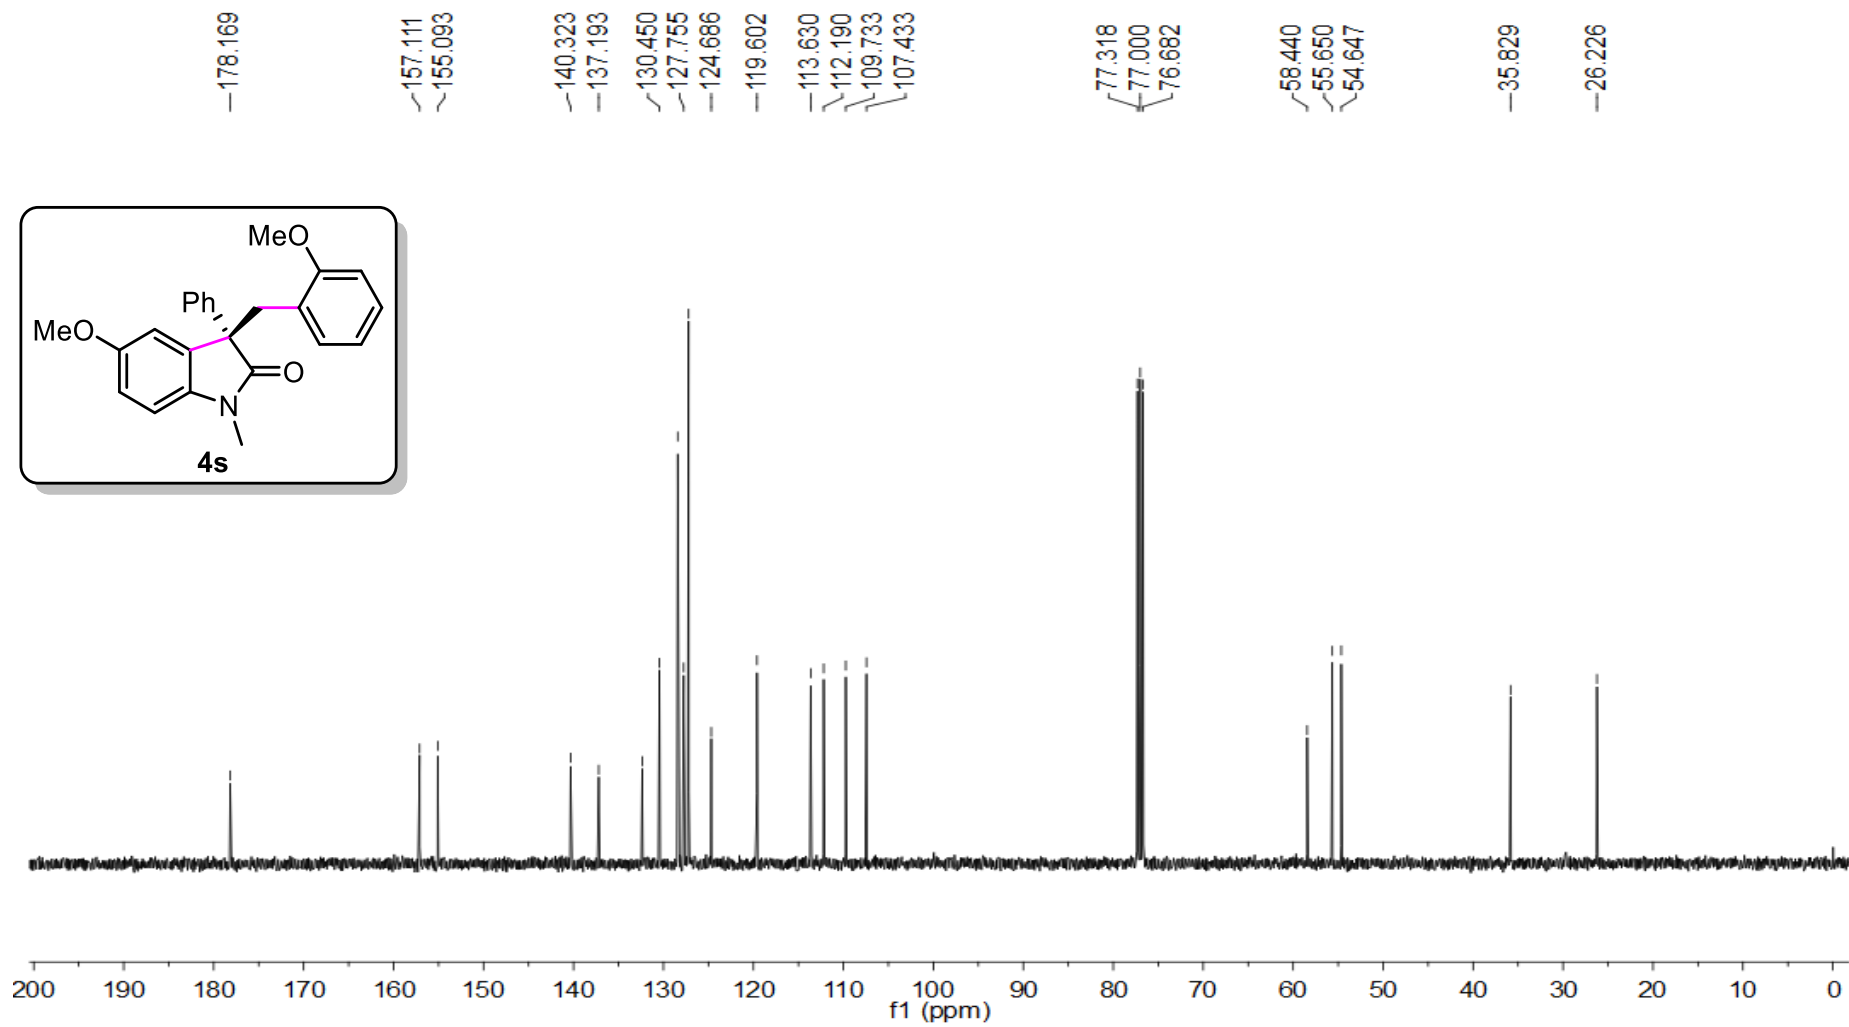

$^1\text{H}$  NMR (400 MHz,  $\text{CDCl}_3$ ) of compound **4t**

7.509  
7.506  
7.487  
7.359  
7.341  
7.322  
7.294  
7.281  
7.276  
7.252  
6.974  
6.954  
6.935  
6.785  
6.779  
6.767  
6.761  
6.746  
6.740  
6.629  
6.623  
6.609  
6.603  
6.560  
6.539  
6.505  
6.487  
6.361  
3.758  
3.657  
3.625  
3.567  
3.455  
2.650

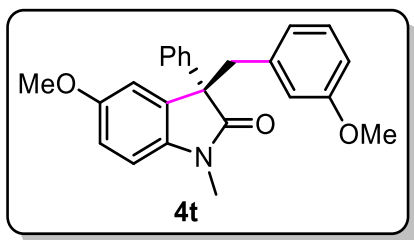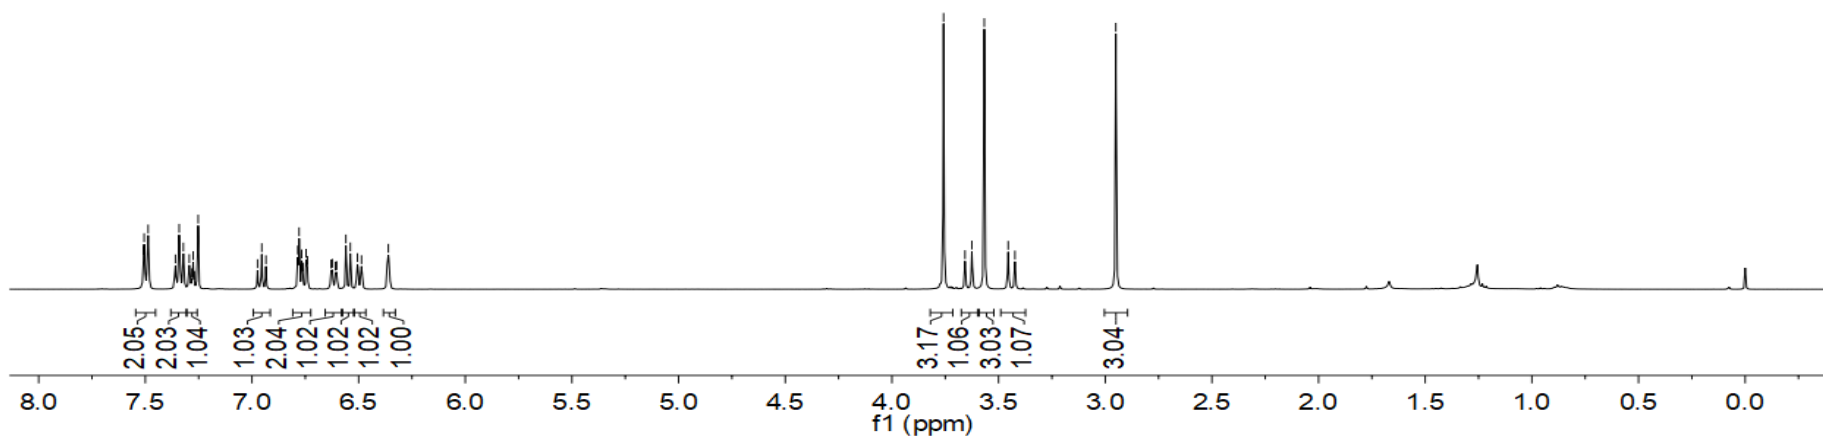

$^{13}\text{C}$  NMR (101 MHz,  $\text{CDCl}_3$ ) of compound **4t**

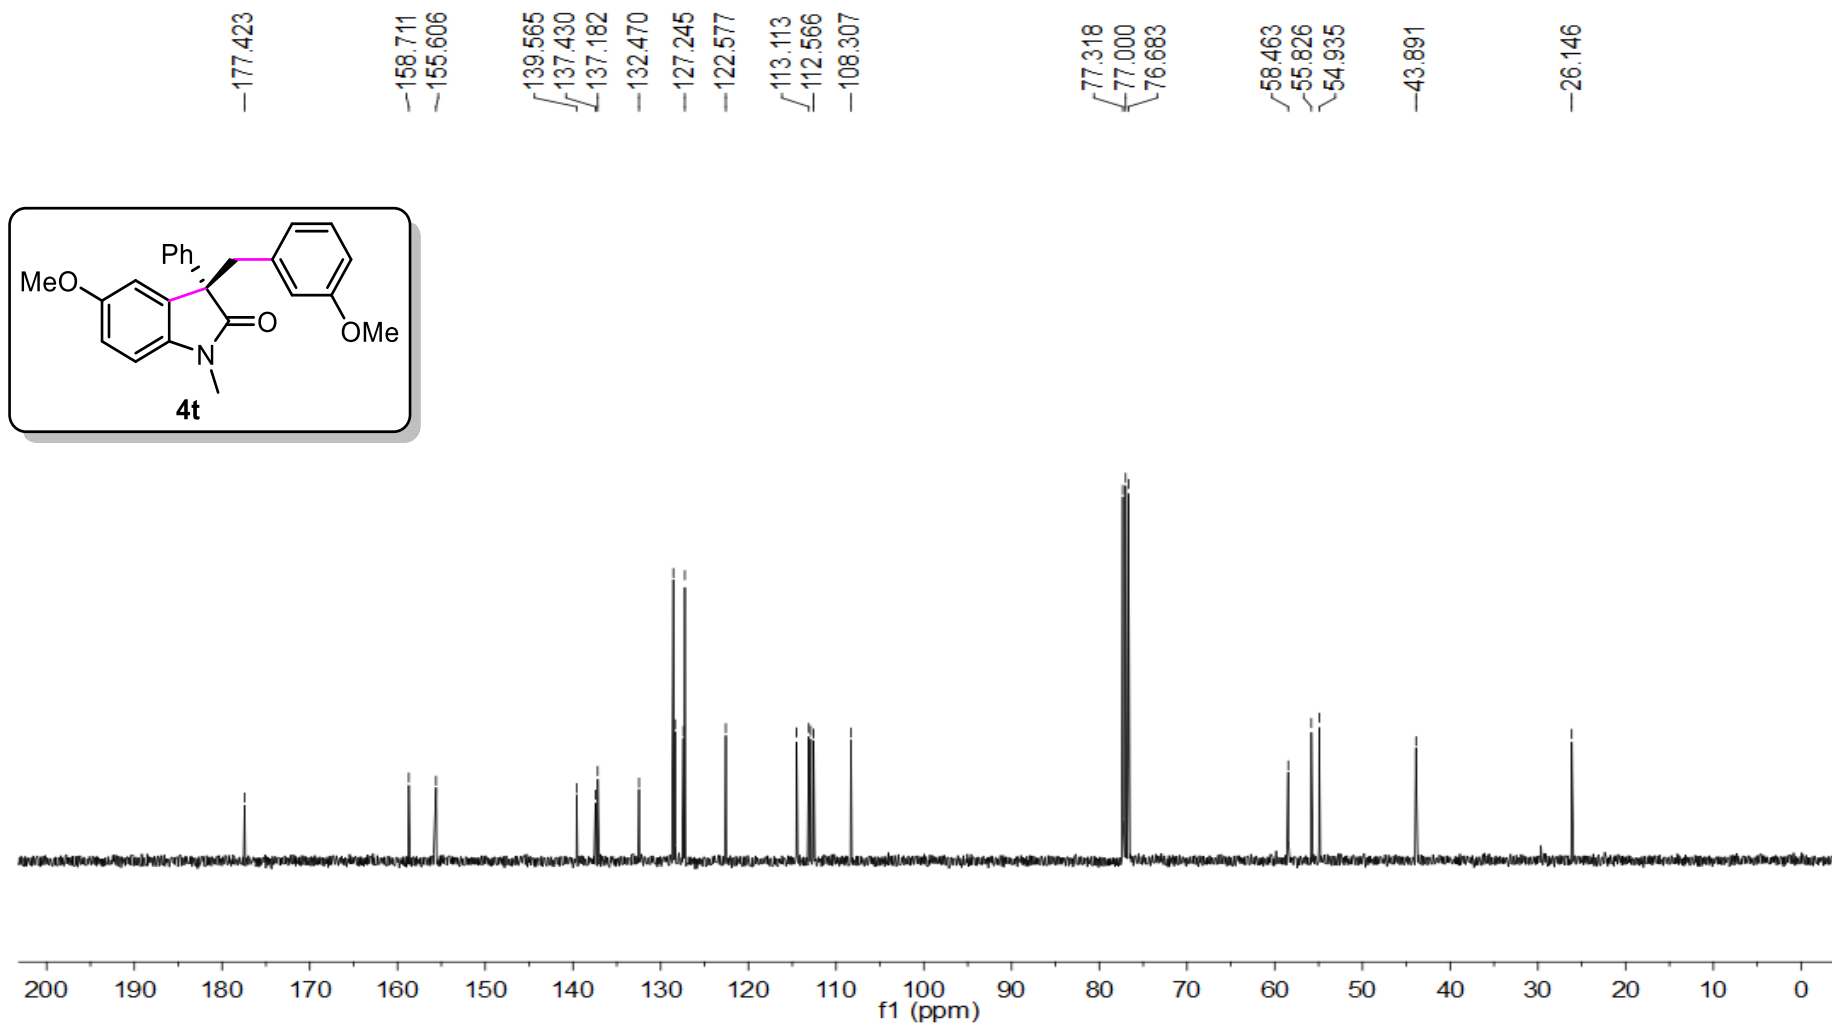



$^1\text{H}$  NMR (400 MHz,  $\text{CDCl}_3$ ) of compound **4u**

7.472  
7.357  
7.339  
7.320  
7.296  
7.278  
7.251  
7.014  
6.770  
6.718  
6.533  
6.512

3.756  
3.725  
3.692  
3.673  
3.640  
3.027

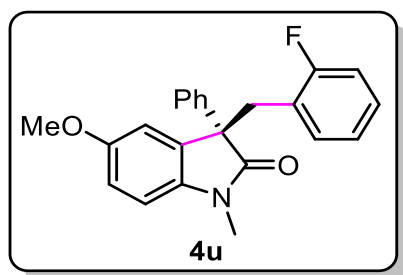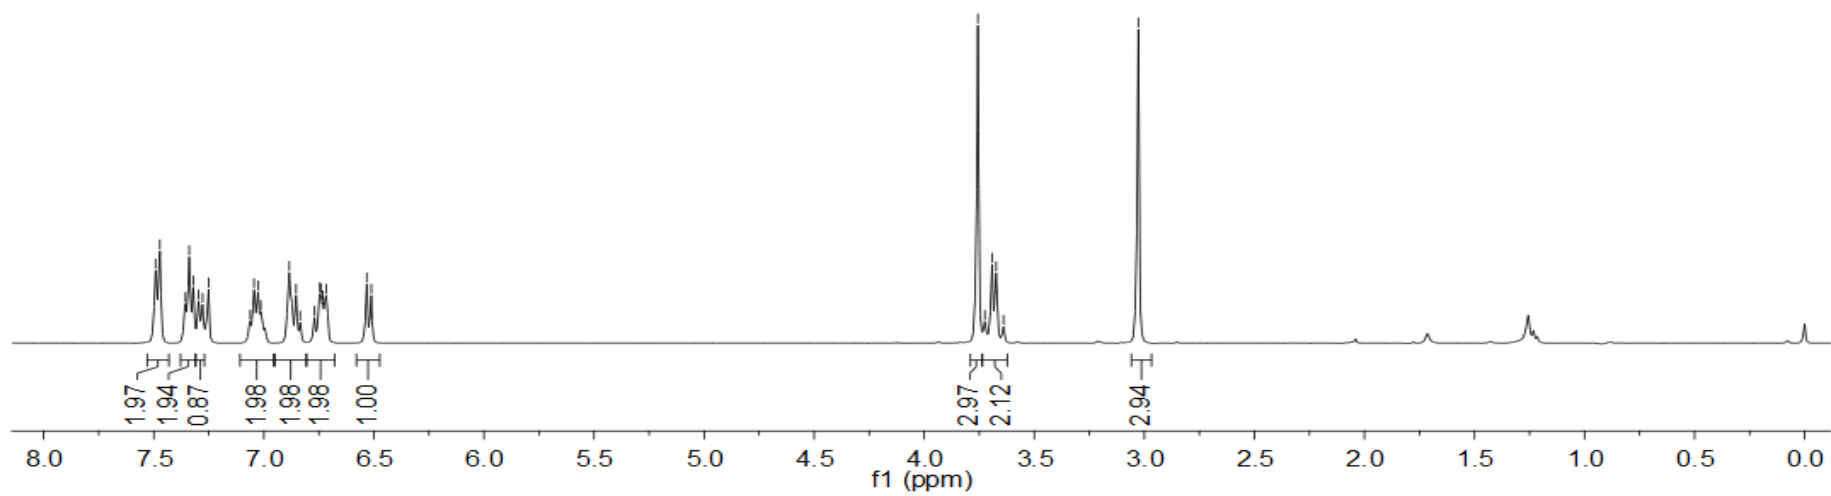

$^{13}\text{C}$  NMR (101 MHz,  $\text{CDCl}_3$ ) of compound **4u**

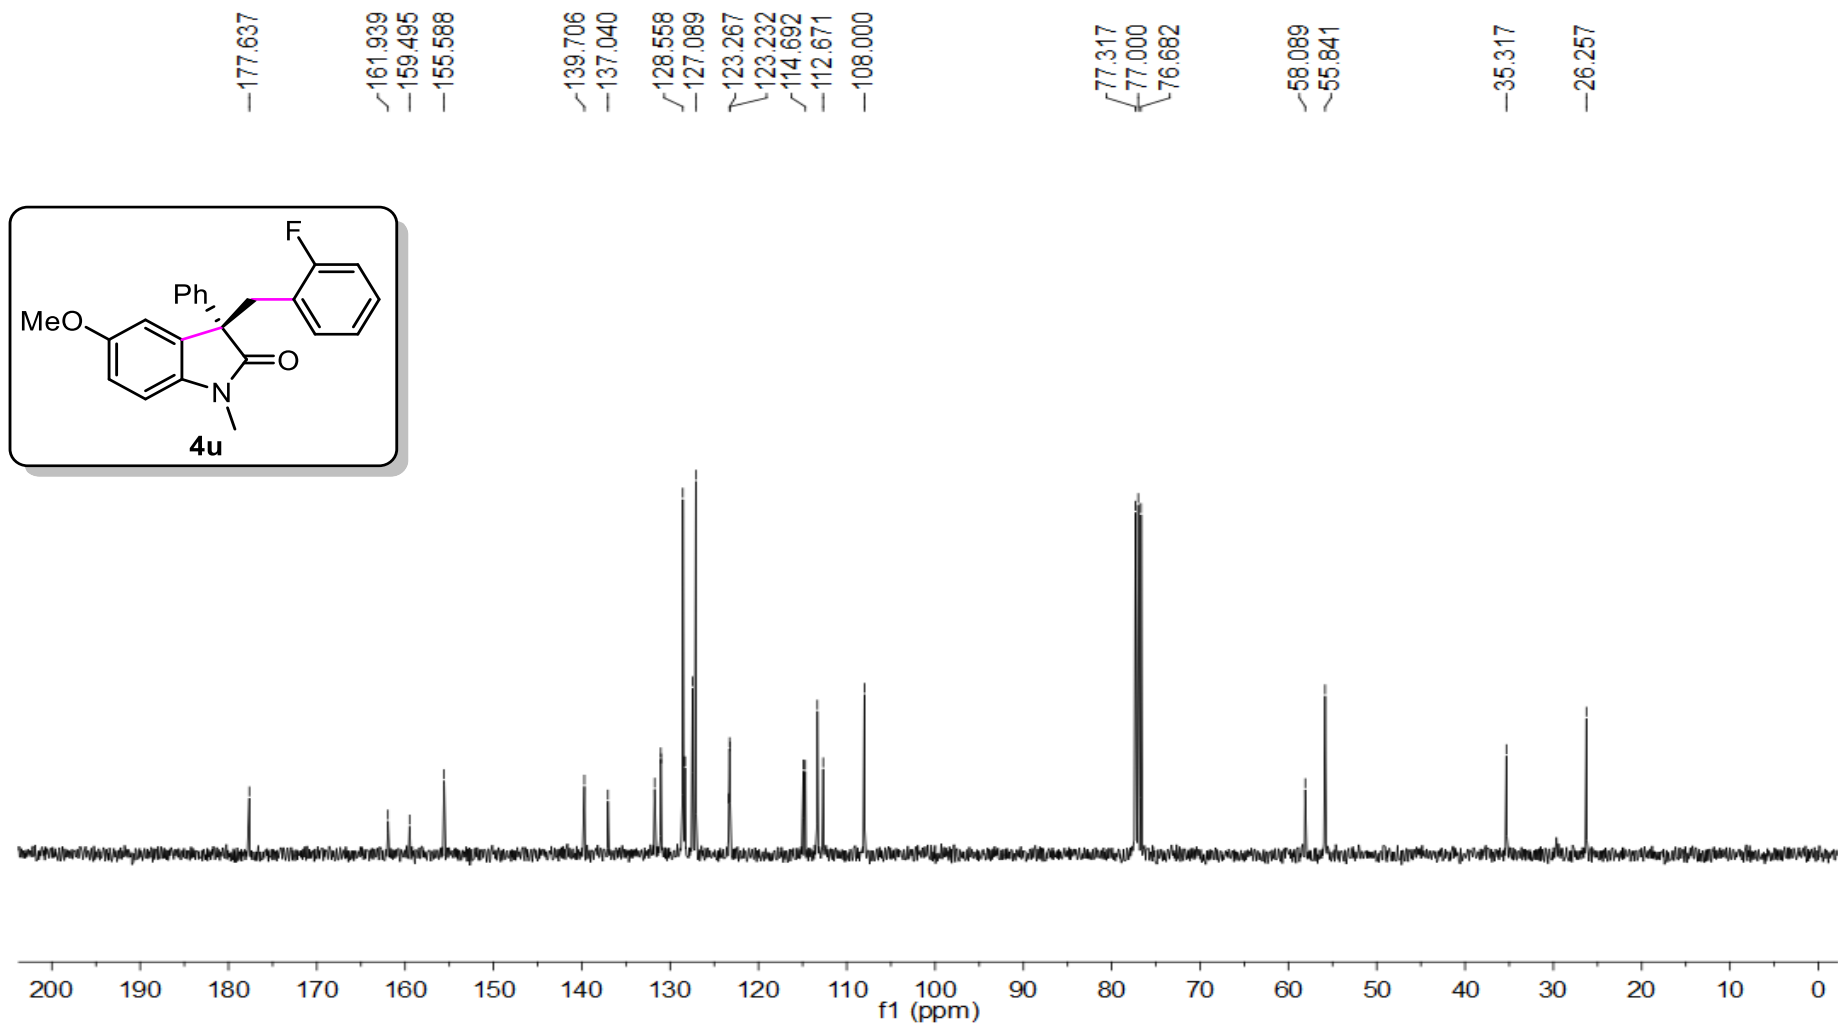

$^1\text{H}$  NMR (400 MHz,  $\text{CDCl}_3$ ) of compound **4v**

7.455  
7.324  
7.303  
7.286  
7.259  
6.892  
6.758  
6.743  
6.737  
6.628  
6.612  
6.591  
6.586  
6.568  
6.547  
6.533  
6.515  
6.492  
6.486  
-3.774  
-3.637  
-3.040

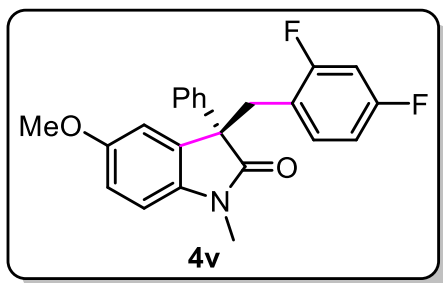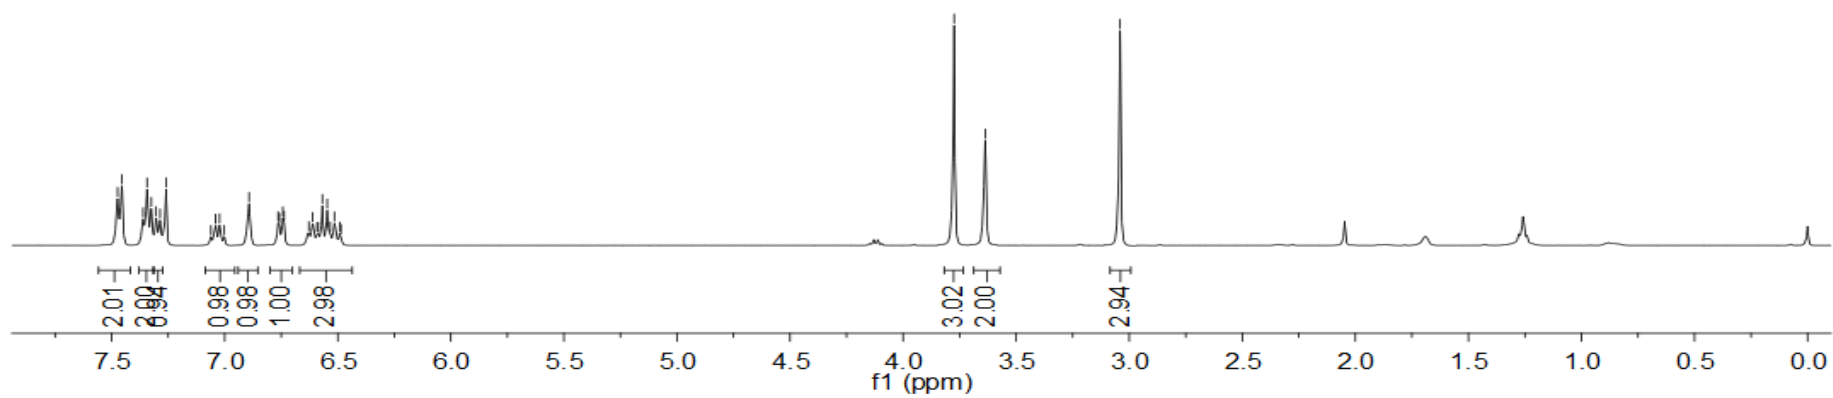

$^{13}\text{C}$  NMR (101 MHz,  $\text{CDCl}_3$ ) of compound **4v**

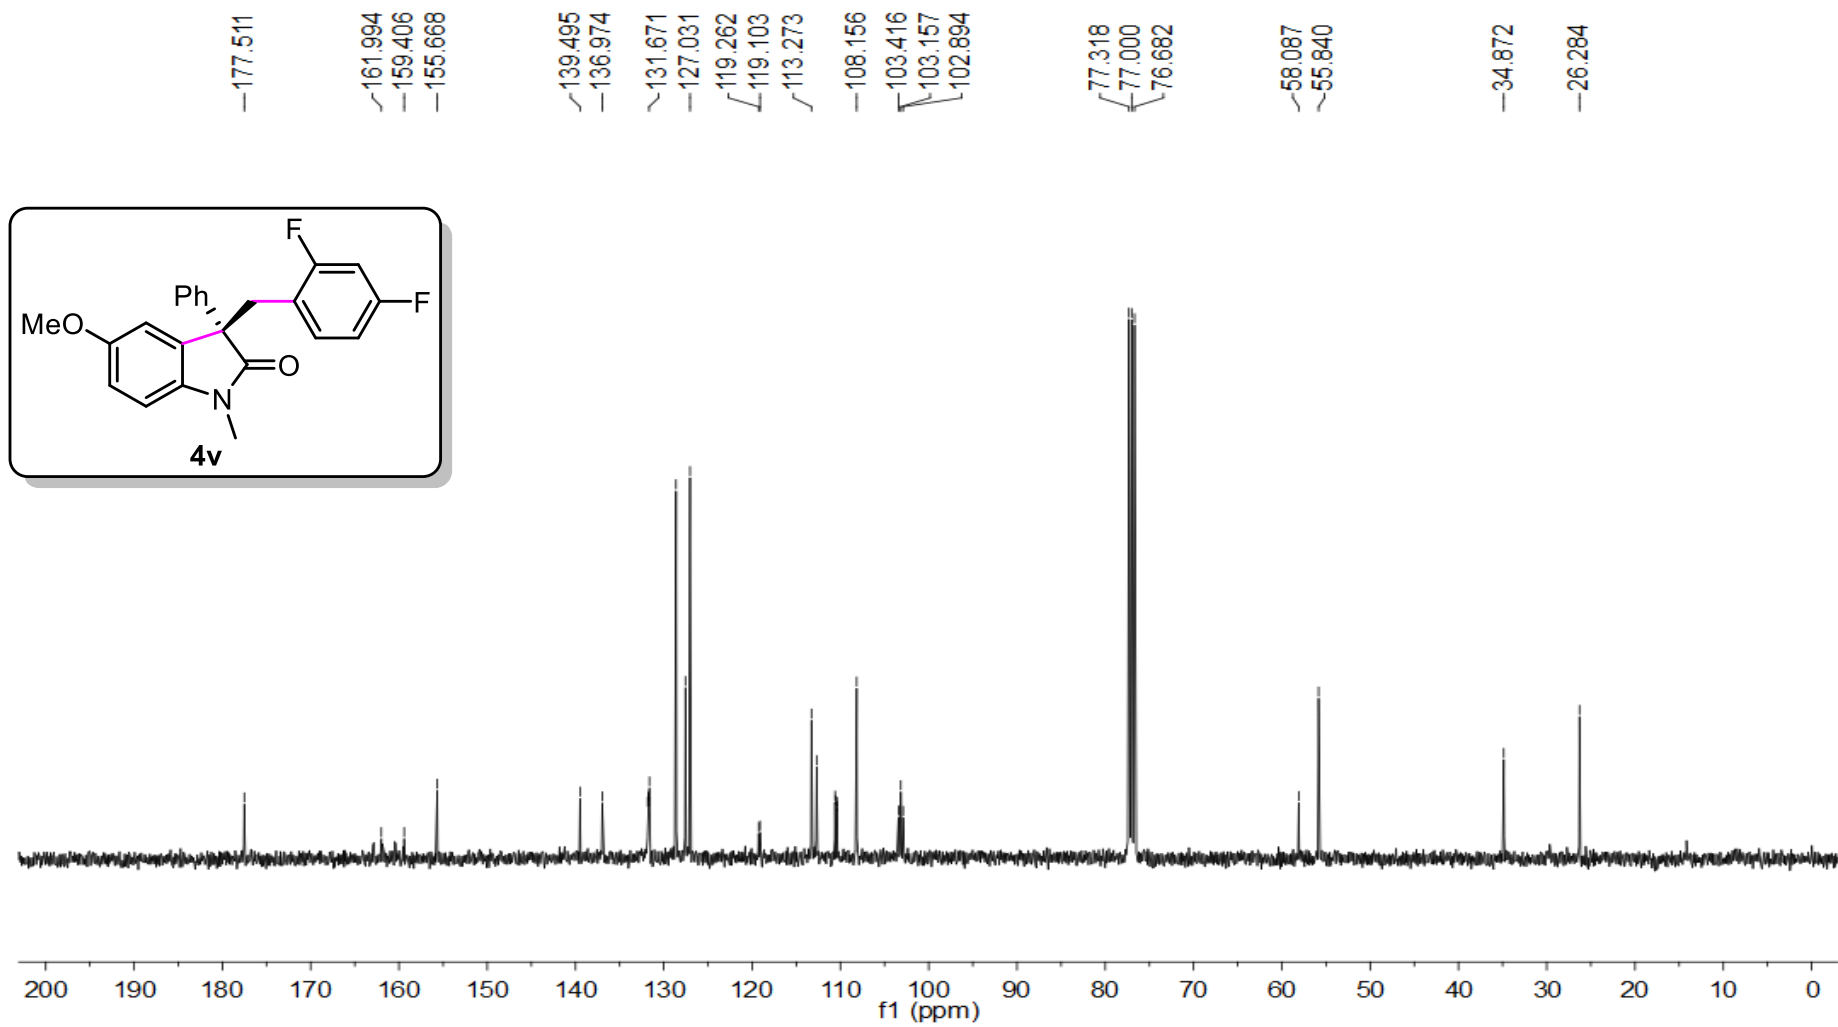

$^1\text{H}$  NMR (400 MHz,  $\text{CDCl}_3$ ) of compound **4w**

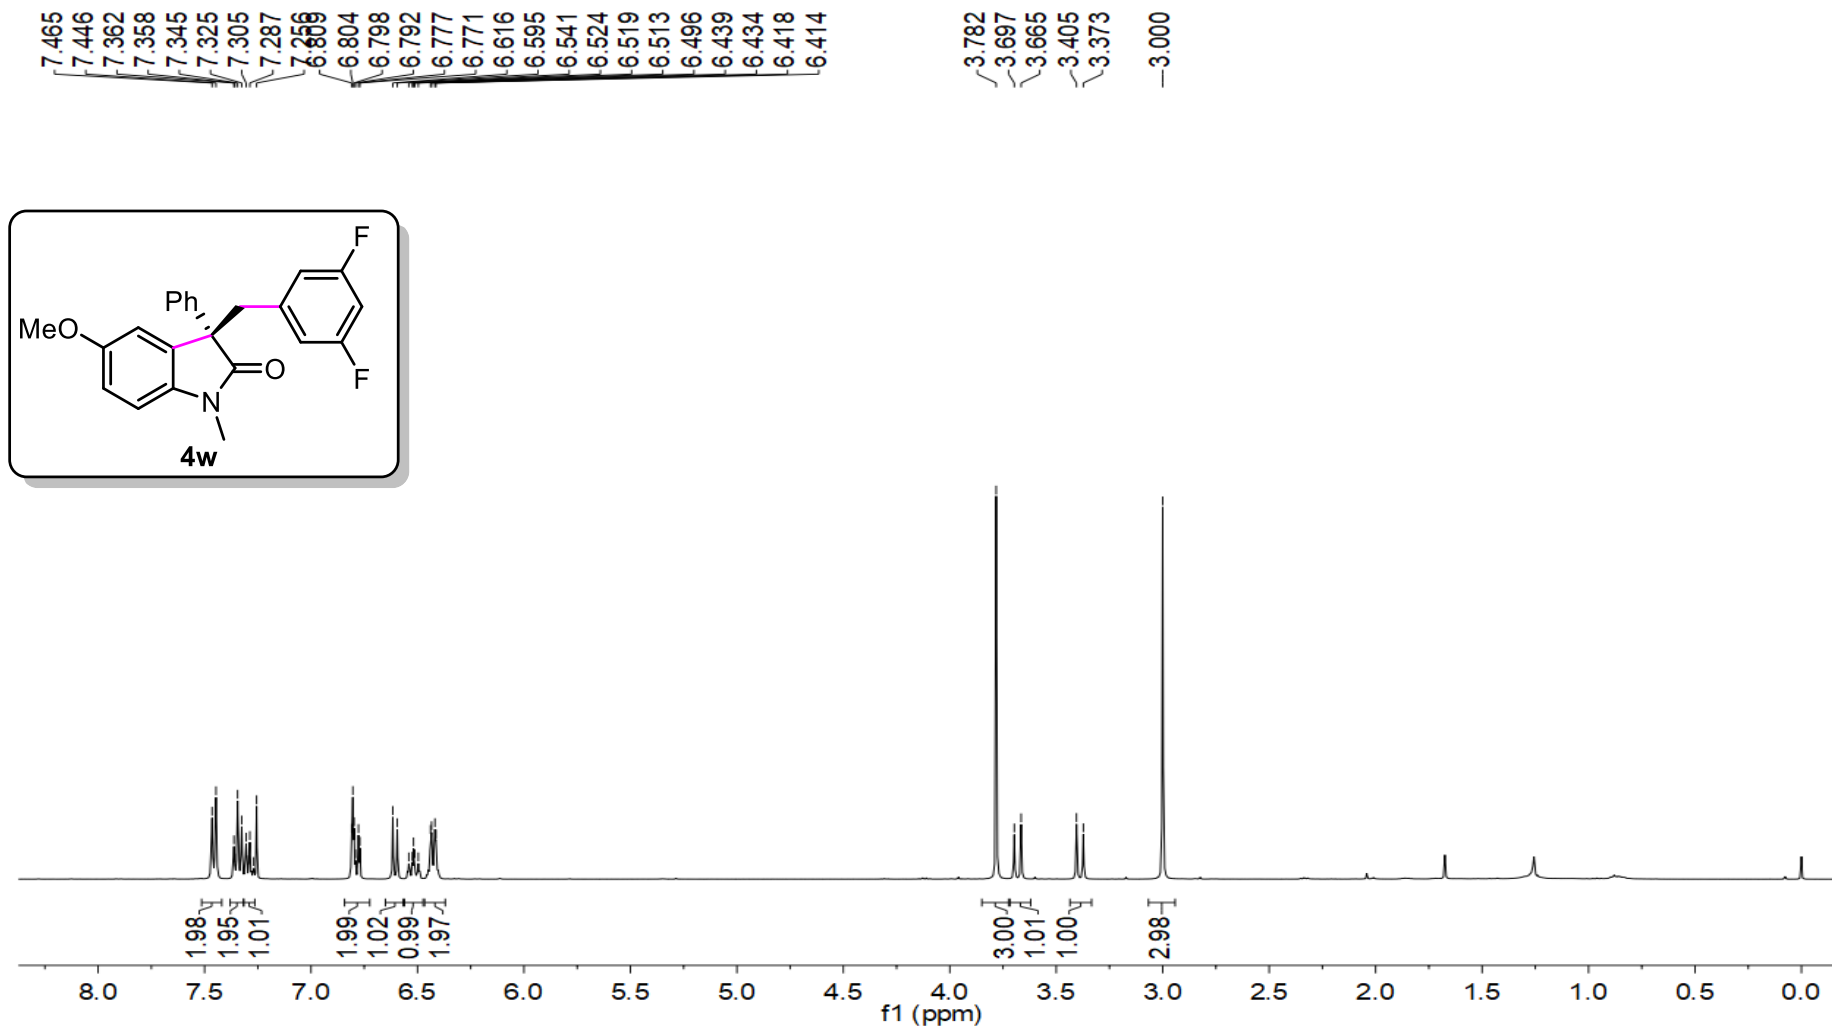

$^{13}\text{C}$  NMR (101 MHz,  $\text{CDCl}_3$ ) of compound **4w**

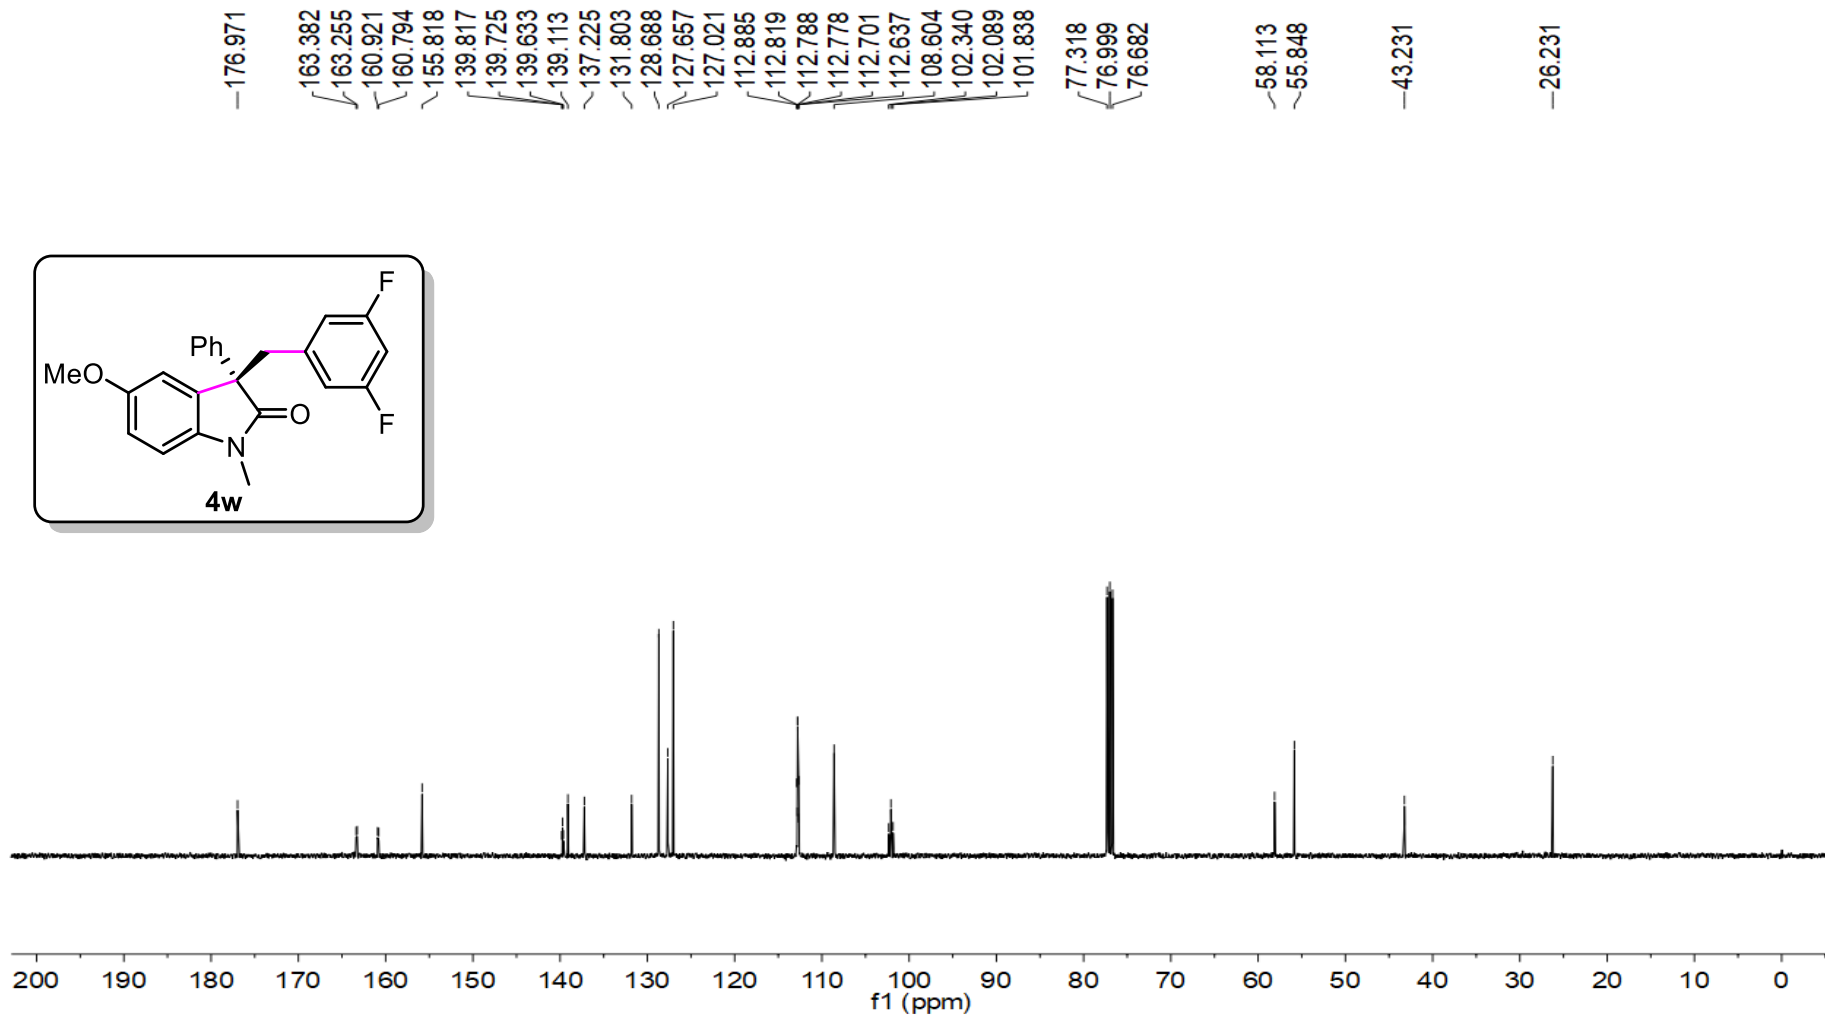

$^1\text{H}$  NMR (400 MHz,  $\text{CDCl}_3$ ) of compound **4x**

7.499  
7.496  
7.491  
7.477  
7.363  
7.361  
7.343  
7.324  
7.301  
7.298  
7.283  
7.253  
7.139  
7.133  
7.123  
7.120  
7.116  
7.069  
7.064  
7.053  
7.046  
6.992  
6.986  
6.982  
6.976  
6.968  
6.964  
6.960  
6.875  
6.868  
6.740  
6.733  
6.719  
6.712  
6.568  
6.547  
3.923  
3.890  
3.817  
3.783  
3.733  
3.088

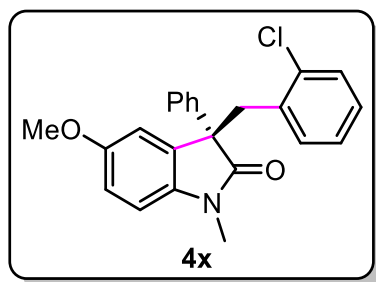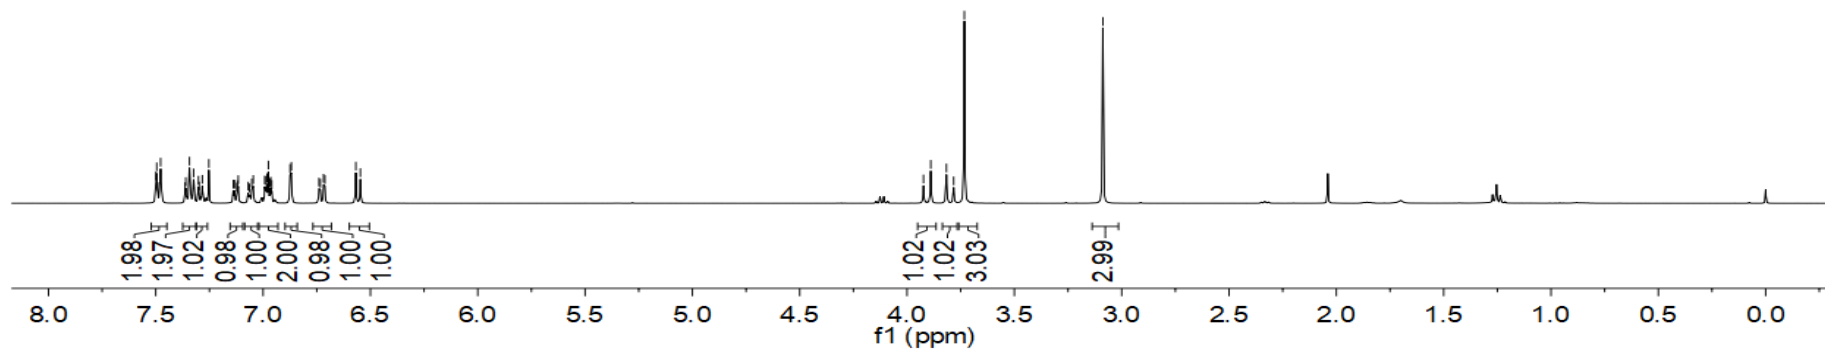

$^{13}\text{C}$  NMR (101 MHz,  $\text{CDCl}_3$ ) of compound **4x**

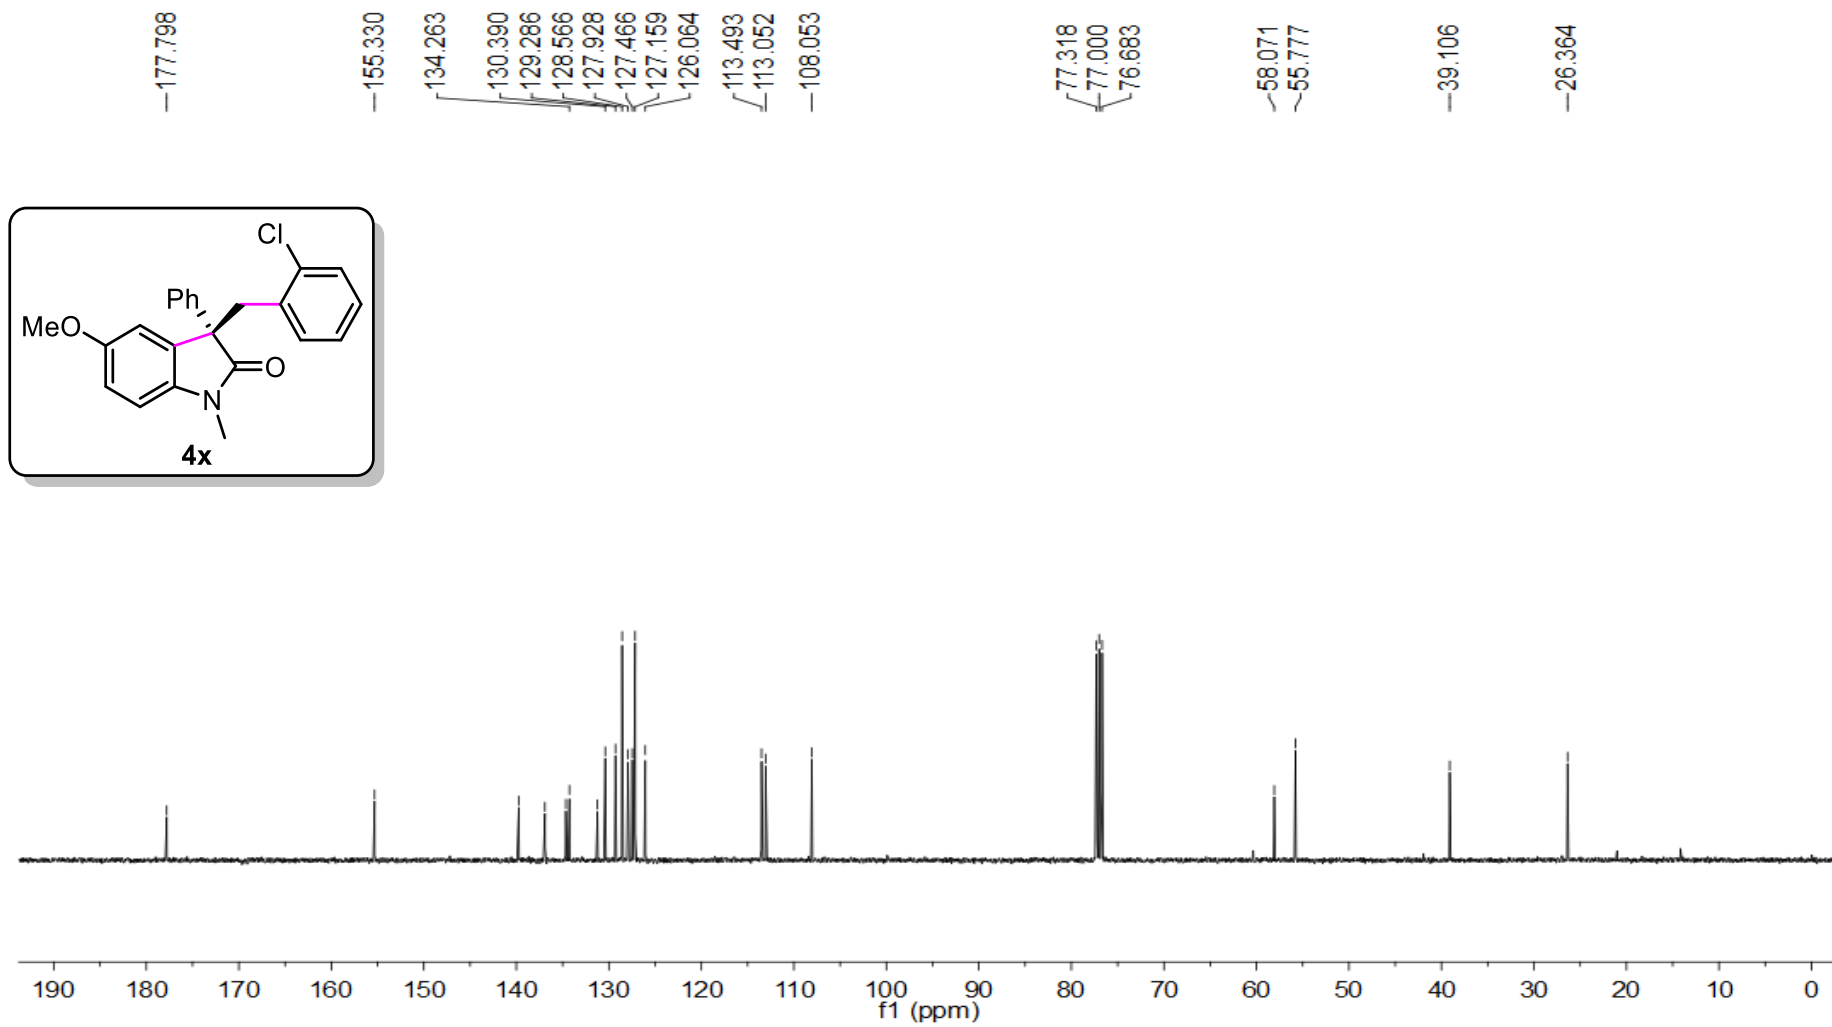



$^1\text{H}$  NMR (400 MHz,  $\text{CDCl}_3$ ) of compound **4y**

7.930  
7.923  
7.914  
7.559  
7.362  
7.166  
7.052  
6.584  
6.578  
6.573  
6.567  
6.561  
6.555  
6.433  
6.422  
6.410  
4.183  
4.148  
4.048  
4.013  
3.472  
2.919

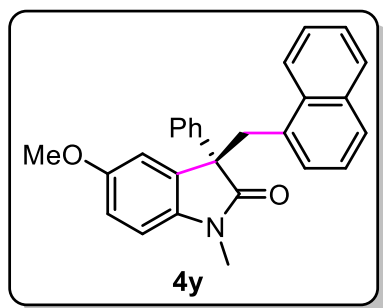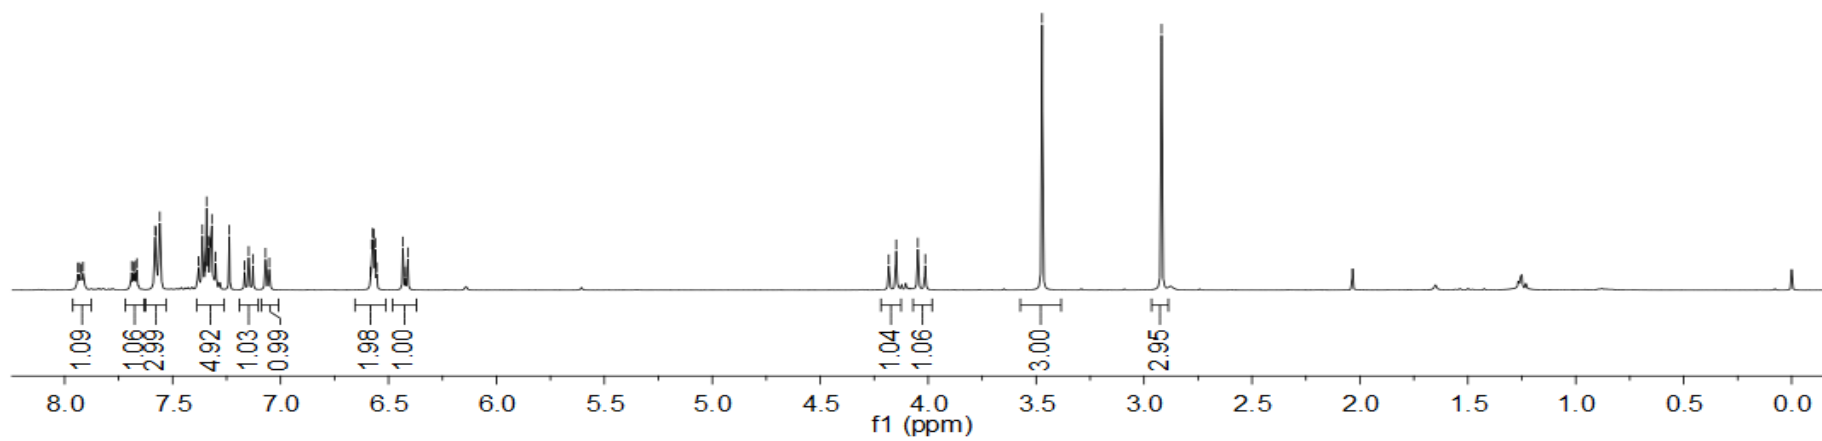

$^{13}\text{C}$  NMR (101 MHz,  $\text{CDCl}_3$ ) of compound **4y**

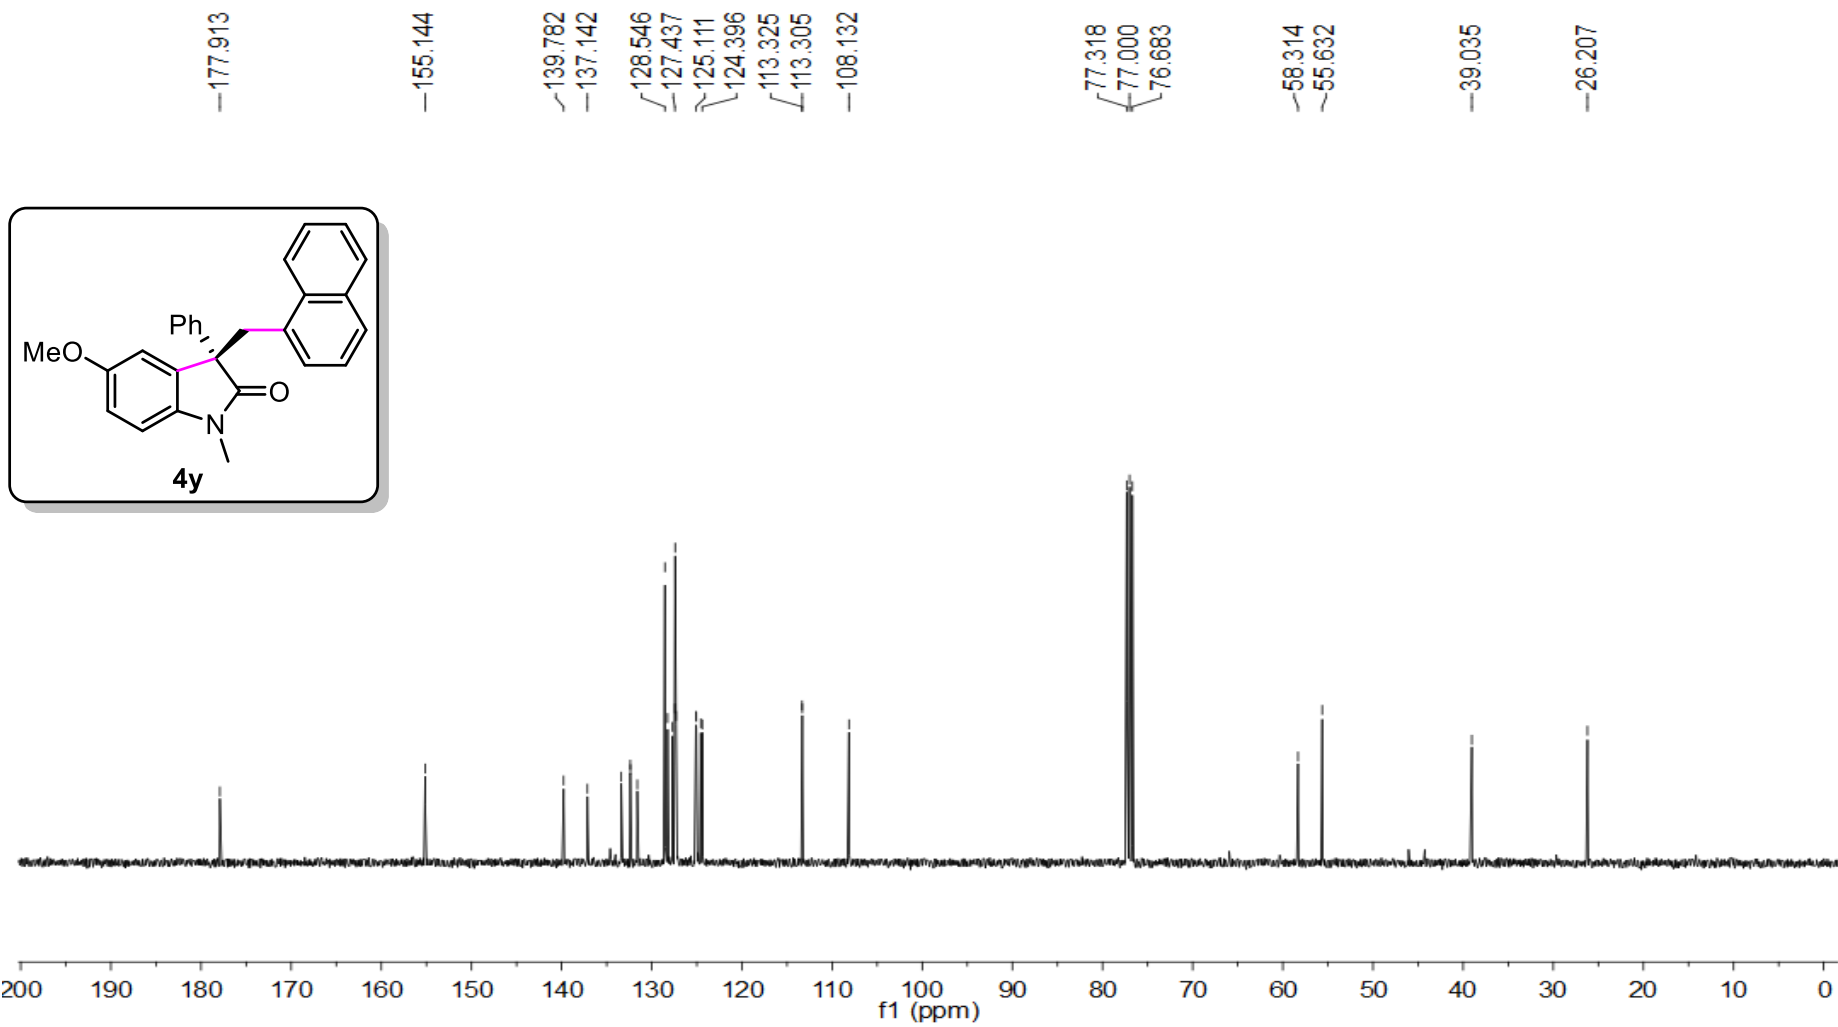

$^1\text{H}$  NMR (400 MHz,  $\text{CDCl}_3$ ) of compound **4z**

7.666  
7.602  
7.520  
7.373  
7.354  
7.316  
7.244  
6.974  
6.850  
6.679  
6.440  
6.419

3.876  
3.844  
3.739  
3.615  
3.583

2.865

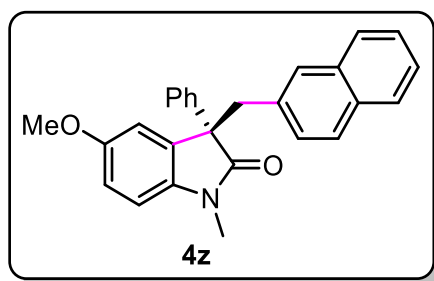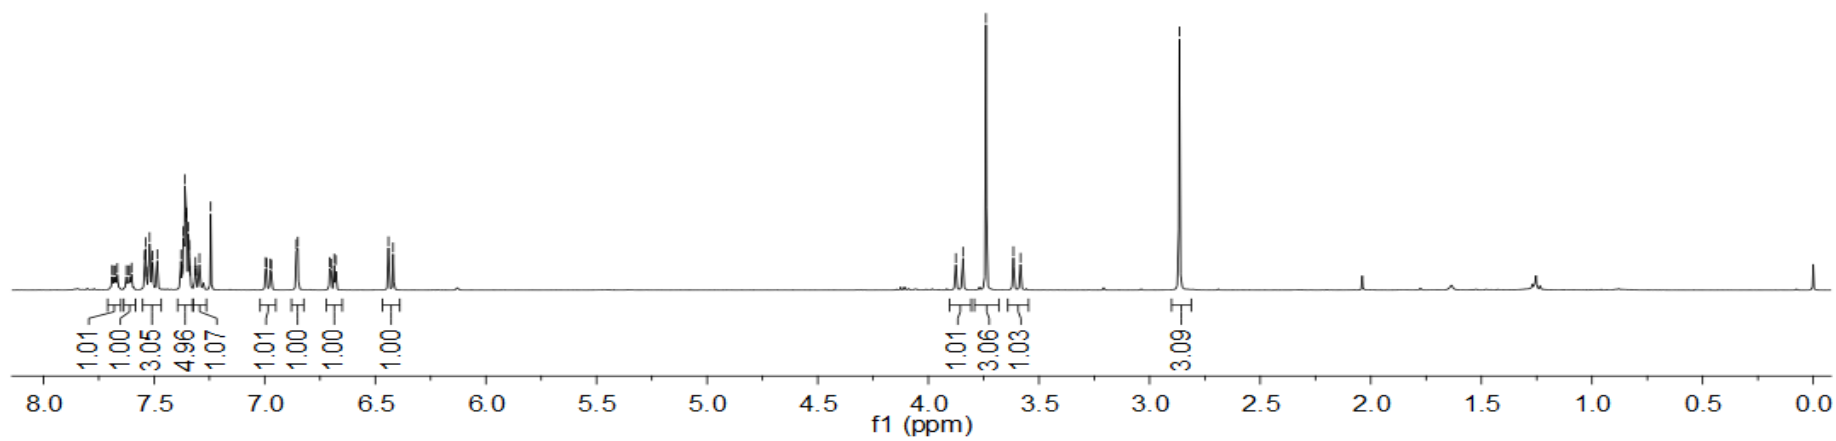

$^{13}\text{C}$  NMR (101 MHz,  $\text{CDCl}_3$ ) of compound **4z**

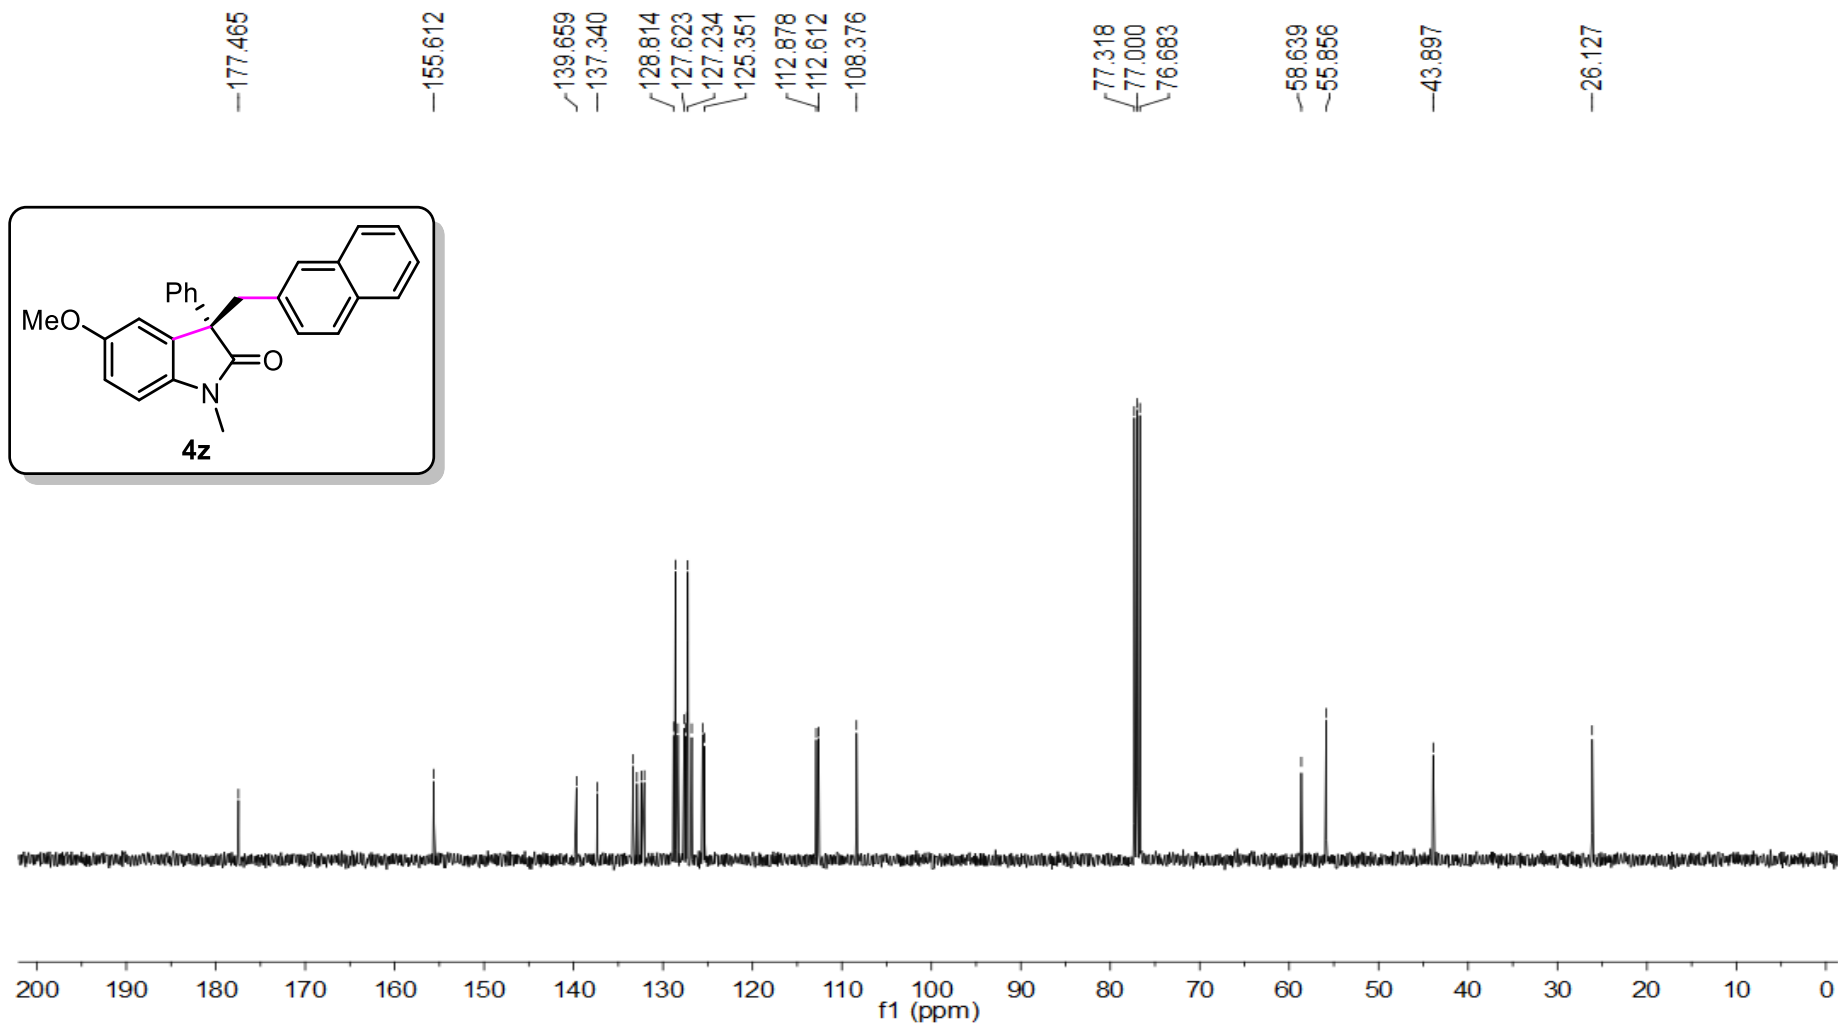

$^1\text{H}$  NMR (400 MHz,  $\text{CDCl}_3$ ) of compound **5a**

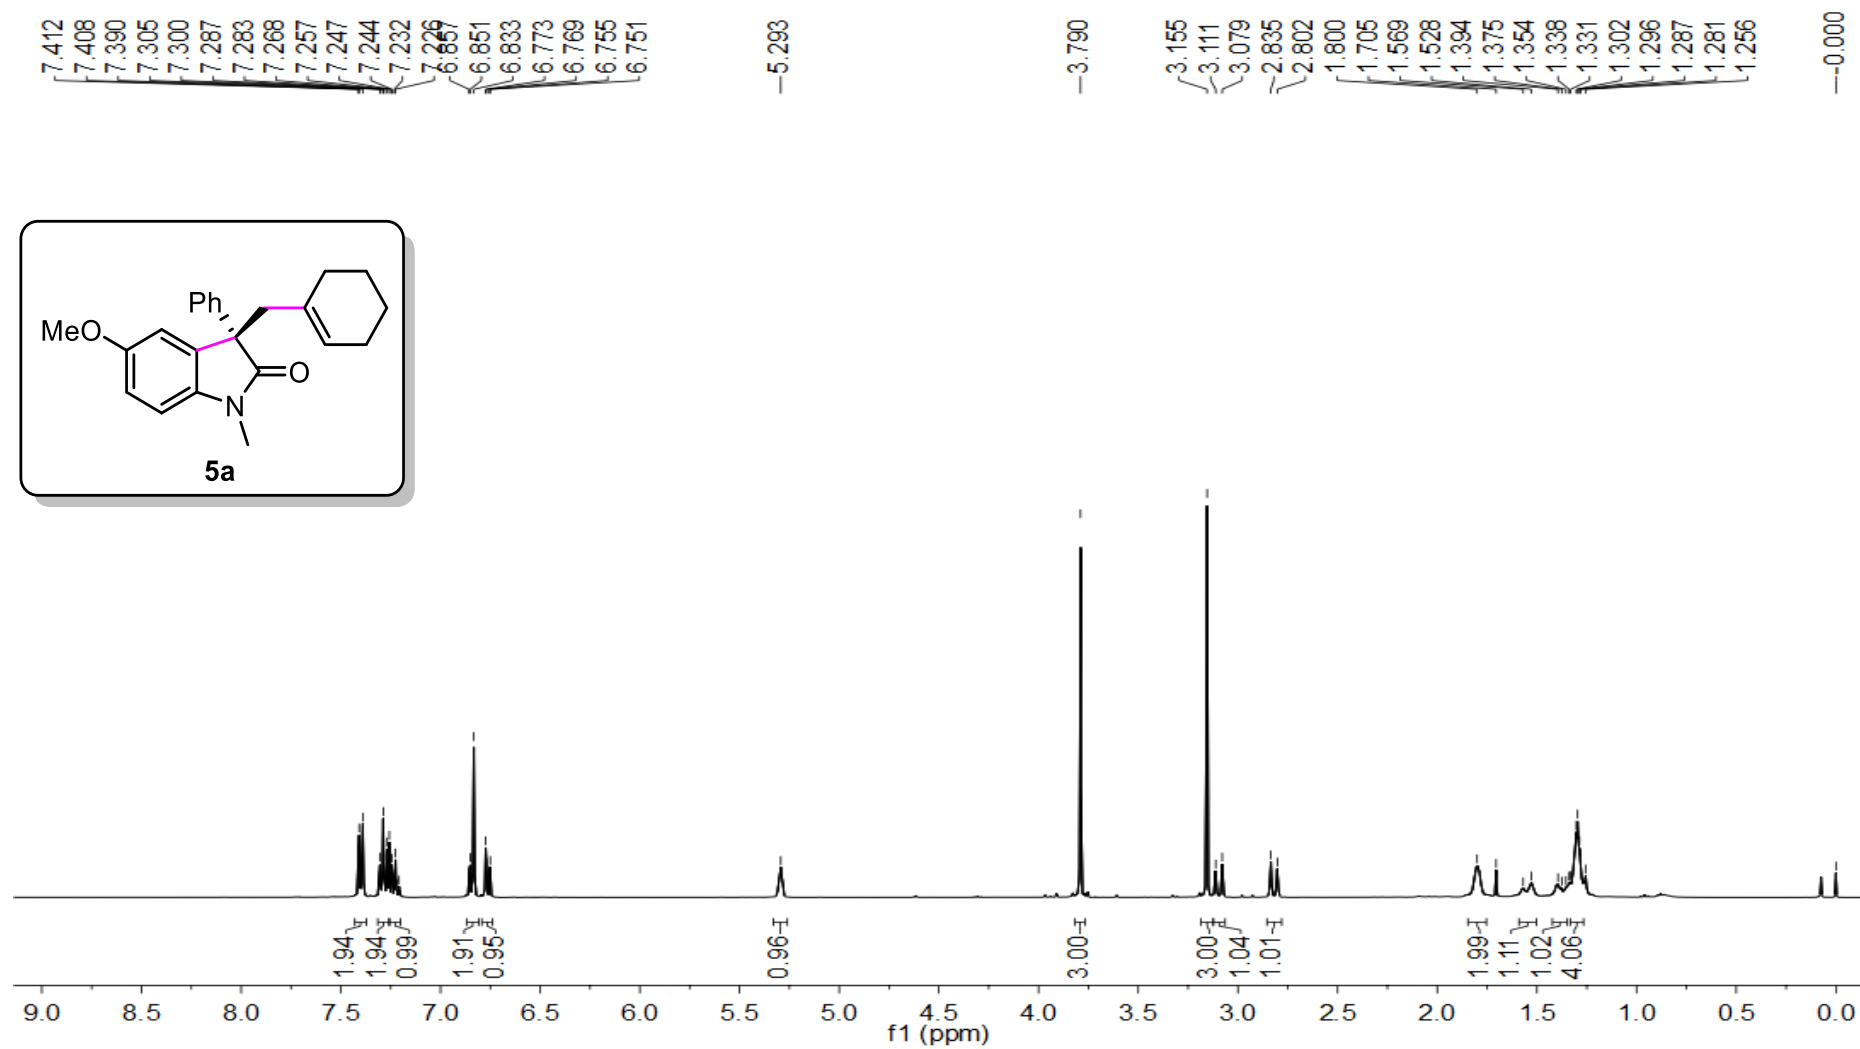

$^{13}\text{C}$  NMR (101 MHz,  $\text{CDCl}_3$ ) of compound **5a**

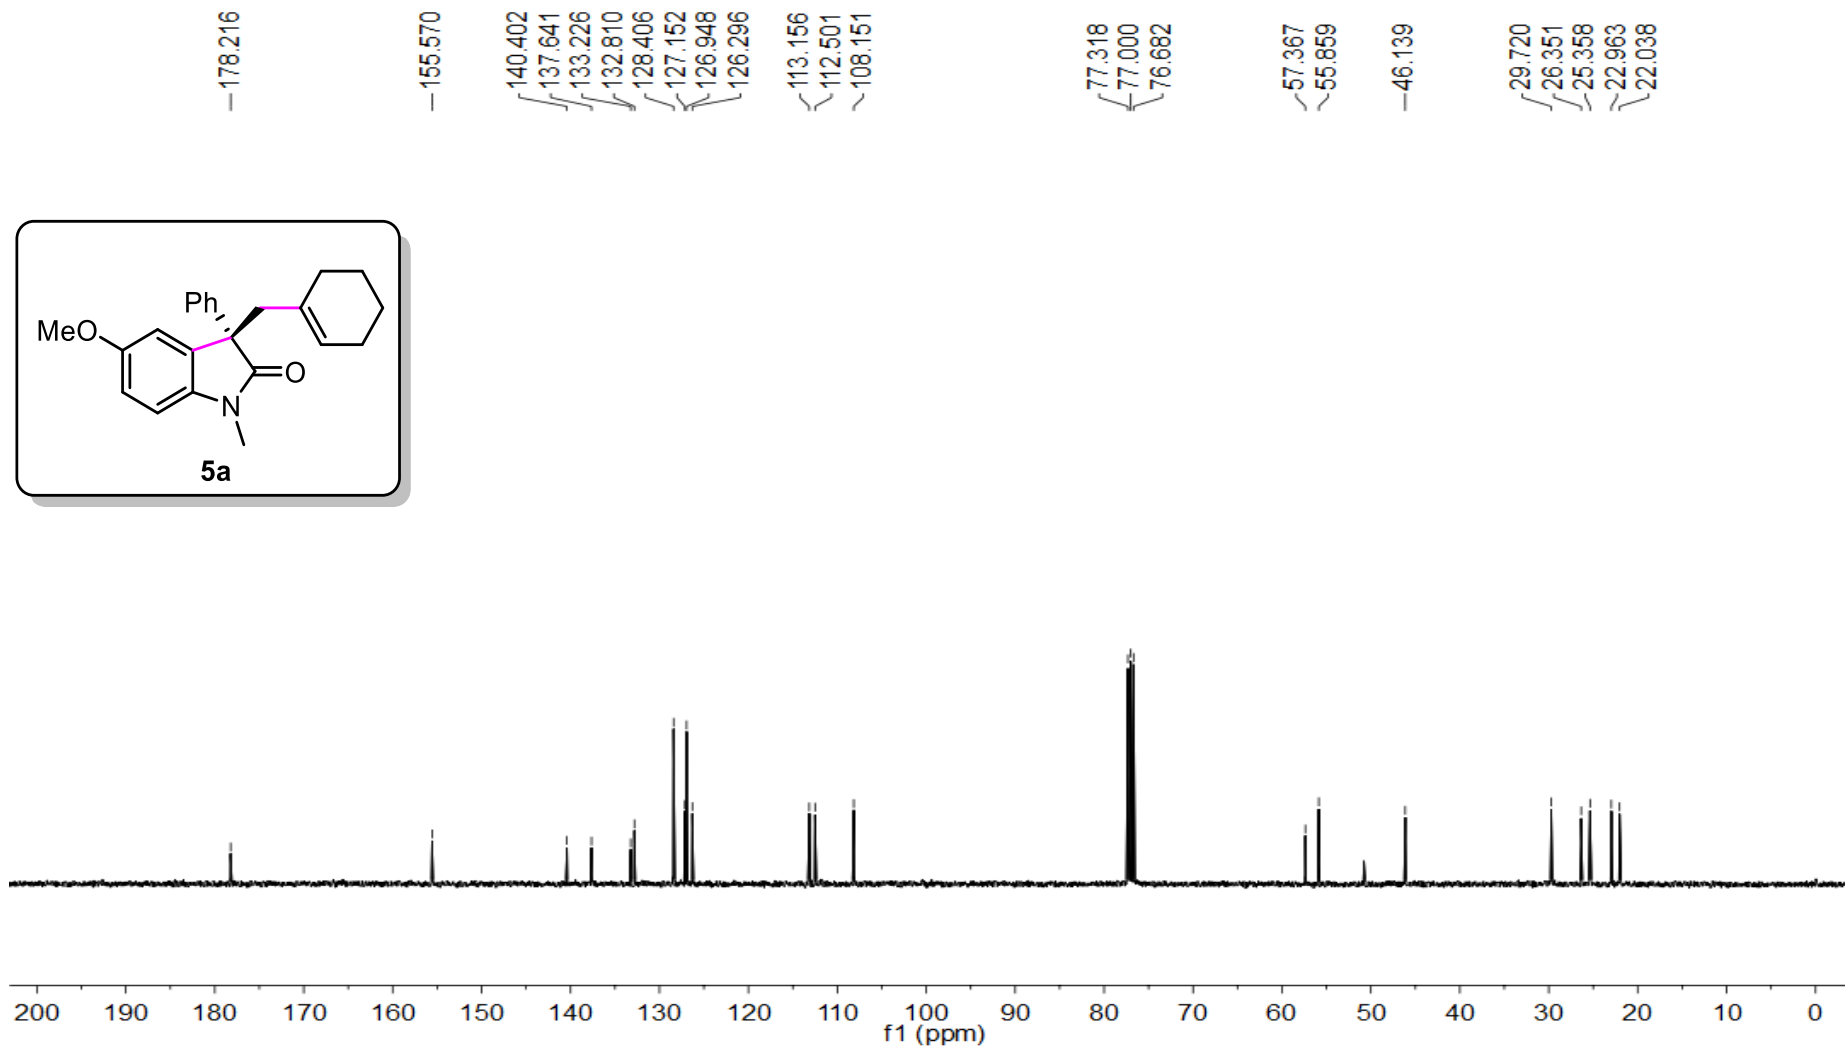

<sup>1</sup>H NMR (400 MHz, CDCl<sub>3</sub>) of compound **6**

7.281  
7.261  
7.251  
7.241  
7.109  
7.089  
7.068  
7.064  
7.045  
7.041  
7.027  
7.007  
6.995  
6.990  
6.985  
6.966  
6.946  
6.846  
6.837  
6.831  
6.826  
6.818  
6.728  
6.709  
6.652  
6.648

3.779  
3.656  
3.624  
3.382  
3.350  
-2.960

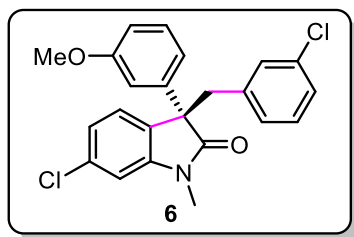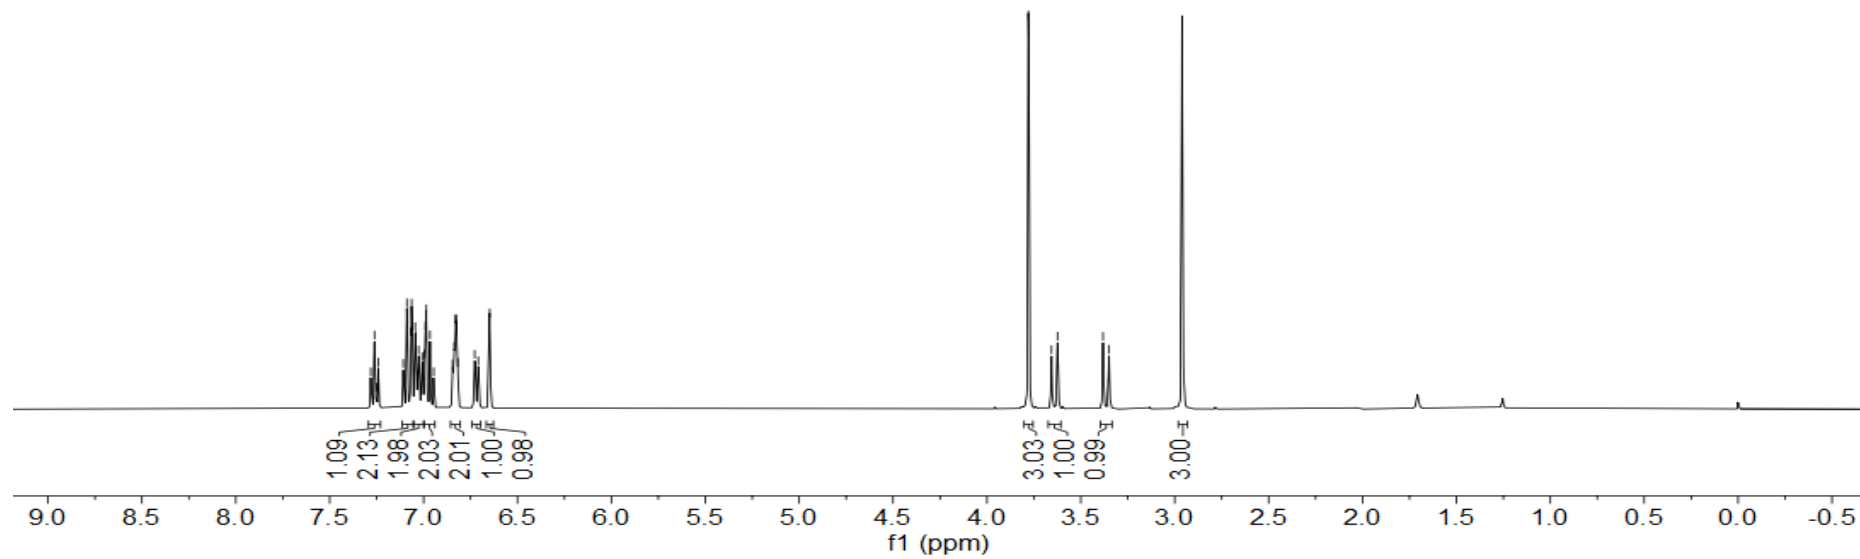

$^{13}\text{C}$  NMR (101 MHz,  $\text{CDCl}_3$ ) of compound **6**

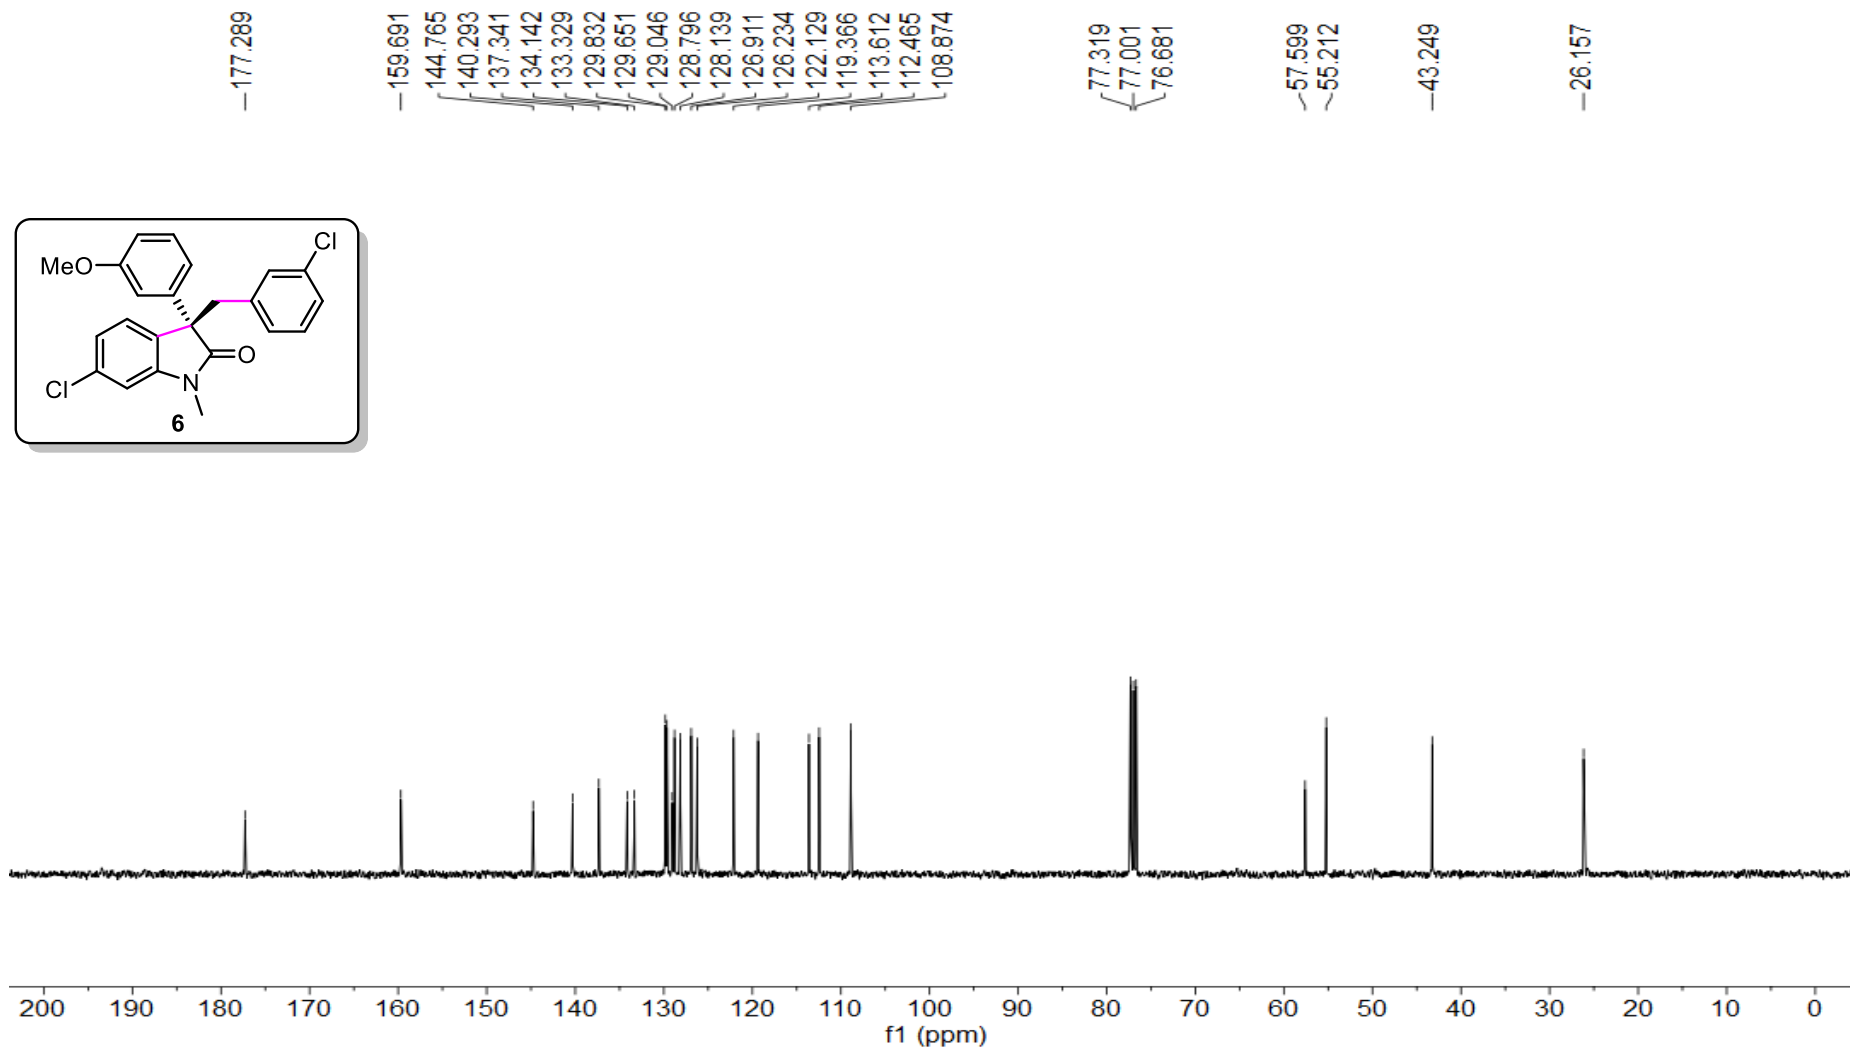

Supplement: d2qo00998f1.pdf [file d2qo00998f1.pdf]
